# Supplementary material for: Autophagy-dependent TOR reactivation drives fungal growth in living host rice cells
Source: Research Square preprint supplement (doi:10.21203/rs.3.rs-1344614/v1), 2022-03-02
Supplement: Supplementary file 1 [file 68290227a1ecc79d3ad6a32b.xlsx]

## Sheet: Sheet 1
Supplementary Table 8. Strains used in this study.
Strain	Genotype	Reference or source
Magnaporthe oryzae strains
Guy11	M. oryzae wild type (WT) isolate used in this study	Wilson et al. 2010
H1-RFP	Guy11 expressing histone H1-RFP	Saunders et al. 2010
∆rim15	RIM15 disrupted in Guy11	This study
∆rim15 RIM15-GFP	∆rim15 complemented with RIM15-GFP	This study
∆rim15 PWL2-mCherryNLS Bas4-GFP	∆rim15 carrying pBV591	This study
H1-RFP RIM15-GFP	H1-RFP strain carrying RIM15-GFP	This study
∆rim15 GFP-ATG8	∆rim15 carrying GFP-ATG8	This study
RIM15+ PWL2-mCherryNLS Bas4-GFP	Guy11 carrying pBV591	This study
RIM15+ GFP-ATG8	Guy11 carrying GFP-ATG8	This study
∆asn1 pBV591	ASN1 disrupted in Guy11 carrying pBV591	This study
∆imp1	IMP1 disrupted in Guy11	Sun et al. 2018
E.coli strain for gene cloning
E. coli DH5α	supE44 DlacU169(f80lacZDM15) hsdR17 recA1 endA1 gyrA96 thi-1 relA1, Nalr	Hanahan 1983
Stellar™	F-, endA1, supE44, thi-1, recA1, relA1, gyrA96, phoA, Φ80d lacZΔ M15, Δ (lacZYA - argF) U169, Δ (mrr - hsdRMS - mcrBC), ΔmcrA, λ–	Stellar™ Competent Cells Protocol
References
Wilson R. A., Gibson, R. P., Quispe, C. F., Littlechild, J. A. & Talbot, N. J. An NADPH-dependent genetic switch regulates plant infection by the rice blast fungus. Proc. Natl. Acad. Sci. USA 107, 21902-21907 (2010) .
Saunders, D. G., Aves, S. J. & Talbot, N. J. Cell cycle-mediated regulation of plant infection by the rice blast fungus. Plant Cell 22, 497-507 (2010).
Sun, G., Elowsky, C., Li, G. & Wilson, R. A. TOR-autophagy branch signaling via Imp1 dictates plant-microbe biotrophic interface longevity. PLoS Genet. 14, e1007814 (2018).
Hanahan, D. Studies on transformation of Escherichia coli with plasmids. J. Mol. Biol. 166, 557-580 (1983).
Stellar™ Competent Cells Protocol PT5055-2. Clontech (https://www.takarabio.com/products/)
