# Supplementary material for: Autophagy-dependent TOR reactivation drives fungal growth in living host rice cells
Source: Research Square preprint supplement (doi:10.21203/rs.3.rs-1344614/v1), 2022-03-02
Supplement: Supplementary file 2 [file 82d51e0131c3b5612cb753c2.xlsx]

## Sheet: DESeq2_DEG_rim15_vs_WT_padj005_
Supplementary Table 1. RNAseq analysis by DESeq2 of differentially expressed genes in Δrim15- vs Guy11-infected rice leaf sheath cells at 36 hpi.
gene_id	ensembl_gene_id	ensembl_transcript_id	description	protein_name	gene_biotype	GO	kegg_path	ko_entry	EC	Guy11_36h_R1	Guy11_36h_R2	Guy11_36h_R3	Δrim15_36h_R1	Δrim15_36h_R2	Δrim15_36h_R3	baseMean	fc (Δrim15/Guy11)	log2FoldChange ( Δrim15/Guy11)	lfcSE	stat	pvalue	padj	sig
2676434	MGG_03504	MGG_03504T0	Putative uncharacterized protein [Source:UniProtKB/TrEMBL;Acc:G4N7Z6]	uncharacterized protein	protein_coding	NA	NA	NA	NA	579.85	536.14	412.614	67.293	65.5611	58.0117	286.578	0.124104	-3.01038	0.25094	-11.9964	3.7105e-33	3.21107e-29	down
2675046	MGG_00080	MGG_00080T0	Putative uncharacterized protein [Source:UniProtKB/TrEMBL;Acc:G4NEQ2]	uncharacterized protein	protein_coding	GO:0046872(metal ion binding); GO:0003676(nucleic acid binding); GO:0008270(zinc ion binding); GO:0005622(intracellular)	NA	NA	NA	37.6189	27.2613	22.9566	236.545	332.603	196.785	142.295	8.71793	3.12399	0.30698	10.1765	2.52415e-24	1.0922e-20	up
2676036	MGG_05406	MGG_05406T0	Putative uncharacterized protein [Source:UniProtKB/TrEMBL;Acc:G4MLC5]	uncharacterized protein	protein_coding	GO:0003674(molecular_function); GO:0008150(biological_process); GO:0005575(cellular_component)	NA	NA	NA	613.577	811.35	636.743	140.704	116.731	170.623	414.954	0.20875	-2.26015	0.233395	-9.68381	3.53299e-22	1.01915e-18	down
2674167	MGG_01147	MGG_01147T0	Alpha-N-arabinofuranosidase A [Source:UniProtKB/TrEMBL;Acc:G4NBZ0]	alpha-N-arabinofuranosidase A	protein_coding	GO:0046373(L-arabinose metabolic process); GO:0046556(alpha-L-arabinofuranosidase activity); GO:0005575(cellular_component); GO:0016787(hydrolase activity); GO:0031222(arabinan catabolic process)	00520(Amino sugar and nucleotide sugar metabolism)	K01209	ec:3.2.1.55	509.801	447.865	408.99	85.6457	62.363	106.924	270.265	0.188246	-2.40931	0.252685	-9.53483	1.50129e-21	3.24804e-18	down
2683795	MGG_07868	NA	NA	glycosyl hydrolase family 10	NA	NA	NA	K01181	ec:3.2.1.8	355.434	368.028	320.184	87.6848	68.7593	84.1738	214.044	0.230366	-2.118	0.22677	-9.33984	9.64782e-21	1.66985e-17	down
2682555	MGG_03002	MGG_03002T0	Putative uncharacterized protein [Source:UniProtKB/TrEMBL;Acc:G4NL14]	uncharacterized protein	protein_coding	GO:0006281(DNA repair); GO:0003913(DNA photolyase activity); GO:0018298(protein-chromophore linkage)	NA	K01669	ec:4.1.99.3	103.128	244.703	226.545	4.07836	1.59905	13.6498	98.9505	0.037144	-4.75073	0.558337	-8.50871	1.75873e-17	2.53668e-14	down
2675590	MGG_05046	MGG_05046T0	Adenine phosphoribosyltransferase [Source:UniProtKB/TrEMBL;Acc:G4N428]	adenine phosphoribosyltransferase	protein_coding	GO:0005737(cytoplasm); GO:0050660(flavin adenine dinucleotide binding); GO:0016740(transferase activity); GO:0003824(catalytic activity); GO:0016491(oxidoreductase activity); GO:0006695(cholesterol biosynthetic process); GO:0004631(phosphomevalonate kinase activity); GO:0055114(oxidation-reduction process); GO:0044271(cellular nitrogen compound biosynthetic process); GO:0009116(nucleoside metabol…	NA	NA	NA	7.78322	9.08712	7.24945	71.3714	174.297	83.0364	58.804	13.6545	3.7713	0.444535	8.4837	2.1814e-17	2.69683e-14	up
2680152	MGG_09036	NA	NA	alpha-L-arabinofuranosidase	NA	NA	NA	NA	NA	151.773	83.0822	166.133	10.1959	1.59905	9.09987	70.3138	0.0521568	-4.261	0.527322	-8.08045	6.45262e-16	6.98012e-13	down
2683566	MGG_07646	MGG_07646T0	Alpha-glucuronidase [Source:UniProtKB/TrEMBL;Acc:G4N306]	alpha-glucuronidase	protein_coding	GO:0005975(carbohydrate metabolic process); GO:0052051(obsolete interaction with host via protein secreted by type II secretion system); GO:0045493(xylan catabolic process); GO:0005576(extracellular region); GO:0003824(catalytic activity); GO:0046559(alpha-glucuronidase activity); GO:0043169(cation binding); GO:0016787(hydrolase activity); GO:0008152(metabolic process); GO:0016798(hydrolase activ…	NA	K01235	ec:3.2.1.139	192.635	158.375	137.74	16.3135	17.5896	37.537	93.3649	0.152891	-2.70942	0.360392	-7.51797	5.56318e-14	5.34931e-11	down
2682437	MGG_02884	MGG_02884T0	Beta-Ig-H3/Fasciclin [Source:UniProtKB/TrEMBL;Acc:G5EHM3]	beta-Ig-H3/Fasciclin	protein_coding	GO:0003674(molecular_function); GO:0005575(cellular_component)	NA	NA	NA	356.082	913.255	734.611	91.7632	113.533	135.361	390.767	0.170939	-2.54844	0.341148	-7.47019	8.00778e-14	6.92993e-11	down
2675598	MGG_04889	MGG_04889T0	Putative uncharacterized protein [Source:UniProtKB/TrEMBL;Acc:G4N2R2]	uncharacterized protein	protein_coding	GO:0003674(molecular_function); GO:0008150(biological_process); GO:0005575(cellular_component)	NA	NA	NA	71.3462	86.3276	76.7233	6.11755	6.39621	6.82491	42.2893	0.0832278	-3.58679	0.497921	-7.20354	5.86704e-13	4.61576e-10	down
5050097	MGG_12722	MGG_12722T0	Putative uncharacterized protein [Source:UniProtKB/TrEMBL;Acc:G4N968]	uncharacterized protein	protein_coding	NA	NA	NA	NA	169.934	131.114	133.511	28.5486	31.981	11.3748	84.4105	0.159129	-2.65173	0.371166	-7.14434	9.04313e-13	6.52161e-10	down
2676848	MGG_03364	MGG_03364T0	Putative uncharacterized protein [Source:UniProtKB/TrEMBL;Acc:G4N8X2]	uncharacterized protein	protein_coding	NA	NA	NA	NA	7.78322	12.3325	3.0206	59.1363	182.292	77.3489	56.9856	13.8632	3.79319	0.533361	7.11187	1.1448e-12	7.62086e-10	up
2677876	MGG_04404	MGG_04404T0	Pisatin demethylase [Source:UniProtKB/TrEMBL;Acc:G4MKN0]	pisatin demethylase	protein_coding	GO:0046872(metal ion binding); GO:0009055(electron transfer activity); GO:0020037(heme binding); GO:0005506(iron ion binding); GO:0032259(methylation); GO:0016491(oxidoreductase activity); GO:0055114(oxidation-reduction process); GO:0004497(monooxygenase activity); GO:0016705(oxidoreductase activity, acting on paired donors, with incorporation or reduction of molecular oxygen); GO:0008168(methylt…	NA	NA	NA	146.584	127.869	94.8469	22.431	25.5848	19.3372	72.7754	0.180826	-2.46733	0.353413	-6.98144	2.92174e-12	1.80605e-09	down
2683799	MGG_07872	MGG_07872T0	Putative uncharacterized protein [Source:UniProtKB/TrEMBL;Acc:G4N1Z2]	uncharacterized protein	protein_coding	GO:0003674(molecular_function); GO:0005575(cellular_component)	NA	NA	NA	129.072	95.4147	83.9728	12.2351	14.3915	18.1997	58.8809	0.148981	-2.7468	0.395535	-6.9445	3.79791e-12	2.19114e-09	down
2677073	MGG_14358	NA	NA	uncharacterized protein	NA	NA	NA	NA	NA	11.0262	8.43804	13.8948	55.0579	137.519	68.2491	49.0308	7.81477	2.9662	0.439732	6.74549	1.52514e-11	8.24912e-09	up
2683893	MGG_07966	NA	NA	phosphate transporter	NA	NA	NA	K14640	NA	298.357	343.363	319.58	120.312	47.9716	63.6991	198.88	0.237075	-2.07659	0.308616	-6.7287	1.71186e-11	8.7144e-09	down
2681011	MGG_09988	MGG_09988T0	Glycosyl hydrolase family 43 protein [Source:UniProtKB/TrEMBL;Acc:G4N9M0]	glycosyl hydrolase family 43 protein	protein_coding	GO:0005975(carbohydrate metabolic process); GO:0016787(hydrolase activity); GO:0004553(hydrolase activity, hydrolyzing O-glycosyl compounds); GO:0005575(cellular_component); GO:0008152(metabolic process); GO:0016798(hydrolase activity, acting on glycosyl bonds)	NA	NA	NA	136.206	120.729	147.405	42.8228	22.3867	29.5746	83.1875	0.229963	-2.12053	0.315906	-6.71253	1.91282e-11	9.19641e-09	down
2680014	MGG_09095	MGG_09095T0	Alpha-L-arabinofuranosidase axhA-2 [Source:UniProtKB/TrEMBL;Acc:G4MZV0]	alpha-L-arabinofuranosidase axhA-2	protein_coding	GO:0046373(L-arabinose metabolic process); GO:0046556(alpha-L-arabinofuranosidase activity); GO:0005576(extracellular region); GO:0045493(xylan catabolic process)	NA	NA	NA	140.747	58.4172	169.758	10.1959	14.3915	13.6498	67.8598	0.104903	-3.25287	0.48897	-6.6525	2.88164e-11	1.31251e-08	down
5051413	MGG_14053	MGG_14053T0	Putative uncharacterized protein [Source:UniProtKB/TrEMBL;Acc:G4NL93]	uncharacterized protein	protein_coding	GO:0003674(molecular_function); GO:0008150(biological_process); GO:0005575(cellular_component)	NA	NA	NA	13.6206	33.1031	53.7667	199.84	180.693	225.222	117.708	6.01982	2.58972	0.396832	6.526	6.7551e-11	2.92293e-08	up
5048793	MGG_14232	MGG_14232T0	Nitrate reductase 1 [Source:UniProtKB/TrEMBL;Acc:G4NBV4]	nitrate reductase 1	protein_coding	GO:0046872(metal ion binding); GO:0009055(electron transfer activity); GO:0030151(molybdenum ion binding); GO:0016491(oxidoreductase activity); GO:0055114(oxidation-reduction process); GO:0005575(cellular_component)	00920(Sulfur metabolism)	K00387	ec:1.8.3.1	66.1574	92.1693	59.2038	0	0	0	36.2551	0.00392836	-7.99186	1.22974	-6.49881	8.09568e-11	3.33619e-08	down
2680259	MGG_09246	MGG_09246T0	Protease [Source:UniProtKB/TrEMBL;Acc:G4MQ68]	protease	protein_coding	GO:0006508(proteolysis); GO:0008236(serine-type peptidase activity); GO:0016787(hydrolase activity); GO:0004252(serine-type endopeptidase activity); GO:0008233(peptidase activity); GO:0005575(cellular_component)	NA	NA	NA	254.252	225.231	173.987	63.2147	51.1697	77.3489	140.867	0.296005	-1.75631	0.279894	-6.2749	3.49852e-10	1.37619e-07	down
2678945	MGG_08696	MGG_08696T0	Putative uncharacterized protein [Source:UniProtKB/TrEMBL;Acc:G4NFW0]	uncharacterized protein	protein_coding	GO:0003674(molecular_function); GO:0005575(cellular_component)	NA	NA	NA	108.965	65.5571	42.2884	2.03918	4.79716	6.82491	38.412	0.0676133	-3.88655	0.628285	-6.18597	6.17227e-10	2.32238e-07	down
2676725	MGG_03356	MGG_03356T0	Ricin B lectin:Parallel beta-helix [Source:UniProtKB/TrEMBL;Acc:G4N8Y3]	ricin B lectin:Parallel beta-helix	protein_coding	GO:0030246(carbohydrate binding); GO:0008150(biological_process); GO:0005575(cellular_component)	NA	NA	NA	92.75	97.362	105.721	14.2743	15.9905	30.7121	59.4683	0.21557	-2.21377	0.365599	-6.05519	1.40249e-09	5.05716e-07	down
2678529	MGG_08297	MGG_08297T0	NADH:flavin oxidoreductase/NADH oxidase [Source:UniProtKB/TrEMBL;Acc:G4MX78]	NADH:flavin oxidoreductase/NADH oxidase	protein_coding	GO:0003824(catalytic activity); GO:0016491(oxidoreductase activity); GO:0055114(oxidation-reduction process); GO:0010181(FMN binding); GO:0005575(cellular_component)	NA	K00354	ec:1.6.99.1	49.2937	85.6785	33.8308	161.095	546.876	318.496	199.212	6.09445	2.6075	0.43319	6.01929	1.75185e-09	5.83095e-07	up
2683134	MGG_07246	NA	NA	uncharacterized protein	NA	NA	NA	NA	NA	22.7011	26.6123	19.936	75.4497	81.5517	102.374	54.7707	3.77979	1.91831	0.318526	6.02245	1.71793e-09	5.83095e-07	up
2680839	MGG_09840	MGG_09840T0	Acetylxylan esterase 2 [Source:UniProtKB/TrEMBL;Acc:G4NIH2]	acetylxylan esterase 2	protein_coding	GO:0008152(metabolic process); GO:0016787(hydrolase activity); GO:0003674(molecular_function); GO:0008150(biological_process); GO:0005575(cellular_component)	NA	NA	NA	296.411	220.687	311.122	112.155	95.9431	87.5863	187.317	0.35433	-1.49684	0.249	-6.01138	1.83947e-09	5.89585e-07	down
2683339	MGG_07419	MGG_07419T0	Putative uncharacterized protein [Source:UniProtKB/TrEMBL;Acc:G4N0R4]	uncharacterized protein	protein_coding	GO:0046872(metal ion binding); GO:0008152(metabolic process); GO:0016491(oxidoreductase activity); GO:0055114(oxidation-reduction process)	00350(Tyrosine metabolism)	K00505	ec:1.14.18.1	297.708	260.93	229.566	110.116	59.1649	88.7238	174.368	0.32535	-1.61994	0.27018	-5.99576	2.02531e-09	6.25965e-07	down
2676570	MGG_03411	MGG_03411T0	Riboflavin transporter MCH5 [Source:UniProtKB/TrEMBL;Acc:G4N8L7]	riboflavin transporter MCH5	protein_coding	GO:0016021(integral component of membrane); GO:0043581(obsolete mycelium development); GO:0055085(transmembrane transport); GO:0016020(membrane); GO:0022857(transmembrane transporter activity)	NA	NA	NA	11.0262	20.1215	14.4989	57.0971	182.292	73.9365	59.8287	6.87449	2.78125	0.466524	5.96165	2.49699e-09	7.45137e-07	up
2677228	MGG_03817	MGG_03817T0	Metalloprotease 1 [Source:UniProtKB/TrEMBL;Acc:G4NHJ9]	metalloprotease 1	protein_coding	GO:0006508(proteolysis); GO:0008237(metallopeptidase activity); GO:0008233(peptidase activity)	NA	NA	NA	41.5105	81.135	54.3709	144.782	426.947	287.784	172.755	4.8681	2.28336	0.386396	5.90936	3.43429e-09	9.90679e-07	up
2681294	MGG_02224	MGG_02224T0	Putative uncharacterized protein [Source:UniProtKB/TrEMBL;Acc:G4MPM9]	uncharacterized protein	protein_coding	GO:0008150(biological_process); GO:0005575(cellular_component); GO:0005515(protein binding)	NA	NA	NA	112.208	111.642	87.5975	236.545	639.621	358.308	257.653	3.9696	1.989	0.339005	5.86715	4.43346e-09	1.23765e-06	up
2676306	MGG_14234	MGG_14234T0	Putative uncharacterized protein [Source:UniProtKB/TrEMBL;Acc:G4NBV3]	uncharacterized protein	protein_coding	NA	NA	NA	NA	52.5367	31.8049	50.7461	0	0	0	22.5146	0.00632119	-7.30559	1.24994	-5.84476	5.07312e-09	1.37196e-06	down
5049117	MGG_13252	MGG_13252T0	Extracellular metalloproteinase MEP [Source:UniProtKB/Swiss-Prot;Acc:A4QWP8]	extracellular elastinolytic metalloproteinase	protein_coding	GO:0003674(molecular_function); GO:0005575(cellular_component); GO:0046872(metal ion binding); GO:0016787(hydrolase activity); GO:0008233(peptidase activity); GO:0006508(proteolysis); GO:0008270(zinc ion binding); GO:0005576(extracellular region); GO:0004222(metalloendopeptidase activity); GO:0008237(metallopeptidase activity); GO:0005615(extracellular space)	NA	K01417	NA	533.799	526.404	603.517	183.526	263.844	261.621	395.452	0.428558	-1.22244	0.213038	-5.73811	9.57369e-09	2.51063e-06	down
2680847	MGG_09848	NA	NA	uncharacterized protein	NA	NA	NA	NA	NA	928.149	732.811	304.477	124.39	193.485	125.123	401.406	0.225399	-2.14945	0.375057	-5.731	9.9842e-09	2.54127e-06	down
2682006	MGG_10394	NA	NA	uncharacterized protein	NA	NA	NA	NA	NA	260.089	155.13	103.305	34.6661	39.9763	11.3748	100.757	0.161664	-2.62893	0.460362	-5.71058	1.12592e-08	2.78392e-06	down
2677541	MGG_04348	MGG_04348T0	Pectate lyase [Source:UniProtKB/TrEMBL;Acc:G4NGD2]	pectate lyase	protein_coding	GO:0005576(extracellular region); GO:0016829(lyase activity); GO:0000272(polysaccharide catabolic process); GO:0005975(carbohydrate metabolic process)	00040(Pentose and glucuronate interconversions)	K01728	ec:4.2.2.2	83.021	36.9975	68.2656	12.2351	1.59905	4.54994	34.4447	0.0906026	-3.4643	0.609747	-5.68154	1.33485e-08	3.20883e-06	down
2683075	MGG_07356	MGG_07356T0	Putative uncharacterized protein [Source:UniProtKB/TrEMBL;Acc:G4MVG3]	uncharacterized protein	protein_coding	NA	NA	NA	NA	251.009	177.848	131.094	50.9796	49.5706	17.0623	112.927	0.204675	-2.28859	0.403813	-5.66746	1.4493e-08	3.38978e-06	down
2681599	MGG_02502	MGG_02502T0	Putative uncharacterized protein [Source:UniProtKB/TrEMBL;Acc:G4MKA3]	uncharacterized protein	protein_coding	GO:0005576(extracellular region)	NA	NA	NA	71.9948	58.4172	66.4533	16.3135	9.59431	13.6498	39.4038	0.19907	-2.32865	0.414139	-5.62286	1.87819e-08	4.27734e-06	down
2676889	MGG_03338	MGG_03338T0	Cellulose-binding protein [Source:UniProtKB/TrEMBL;Acc:G4N951]	cellulose-binding protein	protein_coding	GO:0016787(hydrolase activity); GO:0005575(cellular_component)	NA	NA	NA	62.9143	33.7521	68.2656	6.11755	0	6.82491	29.6458	0.0806436	-3.6323	0.6499	-5.58901	2.28365e-08	5.06737e-06	down
2675222	MGG_00311	MGG_00311T0	Putative uncharacterized protein [Source:UniProtKB/TrEMBL;Acc:G4ND02]	uncharacterized protein	protein_coding	GO:0006508(proteolysis); GO:0052051(obsolete interaction with host via protein secreted by type II secretion system); GO:0004190(aspartic-type endopeptidase activity); GO:0005575(cellular_component)	NA	NA	NA	7.78322	15.5779	22.3525	67.293	147.113	62.5616	53.7802	6.03651	2.59371	0.46497	5.57824	2.42971e-08	5.25667e-06	up
2676303	MGG_10791	MGG_10791T0	Putative uncharacterized protein [Source:UniProtKB/TrEMBL;Acc:G4NBV1]	uncharacterized protein	protein_coding	GO:0003674(molecular_function); GO:0008150(biological_process); GO:0005575(cellular_component)	NA	NA	NA	29.1871	35.6994	41.6843	0	0	0	17.7618	0.00801118	-6.96377	1.2544	-5.55146	2.83292e-08	5.97953e-06	down
2679166	MGG_01692	MGG_01692T0	Putative uncharacterized protein [Source:UniProtKB/TrEMBL;Acc:G4MUU6]	uncharacterized protein	protein_coding	GO:0005575(cellular_component); GO:0008270(zinc ion binding); GO:0004089(carbonate dehydratase activity)	NA	NA	NA	588.93	645.834	714.071	287.525	335.801	328.733	483.482	0.489541	-1.0305	0.187275	-5.5026	3.74228e-08	7.71088e-06	down
2675666	MGG_05045	MGG_05045T0	GTP cyclohydrolase I [Source:UniProtKB/TrEMBL;Acc:G4N427]	GTP cyclohydrolase I	protein_coding	GO:0005737(cytoplasm); GO:0016787(hydrolase activity); GO:0046654(tetrahydrofolate biosynthetic process); GO:0003934(GTP cyclohydrolase I activity); GO:0003674(molecular_function); GO:0008150(biological_process); GO:0005575(cellular_component); GO:0035998(7,8-dihydroneopterin 3'-triphosphate biosynthetic process)	00790(Folate biosynthesis); 01240(Biosynthesis of cofactors)	K01495	ec:3.5.4.16	3.24301	0	1.20824	22.431	52.7687	19.3372	16.498	21.2413	4.4088	0.803164	5.48929	4.03549e-08	8.12166e-06	up
2680482	MGG_09527	NA	NA	uncharacterized protein	NA	NA	NA	NA	NA	876.261	893.783	783.545	1498.8	2401.78	1893.91	1391.35	2.27029	1.18287	0.215772	5.48205	4.20418e-08	8.26886e-06	up
2677127	MGG_04203	MGG_04203T0	4-coumarate-CoA ligase [Source:UniProtKB/TrEMBL;Acc:G4NF73]	4-coumarate-CoA ligase	protein_coding	GO:0008152(metabolic process); GO:0003824(catalytic activity); GO:0016874(ligase activity); GO:0016020(membrane); GO:0016021(integral component of membrane)	00130(Ubiquinone and other terpenoid-quinone biosynthesis)	K01904	ec:6.2.1.12	238.037	223.933	215.671	393.562	546.876	575.567	365.608	2.24454	1.16642	0.213502	5.46327	4.67436e-08	8.98931e-06	up
2676260	MGG_10730	NA	NA	potassium/sodium efflux P-type ATPase	NA	NA	NA	K01536	ec:7.2.2.3	641.467	327.785	225.941	95.8416	119.929	60.2867	245.208	0.229715	-2.12208	0.392935	-5.4006	6.64187e-08	1.24954e-05	down
2678504	MGG_08370	MGG_08370T0	1,3-beta-glucanosyltransferase gel3 [Source:UniProtKB/TrEMBL;Acc:G4MWC3]	1,3-beta-glucanosyltransferase gel3	protein_coding	GO:0043581(obsolete mycelium development); GO:0005975(carbohydrate metabolic process); GO:0005886(plasma membrane); GO:0016740(transferase activity); GO:0003824(catalytic activity); GO:0031225(anchored component of membrane); GO:0043169(cation binding); GO:0005575(cellular_component); GO:0016020(membrane); GO:0016021(integral component of membrane)	NA	K22832	NA	106.371	86.3276	97.8676	258.976	247.853	191.097	164.749	2.39009	1.25706	0.233194	5.39063	7.02104e-08	1.29277e-05	up
12987277	MGG_14954	MGG_14954T0	Endoglucanase 1 [Source:UniProtKB/TrEMBL;Acc:G4NI68]	endoglucanase 1	protein_coding	GO:0005975(carbohydrate metabolic process); GO:0004553(hydrolase activity, hydrolyzing O-glycosyl compounds); GO:0030245(cellulose catabolic process); GO:0016787(hydrolase activity); GO:0008152(metabolic process); GO:0016798(hydrolase activity, acting on glycosyl bonds); GO:0000272(polysaccharide catabolic process)	00500(Starch and sucrose metabolism)	K19357	ec:3.2.1.4	111.559	35.6994	83.9728	0	12.7924	10.2374	42.3769	0.10583	-3.24018	0.606002	-5.34681	8.95167e-08	1.61391e-05	down
2674918	MGG_00618	MGG_00618T0	Pectinesterase [Source:UniProtKB/TrEMBL;Acc:G4NB63]	pectinesterase	protein_coding	GO:0052051(obsolete interaction with host via protein secreted by type II secretion system); GO:0016787(hydrolase activity); GO:0005618(cell wall); GO:0042545(cell wall modification); GO:0030599(pectinesterase activity); GO:0045330(aspartyl esterase activity); GO:0005576(extracellular region); GO:0071555(cell wall organization); GO:0045490(pectin catabolic process)	00040(Pentose and glucuronate interconversions)	K01051	ec:3.1.1.11	53.8339	35.6994	71.2862	12.2351	3.1981	4.54994	30.1338	0.115621	-3.11252	0.582795	-5.34068	9.25992e-08	1.63542e-05	down
2675596	MGG_05247	MGG_05247T0	NAD-specific glutamate dehydrogenase [Source:UniProtKB/TrEMBL;Acc:G4N5E0]	NAD-specific glutamate dehydrogenase	protein_coding	GO:0005739(mitochondrion); GO:0000166(nucleotide binding); GO:0016491(oxidoreductase activity); GO:0004352(glutamate dehydrogenase (NAD+) activity); GO:0055114(oxidation-reduction process); GO:0006520(cellular amino acid metabolic process); GO:0019551(glutamate catabolic process to 2-oxoglutarate); GO:0005575(cellular_component)	00220(Arginine biosynthesis); 00250(Alanine, aspartate and glutamate metabolism); 00430(Taurine and hypotaurine metabolism); 00910(Nitrogen metabolism)	K15371	ec:1.4.1.2	1877.05	2282.81	1889.69	3658.29	4466.15	3669.52	2973.92	1.9496	0.963175	0.180762	5.32842	9.90691e-08	1.71469e-05	none
2681224	MGG_02069	MGG_02069T0	Glyoxalase/bleomycin resistance protein/dioxygenase [Source:UniProtKB/TrEMBL;Acc:G4MN98]	glyoxalase/bleomycin resistance protein/dioxygenase	protein_coding	GO:0016702(oxidoreductase activity, acting on single donors with incorporation of molecular oxygen, incorporation of two atoms of oxygen); GO:0051213(dioxygenase activity); GO:0008150(biological_process); GO:0005575(cellular_component); GO:0055114(oxidation-reduction process)	NA	NA	NA	25.2955	42.8393	27.1854	101.959	118.33	88.7238	67.3888	3.23545	1.69397	0.320313	5.28848	1.23338e-07	2.09288e-05	up
2683882	MGG_07955	MGG_07955T0	Endo-1,4-beta-xylanase 22 [Source:UniProtKB/Swiss-Prot;Acc:P55335]	endo-1,4-beta-xylanase I	protein_coding	GO:0005575(cellular_component); GO:0016787(hydrolase activity); GO:0005576(extracellular region); GO:0008152(metabolic process); GO:0004553(hydrolase activity, hydrolyzing O-glycosyl compounds); GO:0005975(carbohydrate metabolic process); GO:0016798(hydrolase activity, acting on glycosyl bonds); GO:0031176(endo-1,4-beta-xylanase activity); GO:0000272(polysaccharide catabolic process); GO:0045493(…	NA	K01181	ec:3.2.1.8	68.1032	27.2613	13.2907	0	0	0	18.1092	0.00786811	-6.98977	1.34258	-5.20624	1.92707e-07	3.20708e-05	down
12985864	MGG_15048	NA	NA	NAD-dependent deacetylase sirtuin-5	NA	NA	00760(Nicotinate and nicotinamide metabolism)	K11415	ec:2.3.1.286	137.504	93.4675	96.6593	201.879	508.499	368.545	234.425	3.30154	1.72314	0.332086	5.18883	2.11619e-07	3.45539e-05	up
2678934	MGG_08752	NA	NA	exopolygalacturonase	NA	NA	00040(Pentose and glucuronate interconversions)	K01213	ec:3.2.1.67	68.7518	44.7865	71.2862	12.2351	12.7924	13.6498	37.2503	0.210561	-2.24769	0.437499	-5.13759	2.78283e-07	4.45975e-05	down
2676869	MGG_03326	MGG_03326T0	Putative uncharacterized protein [Source:UniProtKB/TrEMBL;Acc:G4N966]	uncharacterized protein	protein_coding	GO:0003674(molecular_function); GO:0008150(biological_process); GO:0005575(cellular_component)	NA	NA	NA	1100.68	865.872	841.54	528.148	375.777	400.394	685.402	0.463209	-1.11027	0.217197	-5.11178	3.19132e-07	5.02139e-05	down
2682907	MGG_14292	MGG_14292T0	Leupeptin-inactivating enzyme 1 [Source:UniProtKB/TrEMBL;Acc:G4NIB4]	leupeptin-inactivating enzyme 1	protein_coding	GO:0006508(proteolysis); GO:0005509(calcium ion binding); GO:0016020(membrane); GO:0008233(peptidase activity); GO:0004571(mannosyl-oligosaccharide 1,2-alpha-mannosidase activity); GO:0046872(metal ion binding); GO:0016787(hydrolase activity); GO:0004177(aminopeptidase activity)	NA	NA	NA	315.869	317.4	277.291	161.095	123.127	147.873	223.776	0.473597	-1.07827	0.213903	-5.04091	4.63323e-07	7.15999e-05	down
2677490	MGG_03914	MGG_03914T1; MGG_03914T0	Putative uncharacterized protein [Source:UniProtKB/TrEMBL;Acc:G4NH79]	hypothetical protein, variant; uncharacterized protein	protein_coding	GO:0044271(cellular nitrogen compound biosynthetic process); GO:0003674(molecular_function); GO:0005575(cellular_component)	NA	NA	NA	119.991	157.077	134.115	261.015	759.55	378.782	301.755	3.40614	1.76814	0.353344	5.00402	5.61479e-07	8.52463e-05	up
2679746	MGG_01532	MGG_01532T0	Putative uncharacterized protein [Source:UniProtKB/TrEMBL;Acc:G4MTE7]	uncharacterized protein	protein_coding	GO:0003674(molecular_function); GO:0008150(biological_process); GO:0005575(cellular_component)	NA	NA	NA	858.1	401.131	423.489	234.506	143.915	104.649	360.965	0.28495	-1.81122	0.365635	-4.95363	7.28404e-07	0.000108683	down
2678752	MGG_08454	NA	NA	elicitor	NA	NA	NA	NA	NA	251.009	158.375	145.593	48.9404	78.3536	59.1492	123.57	0.337353	-1.56767	0.317621	-4.93567	7.98767e-07	0.000117162	down
2675961	MGG_05433	MGG_05433T0	Solute carrier family 6 protein [Source:UniProtKB/TrEMBL;Acc:G4MLQ3]	solute carrier family 6 protein	protein_coding	GO:0016021(integral component of membrane); GO:0006810(transport); GO:0005328; GO:0016020(membrane); GO:0055085(transmembrane transport); GO:0015293(symporter activity)	NA	K05034	NA	371.649	325.189	159.488	73.4106	111.934	78.4864	186.693	0.308391	-1.69717	0.345462	-4.91274	8.9813e-07	0.000128579	down
2680204	MGG_09314	NA	NA	lipolytic enzyme	NA	NA	NA	NA	NA	53.8339	61.0135	77.9316	10.1959	3.1981	20.4747	37.7746	0.18529	-2.43214	0.495248	-4.91096	9.06325e-07	0.000128579	down
2675779	MGG_12979	MGG_12979T0	Putative uncharacterized protein [Source:UniProtKB/TrEMBL;Acc:G4N2A6]	uncharacterized protein	protein_coding	GO:0003674(molecular_function); GO:0005575(cellular_component)	NA	NA	NA	134.261	116.834	182.444	65.2538	46.3725	43.2244	98.065	0.351689	-1.50763	0.30888	-4.88096	1.05572e-06	0.000147358	down
2681341	MGG_02244	MGG_02244T1; MGG_02244T0	Glutathione S-transferase Gst3 [Source:UniProtKB/TrEMBL;Acc:G4MPQ3]	glutathione S-transferase Gst3; glutathione S-transferase Gst3, variant	protein_coding	GO:0016740(transferase activity); GO:0003674(molecular_function); GO:0008150(biological_process); GO:0005575(cellular_component); GO:0004364(glutathione transferase activity); GO:0005515(protein binding)	NA	K07393	ec:1.8.5.7	37.6189	24.665	32.6225	91.7632	102.339	77.3489	61.0597	2.84748	1.50969	0.309832	4.87259	1.10146e-06	0.000151302	up
5051011	MGG_14767	MGG_14767T0	Non-ribosomal peptide synthetase [Source:UniProtKB/TrEMBL;Acc:G4MW47]	non-ribosomal peptide synthetase	protein_coding	GO:0008152(metabolic process); GO:0003824(catalytic activity); GO:0016874(ligase activity); GO:0048037(obsolete cofactor binding); GO:0031177(phosphopantetheine binding)	NA	K22152	NA	9.72902	14.9288	4.22884	28.5486	103.938	52.3243	35.6163	6.44815	2.68888	0.553193	4.86066	1.16994e-06	0.000158198	up
2678777	MGG_08486	MGG_08486T0	Beta-lactamase [Source:UniProtKB/TrEMBL;Acc:G4NAN2]	beta-lactamase	protein_coding	GO:0005575(cellular_component)	NA	NA	NA	178.365	178.497	167.341	75.4497	68.7593	88.7238	126.189	0.447604	-1.15971	0.240173	-4.82862	1.37484e-06	0.000183044	down
2684094	MGG_05881	MGG_05881T0	Putative uncharacterized protein [Source:UniProtKB/TrEMBL;Acc:G4N3Y0]	uncharacterized protein	protein_coding	GO:0043581(obsolete mycelium development); GO:0003674(molecular_function); GO:0005575(cellular_component)	NA	NA	NA	5.18881	7.78896	6.64533	18.3526	60.764	37.537	22.7128	6.0002	2.58501	0.537076	4.81312	1.48592e-06	0.000183702	up
12984553	MGG_16187	NA	NA	uncharacterized protein	NA	NA	NA	NA	NA	339.867	390.746	402.948	766.733	745.158	616.516	543.662	1.87413	0.906218	0.188144	4.81663	1.46004e-06	0.000183702	none
2675281	MGG_05092	MGG_05092T0	Putative uncharacterized protein [Source:UniProtKB/TrEMBL;Acc:G4N4D9]	uncharacterized protein	protein_coding	NA	NA	NA	NA	776.376	575.734	363.681	261.015	156.707	106.924	373.406	0.303393	-1.72074	0.35745	-4.81393	1.47994e-06	0.000183702	down
2678572	MGG_08315	MGG_08315T0	1-phosphatidylinositol-4,5-bisphosphate phosphodiesterase delta-1 [Source:UniProtKB/TrEMBL;Acc:G4MWU9]	1-phosphatidylinositol-4,5-bisphosphate phosphodiesterase delta-1	protein_coding	GO:0016042(lipid catabolic process); GO:0004871(obsolete signal transducer activity); GO:0006629(lipid metabolic process); GO:0005622(intracellular); GO:0007165(signal transduction); GO:0008081(phosphoric diester hydrolase activity); GO:0035556(intracellular signal transduction); GO:0004435(phosphatidylinositol phospholipase C activity); GO:0005575(cellular_component); GO:0016787(hydrolase activi…	NA	NA	NA	74.5892	36.3485	41.0802	14.2743	4.79716	4.54994	29.2732	0.144674	-2.78912	0.578131	-4.82437	1.40444e-06	0.000183702	down
2677769	MGG_04547	MGG_04547T0	Endoglucanase II [Source:UniProtKB/TrEMBL;Acc:G4MS66]	endoglucanase II	protein_coding	GO:0005576(extracellular region)	NA	NA	NA	47.9965	35.0503	34.4349	0	4.79716	7.96239	21.7069	0.122867	-3.02483	0.62746	-4.82076	1.43014e-06	0.000183702	down
2676304	MGG_10792	NA	NA	uncharacterized protein	NA	NA	NA	K00480	ec:1.14.13.1	14.9178	26.6123	21.7483	0	0	0	10.5464	0.0134978	-6.21113	1.30183	-4.77107	1.83254e-06	0.000223364	down
2684756	MGG_06601	MGG_06601T0	Putative uncharacterized protein [Source:UniProtKB/TrEMBL;Acc:G4N686]	uncharacterized protein	protein_coding	GO:0043581(obsolete mycelium development); GO:0003674(molecular_function); GO:0005575(cellular_component)	NA	NA	NA	62.9143	73.346	39.872	128.468	206.278	149.01	109.982	2.75375	1.4614	0.312492	4.6766	2.91666e-06	0.000350566	up
2680690	MGG_09736	NA	NA	uncharacterized protein	NA	NA	NA	NA	NA	260.738	276.508	300.852	601.559	714.776	441.344	432.629	2.09296	1.06554	0.228317	4.66694	3.05718e-06	0.000361558	up
2683415	MGG_13404	NA	NA	3-oxoacyl	NA	NA	00061(Fatty acid biosynthesis); 00780(Biotin metabolism); 01212(Fatty acid metabolism); 01240(Biosynthesis of cofactors)	K00059	ec:1.1.1.100	222.47	203.811	167.946	106.037	81.5517	76.2114	143.005	0.439381	-1.18645	0.254351	-4.66463	3.09167e-06	0.000361558	down
2677208	MGG_04225	MGG_04225T0	MFS quinate transporter [Source:UniProtKB/TrEMBL;Acc:G4NFC7]	MFS quinate transporter	protein_coding	GO:0016021(integral component of membrane); GO:0006810(transport); GO:0055085(transmembrane transport); GO:0016020(membrane); GO:0005215(transporter activity); GO:0022891(GO_0022891); GO:0022857(transmembrane transporter activity)	NA	NA	NA	261.386	260.93	264.605	103.998	148.712	133.086	195.453	0.493246	-1.01962	0.219829	-4.63825	3.51366e-06	0.000405429	down
2678467	MGG_08331	MGG_08331T0	Endo-1,4-beta-xylanase B [Source:UniProtKB/TrEMBL;Acc:G4MWS3]	endo-1,4-beta-xylanase B	protein_coding	GO:0005975(carbohydrate metabolic process); GO:0008152(metabolic process); GO:0031176(endo-1,4-beta-xylanase activity); GO:0045493(xylan catabolic process); GO:0016787(hydrolase activity); GO:0004553(hydrolase activity, hydrolyzing O-glycosyl compounds); GO:0016798(hydrolase activity, acting on glycosyl bonds)	NA	K01181	ec:3.2.1.8	46.6993	19.4724	38.6637	0	0	4.54994	18.2309	0.054554	-4.19617	0.906301	-4.63	3.65672e-06	0.000416385	down
12985865	MGG_15049	NA	NA	uncharacterized protein	NA	NA	NA	NA	NA	5.83741	9.08712	5.43709	30.5877	47.9716	25.0247	20.6576	5.07034	2.34208	0.50801	4.61031	4.02072e-06	0.000451887	up
2683546	MGG_07626	MGG_07626T0	Cytochrome P450 monooxygenase [Source:UniProtKB/TrEMBL;Acc:G4N2Y3]	cytochrome P450 monooxygenase	protein_coding	GO:0046872(metal ion binding); GO:0009055(electron transfer activity); GO:0020037(heme binding); GO:0005506(iron ion binding); GO:0016020(membrane); GO:0016491(oxidoreductase activity); GO:0055114(oxidation-reduction process); GO:0004497(monooxygenase activity); GO:0016705(oxidoreductase activity, acting on paired donors, with incorporation or reduction of molecular oxygen); GO:0016021(integral c…	NA	NA	NA	127.775	234.318	88.8057	289.564	622.031	606.279	328.129	3.37358	1.75428	0.381075	4.60351	4.15428e-06	0.000460913	up
2674320	MGG_00777	MGG_00777T0	Putative uncharacterized protein [Source:UniProtKB/TrEMBL;Acc:G4NEK2]	uncharacterized protein	protein_coding	GO:0003674(molecular_function); GO:0008150(biological_process); GO:0005575(cellular_component)	NA	NA	NA	321.706	276.508	193.319	674.969	556.47	502.768	420.957	2.18784	1.1295	0.245613	4.59872	4.25097e-06	0.000465669	up
2684101	MGG_05874	MGG_05874T0	Putative uncharacterized protein [Source:UniProtKB/TrEMBL;Acc:G4N3S1]	uncharacterized protein	protein_coding	GO:0003674(molecular_function); GO:0005575(cellular_component)	NA	NA	NA	276.953	213.547	214.463	126.429	100.74	64.8366	166.162	0.407977	-1.29344	0.285867	-4.52461	6.05062e-06	0.000654526	down
2678983	MGG_08817	NA	NA	uncharacterized protein	NA	NA	NA	NA	NA	25.2955	27.2613	47.1214	106.037	70.3583	143.323	69.8995	3.21867	1.68646	0.373251	4.51831	6.23342e-06	0.000665975	up
2674621	MGG_00205	MGG_00205T0	Putative uncharacterized protein [Source:UniProtKB/TrEMBL;Acc:G4NDU3]	uncharacterized protein	protein_coding	GO:0003674(molecular_function); GO:0008150(biological_process); GO:0005575(cellular_component); GO:0016020(membrane); GO:0016021(integral component of membrane)	NA	NA	NA	104.425	114.238	122.636	32.6269	35.1792	58.0117	77.8529	0.378034	-1.40341	0.311727	-4.50206	6.72971e-06	0.00071023	down
2679744	MGG_01530	MGG_01530T0	Putative uncharacterized protein [Source:UniProtKB/TrEMBL;Acc:G4MTE5]	uncharacterized protein	protein_coding	GO:0003674(molecular_function); GO:0008150(biological_process); GO:0005575(cellular_component)	NA	NA	NA	42.8077	28.5595	27.1854	2.03918	7.99526	1.13748	18.2874	0.109181	-3.19521	0.713019	-4.48125	7.42084e-06	0.000773735	down
2675088	MGG_00578	MGG_00578T0	Putative uncharacterized protein [Source:UniProtKB/TrEMBL;Acc:G4NBC1]	uncharacterized protein	protein_coding	GO:0008233(peptidase activity); GO:0008150(biological_process); GO:0005575(cellular_component); GO:0016787(hydrolase activity)	NA	NA	NA	61.6171	38.2957	27.7896	12.2351	4.79716	4.54994	24.8808	0.158817	-2.65456	0.595094	-4.46075	8.16736e-06	0.000841432	down
2682221	MGG_10618	MGG_10618T0	Acetyl xylan esterase [Source:UniProtKB/TrEMBL;Acc:G4MQB7]	acetyl xylan esterase	protein_coding	GO:0005576(extracellular region); GO:0008150(biological_process); GO:0016787(hydrolase activity); GO:0052689(carboxylic ester hydrolase activity)	NA	K05972	ec:3.1.1.72	32.4301	27.2613	55.5791	0	1.59905	9.09987	20.9949	0.108842	-3.1997	0.718079	-4.45591	8.35378e-06	0.000850514	down
2682864	MGG_02648	MGG_02648T0	Interferon-induced GTP-binding protein Mx [Source:UniProtKB/TrEMBL;Acc:G4NJH9]	interferon-induced GTP-binding protein Mx	protein_coding	GO:0000166(nucleotide binding); GO:0005525(GTP binding); GO:0003924(GTPase activity); GO:0006184(obsolete GTP catabolic process)	NA	NA	NA	26.5927	46.7337	11.4783	57.0971	300.622	120.573	93.8495	5.65631	2.49986	0.562775	4.44202	8.91169e-06	0.000896765	up
2683714	MGG_07787	NA	NA	uncharacterized protein	NA	NA	NA	NA	NA	1251.8	1221.57	994.987	672.93	684.394	657.466	913.858	0.580822	-0.783831	0.177637	-4.41255	1.02161e-05	0.00101621	none
2679115	MGG_01641	MGG_01641T0	Putative uncharacterized protein [Source:UniProtKB/TrEMBL;Acc:G4MUD5]	uncharacterized protein	protein_coding	GO:0003677(DNA binding); GO:0005634(nucleus); GO:0005515(protein binding)	NA	NA	NA	123.234	125.272	107.533	205.957	275.037	221.809	176.474	1.97649	0.982943	0.223165	4.40455	1.06002e-05	0.00104243	none
2675416	MGG_04913	MGG_04913T0	Putative uncharacterized protein [Source:UniProtKB/TrEMBL;Acc:G4N340]	uncharacterized protein	protein_coding	GO:0003674(molecular_function); GO:0008150(biological_process); GO:0005575(cellular_component); GO:0043495(protein-membrane adaptor activity)	NA	NA	NA	1214.83	1368.26	878.391	401.719	658.81	538.03	843.34	0.46252	-1.11241	0.25313	-4.39462	1.10966e-05	0.00107899	down
2683986	MGG_05989	MGG_05989T0	Seprase [Source:UniProtKB/TrEMBL;Acc:G4N4L1]	seprase	protein_coding	GO:0006508(proteolysis); GO:0008236(serine-type peptidase activity); GO:0016020(membrane); GO:0016021(integral component of membrane); GO:0004177(aminopeptidase activity); GO:0005773(vacuole); GO:0005774(vacuolar membrane)	NA	NA	NA	842.533	746.442	718.299	485.325	409.357	443.619	607.596	0.579367	-0.78745	0.179424	-4.38877	1.13996e-05	0.00109614	none
2679979	MGG_08994	NA	NA	uncharacterized protein	NA	NA	NA	NA	NA	444.941	89.573	347.974	95.8416	62.363	42.0869	180.463	0.224711	-2.15385	0.491149	-4.38534	1.15805e-05	0.00110129	down
12985775	MGG_18017	MGG_18017T0	Putative uncharacterized protein [Source:UniProtKB/TrEMBL;Acc:G4NJP0]	uncharacterized protein	NA	NA	00910(Nitrogen metabolism)	K01673	ec:4.2.1.1	217.93	299.875	279.708	93.8024	137.519	137.636	194.412	0.466414	-1.10032	0.251508	-4.37487	1.21505e-05	0.00114294	down
2680890	MGG_09920	NA	NA	cytochrome P450 52A5	NA	NA	NA	NA	NA	143.99	86.9767	71.2862	197.801	251.051	424.282	195.898	2.90327	1.53768	0.351746	4.37156	1.23363e-05	0.00114794	up
2685024	MGG_06851	NA	NA	uncharacterized protein	NA	NA	NA	NA	NA	88.8584	98.011	84.5769	18.3526	33.5801	42.0869	60.911	0.357981	-1.48204	0.339253	-4.36855	1.25075e-05	0.00115149	down
2684186	MGG_05789	MGG_05789T0	Putative uncharacterized protein [Source:UniProtKB/TrEMBL;Acc:G4N0V3]	uncharacterized protein	protein_coding	GO:0003674(molecular_function); GO:0008150(biological_process); GO:0005575(cellular_component)	NA	NA	NA	1.9458	6.4908	8.45769	87.6848	19.1886	23.8872	24.6092	7.57929	2.92206	0.675629	4.32495	1.52564e-05	0.00138072	up
5050917	MGG_12316	MGG_12316T0	Putative uncharacterized protein [Source:UniProtKB/TrEMBL;Acc:G4MZA8]	uncharacterized protein	protein_coding	GO:0003674(molecular_function); GO:0008150(biological_process); GO:0005575(cellular_component)	NA	NA	NA	2717.64	3805.55	2292.03	4582.04	8150.37	7226.44	4795.68	2.26455	1.17923	0.272856	4.3218	1.54761e-05	0.00138072	up
2683497	MGG_07577	MGG_07577T0	Putative uncharacterized protein [Source:UniProtKB/TrEMBL;Acc:G4N2H7]	uncharacterized protein	protein_coding	GO:0003674(molecular_function); GO:0008150(biological_process); GO:0005575(cellular_component)	NA	NA	NA	230.254	282.35	201.172	124.39	119.929	78.4864	172.763	0.447526	-1.15996	0.268327	-4.32292	1.53975e-05	0.00138072	down
2681012	MGG_13626	MGG_13626T0	Alpha-galactosidase [Source:UniProtKB/TrEMBL;Acc:G4N9L9]	alpha-galactosidase	protein_coding	GO:0005975(carbohydrate metabolic process); GO:0008152(metabolic process); GO:0016787(hydrolase activity); GO:0003824(catalytic activity); GO:0052692(raffinose alpha-galactosidase activity); GO:0004553(hydrolase activity, hydrolyzing O-glycosyl compounds); GO:0043169(cation binding); GO:0016798(hydrolase activity, acting on glycosyl bonds); GO:0005575(cellular_component); GO:0004557(alpha-galacto…	00052(Galactose metabolism); 00561(Glycerolipid metabolism); 00600(Sphingolipid metabolism); 00603(Glycosphingolipid biosynthesis - globo and isoglobo series)	K07407	ec:3.2.1.22	55.7797	104.502	109.346	34.6661	23.9858	27.2996	59.2632	0.315641	-1.66364	0.385477	-4.31581	1.59017e-05	0.00140422	down
2681340	MGG_02243	MGG_02243T0	Amidohydrolase [Source:UniProtKB/TrEMBL;Acc:G4MPQ2]	amidohydrolase	protein_coding	GO:0043581(obsolete mycelium development); GO:0016787(hydrolase activity); GO:0016810(hydrolase activity, acting on carbon-nitrogen (but not peptide) bonds); GO:0008150(biological_process); GO:0005575(cellular_component)	NA	NA	NA	70.6976	58.4172	72.4945	106.037	169.5	201.335	113.08	2.38607	1.25463	0.291681	4.30139	1.69728e-05	0.00148367	up
2676149	MGG_05344	MGG_05344T0	SnodProt1 [Source:UniProtKB/TrEMBL;Acc:G4MKI0]	SnodProt1	protein_coding	GO:0052051(obsolete interaction with host via protein secreted by type II secretion system); GO:0003674(molecular_function); GO:0005575(cellular_component); GO:0005576(extracellular region); GO:0009405(pathogenesis)	NA	NA	NA	442.346	458.899	456.715	815.673	965.828	669.978	634.907	1.80308	0.850464	0.198179	4.2914	1.7755e-05	0.00153651	none
2685123	MGG_06950	NA	NA	L-serine dehydratase	NA	NA	00260(Glycine, serine and threonine metabolism); 00270(Cysteine and methionine metabolism); 00290(Valine, leucine and isoleucine biosynthesis); 01230(Biosynthesis of amino acids)	K17989	ec:4.3.1.17	531.853	741.898	595.059	1074.65	1274.44	1053.31	878.536	1.8205	0.864338	0.201691	4.28545	1.82366e-05	0.00154725	none
2683121	MGG_07233	MGG_07233T0	Putative uncharacterized protein [Source:UniProtKB/TrEMBL;Acc:G4MU45]	uncharacterized protein	protein_coding	GO:0043581(obsolete mycelium development); GO:0055085(transmembrane transport); GO:0008324(cation transmembrane transporter activity); GO:0006812(cation transport); GO:0005575(cellular_component); GO:0016020(membrane); GO:0016021(integral component of membrane); GO:0098655(cation transmembrane transport); GO:0006811(ion transport)	NA	K24976	NA	94.6958	86.9767	100.284	42.8228	35.1792	39.8119	66.6284	0.416551	-1.26344	0.294729	-4.28677	1.8129e-05	0.00154725	down
2679051	MGG_08622	NA	NA	nucleoside diphosphate kinase	NA	NA	00230(Purine metabolism); 00240(Pyrimidine metabolism); 01240(Biosynthesis of cofactors)	K00940	ec:2.7.4.6	985.874	1057.35	1050.57	703.518	465.324	506.181	794.802	0.539859	-0.889345	0.208877	-4.25774	2.06505e-05	0.00173504	none
2676046	MGG_05401	MGG_05401T0	Bifunctional P-450:NADPH-P450 reductase [Source:UniProtKB/TrEMBL;Acc:G4MLB6]	bifunctional P-450:NADPH-P450 reductase	protein_coding	GO:0009055(electron transfer activity); GO:0020037(heme binding); GO:0005506(iron ion binding); GO:0016491(oxidoreductase activity); GO:0055114(oxidation-reduction process); GO:0003958(NADPH-hemoprotein reductase activity); GO:0016705(oxidoreductase activity, acting on paired donors, with incorporation or reduction of molecular oxygen); GO:0010181(FMN binding); GO:0070330(aromatase activity); GO:…	00071(Fatty acid degradation); 00380(Tryptophan metabolism)	K14338	ec:1.14.14.1	18.1608	24.016	18.1236	42.8228	52.7687	116.023	45.3192	3.57116	1.83639	0.431811	4.25277	2.11146e-05	0.00174025	up
2681437	MGG_02340	MGG_02340T0	Cell wall glycosyl hydrolase YteR [Source:UniProtKB/TrEMBL;Acc:G4MQK5]	cell wall glycosyl hydrolase YteR	protein_coding	GO:0008152(metabolic process); GO:0016787(hydrolase activity); GO:0003824(catalytic activity); GO:0005575(cellular_component)	NA	NA	NA	76.535	60.3644	142.572	14.2743	27.1839	32.987	58.9862	0.273145	-1.87226	0.44021	-4.25311	2.1082e-05	0.00174025	down
2678187	MGG_04689	MGG_04689T0	Glucan 1,3-beta-glucosidase [Source:UniProtKB/TrEMBL;Acc:G4MRA6]	glucan 1,3-beta-glucosidase	protein_coding	GO:0043581(obsolete mycelium development); GO:0005975(carbohydrate metabolic process); GO:0008152(metabolic process); GO:0016787(hydrolase activity); GO:0003824(catalytic activity); GO:0004553(hydrolase activity, hydrolyzing O-glycosyl compounds); GO:0043169(cation binding); GO:0016798(hydrolase activity, acting on glycosyl bonds); GO:0016020(membrane); GO:0016021(integral component of membrane);…	00500(Starch and sucrose metabolism)	K01199	ec:3.2.1.39	740.054	660.114	638.556	1082.81	1168.91	1063.55	892.331	1.62603	0.701357	0.165242	4.24442	2.19158e-05	0.00178924	none
2677569	MGG_04234	MGG_04234T0	Hexose transporter [Source:UniProtKB/TrEMBL;Acc:G4NFB9]	hexose transporter	protein_coding	GO:0016021(integral component of membrane); GO:0006810(transport); GO:0055085(transmembrane transport); GO:0016020(membrane); GO:0022891(GO_0022891); GO:0022857(transmembrane transporter activity)	NA	NA	NA	159.556	45.4356	13.8948	0	0	0	36.4811	0.00390291	-8.00124	1.89729	-4.2172	2.47355e-05	0.00200057	down
2680961	MGG_13629	NA	NA	fungal specific transcription factor domain-containing protein	NA	NA	NA	NA	NA	49.9423	40.2429	39.872	87.6848	111.934	94.4112	70.6812	2.26514	1.1796	0.280253	4.20904	2.56456e-05	0.00203612	up
5050765	MGG_11605	MGG_11605T0	Putative uncharacterized protein [Source:UniProtKB/TrEMBL;Acc:G4ND14]	uncharacterized protein	protein_coding	NA	NA	NA	NA	152.421	90.8712	97.2634	50.9796	44.7735	26.1621	77.0785	0.350414	-1.51287	0.359366	-4.20982	2.55571e-05	0.00203612	down
2683559	MGG_07639	NA	NA	excitatory amino acid transporter 2	NA	NA	NA	NA	NA	509.152	320.645	90.014	22.431	49.5706	19.3372	168.525	0.0991706	-3.33394	0.793697	-4.20052	2.66297e-05	0.00209503	down
2684963	MGG_06790	NA	NA	uncharacterized protein	NA	NA	NA	NA	NA	9.72902	11.6834	12.0824	32.6269	39.9763	39.8119	24.3183	3.37405	1.75448	0.418954	4.18777	2.81707e-05	0.0021963	up
12986520	MGG_17222	NA	NA	uncharacterized protein	NA	NA	NA	NA	NA	20.1066	16.8761	9.66593	50.9796	51.1697	46.6369	32.5725	3.19129	1.67414	0.400311	4.1821	2.88835e-05	0.00223176	up
2675691	MGG_05074	MGG_05074T0	RAN protein kinase [Source:UniProtKB/TrEMBL;Acc:G4N465]	RAN protein kinase	protein_coding	GO:0005524(ATP binding); GO:0004672(protein kinase activity); GO:0000166(nucleotide binding); GO:0004674(protein serine/threonine kinase activity); GO:0006468(protein phosphorylation); GO:0016772(transferase activity, transferring phosphorus-containing groups); GO:0016301(kinase activity); GO:0016310(phosphorylation)	NA	NA	NA	239.334	249.896	217.483	393.562	457.329	377.645	322.542	1.73761	0.797106	0.19146	4.1633	3.13681e-05	0.0024023	none
2680843	MGG_09844	NA	NA	uncharacterized protein	NA	NA	NA	NA	NA	707.624	473.828	273.667	218.193	108.736	186.547	328.099	0.352403	-1.5047	0.362124	-4.15521	3.24987e-05	0.00246705	down
2676040	MGG_05638	MGG_05638T0	Putative uncharacterized protein [Source:UniProtKB/TrEMBL;Acc:G4MNK9]	uncharacterized protein	protein_coding	GO:0003674(molecular_function); GO:0008150(biological_process); GO:0005575(cellular_component)	NA	NA	NA	194.58	176.55	125.053	407.836	279.834	336.695	253.425	2.06158	1.04375	0.252529	4.13319	3.57767e-05	0.00269227	up
5049835	MGG_12068	MGG_12068T0	Putative uncharacterized protein [Source:UniProtKB/TrEMBL;Acc:G4NHL5]	uncharacterized protein	protein_coding	GO:0005575(cellular_component)	NA	NA	NA	1147.38	974.269	991.362	619.911	681.196	589.217	833.889	0.606917	-0.72043	0.174698	-4.12387	3.72564e-05	0.00277946	none
2679448	MGG_01282	MGG_01282T0	Polyubiquitin [Source:UniProtKB/TrEMBL;Acc:G4MY63]	polyubiquitin	protein_coding	GO:0005737(cytoplasm); GO:0043581(obsolete mycelium development); GO:0016567(protein ubiquitination); GO:0003674(molecular_function); GO:0005575(cellular_component); GO:0005515(protein binding)	04120(Ubiquitin mediated proteolysis)	K08770	NA	1391.25	1416.29	1204.01	1982.09	2542.49	2171.46	1784.6	1.66965	0.739548	0.179768	4.11392	3.89004e-05	0.00282959	none
2682165	MGG_10530	MGG_10530T0	Sugar transporter [Source:UniProtKB/TrEMBL;Acc:G4MKE5]	sugar transporter	protein_coding	GO:0016021(integral component of membrane); GO:0006810(transport); GO:0055085(transmembrane transport); GO:0008643(carbohydrate transport); GO:0016020(membrane); GO:0005215(transporter activity); GO:0022891(GO_0022891); GO:0022857(transmembrane transporter activity)	NA	NA	NA	122.586	113.589	102.701	48.9404	47.9716	56.8742	82.1102	0.457203	-1.12909	0.274328	-4.11585	3.85751e-05	0.00282959	down
5049029	MGG_13809	NA	NA	cellobiose dehydrogenase	NA	NA	NA	K19069	ec:1.1.99.18	51.8881	41.5411	59.8079	12.2351	7.99526	20.4747	32.3237	0.275311	-1.86086	0.45234	-4.11386	3.89094e-05	0.00282959	down
2680651	MGG_14041	MGG_14041T0	Putative uncharacterized protein [Source:UniProtKB/TrEMBL;Acc:G4NL57]	uncharacterized protein	protein_coding	GO:0046872(metal ion binding); GO:0009055(electron transfer activity); GO:0020037(heme binding); GO:0005506(iron ion binding); GO:0016020(membrane); GO:0016491(oxidoreductase activity); GO:0055114(oxidation-reduction process); GO:0004497(monooxygenase activity); GO:0016705(oxidoreductase activity, acting on paired donors, with incorporation or reduction of molecular oxygen); GO:0016021(integral c…	NA	NA	NA	5.83741	0	3.62472	18.3526	54.3678	15.9248	16.3512	9.33714	3.22298	0.784971	4.10586	4.02809e-05	0.00290493	up
2674867	MGG_00574	MGG_00574T0	Galactan 1,3-beta-galactosidase [Source:UniProtKB/TrEMBL;Acc:G4NBC5]	galactan 1,3-beta-galactosidase	protein_coding	GO:0005975(carbohydrate metabolic process); GO:0004553(hydrolase activity, hydrolyzing O-glycosyl compounds); GO:0016787(hydrolase activity); GO:0008152(metabolic process); GO:0016798(hydrolase activity, acting on glycosyl bonds)	NA	NA	NA	63.563	37.6466	44.7049	6.11755	20.7877	6.82491	29.9408	0.230132	-2.11947	0.516854	-4.10071	4.11886e-05	0.00292169	down
2676308	MGG_10785	NA	NA	meiotic chromosome segregation protein	NA	NA	NA	NA	NA	11.6748	17.5252	10.8742	0	0	0	6.67903	0.0213284	-5.55108	1.3531	-4.1025	4.08717e-05	0.00292169	down
2681517	MGG_02420	MGG_02420T0	Putative uncharacterized protein [Source:UniProtKB/TrEMBL;Acc:G4MRG8]	uncharacterized protein	protein_coding	GO:0050660(flavin adenine dinucleotide binding); GO:0016020(membrane); GO:0003824(catalytic activity); GO:0016491(oxidoreductase activity); GO:0055114(oxidation-reduction process); GO:0003885(D-arabinono-1,4-lactone oxidase activity); GO:0016614(oxidoreductase activity, acting on CH-OH group of donors); GO:0008762(UDP-N-acetylmuramate dehydrogenase activity); GO:0031966(mitochondrial membrane); G…	00053(Ascorbate and aldarate metabolism); 01240(Biosynthesis of cofactors)	K00103	ec:1.1.3.8	583.741	600.399	880.808	405.797	348.593	278.684	516.337	0.498446	-1.00449	0.246691	-4.07186	4.66399e-05	0.00325501	down
2679515	MGG_01569	MGG_01569T0	Minor allergen Alt a 7 [Source:UniProtKB/TrEMBL;Acc:G4MTI8]	minor allergen Alt a 7	protein_coding	GO:0005737(cytoplasm); GO:0016491(oxidoreductase activity); GO:0055114(oxidation-reduction process); GO:0045892(negative regulation of transcription, DNA-templated); GO:0010181(FMN binding); GO:0008150(biological_process); GO:0005575(cellular_component); GO:0003955(NAD(P)H dehydrogenase (quinone) activity)	00130(Ubiquinone and other terpenoid-quinone biosynthesis); 01240(Biosynthesis of cofactors)	K03809	ec:1.6.5.2	598.011	347.258	567.269	244.702	195.084	271.859	370.697	0.471151	-1.08574	0.266602	-4.07251	4.6509e-05	0.00325501	down
2674858	MGG_00220	MGG_00220T0	NADP-dependent alcohol dehydrogenase 6 [Source:UniProtKB/TrEMBL;Acc:G4NDL7]	NADP-dependent alcohol dehydrogenase 6	protein_coding	GO:0046872(metal ion binding); GO:0008270(zinc ion binding); GO:0000166(nucleotide binding); GO:0016491(oxidoreductase activity); GO:0006066(alcohol metabolic process); GO:0055114(oxidation-reduction process); GO:0033833(hydroxymethylfurfural reductase (NADH) activity); GO:0033859(furaldehyde metabolic process); GO:0044271(cellular nitrogen compound biosynthetic process); GO:0033845(hydroxymethyl…	00010(Glycolysis / Gluconeogenesis); 00040(Pentose and glucuronate interconversions); 00053(Ascorbate and aldarate metabolism); 00561(Glycerolipid metabolism); 00620(Pyruvate metabolism); 01240(Biosynthesis of cofactors)	K00002	ec:1.1.1.2	507.855	496.546	403.553	311.995	211.075	218.397	358.237	0.523762	-0.933016	0.229524	-4.06501	4.80311e-05	0.00332529	none
5051711	MGG_13562	MGG_13562T0	Putative uncharacterized protein [Source:UniProtKB/TrEMBL;Acc:G4N8K4]	uncharacterized protein	protein_coding	GO:0016021(integral component of membrane); GO:0055085(transmembrane transport); GO:0022857(transmembrane transporter activity); GO:0016020(membrane)	NA	NA	NA	83.021	98.011	96.0552	40.7836	38.3773	42.0869	66.3892	0.438362	-1.18981	0.293783	-4.04994	5.12297e-05	0.00351858	down
2676642	MGG_03367	MGG_03367T0	Putative uncharacterized protein [Source:UniProtKB/TrEMBL;Acc:G4N8W6]	uncharacterized protein	protein_coding	GO:0016020(membrane); GO:0016021(integral component of membrane)	NA	NA	NA	9.72902	11.0344	15.103	20.3918	100.74	42.0869	33.1809	4.56555	2.19079	0.542115	4.04119	5.31816e-05	0.00362388	up
2684172	MGG_05803	MGG_05803T0	Putative uncharacterized protein [Source:UniProtKB/TrEMBL;Acc:G4N0H5]	uncharacterized protein	protein_coding	GO:0016787(hydrolase activity)	NA	NA	NA	5.18881	14.9288	10.2701	24.4702	51.1697	45.4994	25.2545	4.02967	2.01066	0.499266	4.02723	5.64372e-05	0.00369974	up
2684095	MGG_05880	MGG_05880T0	Putative uncharacterized protein [Source:UniProtKB/TrEMBL;Acc:G4N3X9]	uncharacterized protein	protein_coding	GO:0016021(integral component of membrane); GO:0006810(transport); GO:0016020(membrane); GO:0005215(transporter activity); GO:0055085(transmembrane transport); GO:0015267(channel activity)	NA	NA	NA	10.3776	14.2798	8.45769	24.4702	57.5659	38.6745	25.6376	3.68062	1.87995	0.467254	4.0234	5.73639e-05	0.00369974	up
2680058	MGG_09138	MGG_09138T0	Putative uncharacterized protein [Source:UniProtKB/TrEMBL;Acc:Q2KEU3]	glutathione S-transferase II	protein_coding	GO:0008150(biological_process); GO:0005575(cellular_component); GO:0016740(transferase activity); GO:0005515(protein binding)	00480(Glutathione metabolism)	K00799	ec:2.5.1.18	46.6993	54.5227	24.7689	61.1755	191.886	159.248	89.7168	3.29523	1.72038	0.426934	4.02962	5.5868e-05	0.00369974	up
2677071	MGG_10921	MGG_10921T0	Putative uncharacterized protein [Source:UniProtKB/TrEMBL;Acc:G4MLV7]	uncharacterized protein	protein_coding	GO:0003674(molecular_function); GO:0008150(biological_process); GO:0005575(cellular_component)	NA	NA	NA	30.4843	28.5595	18.1236	50.9796	100.74	67.1116	49.3331	2.85156	1.51175	0.375179	4.02942	5.59153e-05	0.00369974	up
2675693	MGG_05143	MGG_05143T0	Putative uncharacterized protein [Source:UniProtKB/TrEMBL;Acc:G4N4Q3]	uncharacterized protein	protein_coding	GO:0003674(molecular_function); GO:0008150(biological_process); GO:0005575(cellular_component)	NA	NA	NA	19.458	24.016	26.5813	46.9012	89.5469	58.0117	44.0859	2.78238	1.47632	0.366357	4.02972	5.58425e-05	0.00369974	up
2675697	MGG_05116	MGG_05116T0	Malic acid transporter [Source:UniProtKB/TrEMBL;Acc:G4N4G8]	malic acid transporter	protein_coding	GO:0016021(integral component of membrane); GO:0055085(transmembrane transport); GO:0016020(membrane)	NA	NA	NA	32.4301	21.4196	19.3319	79.5281	67.1602	53.4618	45.5553	2.71195	1.43933	0.357783	4.02291	5.74833e-05	0.00369974	up
2680832	MGG_09875	NA	NA	CAS1 domain-containing protein 1	NA	NA	NA	NA	NA	343.11	286.244	197.547	161.095	97.5422	69.3865	192.488	0.39152	-1.35284	0.335864	-4.02795	5.62649e-05	0.00369974	down
5049704	MGG_11913	NA	NA	uncharacterized protein	NA	NA	NA	NA	NA	152.421	71.3988	67.0574	18.3526	39.9763	27.2996	62.751	0.297038	-1.75128	0.435429	-4.02196	5.77149e-05	0.00369974	down
2683815	MGG_07888	NA	NA	uncharacterized protein	NA	NA	NA	NA	NA	9.08042	10.3853	7.24945	22.431	46.3725	31.8496	21.228	3.80047	1.92618	0.479354	4.01827	5.86268e-05	0.00371346	up
2674250	MGG_00570	MGG_00570T0	Putative uncharacterized protein [Source:UniProtKB/TrEMBL;Acc:G4NBC9]	uncharacterized protein	protein_coding	GO:0005975(carbohydrate metabolic process); GO:0004553(hydrolase activity, hydrolyzing O-glycosyl compounds); GO:0005575(cellular_component)	NA	NA	NA	200.418	147.341	143.781	95.8416	41.5754	65.9741	115.822	0.409431	-1.28831	0.320743	-4.01664	5.9035e-05	0.00371346	down
2679832	MGG_08846	NA	NA	uncharacterized protein	NA	NA	NA	NA	NA	24.6469	19.4724	25.9772	2.03918	1.59905	0	12.2891	0.0438005	-4.51291	1.12376	-4.01591	5.92162e-05	0.00371346	down
2674127	MGG_01074	MGG_01074T0	WD repeat-containing protein 5B [Source:UniProtKB/TrEMBL;Acc:G4NCI4]	WD repeat-containing protein 5B	protein_coding	GO:0005515(protein binding)	NA	K15361	NA	70.6976	79.1877	53.1626	130.508	151.91	136.498	103.661	2.06673	1.04735	0.261607	4.00352	6.24068e-05	0.00388538	up
2679196	MGG_01444	MGG_01444T0	Putative uncharacterized protein [Source:UniProtKB/TrEMBL;Acc:G4MSH1]	uncharacterized protein	protein_coding	GO:0003674(molecular_function); GO:0005575(cellular_component)	NA	NA	NA	644.71	585.47	555.187	367.053	283.032	378.782	469.039	0.576696	-0.794117	0.19899	-3.99073	6.58699e-05	0.0040717	none
2682928	MGG_07043	MGG_07043T0	Putative uncharacterized protein [Source:UniProtKB/TrEMBL;Acc:G4MZQ0]	uncharacterized protein	protein_coding	GO:0003674(molecular_function); GO:0005575(cellular_component)	NA	NA	NA	33.0787	59.0663	64.6409	95.8416	191.886	127.398	95.3187	2.65233	1.40726	0.35283	3.9885	6.64935e-05	0.0040811	up
2679231	MGG_01404	MGG_01404T0	NAD(P)H-dependent D-xylose reductase [Source:UniProtKB/TrEMBL;Acc:G4MZI3]	NAD(P)H-dependent D-xylose reductase	protein_coding	GO:0016491(oxidoreductase activity); GO:0055114(oxidation-reduction process)	00040(Pentose and glucuronate interconversions)	K17743	ec:1.1.1.307	1346.5	952.849	1088.63	746.341	558.069	528.93	870.219	0.53987	-0.889315	0.223452	-3.97989	6.89486e-05	0.00420198	none
2681850	MGG_10251	NA	NA	uncharacterized protein	NA	NA	NA	K14708	NA	53.8339	37.6466	66.4533	110.116	196.683	102.374	94.5178	2.58573	1.37057	0.345279	3.96945	7.2038e-05	0.00435956	up
5049784	MGG_12009	MGG_12009T0	Putative uncharacterized protein [Source:UniProtKB/TrEMBL;Acc:G4NI20]	uncharacterized protein	protein_coding	GO:0008270(zinc ion binding); GO:0005622(intracellular)	NA	NA	NA	264.629	273.263	246.481	336.465	769.144	625.616	419.266	2.21191	1.14529	0.28922	3.95992	7.49739e-05	0.00450572	up
2684055	MGG_13262	MGG_13262T0	FAD binding domain-containing protein [Source:UniProtKB/TrEMBL;Acc:G4N419]	FAD binding domain-containing protein	protein_coding	GO:0050660(flavin adenine dinucleotide binding); GO:0003824(catalytic activity); GO:0016491(oxidoreductase activity); GO:0055114(oxidation-reduction process); GO:0016614(oxidoreductase activity, acting on CH-OH group of donors); GO:0008762(UDP-N-acetylmuramate dehydrogenase activity); GO:0003674(molecular_function); GO:0005575(cellular_component); GO:0071949(FAD binding)	NA	NA	NA	81.0752	48.681	54.975	24.4702	17.5896	20.4747	41.2109	0.335869	-1.57403	0.399027	-3.94467	7.99085e-05	0.00476916	down
5048854	MGG_12923	MGG_12923T0	Putative uncharacterized protein [Source:UniProtKB/TrEMBL;Acc:G4N505]	uncharacterized protein	protein_coding	GO:0003674(molecular_function); GO:0008150(biological_process); GO:0005575(cellular_component)	NA	NA	NA	66.1574	74.6442	66.4533	124.39	198.282	121.711	108.606	2.14277	1.09948	0.279055	3.94001	8.14795e-05	0.00482961	up
2682089	MGG_10456	NA	NA	uncharacterized protein	NA	NA	NA	NA	NA	36.3217	18.1742	9.66593	26.5094	199.882	103.511	65.6773	5.16738	2.36943	0.603055	3.92905	8.52832e-05	0.00502069	up
2680054	MGG_09134	NA	NA	uncharacterized protein	NA	NA	NA	NA	NA	502.018	805.508	209.026	2783.48	4952.27	1601.58	1808.98	6.15692	2.62221	0.668709	3.9213	8.80723e-05	0.00514985	up
2682141	MGG_10515	NA	NA	uncharacterized protein	NA	NA	NA	NA	NA	100.533	44.7865	26.5813	8.15673	19.1886	4.54994	33.9661	0.182217	-2.45627	0.627152	-3.91655	8.98257e-05	0.00521713	down
2684693	MGG_06538	MGG_06538T0	Bys1 family protein [Source:UniProtKB/TrEMBL;Acc:G4N6L5]	Bys1 family protein	protein_coding	GO:0052051(obsolete interaction with host via protein secreted by type II secretion system); GO:0003674(molecular_function); GO:0005575(cellular_component); GO:0007275(multicellular organism development)	NA	NA	NA	119.991	225.231	80.9522	267.133	681.196	342.383	286.148	3.03109	1.59984	0.411616	3.88672	0.000101608	0.00582327	up
2678389	MGG_08152	MGG_08152T0	Putative uncharacterized protein [Source:UniProtKB/TrEMBL;Acc:G4MYT2]	uncharacterized protein	protein_coding	GO:0003674(molecular_function); GO:0008150(biological_process); GO:0005575(cellular_component)	NA	NA	NA	112.208	86.9767	119.616	185.566	305.419	185.41	165.866	2.12046	1.08438	0.278893	3.88815	0.00010101	0.00582327	up
2679376	MGG_01336	MGG_01336T0	Bacteriodes thetaiotaomicron symbiotic chitinase [Source:UniProtKB/TrEMBL;Acc:G4MYN0]	bacteriodes thetaiotaomicron symbiotic chitinase	protein_coding	GO:0005975(carbohydrate metabolic process); GO:0003824(catalytic activity); GO:0006032(chitin catabolic process); GO:0004553(hydrolase activity, hydrolyzing O-glycosyl compounds); GO:0008061(chitin binding); GO:0043169(cation binding); GO:0004568(chitinase activity); GO:0005575(cellular_component); GO:0000272(polysaccharide catabolic process)	00520(Amino sugar and nucleotide sugar metabolism)	K01183	ec:3.2.1.14	237.388	216.793	216.275	142.743	95.9431	122.848	171.998	0.537067	-0.896826	0.231487	-3.8742	0.000106975	0.00609054	none
12984239	MGG_16743	MGG_16743T0	Putative uncharacterized protein [Source:UniProtKB/TrEMBL;Acc:G4N4W7]	uncharacterized protein	protein_coding	NA	NA	NA	NA	62.9143	55.1718	41.0802	89.724	220.669	111.473	96.8388	2.65583	1.40916	0.365375	3.85675	0.000114903	0.00649914	up
2678331	MGG_08041	NA	NA	metalloprotease 1	NA	NA	NA	NA	NA	538.988	545.876	682.656	369.092	350.192	338.97	470.963	0.597865	-0.742109	0.192632	-3.85248	0.000116929	0.00657081	none
12986361	MGG_16425	MGG_16425T0	Putative uncharacterized protein [Source:UniProtKB/TrEMBL;Acc:G4MNI7]	uncharacterized protein	protein_coding	GO:0005975(carbohydrate metabolic process); GO:0008152(metabolic process); GO:0016787(hydrolase activity); GO:0003824(catalytic activity); GO:0052692(raffinose alpha-galactosidase activity); GO:0004553(hydrolase activity, hydrolyzing O-glycosyl compounds); GO:0043169(cation binding); GO:0016798(hydrolase activity, acting on glycosyl bonds); GO:0004557(alpha-galactosidase activity)	00052(Galactose metabolism); 00561(Glycerolipid metabolism); 00600(Sphingolipid metabolism); 00603(Glycosphingolipid biosynthesis - globo and isoglobo series)	K07407	ec:3.2.1.22	92.75	91.5202	100.888	46.9012	39.9763	46.6369	69.7788	0.468337	-1.09438	0.284513	-3.8465	0.000119815	0.00668954	down
2685061	MGG_06888	MGG_06888T0	Glutamine synthetase [Source:UniProtKB/TrEMBL;Acc:G4MMY4]	glutamine synthetase	NA	NA	00220(Arginine biosynthesis); 00250(Alanine, aspartate and glutamate metabolism); 00630(Glyoxylate and dicarboxylate metabolism); 00910(Nitrogen metabolism); 01230(Biosynthesis of amino acids)	K01915	ec:6.3.1.2	55.7797	35.6994	28.9978	110.116	121.528	73.9365	71.0095	2.52338	1.33536	0.347456	3.84324	0.000121418	0.0067356	up
2682973	MGG_07088	NA	NA	uncharacterized protein	NA	NA	NA	NA	NA	48.6451	38.9448	7.85357	4.07836	4.79716	1.13748	17.5761	0.0988363	-3.33881	0.870143	-3.83709	0.000124503	0.00686272	down
2679575	MGG_01294	MGG_01294T0	Putative uncharacterized protein [Source:UniProtKB/TrEMBL;Acc:G4MY79]	uncharacterized protein	protein_coding	GO:0003676(nucleic acid binding); GO:0005515(protein binding)	NA	K11593	NA	73.9406	72.6969	61.6203	126.429	191.886	118.298	107.479	2.09434	1.0665	0.278401	3.83079	0.000127733	0.00699622	up
2683855	MGG_07928	MGG_07928T0	Ubiquitin-40S ribosomal protein S27a [Source:UniProtKB/TrEMBL;Acc:G4N2G1]	ubiquitin-40S ribosomal protein S27a	protein_coding	GO:0006412(translation); GO:0003735(structural constituent of ribosome); GO:0005840(ribosome); GO:0005622(intracellular); GO:0046872(metal ion binding); GO:0005515(protein binding)	03010(Ribosome); 04120(Ubiquitin mediated proteolysis)	K02977	NA	6937.44	6588.16	7582.92	19374.3	11346.9	10594.5	10404	1.957	0.968643	0.25316	3.82621	0.00013013	0.0070827	none
12986248	MGG_17712	NA	NA	uncharacterized protein	NA	NA	NA	NA	NA	46.0507	50.6282	53.7667	97.8808	103.938	98.9611	75.2043	1.99876	0.999105	0.261445	3.82147	0.000132657	0.00717508	none
2679277	MGG_01176	MGG_01176T0	D-xylulose reductase A [Source:UniProtKB/TrEMBL;Acc:G4MWK5]	D-xylulose reductase A	protein_coding	GO:0046872(metal ion binding); GO:0008270(zinc ion binding); GO:0000166(nucleotide binding); GO:0016491(oxidoreductase activity); GO:0055114(oxidation-reduction process); GO:0008150(biological_process); GO:0005575(cellular_component)	00040(Pentose and glucuronate interconversions)	K05351	ec:1.1.1.9	156.313	142.798	156.467	91.7632	81.5517	61.4242	115.053	0.508078	-0.976877	0.255749	-3.81967	0.000133628	0.00718272	none
2679131	MGG_01389	MGG_01389T0	Alpha-N-arabinofuranosidase C [Source:UniProtKB/TrEMBL;Acc:G4MZ58]	alpha-N-arabinofuranosidase C	protein_coding	GO:0005975(carbohydrate metabolic process); GO:0003824(catalytic activity); GO:0043169(cation binding); GO:0046373(L-arabinose metabolic process); GO:0046556(alpha-L-arabinofuranosidase activity); GO:0016787(hydrolase activity); GO:0031222(arabinan catabolic process)	00520(Amino sugar and nucleotide sugar metabolism)	K01209	ec:3.2.1.55	105.073	114.238	96.6593	44.862	57.5659	48.9118	77.8851	0.480318	-1.05794	0.278384	-3.80028	0.000144535	0.00772101	down
2679461	MGG_01605	MGG_01605T0	FAD binding domain-containing protein [Source:UniProtKB/TrEMBL;Acc:G4MTY8]	FAD binding domain-containing protein	protein_coding	GO:0043581(obsolete mycelium development); GO:0008152(metabolic process); GO:0016491(oxidoreductase activity); GO:0055114(oxidation-reduction process); GO:0005575(cellular_component); GO:0071949(FAD binding)	NA	K03380	ec:1.14.13.7	78.4808	90.8712	94.2428	118.273	364.584	200.197	157.775	2.59698	1.37683	0.362572	3.7974	0.00014622	0.0077631	up
2679151	MGG_01373	MGG_01373T0	Arabinose-proton symporter [Source:UniProtKB/TrEMBL;Acc:G4MZ34]	arabinose-proton symporter	protein_coding	GO:0016021(integral component of membrane); GO:0043581(obsolete mycelium development); GO:0006810(transport); GO:0055085(transmembrane transport); GO:0016020(membrane); GO:0005215(transporter activity); GO:0022891(GO_0022891); GO:0022857(transmembrane transporter activity)	NA	NA	NA	29.8357	27.2613	51.9544	124.39	123.127	59.1492	69.2863	2.7826	1.47643	0.389471	3.79087	0.000150118	0.00792149	up
5050604	MGG_11445	NA	NA	hypothetical protein, variant; uncharacterized protein	NA	NA	NA	NA	NA	1.9458	3.89448	3.62472	18.3526	17.5896	17.0623	10.4116	5.57572	2.47916	0.65427	3.7892	0.000151136	0.00792685	up
12986974	MGG_15188	NA	NA	uncharacterized protein	NA	NA	NA	NA	NA	6.48602	7.13988	3.62472	30.5877	23.9858	19.3372	15.1936	4.24018	2.08412	0.550717	3.78438	0.000154092	0.0080332	up
2674592	MGG_01143	MGG_01143T0	Putative uncharacterized protein [Source:UniProtKB/TrEMBL;Acc:G4NBZ4]	uncharacterized protein	protein_coding	NA	NA	NA	NA	38.2675	31.8049	28.9978	59.1363	86.3488	78.4864	53.8403	2.27772	1.18759	0.314358	3.77782	0.000158208	0.00819837	up
2675098	MGG_01096	MGG_01096T0	Glucoamylase [Source:UniProtKB/TrEMBL;Acc:G4NCF7]	glucoamylase	protein_coding	GO:0005975(carbohydrate metabolic process); GO:0008152(metabolic process); GO:0016787(hydrolase activity); GO:0003824(catalytic activity); GO:0005976(polysaccharide metabolic process); GO:0004339(glucan 1,4-alpha-glucosidase activity); GO:2001070(starch binding); GO:0030246(carbohydrate binding); GO:0004553(hydrolase activity, hydrolyzing O-glycosyl compounds); GO:0000272(polysaccharide catabolic…	00500(Starch and sucrose metabolism)	K01178	ec:3.2.1.3	86.264	113.589	111.158	210.036	203.08	167.21	148.556	1.85755	0.893402	0.237031	3.76913	0.000163818	0.00843856	none
12985836	MGG_14966	NA	NA	uncharacterized protein	NA	NA	NA	NA	NA	546.122	715.286	578.143	695.361	2817.53	1576.55	1154.83	2.76783	1.46876	0.3907	3.75929	0.000170397	0.00872551	up
5051099	MGG_11124	NA	NA	Na(+)/H(+) antiporter	NA	NA	NA	K24160	NA	33.0787	11.0344	1.81236	0	0	0	7.65423	0.018622	-5.74685	1.53065	-3.75451	0.000173679	0.00884126	down
2678530	MGG_08296	NA	NA	uncharacterized protein; hypothetical protein, variant	NA	NA	NA	NA	NA	10.3776	12.9816	7.24945	40.7836	25.5848	35.262	22.0399	3.31546	1.72921	0.461626	3.74591	0.000179741	0.00898714	up
5049086	MGG_13219	NA	NA	uncharacterized protein	NA	NA	00340(Histidine metabolism)	K20246	ec:2.1.1.44	128.423	165.515	119.616	181.487	418.952	320.771	222.461	2.23486	1.16018	0.309731	3.74578	0.000179837	0.00898714	up
2681780	MGG_10153	NA	NA	uncharacterized protein	NA	NA	NA	NA	NA	179.014	159.025	143.781	240.624	482.914	286.646	248.667	2.09879	1.06956	0.285629	3.74458	0.000180698	0.00898714	up
2681351	MGG_02254	MGG_02254T0	Putative uncharacterized protein [Source:UniProtKB/TrEMBL;Acc:G4MQ20]	uncharacterized protein	protein_coding	GO:0016740(transferase activity); GO:0008150(biological_process); GO:0005575(cellular_component)	NA	NA	NA	84.3182	122.027	88.2016	185.566	212.674	168.348	143.522	1.92096	0.941824	0.251507	3.74472	0.000180595	0.00898714	none
12986292	MGG_16375	NA	NA	aldehyde reductase	NA	NA	NA	K15303	NA	40.8619	56.4699	30.206	103.998	83.1507	104.649	69.8892	2.29206	1.19665	0.319894	3.74076	0.000183468	0.00904305	up
12984493	MGG_14886	NA	NA	sphingolipid C9-methyltransferase	NA	NA	NA	K20238	ec:2.1.1.317	416.402	366.081	415.635	283.446	204.679	199.06	314.217	0.569798	-0.811477	0.216964	-3.74015	0.000183912	0.00904305	none
2676566	MGG_03407	MGG_03407T0	Putative uncharacterized protein [Source:UniProtKB/TrEMBL;Acc:G4N8M0]	uncharacterized protein	protein_coding	GO:0016787(hydrolase activity); GO:0008152(metabolic process); GO:0016798(hydrolase activity, acting on glycosyl bonds)	NA	NA	NA	105.073	99.9583	87.5975	14.2743	17.5896	56.8742	63.5612	0.316596	-1.65929	0.444546	-3.73254	0.000189558	0.00926798	down
2676401	MGG_10879	NA	NA	bifunctional P-450:NADPH-P450 reductase	NA	NA	00071(Fatty acid degradation); 00380(Tryptophan metabolism)	K14338	ec:1.14.14.1	114.802	109.045	125.657	205.957	183.891	218.397	159.625	1.74236	0.801041	0.214844	3.72848	0.000192635	0.00936552	none
2678592	MGG_08309	MGG_08309T0	multidrug resistance-associated protein 2 [Source:UniProtKB/TrEMBL;Acc:G4MWV6]	multidrug resistance-associated protein 2	NA	NA	NA	NA	NA	36.3217	31.8049	48.9338	55.0579	150.311	104.649	71.1796	2.66257	1.41282	0.379087	3.72691	0.000193843	0.00937161	up
2681713	MGG_10102	MGG_10102T0	Putative uncharacterized protein [Source:UniProtKB/TrEMBL;Acc:G4N8Z8]	uncharacterized protein	protein_coding	GO:0003674(molecular_function); GO:0008150(biological_process); GO:0005575(cellular_component)	NA	NA	NA	25.9441	12.3325	23.5607	61.1755	46.3725	61.4242	38.4682	2.73136	1.44962	0.389638	3.72043	0.000198882	0.00945672	up
2675544	MGG_04927	MGG_04927T0	High-affinity nicotinic acid transporter [Source:UniProtKB/TrEMBL;Acc:G4N355]	high-affinity nicotinic acid transporter	protein_coding	GO:0016021(integral component of membrane); GO:0043581(obsolete mycelium development); GO:0055085(transmembrane transport); GO:0016020(membrane); GO:0022857(transmembrane transporter activity)	NA	NA	NA	71.9948	98.011	81.5563	169.252	260.646	127.398	134.81	2.20897	1.14337	0.307148	3.72255	0.000197224	0.00945672	up
2675109	MGG_00345	MGG_00345T0	AGC protein kinase [Source:UniProtKB/TrEMBL;Acc:G4NCR0]	AGC protein kinase	protein_coding	GO:0005524(ATP binding); GO:0004672(protein kinase activity); GO:0000166(nucleotide binding); GO:0006355(regulation of transcription, DNA-templated); GO:0004871(obsolete signal transducer activity); GO:0016740(transferase activity); GO:0004674(protein serine/threonine kinase activity); GO:0000156(phosphorelay response regulator activity); GO:0006468(protein phosphorylation); GO:0005622(intracellu…	04113(Meiosis - yeast); 04138(Autophagy - yeast)	K12767	ec:2.7.11.1	107.668	109.045	114.179	256.937	158.306	209.297	159.239	1.88069	0.911259	0.244891	3.72108	0.000198369	0.00945672	none
2674745	MGG_00832	MGG_00832T0	Cytochrome P450 [Source:UniProtKB/TrEMBL;Acc:G4NE30]	cytochrome P450	protein_coding	GO:0046872(metal ion binding); GO:0043581(obsolete mycelium development); GO:0009055(electron transfer activity); GO:0020037(heme binding); GO:0005506(iron ion binding); GO:0016020(membrane); GO:0016491(oxidoreductase activity); GO:0055114(oxidation-reduction process); GO:0004497(monooxygenase activity); GO:0016705(oxidoreductase activity, acting on paired donors, with incorporation or reduction …	NA	NA	NA	22.0525	36.9975	71.8904	118.273	217.471	86.4488	92.1888	3.21368	1.68423	0.453615	3.7129	0.0002049	0.00962032	up
2674287	MGG_00602	MGG_00602T0	Cross-pathway control protein 1 [Source:UniProtKB/TrEMBL;Acc:G4NB89]	cross-pathway control protein 1	protein_coding	GO:0003677(DNA binding); GO:0043581(obsolete mycelium development); GO:0005634(nucleus); GO:0006355(regulation of transcription, DNA-templated); GO:0043565(sequence-specific DNA binding); GO:0003700(DNA-binding transcription factor activity)	04138(Autophagy - yeast)	K09464	NA	3167.12	3865.92	3851.87	5144.86	8295.88	5928.57	5042.37	1.77958	0.831539	0.223977	3.71261	0.000205129	0.00962032	none
2682464	MGG_02911	MGG_02911T0	Xylosidase/arabinosidase [Source:UniProtKB/TrEMBL;Acc:G5EHS5]	xylosidase/arabinosidase	protein_coding	GO:0005975(carbohydrate metabolic process); GO:0004553(hydrolase activity, hydrolyzing O-glycosyl compounds); GO:0005575(cellular_component); GO:0016787(hydrolase activity); GO:0008152(metabolic process); GO:0016798(hydrolase activity, acting on glycosyl bonds)	NA	NA	NA	106.371	64.2589	83.3687	16.3135	38.3773	38.6745	57.8939	0.377132	-1.40686	0.379135	-3.71071	0.000206676	0.00962032	down
5049734	MGG_11948	NA	NA	uncharacterized protein	NA	NA	NA	NA	NA	21.4039	5.19264	32.6225	0	0	1.13748	10.0594	0.0280604	-5.15532	1.38935	-3.7106	0.000206769	0.00962032	down
2683066	MGG_07347	MGG_07347T0	Putative uncharacterized protein [Source:UniProtKB/TrEMBL;Acc:G4MVF4]	uncharacterized protein	protein_coding	NA	NA	NA	NA	3.24301	3.89448	7.85357	12.2351	46.3725	20.4747	15.6789	5.27587	2.39941	0.648389	3.70057	0.000215115	0.00985128	up
2678729	MGG_13971	NA	NA	uncharacterized protein	NA	NA	NA	NA	NA	87.5612	99.3092	91.2222	53.0187	41.5754	38.6745	68.5602	0.472497	-1.08162	0.292288	-3.70053	0.000215148	0.00985128	down
2684170	MGG_05805	MGG_05805T0	Putative uncharacterized protein [Source:UniProtKB/TrEMBL;Acc:G4N0H9]	uncharacterized protein	protein_coding	GO:0003674(molecular_function); GO:0008150(biological_process); GO:0005575(cellular_component)	NA	NA	NA	83.021	50.6282	25.9772	12.2351	12.7924	15.9248	33.4298	0.259928	-1.94382	0.525019	-3.70237	0.000213594	0.00985128	down
2682120	MGG_10508	NA	NA	glucose transporter HXT1	NA	NA	NA	NA	NA	107.019	110.344	108.742	53.0187	55.9668	56.8742	81.9941	0.510137	-0.971042	0.263021	-3.69188	0.000222599	0.0100857	none
2675858	MGG_05520	MGG_05520T0	Exoglucanase 2 [Source:UniProtKB/TrEMBL;Acc:G4MM92]	exoglucanase 2	protein_coding	GO:0005975(carbohydrate metabolic process); GO:0005576(extracellular region); GO:0030245(cellulose catabolic process); GO:0030248(cellulose binding); GO:0004553(hydrolase activity, hydrolyzing O-glycosyl compounds); GO:0016787(hydrolase activity); GO:0008152(metabolic process); GO:0016798(hydrolase activity, acting on glycosyl bonds); GO:0000272(polysaccharide catabolic process); GO:0016162(cellu…	00500(Starch and sucrose metabolism)	K19668	ec:3.2.1.91	156.962	61.0135	115.387	0	0	9.09987	57.077	0.0297167	-5.07258	1.37383	-3.6923	0.000222233	0.0100857	down
2682188	MGG_10575	MGG_10575T0	Putative uncharacterized protein [Source:UniProtKB/TrEMBL;Acc:G5EH94]	uncharacterized protein	protein_coding	GO:0043581(obsolete mycelium development); GO:0046983(protein dimerization activity)	NA	NA	NA	16.8636	40.2429	16.9154	63.2147	100.74	58.0117	49.3314	2.9985	1.58424	0.429493	3.68863	0.000225462	0.0101622	up
2675112	MGG_00047	MGG_00047T0	Putative uncharacterized protein [Source:UniProtKB/TrEMBL;Acc:G4NEU0]	uncharacterized protein	protein_coding	GO:0003674(molecular_function); GO:0008150(biological_process); GO:0005575(cellular_component)	NA	NA	NA	31.1329	36.9975	7.85357	77.4889	76.7545	95.5487	54.296	3.30429	1.72434	0.468248	3.68253	0.00023093	0.0101779	up
2682187	MGG_10574	NA	NA	GNAT family N-acetyltransferase	NA	NA	NA	NA	NA	23.9983	24.665	19.936	73.4106	46.3725	51.1868	39.9282	2.46745	1.30302	0.353795	3.68299	0.000230518	0.0101779	up
2682623	MGG_03070	MGG_03070T0	Epoxide hydrolase domain-containing protein [Source:UniProtKB/TrEMBL;Acc:G5EH85]	epoxide hydrolase domain-containing protein	protein_coding	GO:0008152(metabolic process); GO:0016787(hydrolase activity); GO:0004301(epoxide hydrolase activity); GO:0016020(membrane); GO:0003824(catalytic activity); GO:0033961(cis-stilbene-oxide hydrolase activity)	NA	NA	NA	1925.05	2293.85	1624.48	2561.21	6133.96	3936.83	3079.23	2.16218	1.11248	0.302167	3.68169	0.00023169	0.0101779	up
2679433	MGG_01231	MGG_01231T0	Sorbitol dehydrogenase [Source:UniProtKB/TrEMBL;Acc:G4MXJ5]	sorbitol dehydrogenase	protein_coding	GO:0008270(zinc ion binding); GO:0000166(nucleotide binding); GO:0016491(oxidoreductase activity); GO:0055114(oxidation-reduction process); GO:0008150(biological_process); GO:0005575(cellular_component); GO:0005975(carbohydrate metabolic process)	00040(Pentose and glucuronate interconversions); 00051(Fructose and mannose metabolism)	K00008	ec:1.1.1.14	311.329	253.79	260.376	179.448	137.519	155.835	216.383	0.570854	-0.808806	0.219665	-3.68199	0.000231422	0.0101779	none
2683597	MGG_07677	MGG_07677T0	Rhamnogalacturonan acetylesterase [Source:UniProtKB/TrEMBL;Acc:G4N3D2]	rhamnogalacturonan acetylesterase	protein_coding	GO:0016787(hydrolase activity); GO:0005575(cellular_component)	NA	K15530	ec:3.1.1.86	102.479	129.816	141.364	40.7836	71.9574	60.2867	91.1145	0.467818	-1.09598	0.297589	-3.68287	0.000230624	0.0101779	down
2677040	MGG_10893	NA	NA	uncharacterized protein	NA	NA	NA	NA	NA	173.825	48.0319	28.3937	6.11755	27.1839	12.5123	49.3441	0.184807	-2.43591	0.663182	-3.67306	0.000239666	0.0104751	down
2682051	MGG_10484	MGG_10484T0	Putative uncharacterized protein [Source:UniProtKB/TrEMBL;Acc:G4MYG1]	uncharacterized protein	protein_coding	GO:0003674(molecular_function); GO:0008150(biological_process); GO:0005575(cellular_component)	NA	NA	NA	86.264	86.3276	68.8698	42.8228	30.382	35.262	58.3214	0.445626	-1.1661	0.317872	-3.66845	0.000244028	0.0106121	down
5050935	MGG_12337	MGG_12337T0	MAS3 protein [Source:UniProtKB/TrEMBL;Acc:G4MSQ1]	MAS3 protein	protein_coding	NA	NA	NA	NA	794.537	533.544	430.134	159.056	225.466	366.27	418.168	0.429638	-1.21881	0.332429	-3.66637	0.000246019	0.0106452	down
2674138	MGG_00450	MGG_00450T0	Phosphoenolpyruvate carboxykinase [Source:UniProtKB/TrEMBL;Acc:G4NC30]	phosphoenolpyruvate carboxykinase	protein_coding	GO:0005524(ATP binding); GO:0006094(gluconeogenesis); GO:0004612(phosphoenolpyruvate carboxykinase (ATP) activity); GO:0016301(kinase activity); GO:0016310(phosphorylation); GO:0000166(nucleotide binding); GO:0016829(lyase activity); GO:0016831(carboxy-lyase activity); GO:0004611(phosphoenolpyruvate carboxykinase activity); GO:0017076(purine nucleotide binding); GO:0005829(cytosol)	00010(Glycolysis / Gluconeogenesis); 00020(Citrate cycle (TCA cycle)); 00620(Pyruvate metabolism)	K01610	ec:4.1.1.49	1096.79	1195.6	775.087	1627.27	1675.81	2176.01	1424.43	1.78753	0.837967	0.228791	3.66259	0.000249679	0.0107498	none
2678405	MGG_08123	MGG_08123T0	Beta-glucosidase [Source:UniProtKB/TrEMBL;Acc:G4MYE1]	beta-glucosidase	protein_coding	GO:0005975(carbohydrate metabolic process); GO:0008152(metabolic process); GO:0016787(hydrolase activity); GO:0004553(hydrolase activity, hydrolyzing O-glycosyl compounds); GO:0030245(cellulose catabolic process); GO:0016798(hydrolase activity, acting on glycosyl bonds); GO:0000272(polysaccharide catabolic process); GO:0008422(beta-glucosidase activity); GO:0102483(scopolin beta-glucosidase activ…	00460(Cyanoamino acid metabolism); 00500(Starch and sucrose metabolism)	K05349	ec:3.2.1.21	297.708	272.613	277.896	187.605	132.721	170.623	223.194	0.577603	-0.791851	0.216332	-3.66034	0.000251879	0.0107909	none
2674561	MGG_00203	MGG_00203T0	Putative uncharacterized protein [Source:UniProtKB/TrEMBL;Acc:G4NDU5]	uncharacterized protein	protein_coding	GO:0005524(ATP binding); GO:0004672(protein kinase activity); GO:0006468(protein phosphorylation); GO:0005575(cellular_component)	NA	NA	NA	5.18881	5.19264	5.43709	18.3526	27.1839	19.3372	13.4487	4.10149	2.03615	0.558445	3.6461	0.000266245	0.0113502	up
2675679	MGG_05124	MGG_05124T0	Putative uncharacterized protein [Source:UniProtKB/TrEMBL;Acc:G4N4H7]	uncharacterized protein	protein_coding	GO:0016020(membrane); GO:0016021(integral component of membrane)	NA	NA	NA	1.9458	5.19264	4.83297	8.15673	33.5801	23.8872	12.9326	5.55616	2.47409	0.679088	3.64325	0.000269214	0.0113801	up
2682649	MGG_03096	MGG_03096T0	Fructose-bisphosphate aldolase [Source:UniProtKB/TrEMBL;Acc:G5EHY5]	fructose-bisphosphate aldolase	protein_coding	GO:0008270(zinc ion binding); GO:0005975(carbohydrate metabolic process); GO:0003824(catalytic activity); GO:0016832(aldehyde-lyase activity); GO:0005575(cellular_component); GO:0046872(metal ion binding); GO:0016829(lyase activity); GO:0006096(glycolytic process); GO:0004332(fructose-bisphosphate aldolase activity)	00010(Glycolysis / Gluconeogenesis); 00030(Pentose phosphate pathway); 00051(Fructose and mannose metabolism); 00680(Methane metabolism); 01230(Biosynthesis of amino acids)	K01624	ec:4.1.2.13	108.316	85.0294	114.179	63.2147	33.5801	43.2244	74.5906	0.448491	-1.15685	0.31762	-3.64224	0.000270273	0.0113801	down
2674755	MGG_00513	MGG_00513T0	Putative uncharacterized protein [Source:UniProtKB/TrEMBL;Acc:G4NBQ2]	uncharacterized protein	protein_coding	GO:0003674(molecular_function); GO:0005575(cellular_component); GO:0007275(multicellular organism development)	NA	NA	NA	17.5122	27.9104	12.6865	2.03918	0	2.27497	10.4039	0.0768399	-3.702	1.01657	-3.64165	0.000270891	0.0113801	down
2680642	MGG_09628	MGG_09628T0	Putative uncharacterized protein [Source:UniProtKB/TrEMBL;Acc:G5EGV8]	uncharacterized protein	protein_coding	GO:0008150(biological_process); GO:0005575(cellular_component)	NA	NA	NA	26.5927	25.3141	46.5173	126.429	68.7593	67.1116	60.1207	2.63122	1.39573	0.38368	3.63776	0.000275021	0.0114284	up
2684019	MGG_05956	MGG_05956T0	Glutamyl-tRNA synthetase [Source:UniProtKB/TrEMBL;Acc:G4N4B9]	glutamyl-tRNA synthetase	protein_coding	GO:0005739(mitochondrion); GO:0005737(cytoplasm); GO:0005524(ATP binding); GO:0000166(nucleotide binding); GO:0006412(translation); GO:0016874(ligase activity); GO:0017102(methionyl glutamyl tRNA synthetase complex); GO:0006418(tRNA aminoacylation for protein translation); GO:0006424(glutamyl-tRNA aminoacylation); GO:0004818(glutamate-tRNA ligase activity); GO:0004812(aminoacyl-tRNA ligase activi…	00860(Porphyrin metabolism); 00970(Aminoacyl-tRNA biosynthesis); 01240(Biosynthesis of cofactors)	K01885	ec:6.1.1.17	335.976	370.625	404.157	250.819	207.877	214.985	297.406	0.604436	-0.726338	0.199678	-3.63755	0.000275246	0.0114284	none
2683896	MGG_07969	NA	NA	uncharacterized protein	NA	NA	NA	NA	NA	480.614	396.588	248.898	242.663	111.934	113.748	265.741	0.412455	-1.27769	0.351319	-3.63684	0.000276003	0.0114284	down
2677608	MGG_04118	MGG_04118T0	Fatty acid synthase beta subunit dehydratase [Source:UniProtKB/TrEMBL;Acc:G4NIT9]	fatty acid synthase beta subunit dehydratase	protein_coding	GO:0005739(mitochondrion); GO:0008152(metabolic process); GO:0005811(lipid droplet); GO:0016740(transferase activity); GO:0016491(oxidoreductase activity); GO:0055114(oxidation-reduction process); GO:0016409(palmitoyltransferase activity); GO:0006633(fatty acid biosynthetic process); GO:0004312(fatty acid synthase activity); GO:0019171(3-hydroxyacyl-[acyl-carrier-protein] dehydratase activity); G…	00061(Fatty acid biosynthesis); 01212(Fatty acid metabolism)	K00668	ec:2.3.1.86	526.016	898.326	877.183	342.583	356.589	480.018	580.119	0.513654	-0.961133	0.264367	-3.6356	0.000277333	0.0114288	none
2676538	MGG_03711	MGG_03711T0	Putative uncharacterized protein [Source:UniProtKB/TrEMBL;Acc:G4N6I1]	uncharacterized protein	protein_coding	GO:0008270(zinc ion binding); GO:0005634(nucleus); GO:0006355(regulation of transcription, DNA-templated); GO:0003700(DNA-binding transcription factor activity); GO:0000981(DNA-binding transcription factor activity, RNA polymerase II-specific); GO:0006357(regulation of transcription by RNA polymerase II); GO:0042025(host cell nucleus)	NA	NA	NA	151.124	157.077	115.387	169.252	498.904	345.795	239.59	2.40036	1.26325	0.34828	3.62712	0.000286599	0.0117546	up
2674603	MGG_00184	MGG_00184T0	Putative uncharacterized protein [Source:UniProtKB/TrEMBL;Acc:G4NDX0]	uncharacterized protein	protein_coding	GO:0003677(DNA binding); GO:0005634(nucleus); GO:0006355(regulation of transcription, DNA-templated); GO:0043565(sequence-specific DNA binding); GO:0003700(DNA-binding transcription factor activity); GO:0006357(regulation of transcription by RNA polymerase II); GO:0000981(DNA-binding transcription factor activity, RNA polymerase II-specific)	NA	NA	NA	97.2902	105.8	105.117	165.174	212.674	167.21	142.211	1.76817	0.822259	0.227334	3.61696	0.000298088	0.0120544	none
2681777	MGG_10150	NA	NA	pH-response transcription factor pacC/RIM101	NA	NA	NA	NA	NA	686.22	608.188	654.263	360.935	438.14	434.519	530.378	0.634642	-0.655985	0.181363	-3.61697	0.00029807	0.0120544	none
2684086	MGG_05889	MGG_05889T0	Lactose permease [Source:UniProtKB/TrEMBL;Acc:G4N3Y6]	lactose permease	protein_coding	GO:0016021(integral component of membrane); GO:0006810(transport); GO:0055085(transmembrane transport); GO:0016020(membrane); GO:0022891(GO_0022891); GO:0022857(transmembrane transporter activity)	NA	NA	NA	608.388	460.847	434.967	267.133	323.009	170.623	377.494	0.503684	-0.989408	0.273407	-3.61882	0.000295955	0.0120544	none
2679000	MGG_08778	MGG_08778T0	Aromatic ring-opening dioxygenase [Source:UniProtKB/TrEMBL;Acc:G4NFM2]	aromatic ring-opening dioxygenase	protein_coding	GO:0008270(zinc ion binding); GO:0016491(oxidoreductase activity); GO:0008198(ferrous iron binding); GO:0055114(oxidation-reduction process); GO:0016702(oxidoreductase activity, acting on single donors with incorporation of molecular oxygen, incorporation of two atoms of oxygen); GO:0006725(cellular aromatic compound metabolic process); GO:0051213(dioxygenase activity); GO:0016701(oxidoreductase …	NA	NA	NA	17.5122	44.7865	21.1442	89.724	158.306	42.0869	62.26	3.46309	1.79206	0.497636	3.60115	0.000316814	0.0127521	up
2676378	MGG_10846	MGG_10846T0	Putative uncharacterized protein [Source:UniProtKB/TrEMBL;Acc:G4N396]	uncharacterized protein	protein_coding	GO:0003674(molecular_function); GO:0008150(biological_process); GO:0005575(cellular_component)	NA	NA	NA	47.9965	43.4883	37.4555	8.15673	12.7924	19.3372	28.2045	0.327094	-1.61222	0.448697	-3.59312	0.000326742	0.0130909	down
2684166	MGG_05809	MGG_05809T0	Alpha-N-arabinofuranosidase A [Source:UniProtKB/TrEMBL;Acc:G4N0I3]	alpha-N-arabinofuranosidase A	protein_coding	GO:0046373(L-arabinose metabolic process); GO:0046556(alpha-L-arabinofuranosidase activity); GO:0005575(cellular_component); GO:0016787(hydrolase activity); GO:0031222(arabinan catabolic process)	00520(Amino sugar and nucleotide sugar metabolism)	K01209	ec:3.2.1.55	599.308	443.321	585.997	348.7	334.202	260.484	428.669	0.577087	-0.793139	0.221086	-3.58747	0.000333897	0.0133159	none
2684295	MGG_06195	MGG_06195T0	Putative uncharacterized protein [Source:UniProtKB/TrEMBL;Acc:G4N0E0]	uncharacterized protein	protein_coding	GO:0003674(molecular_function); GO:0008150(biological_process); GO:0005575(cellular_component)	NA	NA	NA	105.722	109.694	99.6799	138.664	223.867	229.772	151.233	1.89329	0.920892	0.256929	3.58423	0.000338076	0.0133594	none
12987207	MGG_14971	NA	NA	elongation factor 3	NA	NA	NA	K03235	NA	1637.07	1528.58	1837.74	1209.24	882.677	1019.19	1352.41	0.621185	-0.686906	0.191601	-3.58508	0.000336977	0.0133594	none
2677438	MGG_04212	MGG_04212T0	L-ornithine 5-monooxygenase (L-ornithine N(5)-oxygenase) [Source:UniProtKB/TrEMBL;Acc:G4NF43]	L-ornithine 5-monooxygenase (L-ornithine N(5)-oxygenase)	protein_coding	GO:0055114(oxidation-reduction process); GO:0004497(monooxygenase activity); GO:0016491(oxidoreductase activity)	NA	K10531	ec:1.14.13.195	174.474	249.896	99.6799	252.859	818.715	409.494	334.186	2.82904	1.50031	0.418994	3.58075	0.000342606	0.0134769	up
2678790	MGG_08526	NA	NA	uncharacterized protein	NA	NA	NA	NA	NA	56.4283	24.665	37.4555	4.07836	6.39621	15.9248	24.158	0.23831	-2.06909	0.579173	-3.57249	0.000353602	0.0138465	down
2681342	MGG_02245	MGG_02245T0	Endoglucanase type F [Source:UniProtKB/TrEMBL;Acc:G4MPQ7]	endoglucanase type F	protein_coding	GO:0005975(carbohydrate metabolic process); GO:0008152(metabolic process); GO:0031176(endo-1,4-beta-xylanase activity); GO:0045493(xylan catabolic process); GO:0016787(hydrolase activity); GO:0005576(extracellular region); GO:0003824(catalytic activity); GO:0030248(cellulose binding); GO:0004553(hydrolase activity, hydrolyzing O-glycosyl compounds); GO:0043169(cation binding); GO:0016798(hydrolas…	NA	K01181	ec:3.2.1.8	113.505	77.2405	138.344	44.862	52.7687	50.0493	79.4616	0.449986	-1.15205	0.322752	-3.56946	0.000357723	0.0139448	down
2678638	MGG_08342	NA	NA	phosphorylcholine phosphatase	NA	NA	NA	K21830	NA	116.748	75.2933	96.6593	57.0971	33.5801	38.6745	69.6754	0.441358	-1.17998	0.331039	-3.56446	0.000364602	0.0141492	down
5050109	MGG_12733	NA	NA	uncharacterized protein	NA	NA	NA	K19356	ec:1.14.99.54	22.7011	14.9288	15.7071	0	0	2.27497	9.26867	0.0547007	-4.1923	1.17892	-3.55604	0.000376491	0.0145453	down
5051019	MGG_12424	NA	NA	C6 transcription factor	NA	NA	NA	NA	NA	90.8042	119.431	106.929	171.291	235.061	174.035	149.592	1.8298	0.871682	0.245265	3.55405	0.000379352	0.0145907	none
5049018	MGG_13801	NA	NA	beta-galactosidase	NA	NA	00052(Galactose metabolism); 00511(Other glycan degradation); 00600(Sphingolipid metabolism)	K01190	ec:3.2.1.23	162.15	149.288	190.902	112.155	78.3536	78.4864	128.556	0.529402	-0.917563	0.258958	-3.5433	0.000395158	0.0150653	none
2680915	MGG_09945	MGG_09945T0	Averantin oxidoreductase [Source:UniProtKB/TrEMBL;Acc:G4MRL4]	averantin oxidoreductase	protein_coding	GO:0046872(metal ion binding); GO:0009055(electron transfer activity); GO:0020037(heme binding); GO:0005506(iron ion binding); GO:0016491(oxidoreductase activity); GO:0055114(oxidation-reduction process); GO:0004497(monooxygenase activity); GO:0016705(oxidoreductase activity, acting on paired donors, with incorporation or reduction of molecular oxygen)	NA	NA	NA	33.7273	48.681	35.6431	0	11.1934	15.9248	24.1949	0.249774	-2.0013	0.564816	-3.54329	0.000395173	0.0150653	down
2683606	MGG_07686	NA	NA	endoglucanase II	NA	NA	NA	K22032	ec:1.14.99.56	64.2116	31.1558	80.9522	16.3135	15.9905	22.7497	38.5622	0.316759	-1.65854	0.46838	-3.54102	0.000398586	0.0151288	down
2675975	MGG_05723	MGG_05723T0	Fluconazole resistance protein 1 [Source:UniProtKB/TrEMBL;Acc:G4MPH5]	fluconazole resistance protein 1	protein_coding	GO:0016021(integral component of membrane); GO:0055085(transmembrane transport); GO:0016020(membrane); GO:0022857(transmembrane transporter activity)	NA	NA	NA	105.722	124.623	127.469	177.409	446.136	204.747	197.684	2.31571	1.21145	0.342355	3.53859	0.000402276	0.0152022	up
12986332	MGG_16402	NA	NA	uncharacterized protein	NA	NA	NA	NA	NA	88.8584	78.5387	67.6615	142.743	172.698	125.123	112.604	1.86996	0.903005	0.255594	3.53296	0.000410933	0.0154618	none
2678280	MGG_08014	MGG_08014T0	Putative uncharacterized protein [Source:UniProtKB/TrEMBL;Acc:G4MX61]	uncharacterized protein	protein_coding	GO:0016020(membrane); GO:0016021(integral component of membrane)	NA	NA	NA	24.6469	18.8233	22.3525	0	7.99526	2.27497	12.6821	0.159924	-2.64454	0.750073	-3.52571	0.000422352	0.0158227	down
2675572	MGG_05120	MGG_05120T0	Putative uncharacterized protein [Source:UniProtKB/TrEMBL;Acc:G4N4H3]	uncharacterized protein	protein_coding	GO:0003674(molecular_function); GO:0005575(cellular_component)	NA	NA	NA	22.0525	41.5411	22.9566	50.9796	79.9526	84.1738	50.276	2.51086	1.32818	0.376885	3.5241	0.000424932	0.0158507	up
12986318	MGG_16395	NA	NA	ATP-dependent Zn protease	NA	NA	NA	NA	NA	225.713	219.389	196.339	299.76	508.499	352.62	300.387	1.812	0.857583	0.243469	3.52235	0.000427737	0.0158868	none
2685009	MGG_06836	MGG_06836T0	Deoxyribodipyrimidine photo-lyase [Source:UniProtKB/TrEMBL;Acc:G4MMG2]	deoxyribodipyrimidine photo-lyase	protein_coding	GO:0006281(DNA repair); GO:0016829(lyase activity); GO:0003913(DNA photolyase activity); GO:0018298(protein-chromophore linkage)	NA	K01669	ec:4.1.99.3	17.5122	27.9104	43.4967	0	3.1981	10.2374	17.0591	0.170936	-2.54847	0.725048	-3.5149	0.000439917	0.0162694	down
2676592	MGG_03670	MGG_03670T0	Subtilisin-like proteinase Spm1 [Source:UniProtKB/Swiss-Prot;Acc:P58371]	subtilisin-like proteinase Spm1	protein_coding	GO:0016787(hydrolase activity); GO:0008233(peptidase activity); GO:0006508(proteolysis); GO:0008236(serine-type peptidase activity); GO:0005773(vacuole); GO:0004252(serine-type endopeptidase activity)	04138(Autophagy - yeast)	K01336	ec:3.4.21.48	1254.4	1406.56	1249.93	1882.17	2190.7	1821.11	1634.14	1.50691	0.591596	0.168381	3.51345	0.000442334	0.0162892	none
2676097	MGG_05338	MGG_05338T0	Putative uncharacterized protein [Source:UniProtKB/TrEMBL;Acc:G4MKH3]	uncharacterized protein	protein_coding	GO:0003674(molecular_function); GO:0008150(biological_process); GO:0005575(cellular_component); GO:0005515(protein binding)	NA	NA	NA	40.2133	30.5067	41.0802	14.2743	9.59431	12.5123	24.6969	0.323285	-1.62912	0.464182	-3.50966	0.000448683	0.016453	down
2676414	MGG_03141	MGG_03141T0	Putative uncharacterized protein [Source:UniProtKB/TrEMBL;Acc:G4NAU5]	uncharacterized protein	protein_coding	GO:0003674(molecular_function); GO:0008150(biological_process); GO:0005575(cellular_component)	NA	NA	NA	32.4301	27.2613	39.2678	55.0579	92.745	72.799	53.2602	2.23886	1.16277	0.331973	3.5026	0.000460748	0.0166833	up
2675641	MGG_04994	MGG_04994T0	Plasma membrane H+-ATPase [Source:UniProtKB/TrEMBL;Acc:G4N3L2]	plasma membrane H+-ATPase	protein_coding	GO:0046872(metal ion binding); GO:0016021(integral component of membrane); GO:0005524(ATP binding); GO:0043581(obsolete mycelium development); GO:0006200(obsolete ATP catabolic process); GO:0000166(nucleotide binding); GO:0008152(metabolic process); GO:0016787(hydrolase activity); GO:0016020(membrane); GO:0003824(catalytic activity); GO:0016887(ATPase activity); GO:0015662(ion transmembrane trans…	00190(Oxidative phosphorylation)	K01535	ec:7.1.2.1	376.837	328.434	436.779	899.279	593.248	566.467	533.508	1.79817	0.846526	0.241637	3.50329	0.000459544	0.0166833	none
12986171	MGG_15501	NA	NA	uncharacterized protein; hypothetical protein, variant	NA	NA	NA	NA	NA	22.7011	26.6123	21.1442	4.07836	3.1981	6.82491	14.0932	0.209236	-2.2568	0.643945	-3.50465	0.000457216	0.0166833	down
2676193	MGG_05381	MGG_05381T0	Beta-1,6-galactanase [Source:UniProtKB/TrEMBL;Acc:G4MKY3]	beta-1,6-galactanase	protein_coding	GO:0005975(carbohydrate metabolic process); GO:0003824(catalytic activity); GO:0004553(hydrolase activity, hydrolyzing O-glycosyl compounds); GO:0043169(cation binding); GO:0005575(cellular_component); GO:0016787(hydrolase activity); GO:0008152(metabolic process); GO:0016798(hydrolase activity, acting on glycosyl bonds)	00500(Starch and sucrose metabolism)	K01179	ec:3.2.1.4	163.448	89.573	100.284	55.0579	47.9716	55.7367	85.3451	0.449836	-1.15253	0.329328	-3.49963	0.000465899	0.0167995	down
2678734	MGG_08499	NA	NA	manganese lipoxygenase	NA	NA	00590(Arachidonic acid metabolism)	K08022	ec:1.13.11.33	9.08042	12.9816	10.2701	53.0187	31.981	21.6122	23.1573	3.22139	1.68768	0.482884	3.49501	0.000474049	0.0170225	up
5050146	MGG_12775	MGG_12775T0	Voltage-gated K+ channel beta subunit [Source:UniProtKB/TrEMBL;Acc:G4N5Y7]	voltage-gated K+ channel beta subunit	protein_coding	GO:0055085(transmembrane transport); GO:0006813(potassium ion transport); GO:0005216(ion channel activity); GO:0005244(voltage-gated ion channel activity); GO:0034765(regulation of ion transmembrane transport); GO:0006811(ion transport); GO:0034220(ion transmembrane transport)	NA	NA	NA	68.1032	64.2589	69.4739	34.6661	27.1839	30.7121	49.0663	0.456053	-1.13273	0.324958	-3.48576	0.00049074	0.017549	down
2682434	MGG_02881	MGG_02881T0	Deoxyribose-phosphate aldolase 2 [Source:UniProtKB/TrEMBL;Acc:G5EHK4]	deoxyribose-phosphate aldolase 2	protein_coding	NA	NA	K09142	NA	46.0507	58.4172	74.911	28.5486	20.7877	22.7497	41.9108	0.397365	-1.33146	0.382266	-3.48308	0.000495682	0.017637	down
2682922	MGG_10712	MGG_10712T0	Cellulose 1,4-beta-cellobiosidase [Source:UniProtKB/TrEMBL;Acc:G4NIA4]	cellulose 1,4-beta-cellobiosidase	protein_coding	GO:0005975(carbohydrate metabolic process); GO:0004553(hydrolase activity, hydrolyzing O-glycosyl compounds); GO:0030245(cellulose catabolic process); GO:0003674(molecular_function); GO:0008150(biological_process); GO:0005575(cellular_component); GO:0016787(hydrolase activity); GO:0008152(metabolic process); GO:0016798(hydrolase activity, acting on glycosyl bonds); GO:0000272(polysaccharide catab…	00500(Starch and sucrose metabolism)	K01225	ec:3.2.1.91	326.895	129.167	158.28	8.15673	0	23.8872	107.731	0.0531324	-4.23426	1.21597	-3.48222	0.000497275	0.017637	down
2676092	MGG_05709	MGG_05709T0	Putative uncharacterized protein [Source:UniProtKB/TrEMBL;Acc:G4MPF4]	uncharacterized protein	protein_coding	GO:0046983(protein dimerization activity)	NA	NA	NA	166.042	156.428	162.508	214.114	394.966	285.509	229.928	1.84886	0.886638	0.255983	3.46366	0.000532885	0.0187463	none
2676798	MGG_03593	MGG_03593T0	Putative uncharacterized protein [Source:UniProtKB/TrEMBL;Acc:G4N7D9]	uncharacterized protein	protein_coding	GO:0043581(obsolete mycelium development); GO:0003674(molecular_function); GO:0005575(cellular_component)	NA	NA	NA	1898.46	1804.44	1646.23	1356.06	654.012	700.69	1343.31	0.505743	-0.983523	0.283911	-3.4642	0.000531817	0.0187463	none
2680187	MGG_09215	NA	NA	uncharacterized protein	NA	NA	NA	NA	NA	43.4563	48.681	42.2884	69.3322	139.118	84.1738	71.1749	2.18244	1.12594	0.325629	3.45774	0.000544737	0.0190087	up
2679299	MGG_01585	MGG_01585T0	Translocator protein [Source:UniProtKB/TrEMBL;Acc:G4MTW2]	translocator protein	protein_coding	GO:0016021(integral component of membrane); GO:0003674(molecular_function); GO:0008150(biological_process); GO:0016020(membrane); GO:1905691(lipid droplet disassembly)	NA	K05770	NA	51.8881	49.3301	33.8308	75.4497	110.335	94.4112	69.2074	2.08631	1.06095	0.30677	3.45847	0.000543258	0.0190087	up
2680382	MGG_09383	NA	NA	NIMA-interacting protein TinC, variant; NIMA-interacting protein TinC	NA	NA	NA	NA	NA	202.364	80.4859	114.783	61.1755	51.1697	51.1868	93.5274	0.409541	-1.28792	0.373708	-3.44632	0.000568268	0.0197502	down
2677039	MGG_10892	MGG_10892T0	Putative uncharacterized protein [Source:UniProtKB/TrEMBL;Acc:G4MQE6]	uncharacterized protein	protein_coding	GO:0003674(molecular_function); GO:0005575(cellular_component)	NA	NA	NA	21.4039	18.8233	16.3113	2.03918	3.1981	3.41245	10.8647	0.158194	-2.66023	0.772628	-3.4431	0.000575095	0.0199075	down
2680308	MGG_09372	MGG_09372T0	Putative uncharacterized protein [Source:UniProtKB/TrEMBL;Acc:G4NI16]	uncharacterized protein	protein_coding	NA	NA	NA	NA	383.324	389.448	195.735	434.346	1600.65	640.404	607.318	2.76352	1.46651	0.42699	3.43452	0.000593594	0.0203848	up
5051067	MGG_12473	NA	NA	nitrogen metabolic regulation protein	NA	NA	NA	NA	NA	398.241	382.957	349.786	517.952	783.536	583.529	502.667	1.66795	0.738078	0.214878	3.43488	0.000592823	0.0203848	none
2682350	MGG_02610	MGG_02610T0	Putative uncharacterized protein [Source:UniProtKB/TrEMBL;Acc:G4NJM7]	uncharacterized protein	protein_coding	GO:0008152(metabolic process); GO:0016787(hydrolase activity); GO:0044271(cellular nitrogen compound biosynthetic process)	NA	NA	NA	145.935	163.568	130.49	26.5094	43.1744	97.8236	101.25	0.391155	-1.35419	0.395451	-3.42441	0.000616131	0.0210751	down
12987368	MGG_15430	MGG_15430T0	Endo-1,4-beta-xylanase A [Source:UniProtKB/TrEMBL;Acc:G4NIM7]	endo-1,4-beta-xylanase A	protein_coding	GO:0005975(carbohydrate metabolic process); GO:0008152(metabolic process); GO:0031176(endo-1,4-beta-xylanase activity); GO:0045493(xylan catabolic process); GO:0016787(hydrolase activity); GO:0005576(extracellular region); GO:0003824(catalytic activity); GO:0030248(cellulose binding); GO:0004553(hydrolase activity, hydrolyzing O-glycosyl compounds); GO:0043169(cation binding); GO:0016798(hydrolas…	NA	K01181	ec:3.2.1.8	23.3497	10.3853	20.5401	0	4.79716	0	9.84537	0.0850051	-3.55631	1.04111	-3.41587	0.000635797	0.0216622	down
12985728	MGG_16894	MGG_16894T0	Putative uncharacterized protein [Source:UniProtKB/TrEMBL;Acc:G4N5D2]	uncharacterized protein	protein_coding	GO:0052051(obsolete interaction with host via protein secreted by type II secretion system); GO:0003674(molecular_function); GO:0005575(cellular_component)	NA	NA	NA	26.5927	16.8761	18.1236	6.11755	3.1981	2.27497	12.1972	0.175621	-2.50946	0.734944	-3.41449	0.000639006	0.0216861	down
12987293	MGG_17822	NA	NA	uncharacterized protein	NA	NA	NA	NA	NA	207.552	362.836	306.289	159.056	163.103	151.285	225.02	0.539515	-0.890266	0.261169	-3.40877	0.000652553	0.0220594	none
2683033	MGG_07287	MGG_07287T0	Lysophospholipase Plb3 [Source:UniProtKB/TrEMBL;Acc:G4MUL5]	lysophospholipase Plb3	protein_coding	GO:0043581(obsolete mycelium development); GO:0008152(metabolic process); GO:0009395(phospholipid catabolic process); GO:0004620(phospholipase activity); GO:0005575(cellular_component); GO:0016020(membrane); GO:0016021(integral component of membrane); GO:0016787(hydrolase activity); GO:0006629(lipid metabolic process); GO:0004622(lysophospholipase activity); GO:0016042(lipid catabolic process); G…	00564(Glycerophospholipid metabolism)	K13333	ec:3.1.1.5	71.9948	50.6282	83.3687	106.037	174.297	136.498	103.804	2.0287	1.02056	0.299684	3.40543	0.000660588	0.0222441	up
2683536	MGG_07616	MGG_07616T0	Succinate/fumarate mitochondrial transporter [Source:UniProtKB/TrEMBL;Acc:G4N2M2]	succinate/fumarate mitochondrial transporter	protein_coding	GO:0016021(integral component of membrane); GO:0005743(mitochondrial inner membrane); GO:0006810(transport); GO:0055085(transmembrane transport); GO:0016020(membrane); GO:0005739(mitochondrion); GO:0005347(ATP transmembrane transporter activity); GO:0015867(ATP transport)	NA	K15100	NA	223.768	375.817	204.193	827.908	394.966	515.28	423.655	2.159	1.11036	0.326218	3.40374	0.0006647	0.0222958	up
2683383	MGG_07463	NA	NA	D-galacturonic acid reductase	NA	NA	00040(Pentose and glucuronate interconversions)	K18106	NA	241.28	201.215	183.653	130.508	113.533	120.573	165.127	0.581219	-0.782847	0.230486	-3.39651	0.00068252	0.0228051	none
2684214	MGG_06095	MGG_06095T0	Cysteine dioxygenase [Source:UniProtKB/TrEMBL;Acc:G4N596]	cysteine dioxygenase	protein_coding	GO:0005506(iron ion binding); GO:0055114(oxidation-reduction process); GO:0016702(oxidoreductase activity, acting on single donors with incorporation of molecular oxygen, incorporation of two atoms of oxygen); GO:0046439(L-cysteine metabolic process); GO:0017172(cysteine dioxygenase activity); GO:0005575(cellular_component); GO:0046872(metal ion binding); GO:0016491(oxidoreductase activity); GO:0…	00270(Cysteine and methionine metabolism); 00430(Taurine and hypotaurine metabolism)	K00456	ec:1.13.11.20	84.3182	146.692	119.616	175.37	350.192	214.985	181.862	2.11444	1.08028	0.318408	3.39274	0.000691963	0.0230317	up
2682049	MGG_10482	MGG_10482T0	Putative uncharacterized protein [Source:UniProtKB/TrEMBL;Acc:G4MYF9]	uncharacterized protein	protein_coding	GO:0016772(transferase activity, transferring phosphorus-containing groups); GO:0102193(protein-ribulosamine 3-kinase activity)	NA	K15523	ec:2.7.1.172	53.1853	70.7497	47.1214	12.2351	28.7829	23.8872	39.3269	0.388151	-1.36531	0.402835	-3.38925	0.000700835	0.0232376	down
2677852	MGG_04628	MGG_04628T0	Cytochrome P450 51 [Source:UniProtKB/TrEMBL;Acc:G4MRP8]	cytochrome P450 51	protein_coding	GO:0046872(metal ion binding); GO:0005783(endoplasmic reticulum); GO:0009055(electron transfer activity); GO:0020037(heme binding); GO:0005506(iron ion binding); GO:0006696(ergosterol biosynthetic process); GO:0055114(oxidation-reduction process); GO:0004497(monooxygenase activity); GO:0016705(oxidoreductase activity, acting on paired donors, with incorporation or reduction of molecular oxygen); …	00100(Steroid biosynthesis)	K05917	ec:1.14.14.154	10.3776	1.29816	5.43709	40.7836	23.9858	17.0623	16.4908	4.70357	2.23376	0.661273	3.37796	0.000730257	0.0240291	up
2681137	MGG_01922	MGG_01922T0	Polysaccharide deacetylase [Source:UniProtKB/TrEMBL;Acc:G4NG16]	polysaccharide deacetylase	protein_coding	GO:0005975(carbohydrate metabolic process); GO:0003824(catalytic activity); GO:0016810(hydrolase activity, acting on carbon-nitrogen (but not peptide) bonds); GO:0005575(cellular_component)	NA	NA	NA	22.0525	28.5595	24.1648	4.07836	9.59431	4.54994	15.4999	0.242973	-2.04113	0.604216	-3.37815	0.000729753	0.0240291	down
2683722	MGG_07795	NA	NA	pisatin demethylase	NA	NA	NA	NA	NA	53.8339	44.1374	37.4555	83.6065	100.74	83.0364	67.135	1.97519	0.981992	0.290974	3.37484	0.000738576	0.0242107	none
2675310	MGG_05246	MGG_05246T0	Alpha-L-rhamnosidase A [Source:UniProtKB/TrEMBL;Acc:G4N5D8]	alpha-L-rhamnosidase A	protein_coding	GO:0008152(metabolic process); GO:0003824(catalytic activity)	NA	NA	NA	52.5367	64.908	40.4761	132.547	107.137	85.3113	80.4859	2.04174	1.0298	0.30558	3.36998	0.000751723	0.0245191	up
2679133	MGG_01391	MGG_01391T0	Ent-kaurene oxidase [Source:UniProtKB/TrEMBL;Acc:G4MZG8]	ent-kaurene oxidase	protein_coding	GO:0046872(metal ion binding); GO:0009055(electron transfer activity); GO:0020037(heme binding); GO:0005506(iron ion binding); GO:0055114(oxidation-reduction process); GO:0004497(monooxygenase activity); GO:0016705(oxidoreductase activity, acting on paired donors, with incorporation or reduction of molecular oxygen); GO:0005575(cellular_component); GO:0016491(oxidoreductase activity); GO:0016020(…	NA	NA	NA	235.442	178.497	181.236	320.152	551.673	288.921	292.654	1.9492	0.962885	0.285784	3.36928	0.00075365	0.0245191	none
2682278	MGG_10665	NA	NA	uncharacterized protein	NA	NA	NA	K06867	NA	88.8584	97.362	82.7645	55.0579	33.5801	45.4994	67.1871	0.495076	-1.01428	0.302002	-3.35852	0.000783613	0.0253984	down
2676318	MGG_10799	NA	NA	acid phosphatase PHO1	NA	NA	00730(Thiamine metabolism); 00740(Riboflavin metabolism)	K01078	ec:3.1.3.2	183.554	147.99	142.572	91.7632	97.5422	52.3243	119.291	0.502772	-0.992025	0.295644	-3.35548	0.000792285	0.0255837	none
2684699	MGG_06544	MGG_06544T0	Putative uncharacterized protein [Source:UniProtKB/TrEMBL;Acc:G4N6L0]	uncharacterized protein	protein_coding	GO:0046872(metal ion binding); GO:0009055(electron transfer activity); GO:0020037(heme binding); GO:0005506(iron ion binding); GO:0016491(oxidoreductase activity); GO:0055114(oxidation-reduction process); GO:0004497(monooxygenase activity); GO:0016705(oxidoreductase activity, acting on paired donors, with incorporation or reduction of molecular oxygen)	NA	NA	NA	51.2395	86.3276	62.2244	89.724	262.245	136.498	114.71	2.45062	1.29314	0.386143	3.34887	0.000811404	0.0260879	up
2682019	MGG_10407	MGG_10407T0	Putative uncharacterized protein [Source:UniProtKB/TrEMBL;Acc:G4NGA1]	uncharacterized protein	protein_coding	GO:0008150(biological_process); GO:0005575(cellular_component); GO:0016020(membrane); GO:0016021(integral component of membrane)	NA	NA	NA	83.6696	44.1374	79.1398	38.7445	20.7877	22.7497	48.2048	0.388978	-1.36224	0.406879	-3.34801	0.000813927	0.0260879	down
5048661	MGG_14117	NA	NA	uncharacterized protein	NA	NA	NA	NA	NA	33.7273	44.1374	32.0184	42.8228	119.929	102.374	62.5014	2.43868	1.2861	0.384428	3.34549	0.000821379	0.0262296	up
2685131	MGG_06958	MGG_06958T0	Hsp70-like protein [Source:UniProtKB/TrEMBL;Acc:G4MNH8]	hsp70-like protein	protein_coding	GO:0005524(ATP binding); GO:0043581(obsolete mycelium development); GO:0000166(nucleotide binding); GO:0005575(cellular_component)	03040(Spliceosome); 04141(Protein processing in endoplasmic reticulum); 04144(Endocytosis)	K03283	NA	1982.77	1310.49	1346.59	3644.02	2350.61	2389.85	2170.72	1.80619	0.852946	0.25506	3.3441	0.000825491	0.026264	none
2681832	MGG_10234	NA	NA	uncharacterized protein	NA	NA	NA	NA	NA	68.1032	80.4859	72.4945	18.3526	36.7782	40.9494	52.8606	0.447302	-1.16068	0.347509	-3.33999	0.000837803	0.0265581	down
12984191	MGG_15241	MGG_15241T0	Alpha/beta hydrolase fold protein [Source:UniProtKB/TrEMBL;Acc:G4N3X6]	alpha/beta hydrolase fold protein	protein_coding	GO:0008152(metabolic process); GO:0016787(hydrolase activity)	NA	NA	NA	29.1871	24.016	18.7277	38.7445	65.5611	62.5616	39.7997	2.34867	1.23185	0.369758	3.33149	0.000863818	0.0271836	up
5049662	MGG_11870	NA	NA	uncharacterized protein	NA	NA	NA	NA	NA	162.15	146.043	131.094	99.9199	71.9574	72.799	113.994	0.551191	-0.859377	0.257889	-3.33235	0.000861148	0.0271836	none
2677126	MGG_04202	MGG_04202T0	MAS3 protein [Source:UniProtKB/TrEMBL;Acc:G4NF50]	MAS3 protein	protein_coding	GO:0003674(molecular_function); GO:0005575(cellular_component); GO:0009405(pathogenesis)	NA	NA	NA	173.177	125.921	96.0552	63.2147	36.7782	76.2114	95.2263	0.449076	-1.15497	0.348343	-3.3156	0.000914461	0.028673	down
2676578	MGG_12737	NA	NA	creatine transporter	NA	NA	NA	K05034	NA	50.5909	11.0344	6.64533	2.03918	3.1981	1.13748	12.4409	0.0903523	-3.46829	1.04747	-3.31111	0.000929273	0.0290322	down
2674824	MGG_00494	MGG_00494T0	Transcriptional regulatory protein Pro-1 [Source:UniProtKB/TrEMBL;Acc:G4NBS6]	transcriptional regulatory protein Pro-1	protein_coding	GO:0008270(zinc ion binding); GO:0005634(nucleus); GO:0006355(regulation of transcription, DNA-templated); GO:0003700(DNA-binding transcription factor activity); GO:0000981(DNA-binding transcription factor activity, RNA polymerase II-specific); GO:0006357(regulation of transcription by RNA polymerase II); GO:0042025(host cell nucleus)	NA	K21547	NA	321.706	409.569	276.687	415.993	764.347	693.865	480.361	1.86331	0.89787	0.271882	3.30243	0.000958524	0.0298384	none
2682785	MGG_02654	MGG_02654T0	Putative uncharacterized protein [Source:UniProtKB/TrEMBL;Acc:G4NJH1]	uncharacterized protein	protein_coding	GO:0044271(cellular nitrogen compound biosynthetic process); GO:0003674(molecular_function); GO:0005575(cellular_component); GO:0016020(membrane); GO:0016021(integral component of membrane)	NA	NA	NA	149.178	164.866	192.11	91.7632	67.1602	112.611	129.615	0.540151	-0.888564	0.270555	-3.28423	0.00102262	0.0317195	none
12985446	MGG_15331	NA	NA	uncharacterized protein	NA	NA	NA	NA	NA	5.83741	19.4724	8.45769	24.4702	51.1697	36.3995	24.3011	3.34281	1.74106	0.531723	3.27438	0.00105895	0.0327292	up
2676616	MGG_03539	MGG_03539T0	Putative uncharacterized protein [Source:UniProtKB/TrEMBL;Acc:G4N7Q4]	uncharacterized protein	protein_coding	NA	NA	NA	NA	17.5122	17.5252	12.0824	28.5486	49.5706	40.9494	27.6981	2.55339	1.35241	0.413832	3.26802	0.00108302	0.033262	up
12984508	MGG_14882	NA	NA	epoxide hydrolase 1	NA	NA	NA	K01253	ec:3.3.2.9	49.9423	46.7337	40.4761	71.3714	142.316	78.4864	71.5543	2.13274	1.09271	0.334387	3.2678	0.00108388	0.033262	up
5049139	MGG_13279	NA	NA	potassium/sodium efflux P-type ATPase	NA	NA	NA	K01536	ec:7.2.2.3	1399.03	1298.81	1014.32	717.792	874.682	771.214	1012.64	0.637052	-0.650517	0.199327	-3.26357	0.00110017	0.0335267	none
2683769	MGG_07842	MGG_07842T0	Putative uncharacterized protein [Source:UniProtKB/TrEMBL;Acc:G4N1K2]	uncharacterized protein	protein_coding	NA	NA	NA	NA	300.303	173.304	175.799	89.724	116.731	122.848	163.118	0.510142	-0.971031	0.297538	-3.26355	0.00110025	0.0335267	none
5049100	MGG_13236	MGG_13236T0	Putative uncharacterized protein [Source:UniProtKB/TrEMBL;Acc:G4N4N8]	uncharacterized protein	protein_coding	GO:0046872(metal ion binding); GO:0008270(zinc ion binding); GO:0008150(biological_process); GO:0005575(cellular_component)	NA	NA	NA	35.0245	31.8049	35.039	79.5281	62.363	62.5616	51.0535	1.99127	0.993686	0.305303	3.25475	0.00113493	0.0342219	none
2675548	MGG_04979	MGG_04979T0	GPI mannosyltransferase 4 [Source:UniProtKB/TrEMBL;Acc:G4N3J6]	GPI mannosyltransferase 4	protein_coding	GO:0016740(transferase activity); GO:0006506(GPI anchor biosynthetic process); GO:0031227(intrinsic component of endoplasmic reticulum membrane); GO:0016757(transferase activity, transferring glycosyl groups); GO:0016020(membrane); GO:0016021(integral component of membrane); GO:0005783(endoplasmic reticulum); GO:0005789(endoplasmic reticulum membrane)	00563(Glycosylphosphatidylinositol (GPI)-anchor biosynthesis)	K08098	NA	46.0507	46.7337	68.2656	101.959	126.325	88.7238	79.6764	1.95991	0.970787	0.298122	3.25634	0.0011286	0.0342219	none
2682342	MGG_02602	MGG_02602T0	Putative uncharacterized protein [Source:UniProtKB/TrEMBL;Acc:G4NJN5]	uncharacterized protein	protein_coding	GO:0003674(molecular_function); GO:0008150(biological_process); GO:0005575(cellular_component)	NA	NA	NA	559.095	574.436	507.461	344.622	267.042	401.532	442.364	0.618918	-0.69218	0.212641	-3.25515	0.00113332	0.0342219	none
2678175	MGG_04368	MGG_04368T0	Stage V sporulation protein K [Source:UniProtKB/TrEMBL;Acc:G4MZB8]	stage V sporulation protein K	protein_coding	GO:0005524(ATP binding); GO:0000166(nucleotide binding); GO:0017111(nucleoside-triphosphatase activity)	NA	NA	NA	65.5088	82.4331	80.3481	103.998	147.113	163.798	107.2	1.8327	0.873971	0.268668	3.25298	0.00114203	0.0343165	none
2684177	MGG_05798	MGG_05798T0	Putative uncharacterized protein [Source:UniProtKB/TrEMBL;Acc:G4N0H2]	uncharacterized protein	protein_coding	GO:0008152(metabolic process); GO:0016787(hydrolase activity); GO:0050525(cutinase activity); GO:0005576(extracellular region); GO:0052689(carboxylic ester hydrolase activity)	NA	K08095	ec:3.1.1.74	286.682	288.84	254.939	189.644	164.702	175.173	226.663	0.636465	-0.651847	0.200896	-3.24471	0.00117572	0.035085	none
5050508	MGG_12634	NA	NA	dihydroorotase	NA	NA	00240(Pyrimidine metabolism); 01240(Biosynthesis of cofactors)	K01465	ec:3.5.2.3	50.5909	43.4883	51.9544	24.4702	17.5896	20.4747	34.7614	0.424369	-1.23661	0.381056	-3.24522	0.00117362	0.035085	down
2677492	MGG_03916	MGG_03916T0	Putative uncharacterized protein [Source:UniProtKB/TrEMBL;Acc:G4NH77]	uncharacterized protein	protein_coding	GO:0003674(molecular_function); GO:0008150(biological_process); GO:0005575(cellular_component); GO:0016020(membrane); GO:0016021(integral component of membrane)	NA	NA	NA	14.9178	29.8577	30.8102	50.9796	95.9431	47.7743	45.0471	2.56911	1.36127	0.419832	3.24242	0.0011852	0.0352466	up
2683916	MGG_06059	MGG_06059T0	Arrestin [Source:UniProtKB/TrEMBL;Acc:G4N4Z2]	arrestin	protein_coding	GO:0003674(molecular_function); GO:0005575(cellular_component)	NA	NA	NA	33.7273	43.4883	56.1832	83.6065	99.1412	83.0364	66.5305	1.98886	0.991942	0.306236	3.23914	0.00119891	0.035532	none
2680995	MGG_10038	NA	NA	beta-glucosidase C	NA	NA	00460(Cyanoamino acid metabolism); 00500(Starch and sucrose metabolism)	K05349	ec:3.2.1.21	189.392	110.993	116.595	65.2538	76.7545	68.2491	104.539	0.504846	-0.986086	0.305883	-3.22374	0.0012653	0.0373716	none
2682034	MGG_10422	NA	NA	uncharacterized protein	NA	NA	NA	NA	NA	20.7552	44.1374	38.6637	65.2538	103.938	68.2491	56.8329	2.29225	1.19676	0.371742	3.21933	0.00128489	0.0378211	up
5050310	MGG_13385	MGG_13385T0	Putative uncharacterized protein [Source:UniProtKB/TrEMBL;Acc:G4N0R9]	uncharacterized protein	protein_coding	GO:0008270(zinc ion binding); GO:0005634(nucleus); GO:0006355(regulation of transcription, DNA-templated); GO:0003700(DNA-binding transcription factor activity); GO:0000981(DNA-binding transcription factor activity, RNA polymerase II-specific); GO:0006357(regulation of transcription by RNA polymerase II); GO:0042025(host cell nucleus)	NA	NA	NA	34.3759	31.8049	27.7896	48.9404	73.5564	69.3865	47.6423	2.0619	1.04397	0.324676	3.21543	0.00130251	0.0380809	up
2676893	MGG_03374	MGG_03374T0	Beta-1,6-galactanase [Source:UniProtKB/TrEMBL;Acc:G4N8V8]	beta-1,6-galactanase	protein_coding	GO:0005975(carbohydrate metabolic process); GO:0003824(catalytic activity); GO:0004553(hydrolase activity, hydrolyzing O-glycosyl compounds); GO:0043169(cation binding); GO:0005575(cellular_component); GO:0016787(hydrolase activity); GO:0008152(metabolic process); GO:0016798(hydrolase activity, acting on glycosyl bonds)	NA	NA	NA	1197.32	657.518	712.258	552.618	462.126	329.87	651.952	0.522411	-0.936742	0.291325	-3.21545	0.00130241	0.0380809	none
2679332	MGG_01655	MGG_01655T0	Copper radical oxidase [Source:UniProtKB/TrEMBL;Acc:G4MUE7]	copper radical oxidase	protein_coding	NA	NA	NA	NA	276.304	519.913	259.168	344.622	1559.08	916.812	645.983	2.6745	1.41927	0.442615	3.20655	0.00134338	0.0390968	up
2682074	MGG_10441	NA	NA	lipase 2	NA	NA	NA	NA	NA	34.3759	40.2429	21.7483	75.4497	62.363	68.2491	50.4048	2.13699	1.09558	0.341736	3.20592	0.0013463	0.0390968	up
5049567	MGG_11779	MGG_11779T0	Putative uncharacterized protein [Source:UniProtKB/TrEMBL;Acc:G4MNY3]	uncharacterized protein	protein_coding	GO:0008270(zinc ion binding); GO:0005634(nucleus); GO:0006355(regulation of transcription, DNA-templated); GO:0003700(DNA-binding transcription factor activity); GO:0046872(metal ion binding)	NA	NA	NA	17.5122	39.5939	15.103	36.7053	105.537	65.9741	46.7377	2.90231	1.5372	0.47989	3.20324	0.00135892	0.0392002	up
5050705	MGG_11548	MGG_11548T0	Putative uncharacterized protein [Source:UniProtKB/TrEMBL;Acc:G4NB91]	uncharacterized protein	protein_coding	GO:0016020(membrane); GO:0016021(integral component of membrane)	NA	NA	NA	34.3759	61.0135	36.2472	89.724	99.1412	81.8989	67.0668	2.05434	1.03868	0.324233	3.20349	0.00135771	0.0392002	up
5050895	MGG_12291	NA	NA	uncharacterized protein	NA	NA	00511(Other glycan degradation); 00513(Various types of N-glycan biosynthesis); 00520(Amino sugar and nucleotide sugar metabolism); 00531(Glycosaminoglycan degradation); 00603(Glycosphingolipid biosynthesis - globo and isoglobo series); 00604(Glycosphingolipid biosynthesis - ganglio series)	K12373	ec:3.2.1.52	47.3479	57.119	35.6431	28.5486	14.3915	9.09987	32.025	0.353122	-1.50176	0.469591	-3.19802	0.00138375	0.0397839	down
2674322	MGG_01062	MGG_01062T0	Autophagy-related protein 8 [Source:UniProtKB/Swiss-Prot;Acc:Q51MW4]	uncharacterized protein	protein_coding	GO:0003674(molecular_function); GO:0016020(membrane); GO:0015031(protein transport); GO:0031410(cytoplasmic vesicle); GO:0005773(vacuole); GO:0005774(vacuolar membrane); GO:0009405(pathogenesis); GO:0006914(autophagy); GO:0016239(positive regulation of macroautophagy); GO:0048102(autophagic cell death); GO:0000421(autophagosome membrane)	04136(Autophagy - other); 04138(Autophagy - yeast); 04139(Mitophagy - yeast)	K08341	NA	544.825	584.821	540.084	715.753	1034.59	837.188	709.543	1.55096	0.633161	0.198242	3.19389	0.00140372	0.0402244	none
2677237	MGG_04296	MGG_04296T0	Putative uncharacterized protein [Source:UniProtKB/TrEMBL;Acc:G4NGJ0]	uncharacterized protein	protein_coding	GO:0003674(molecular_function); GO:0005575(cellular_component)	NA	NA	NA	1.2972	5.19264	4.83297	14.2743	23.9858	13.6498	10.5388	4.56091	2.18932	0.68608	3.19106	0.00141752	0.0404859	up
2678600	MGG_08258	MGG_08258T0	Putative uncharacterized protein [Source:UniProtKB/TrEMBL;Acc:G4MXC2]	uncharacterized protein	protein_coding	GO:0016020(membrane); GO:0005215(transporter activity); GO:0006857(oligopeptide transport); GO:0016021(integral component of membrane); GO:0055085(transmembrane transport); GO:0022857(transmembrane transporter activity)	NA	NA	NA	37.6189	69.4515	65.245	122.351	83.1507	164.935	90.4587	2.1597	1.11083	0.348211	3.1901	0.00142223	0.0404868	up
2678559	MGG_08278	MGG_08278T0	Putative uncharacterized protein [Source:UniProtKB/TrEMBL;Acc:G4MXA1]	uncharacterized protein	protein_coding	GO:0016021(integral component of membrane); GO:0009055(electron transfer activity); GO:0005506(iron ion binding); GO:0050660(flavin adenine dinucleotide binding); GO:0016020(membrane); GO:0016491(oxidoreductase activity); GO:0055114(oxidation-reduction process); GO:0006811(ion transport)	NA	NA	NA	47.3479	56.4699	27.7896	71.3714	171.099	79.6239	75.6169	2.45119	1.29348	0.405604	3.18902	0.00142755	0.040505	up
2683818	MGG_07891	MGG_07891T0	CAIB/BAIF family enzyme [Source:UniProtKB/TrEMBL;Acc:G4N217]	CAIB/BAIF family enzyme	protein_coding	GO:0008152(metabolic process); GO:0003824(catalytic activity); GO:0008410(CoA-transferase activity)	NA	NA	NA	12.3234	23.3669	11.4783	36.7053	73.5564	28.4371	30.9779	2.93195	1.55186	0.4883	3.1781	0.00148246	0.0419255	up
2680575	MGG_09668	MGG_09668T0	Gut esterase 1 [Source:UniProtKB/TrEMBL;Acc:G4NKY6]	gut esterase 1	protein_coding	GO:0016787(hydrolase activity); GO:0008150(biological_process); GO:0005575(cellular_component)	NA	NA	NA	146.584	118.133	103.909	81.5673	60.764	56.8742	94.6385	0.534024	-0.905023	0.285037	-3.17511	0.00149781	0.0422216	none
5050383	MGG_13464	NA	NA	laccase	NA	NA	NA	NA	NA	11.6748	17.5252	18.1236	22.431	481.315	77.3489	104.736	12.2799	3.61823	1.14036	3.17288	0.00150933	0.0422408	up
2678795	MGG_08521	MGG_08521T0	Putative uncharacterized protein [Source:UniProtKB/TrEMBL;Acc:G4N5S8]	uncharacterized protein	protein_coding	GO:0003674(molecular_function); GO:0008150(biological_process); GO:0005575(cellular_component)	NA	NA	NA	76.535	56.4699	45.9132	24.4702	17.5896	31.8496	42.1379	0.419509	-1.25323	0.395071	-3.17215	0.00151313	0.0422408	down
2679706	MGG_01454	MGG_01454T0	Putative uncharacterized protein [Source:UniProtKB/TrEMBL;Acc:G4MSI4]	uncharacterized protein	protein_coding	GO:0008150(biological_process); GO:0005575(cellular_component)	NA	NA	NA	356.731	149.937	71.8904	14.2743	54.3678	15.9248	110.521	0.146197	-2.77402	0.874455	-3.17228	0.00151247	0.0422408	down
5048900	MGG_14854	MGG_14854T0	Fmp52-2 [Source:UniProtKB/TrEMBL;Acc:G4N6V9]	fmp52-2	protein_coding	GO:0000166(nucleotide binding); GO:0003824(catalytic activity); GO:0050662(obsolete coenzyme binding)	NA	NA	NA	31.1329	27.9104	26.5813	61.1755	60.764	52.3243	43.3147	2.02537	1.01818	0.321804	3.16399	0.00155624	0.0432786	up
5048946	MGG_13012	NA	NA	uncharacterized protein	NA	NA	NA	K05994	ec:3.4.11.10	147.881	238.861	175.195	99.9199	89.5469	117.161	144.761	0.54812	-0.867436	0.274225	-3.16323	0.00156031	0.0432786	none
2682474	MGG_02921	MGG_02921T0	Putative uncharacterized protein [Source:UniProtKB/TrEMBL;Acc:G5EGY2]	uncharacterized protein	protein_coding	GO:0005737(cytoplasm); GO:0005634(nucleus); GO:0034599(cellular response to oxidative stress); GO:0003729(mRNA binding); GO:0016491(oxidoreductase activity); GO:0055114(oxidation-reduction process); GO:0004032(alditol:NADP+ 1-oxidoreductase activity); GO:0019568(arabinose catabolic process); GO:0042843(D-xylose catabolic process); GO:0004090(carbonyl reductase (NADPH) activity); GO:0047935(glucos…	00561(Glycerolipid metabolism)	K18097	ec:1.1.1.156	396.944	316.751	362.472	279.368	150.311	179.723	280.928	0.56248	-0.830127	0.26267	-3.16034	0.00157586	0.0434314	none
2675370	MGG_04969	MGG_04969T0	Electron transfer protein 1 [Source:UniProtKB/TrEMBL;Acc:G4N3I3]	electron transfer protein 1	protein_coding	GO:0016021(integral component of membrane); GO:0005743(mitochondrial inner membrane); GO:0016020(membrane); GO:0055114(oxidation-reduction process); GO:0006784(heme A biosynthetic process); GO:0016653(oxidoreductase activity, acting on NAD(P)H, heme protein as acceptor); GO:0016627(oxidoreductase activity, acting on the CH-CH group of donors); GO:0003674(molecular_function)	00190(Oxidative phosphorylation); 00860(Porphyrin metabolism); 01240(Biosynthesis of cofactors)	K02259	ec:1.17.99.9	179.014	218.091	251.314	140.704	86.3488	134.223	168.282	0.55668	-0.845079	0.267372	-3.16069	0.00157398	0.0434314	none
2680469	MGG_09474	NA	NA	uncharacterized protein	NA	NA	NA	NA	NA	11.0262	7.78896	4.83297	20.3918	23.9858	29.5746	16.2667	3.17513	1.66682	0.528163	3.15587	0.00160019	0.0439619	up
2684932	MGG_06759	NA	NA	heat shock protein 90	NA	NA	04141(Protein processing in endoplasmic reticulum)	K04079	NA	825.67	652.974	831.874	1572.21	1015.4	1180.71	1013.14	1.62922	0.704183	0.223473	3.15109	0.00162662	0.0444062	none
2674862	MGG_01114	MGG_01114T0	NADP-dependent mannitol dehydrogenase [Source:UniProtKB/TrEMBL;Acc:G4NC87]	NADP-dependent mannitol dehydrogenase	protein_coding	GO:0046872(metal ion binding); GO:0008270(zinc ion binding); GO:0000166(nucleotide binding); GO:0016491(oxidoreductase activity); GO:0055114(oxidation-reduction process)	00040(Pentose and glucuronate interconversions)	K17818	ec:1.1.1.287	50.5909	42.1902	33.8308	12.2351	12.7924	21.6122	28.8753	0.380618	-1.39359	0.44214	-3.15191	0.00162208	0.0444062	down
2678335	MGG_08045	MGG_08045T0	Putative uncharacterized protein [Source:UniProtKB/TrEMBL;Acc:G4MXQ3]	uncharacterized protein	protein_coding	GO:0003674(molecular_function); GO:0008150(biological_process); GO:0005575(cellular_component)	NA	NA	NA	37.6189	96.7129	72.4945	106.037	225.466	146.735	114.178	2.31682	1.21214	0.384962	3.14873	0.0016398	0.0444853	up
12984126	MGG_17450	NA	NA	mitochondrial 2-oxoglutarate/malate carrier protein	NA	NA	NA	K15104	NA	152.421	206.407	122.032	218.193	426.947	286.646	235.441	1.94124	0.956979	0.30386	3.14941	0.00163602	0.0444853	none
2684103	MGG_13286	NA	NA	uncharacterized protein	NA	NA	NA	NA	NA	243.874	69.4515	6.64533	2.03918	9.59431	4.54994	56.0257	0.0509642	-4.29437	1.36436	-3.14755	0.00164647	0.0445266	down
2680682	MGG_09728	NA	NA	lactose permease; lactose permease, variant	NA	NA	NA	NA	NA	186.149	255.088	230.774	63.2147	107.137	159.248	166.935	0.497734	-1.00655	0.320163	-3.14387	0.00166727	0.0448092	down
2674916	MGG_01146	MGG_01146T0	Acetylxylan esterase [Source:UniProtKB/TrEMBL;Acc:G4NBZ1]	acetylxylan esterase	protein_coding	GO:0008152(metabolic process); GO:0016787(hydrolase activity); GO:0005575(cellular_component)	NA	K05972	ec:3.1.1.72	9.08042	18.1742	15.7071	4.07836	0	0	7.84003	0.0738487	-3.75928	1.19544	-3.1447	0.00166259	0.0448092	down
2680017	MGG_09098	MGG_09098T0	Endo-1,4-beta-xylanase [Source:UniProtKB/TrEMBL;Acc:G4MZV3]	endo-1,4-beta-xylanase	protein_coding	GO:0005975(carbohydrate metabolic process); GO:0045493(xylan catabolic process); GO:0004553(hydrolase activity, hydrolyzing O-glycosyl compounds); GO:0005575(cellular_component); GO:0016787(hydrolase activity); GO:0008152(metabolic process); GO:0016798(hydrolase activity, acting on glycosyl bonds)	NA	NA	NA	498.775	267.421	405.969	236.545	230.264	183.135	303.685	0.552749	-0.855303	0.272431	-3.13952	0.00169225	0.0453397	none
2682451	MGG_02898	MGG_02898T0	Aspergillopepsin-F [Source:UniProtKB/TrEMBL;Acc:G5EH06]	aspergillopepsin-F	protein_coding	GO:0006508(proteolysis); GO:0016787(hydrolase activity); GO:0008233(peptidase activity); GO:0004190(aspartic-type endopeptidase activity); GO:0005575(cellular_component)	NA	NA	NA	34.3759	45.4356	93.0346	146.821	89.5469	178.585	97.9665	2.40293	1.2648	0.403548	3.13419	0.00172327	0.0458866	up
2681304	MGG_02234	MGG_02234T0	Putative uncharacterized protein [Source:UniProtKB/TrEMBL;Acc:G4MPP1]	uncharacterized protein	protein_coding	GO:0052051(obsolete interaction with host via protein secreted by type II secretion system); GO:0003674(molecular_function); GO:0005575(cellular_component)	NA	NA	NA	579.201	910.01	845.769	1303.04	1048.98	1718.74	1067.62	1.74459	0.802891	0.256127	3.13473	0.0017201	0.0458866	none
2682216	MGG_10613	MGG_10613T0	Retinol dehydrogenase 11 [Source:UniProtKB/TrEMBL;Acc:G4MQ11]	retinol dehydrogenase 11	protein_coding	GO:0000166(nucleotide binding); GO:0008152(metabolic process); GO:0016491(oxidoreductase activity); GO:0055114(oxidation-reduction process)	NA	NA	NA	91.4528	67.5043	68.2656	97.8808	147.113	185.41	109.604	1.91295	0.935795	0.299215	3.1275	0.001763	0.0468007	none
2676278	MGG_10764	MGG_10764T0	Putative uncharacterized protein [Source:UniProtKB/TrEMBL;Acc:G4NBL4]	uncharacterized protein	protein_coding	GO:0046872(metal ion binding); GO:0008270(zinc ion binding); GO:0005622(intracellular); GO:0003676(nucleic acid binding)	NA	NA	NA	14.9178	36.9975	19.936	36.7053	113.533	53.4618	45.9252	2.84446	1.50815	0.484152	3.11504	0.0018392	0.0485541	up
12984304	MGG_16070	MGG_16070T0	Putative uncharacterized protein [Source:UniProtKB/TrEMBL;Acc:G4MPN4]	uncharacterized protein	protein_coding	NA	NA	NA	NA	94.0472	74.6442	155.863	348.7	174.297	183.135	171.781	2.16382	1.11358	0.357506	3.11487	0.00184028	0.0485541	up
12985272	MGG_16251	MGG_16251T0	Putative uncharacterized protein [Source:UniProtKB/TrEMBL;Acc:G4MPU3]	uncharacterized protein	protein_coding	GO:0043581(obsolete mycelium development); GO:0003674(molecular_function); GO:0005575(cellular_component)	NA	NA	NA	103.128	82.4331	82.7645	146.821	211.075	127.398	125.603	1.80469	0.851747	0.273777	3.1111	0.0018639	0.0490278	none
2680505	MGG_09462	NA	NA	inositol oxygenase 1	NA	NA	00053(Ascorbate and aldarate metabolism); 00562(Inositol phosphate metabolism); 01250(Biosynthesis of nucleotide sugars)	K00469	ec:1.13.99.1	430.671	338.82	408.99	287.525	167.9	241.147	312.509	0.58954	-0.762339	0.245372	-3.10687	0.00189077	0.0495839	none
5050038	MGG_13615	MGG_13615T0	Putative uncharacterized protein [Source:UniProtKB/TrEMBL;Acc:G4N9E2]	uncharacterized protein	protein_coding	GO:0016021(integral component of membrane); GO:0006810(transport); GO:0055085(transmembrane transport); GO:0016020(membrane); GO:0005215(transporter activity); GO:0015267(channel activity)	NA	K03441	NA	340.516	478.372	344.953	595.441	722.772	556.23	506.381	1.61001	0.687073	0.221728	3.09872	0.00194359	0.0508151	none
2679565	MGG_01890	MGG_01890T0	Putative uncharacterized protein [Source:UniProtKB/TrEMBL;Acc:G4MWP9]	uncharacterized protein	protein_coding	GO:0016020(membrane); GO:0016021(integral component of membrane)	NA	NA	NA	7.13462	3.2454	4.83297	20.3918	20.7877	14.7873	11.8633	3.64159	1.86457	0.602654	3.09393	0.00197524	0.0513326	none
2679965	MGG_08980	NA	NA	stress-induced-phosphoprotein 1	NA	NA	NA	K09553	NA	151.773	146.043	157.071	265.094	212.674	230.909	193.927	1.55345	0.635475	0.205389	3.09401	0.00197473	0.0513326	none
2674597	MGG_00276	MGG_00276T0	FAD binding domain-containing protein [Source:UniProtKB/TrEMBL;Acc:G4ND99]	FAD binding domain-containing protein	protein_coding	GO:0050660(flavin adenine dinucleotide binding); GO:0003824(catalytic activity); GO:0016491(oxidoreductase activity); GO:0055114(oxidation-reduction process); GO:0016614(oxidoreductase activity, acting on CH-OH group of donors); GO:0008762(UDP-N-acetylmuramate dehydrogenase activity); GO:0003674(molecular_function); GO:0005575(cellular_component); GO:0071949(FAD binding)	NA	NA	NA	51.8881	107.747	66.4533	81.5673	246.254	208.16	127.012	2.38273	1.25261	0.40535	3.09021	0.00200018	0.0518251	none
5051256	MGG_11286	NA	NA	oxidoreductase	NA	NA	00330(Arginine and proline metabolism)	K00472	ec:1.14.11.2	36.9703	29.8577	36.8514	10.1959	15.9905	12.5123	23.7297	0.375993	-1.41122	0.457165	-3.0869	0.00202258	0.0522489	none
2675524	MGG_04864	MGG_04864T0	Allantoin permease [Source:UniProtKB/TrEMBL;Acc:G4N2N2]	allantoin permease	protein_coding	GO:0016020(membrane); GO:0015205(nucleobase transmembrane transporter activity); GO:0016021(integral component of membrane); GO:0055085(transmembrane transport); GO:0022857(transmembrane transporter activity)	NA	K03457	NA	13.6206	15.5779	3.0206	26.5094	51.1697	30.7121	23.435	3.38341	1.75848	0.570639	3.0816	0.00205894	0.0522525	none
2679726	MGG_01353	MGG_01353T0	Cytochrome P450 monooxygenase [Source:UniProtKB/TrEMBL;Acc:G4MZ08]	cytochrome P450 monooxygenase	protein_coding	GO:0046872(metal ion binding); GO:0009055(electron transfer activity); GO:0020037(heme binding); GO:0005506(iron ion binding); GO:0016491(oxidoreductase activity); GO:0055114(oxidation-reduction process); GO:0004497(monooxygenase activity); GO:0016705(oxidoreductase activity, acting on paired donors, with incorporation or reduction of molecular oxygen); GO:0016020(membrane); GO:0016021(integral c…	NA	NA	NA	34.3759	23.3669	42.8926	48.9404	51.1697	200.197	66.8238	3.01779	1.59349	0.516582	3.08469	0.00203765	0.0522525	none
2677439	MGG_04213	MGG_04213T0	Putative uncharacterized protein [Source:UniProtKB/TrEMBL;Acc:G4NF45]	uncharacterized protein	protein_coding	GO:0046872(metal ion binding); GO:0008270(zinc ion binding); GO:0003677(DNA binding); GO:0005634(nucleus); GO:0006355(regulation of transcription, DNA-templated); GO:0006351(transcription, DNA-templated); GO:0003700(DNA-binding transcription factor activity); GO:0000981(DNA-binding transcription factor activity, RNA polymerase II-specific); GO:0006357(regulation of transcription by RNA polymerase…	NA	NA	NA	44.7535	62.9607	66.4533	75.4497	193.485	108.061	91.8606	2.16983	1.11758	0.362503	3.08296	0.00204953	0.0522525	none
2678185	MGG_04687	MGG_04687T0	Putative uncharacterized protein [Source:UniProtKB/TrEMBL;Acc:G4MRA8]	uncharacterized protein	protein_coding	GO:0003674(molecular_function); GO:0008150(biological_process); GO:0005575(cellular_component)	NA	NA	NA	145.287	131.114	120.824	212.075	287.829	178.585	179.286	1.70434	0.769213	0.249598	3.08181	0.00205745	0.0522525	none
5049553	MGG_11764	NA	NA	uncharacterized protein; hypothetical protein, variant	NA	NA	NA	NA	NA	441.049	514.071	455.507	573.01	1058.57	760.977	633.865	1.69774	0.763617	0.247589	3.08422	0.00204088	0.0522525	none
2683934	MGG_06041	MGG_06041T0	Rhamnogalacturonan lyase [Source:UniProtKB/TrEMBL;Acc:G4N4X1]	rhamnogalacturonan lyase	protein_coding	GO:0005975(carbohydrate metabolic process); GO:0003824(catalytic activity); GO:0030246(carbohydrate binding); GO:0016829(lyase activity); GO:0005576(extracellular region); GO:0000272(polysaccharide catabolic process); GO:0071555(cell wall organization); GO:0102210(rhamnogalacturonan endolyase activity)	NA	K18195	ec:4.2.2.23	35.6731	40.892	31.4143	6.11755	15.9905	15.9248	24.3354	0.366278	-1.44899	0.469595	-3.08561	0.00203132	0.0522525	none
2679353	MGG_01713	MGG_01713T0	Norsolorinic acid reductase [Source:UniProtKB/TrEMBL;Acc:G4MUX2]	norsolorinic acid reductase	protein_coding	GO:0016491(oxidoreductase activity); GO:0055114(oxidation-reduction process); GO:0008150(biological_process); GO:0005575(cellular_component)	NA	NA	NA	138.801	184.339	130.49	185.566	409.357	272.996	220.258	1.9178	0.939455	0.305511	3.07503	0.00210483	0.0526421	none
2683087	MGG_07368	NA	NA	uncharacterized protein	NA	NA	NA	NA	NA	48.6451	52.5755	48.9338	110.116	65.5611	108.061	72.3154	1.89019	0.918533	0.298425	3.07793	0.00208441	0.0526421	none
2678765	MGG_08498	NA	NA	uncharacterized protein	NA	NA	NA	NA	NA	1991.21	1540.92	1575.55	2090.16	4573.29	2747.02	2419.69	1.84274	0.881849	0.286735	3.07548	0.00210164	0.0526421	none
2679580	MGG_01299	MGG_01299T0	Putative uncharacterized protein [Source:UniProtKB/TrEMBL;Acc:G4MY84]	uncharacterized protein	protein_coding	GO:0003674(molecular_function); GO:0005575(cellular_component); GO:0016020(membrane); GO:0016021(integral component of membrane)	NA	NA	NA	139.449	125.272	129.282	85.6457	70.3583	78.4864	104.749	0.59342	-0.752874	0.244944	-3.07365	0.00211455	0.0526421	none
2682752	MGG_02582	MGG_02582T0	Putative uncharacterized protein [Source:UniProtKB/TrEMBL;Acc:G4NJU5]	uncharacterized protein	protein_coding	GO:0016020(membrane); GO:0016021(integral component of membrane)	NA	NA	NA	132.963	131.763	118.408	65.2538	79.9526	78.4864	101.138	0.587694	-0.766862	0.24935	-3.07544	0.00210193	0.0526421	none
2679138	MGG_01396	MGG_01396T0	Periplasmic beta-glucosidase [Source:UniProtKB/TrEMBL;Acc:G4MZH4]	periplasmic beta-glucosidase	protein_coding	GO:0005975(carbohydrate metabolic process); GO:0008152(metabolic process); GO:0016787(hydrolase activity); GO:0004553(hydrolase activity, hydrolyzing O-glycosyl compounds); GO:0016798(hydrolase activity, acting on glycosyl bonds); GO:0005575(cellular_component); GO:0000272(polysaccharide catabolic process)	00460(Cyanoamino acid metabolism); 00500(Starch and sucrose metabolism)	K05349	ec:3.2.1.21	55.7797	52.5755	42.8926	18.3526	30.382	17.0623	36.1741	0.432637	-1.20877	0.393311	-3.07333	0.00211688	0.0526421	none
2675051	MGG_00083	MGG_00083T0	Putative uncharacterized protein [Source:UniProtKB/TrEMBL;Acc:G4NEJ4]	uncharacterized protein	protein_coding	GO:0003674(molecular_function); GO:0008150(biological_process); GO:0005575(cellular_component)	NA	NA	NA	26.5927	15.5779	21.7483	0	6.39621	6.82491	12.8567	0.225617	-2.14805	0.69813	-3.07687	0.00209187	0.0526421	none
2685154	MGG_06981	NA	NA	carnitine O-acetyltransferase, variant 2; carnitine O-acetyltransferase, variant 1; carnitine O-acetyltransferase	NA	NA	04146(Peroxisome)	K00624	ec:2.3.1.7	33.7273	36.9975	24.1648	55.0579	86.3488	56.8742	48.8618	2.09219	1.06501	0.34693	3.06981	0.00214192	0.0529604	none
5049911	MGG_12154	MGG_12154T0	Fatty acid synthase subunit alpha [Source:UniProtKB/TrEMBL;Acc:G4NIU0]	fatty acid synthase subunit alpha	protein_coding	GO:0005739(mitochondrion); GO:0000166(nucleotide binding); GO:0008152(metabolic process); GO:0016740(transferase activity); GO:0000287(magnesium ion binding); GO:0003824(catalytic activity); GO:0004316(3-oxoacyl-[acyl-carrier-protein] reductase (NADPH) activity); GO:0055114(oxidation-reduction process); GO:0006633(fatty acid biosynthetic process); GO:0005835(fatty acid synthase complex); GO:00088…	00061(Fatty acid biosynthesis); 01212(Fatty acid metabolism)	K00667	ec:2.3.1.86	473.479	725.671	740.048	350.739	295.825	465.231	508.499	0.574752	-0.798989	0.26025	-3.07008	0.00213999	0.0529604	none
5051237	MGG_14633	NA	NA	KpsF/GutQ family protein	NA	NA	NA	NA	NA	75.2378	109.045	97.2634	24.4702	59.1649	48.9118	69.0156	0.478743	-1.06268	0.346537	-3.06656	0.00216534	0.0533871	none
2680019	MGG_09100	MGG_09100T0	Cutinase [Source:UniProtKB/TrEMBL;Acc:G4MZV6]	cutinase	protein_coding	GO:0008152(metabolic process); GO:0016787(hydrolase activity); GO:0050525(cutinase activity); GO:0005576(extracellular region); GO:0003674(molecular_function); GO:0008150(biological_process); GO:0005575(cellular_component); GO:0052689(carboxylic ester hydrolase activity)	NA	K08095	ec:3.1.1.74	79.1294	145.394	115.991	57.0971	63.9621	52.3243	85.6497	0.507664	-0.978053	0.319038	-3.06563	0.0021721	0.0534015	none
2680216	MGG_09226	NA	NA	fumarate reductase	NA	NA	NA	K18561	NA	3.89161	7.78896	4.83297	10.1959	59.1649	10.2374	16.0186	4.81781	2.26838	0.74117	3.06054	0.0022094	0.0540116	none
2684335	MGG_06155	MGG_06155T0	Putative uncharacterized protein [Source:UniProtKB/TrEMBL;Acc:G4MZY9]	uncharacterized protein	protein_coding	NA	NA	NA	NA	191.986	265.474	163.113	216.153	588.451	491.393	319.428	2.09392	1.06621	0.34829	3.06126	0.00220406	0.0540116	none
2678952	MGG_14118	NA	NA	uncharacterized protein	NA	NA	00500(Starch and sucrose metabolism)	K22337	NA	322.355	299.226	181.236	279.368	946.639	588.079	436.151	2.26261	1.17799	0.385552	3.05533	0.00224812	0.0548036	none
2683202	MGG_07306	NA	NA	mixed-linked glucanase	NA	NA	NA	NA	NA	446.238	521.211	383.617	554.658	770.743	890.65	594.519	1.64417	0.717361	0.235484	3.04632	0.00231659	0.0563139	none
2680951	MGG_09965	MGG_09965T0	Putative uncharacterized protein [Source:UniProtKB/TrEMBL;Acc:G4N9N8]	uncharacterized protein	protein_coding	NA	NA	NA	NA	138.152	112.291	137.135	79.5281	68.7593	78.4864	102.392	0.584956	-0.7736	0.254195	-3.04333	0.00233972	0.0567169	none
2678501	MGG_08307	NA	NA	uncharacterized protein	NA	NA	NA	NA	NA	208.201	195.373	129.282	207.997	479.716	357.17	262.956	1.96619	0.975403	0.320728	3.04121	0.00235629	0.056959	none
2674580	MGG_00198	MGG_00198T0	Flavohemoglobin [Source:UniProtKB/TrEMBL;Acc:G4NDV3]	flavohemoglobin	protein_coding	GO:0020037(heme binding); GO:0005506(iron ion binding); GO:0006810(transport); GO:0016491(oxidoreductase activity); GO:0055114(oxidation-reduction process); GO:0019825(oxygen binding); GO:0015671(oxygen transport); GO:0005575(cellular_component); GO:0004128(cytochrome-b5 reductase activity, acting on NAD(P)H); GO:0071949(FAD binding); GO:0008941(nitric oxide dioxygenase activity); GO:0051409(resp…	NA	K05916	ec:1.14.12.17	51.2395	81.784	103.909	136.625	1188.1	275.271	306.154	6.75302	2.75553	0.906642	3.03927	0.00237151	0.0571673	none
2683466	MGG_07546	MGG_07546T0	Alpha-glucosides permease MPH2/3 [Source:UniProtKB/TrEMBL;Acc:G4N237]	alpha-glucosides permease MPH2/3	protein_coding	GO:0016021(integral component of membrane); GO:0006810(transport); GO:0055085(transmembrane transport); GO:0016020(membrane); GO:0005215(transporter activity); GO:0022891(GO_0022891); GO:0022857(transmembrane transporter activity)	NA	K08141	NA	10.3776	24.016	6.64533	24.4702	65.5611	38.6745	28.2908	3.15947	1.65968	0.547756	3.02997	0.00244579	0.0584505	none
2680351	MGG_09323	NA	NA	phenylacetone monooxygenase	NA	NA	NA	NA	NA	902.853	660.114	645.805	648.46	2790.35	1708.5	1226.01	2.33149	1.22125	0.403144	3.02932	0.00245105	0.0584505	none
2682423	MGG_12580	MGG_12580T0	Putative uncharacterized protein [Source:UniProtKB/TrEMBL;Acc:G4NLS1]	uncharacterized protein	protein_coding	GO:0005515(protein binding)	NA	NA	NA	168.636	169.41	140.76	216.153	300.622	246.834	207.069	1.59806	0.67632	0.223264	3.02923	0.00245176	0.0584505	none
2679279	MGG_01178	MGG_01178T0	Beta-mannosidase [Source:UniProtKB/TrEMBL;Acc:G4MWK7]	beta-mannosidase	protein_coding	GO:0005975(carbohydrate metabolic process); GO:0003824(catalytic activity); GO:0004553(hydrolase activity, hydrolyzing O-glycosyl compounds); GO:0043169(cation binding); GO:0004567(beta-mannosidase activity); GO:0046355(mannan catabolic process); GO:0016787(hydrolase activity); GO:0008152(metabolic process); GO:0016798(hydrolase activity, acting on glycosyl bonds)	00511(Other glycan degradation)	K01192	ec:3.2.1.25	139.449	91.5202	101.492	73.4106	55.9668	46.6369	84.746	0.521762	-0.938537	0.309697	-3.0305	0.00244148	0.0584505	none
2681426	MGG_02329	MGG_02329T0	Isotrichodermin C-15 hydroxylase [Source:UniProtKB/TrEMBL;Acc:G4MQJ3]	isotrichodermin C-15 hydroxylase	protein_coding	GO:0046872(metal ion binding); GO:0009055(electron transfer activity); GO:0020037(heme binding); GO:0005506(iron ion binding); GO:0016491(oxidoreductase activity); GO:0055114(oxidation-reduction process); GO:0004497(monooxygenase activity); GO:0016705(oxidoreductase activity, acting on paired donors, with incorporation or reduction of molecular oxygen); GO:0003674(molecular_function); GO:0008150(…	NA	NA	NA	149.178	170.059	126.261	299.76	1533.49	343.52	437.045	4.88641	2.28877	0.7569	3.02388	0.00249557	0.059275	none
5051221	MGG_11255	NA	NA	uncharacterized protein	NA	NA	NA	NA	NA	11.0262	14.2798	32.0184	103.998	28.7829	46.6369	39.4571	3.08623	1.62584	0.537765	3.02334	0.00250004	0.059275	none
2679581	MGG_01300	MGG_01300T0	L-galactonate dehydratase [Source:UniProtKB/TrEMBL;Acc:G4MY85]	L-galactonate dehydratase	protein_coding	GO:0008152(metabolic process); GO:0003824(catalytic activity); GO:0009063(cellular amino acid catabolic process); GO:0005575(cellular_component); GO:0016052(carbohydrate catabolic process); GO:0050023(L-fuconate dehydratase activity)	00040(Pentose and glucuronate interconversions)	K18102	ec:4.2.1.146	300.303	196.022	244.669	175.37	92.745	139.911	191.503	0.548392	-0.866721	0.287249	-3.01731	0.00255026	0.0603004	none
2684512	MGG_06357	MGG_06357T0	Putative uncharacterized protein [Source:UniProtKB/TrEMBL;Acc:G4N7V0]	uncharacterized protein	protein_coding	GO:0003674(molecular_function); GO:0008150(biological_process); GO:0005575(cellular_component)	NA	NA	NA	86.9126	73.346	76.1192	130.508	156.707	113.748	106.224	1.69081	0.757716	0.251495	3.01285	0.00258808	0.061028	none
5049164	MGG_13309	NA	NA	uncharacterized protein	NA	NA	NA	NA	NA	14.9178	28.5595	18.7277	28.5486	76.7545	50.0493	36.2596	2.51777	1.33215	0.443057	3.00671	0.0026409	0.0617815	none
5051118	MGG_11142	MGG_11142T0	Putative uncharacterized protein [Source:UniProtKB/TrEMBL;Acc:G4MVQ5]	uncharacterized protein	protein_coding	GO:0005515(protein binding)	NA	NA	NA	15.5664	20.1215	16.3113	48.9404	47.9716	27.2996	29.3685	2.3508	1.23315	0.410253	3.00583	0.00264859	0.0617815	none
12984885	MGG_15018	MGG_15018T0	1-phosphatidylinositol-4,5-bisphosphate phosphodiesterase 1 [Source:UniProtKB/TrEMBL;Acc:G4NJD0]	1-phosphatidylinositol-4,5-bisphosphate phosphodiesterase 1	protein_coding	GO:0016042(lipid catabolic process); GO:0006629(lipid metabolic process); GO:0005622(intracellular); GO:0007165(signal transduction); GO:0008081(phosphoric diester hydrolase activity); GO:0035556(intracellular signal transduction); GO:0004435(phosphatidylinositol phospholipase C activity); GO:0005575(cellular_component); GO:0016787(hydrolase activity)	NA	NA	NA	107.668	118.133	114.783	138.664	196.683	245.697	153.605	1.72043	0.782766	0.260372	3.00633	0.00264418	0.0617815	none
2678011	MGG_04779	MGG_04779T0	Putative uncharacterized protein [Source:UniProtKB/TrEMBL;Acc:G4MQT0]	uncharacterized protein	protein_coding	GO:0003674(molecular_function); GO:0008150(biological_process); GO:0005575(cellular_component)	NA	NA	NA	96.6416	83.7313	98.4717	142.743	142.316	164.935	121.473	1.61945	0.695507	0.231279	3.00722	0.00263646	0.0617815	none
12984720	MGG_15451	NA	NA	uncharacterized protein	NA	NA	NA	NA	NA	479.317	489.406	401.136	344.622	289.428	208.16	368.678	0.611084	-0.710557	0.23693	-2.99901	0.00270855	0.0630102	none
2684158	MGG_05817	MGG_05817T0	Nonsense-mediated mRNA decay protein 3 [Source:UniProtKB/TrEMBL;Acc:G4N0U7]	nonsense-mediated mRNA decay protein 3	protein_coding	GO:0043023(ribosomal large subunit binding); GO:0000055(ribosomal large subunit export from nucleus); GO:0022625(cytosolic large ribosomal subunit); GO:0008150(biological_process); GO:0005575(cellular_component); GO:0005634(nucleus); GO:0005737(cytoplasm); GO:0015031(protein transport); GO:0070180(large ribosomal subunit rRNA binding); GO:0005829(cytosol)	03008(Ribosome biogenesis in eukaryotes); 03013(Nucleocytoplasmic transport)	K07562	NA	138.801	150.587	167.946	118.273	63.9621	76.2114	119.296	0.557823	-0.842122	0.280941	-2.9975	0.00272202	0.0631538	none
2675534	MGG_05261	MGG_05261T0	Putative uncharacterized protein [Source:UniProtKB/TrEMBL;Acc:G4N5F4]	uncharacterized protein	protein_coding	NA	NA	NA	NA	84.9668	79.1877	75.5151	134.586	183.891	106.924	110.845	1.7679	0.822033	0.274612	2.99343	0.00275862	0.0638318	none
2684453	MGG_06298	MGG_06298T0	Putative uncharacterized protein [Source:UniProtKB/TrEMBL;Acc:G4N869]	uncharacterized protein	protein_coding	NA	NA	NA	NA	295.114	376.466	485.109	426.189	1136.93	755.29	579.182	2.00606	1.00437	0.336156	2.9878	0.0028099	0.064845	none
2684185	MGG_05790	MGG_05790T0	Laccase-1 [Source:UniProtKB/TrEMBL;Acc:G4N0V4]	laccase-1	protein_coding	GO:0016491(oxidoreductase activity); GO:0055114(oxidation-reduction process); GO:0005507(copper ion binding); GO:0008150(biological_process); GO:0005575(cellular_component); GO:0046872(metal ion binding)	NA	NA	NA	7.13462	14.9288	11.4783	87.6848	19.1886	18.1997	26.4358	3.64674	1.86661	0.627007	2.97701	0.00291076	0.066994	none
2681391	MGG_02294	MGG_02294T0	Ent-kaurene oxidase [Source:UniProtKB/TrEMBL;Acc:G4MQ54]	ent-kaurene oxidase	protein_coding	GO:0046872(metal ion binding); GO:0009055(electron transfer activity); GO:0020037(heme binding); GO:0005506(iron ion binding); GO:0055114(oxidation-reduction process); GO:0004497(monooxygenase activity); GO:0016705(oxidoreductase activity, acting on paired donors, with incorporation or reduction of molecular oxygen); GO:0003674(molecular_function); GO:0008150(biological_process); GO:0005575(cellu…	NA	NA	NA	444.292	388.15	288.77	362.974	921.054	999.849	567.515	2.04103	1.0293	0.346356	2.97179	0.00296067	0.0679619	none
2678889	MGG_08695	MGG_08695T0	NAD-binding Rossmann fold oxidoreductase [Source:UniProtKB/TrEMBL;Acc:G4NFW1]	NAD-binding Rossmann fold oxidoreductase	protein_coding	GO:0000166(nucleotide binding); GO:0008152(metabolic process); GO:0016491(oxidoreductase activity); GO:0055114(oxidation-reduction process); GO:0005575(cellular_component)	NA	NA	NA	68.7518	49.9791	52.5585	30.5877	20.7877	29.5746	42.0399	0.47272	-1.08094	0.36386	-2.97076	0.00297064	0.0680103	none
2679488	MGG_01256	MGG_01256T0	Phosphoribosylaminoimidazole carboxylase [Source:UniProtKB/TrEMBL;Acc:G4MXN0]	phosphoribosylaminoimidazole carboxylase	protein_coding	GO:0046872(metal ion binding); GO:0005737(cytoplasm); GO:0005524(ATP binding); GO:0003824(catalytic activity); GO:0016874(ligase activity); GO:0006189('de novo' IMP biosynthetic process); GO:0006144(purine nucleobase metabolic process); GO:0004638(phosphoribosylaminoimidazole carboxylase activity); GO:0000166(nucleotide binding); GO:0006164(purine nucleotide biosynthetic process); GO:0016829(lyas…	00230(Purine metabolism)	K11808	ec:4.1.1.21	70.049	53.8736	67.0574	36.7053	31.981	28.4371	48.0172	0.502433	-0.992997	0.335146	-2.96288	0.00304778	0.0695922	none
2680312	MGG_11999	MGG_11999T0	Mannan endo-1,4-beta-mannosidase C [Source:UniProtKB/TrEMBL;Acc:G4NI55]	mannan endo-1,4-beta-mannosidase C	protein_coding	GO:0005975(carbohydrate metabolic process); GO:0003824(catalytic activity); GO:0004553(hydrolase activity, hydrolyzing O-glycosyl compounds); GO:0043169(cation binding); GO:0005575(cellular_component); GO:0016787(hydrolase activity); GO:0008152(metabolic process); GO:0016798(hydrolase activity, acting on glycosyl bonds)	00051(Fructose and mannose metabolism)	K19355	ec:3.2.1.78	177.068	132.412	182.444	71.3714	116.731	90.9987	128.504	0.57002	-0.810914	0.274022	-2.95931	0.00308333	0.0700344	none
2674576	MGG_00272	MGG_00272T0	Putative uncharacterized protein [Source:UniProtKB/TrEMBL;Acc:G4NDA4]	uncharacterized protein	protein_coding	GO:0043581(obsolete mycelium development); GO:0003674(molecular_function); GO:0005575(cellular_component); GO:0043386(mycotoxin biosynthetic process)	NA	NA	NA	115.451	126.571	139.552	91.7632	46.3725	72.799	98.7514	0.548789	-0.865675	0.29245	-2.96009	0.00307554	0.0700344	none
2675791	MGG_05515	MGG_05515T0	Putative uncharacterized protein [Source:UniProtKB/TrEMBL;Acc:G4MM87]	uncharacterized protein	protein_coding	GO:0008237(metallopeptidase activity); GO:0006508(proteolysis)	NA	NA	NA	3.89161	4.54356	15.103	34.6661	19.1886	28.4371	17.6383	3.45878	1.79027	0.605322	2.95754	0.00310101	0.0702516	none
2681885	MGG_10265	MGG_10265T0	hypothetical protein [Source:BROAD_Magnaporthe_DB;Acc:MGG_10265]	uncharacterized protein	protein_coding	GO:0005634(nucleus); GO:0006334(nucleosome assembly)	NA	NA	NA	468.939	440.725	559.416	395.601	179.094	242.284	381.01	0.553379	-0.85366	0.288924	-2.95462	0.00313051	0.0707349	none
2681729	MGG_10118	NA	NA	ATPase family AAA domain-containing protein 1	NA	NA	NA	NA	NA	186.797	179.146	172.174	214.114	406.159	293.471	241.977	1.70225	0.767445	0.259955	2.95222	0.00315496	0.0711016	none
12986344	MGG_15154	NA	NA	uncharacterized protein	NA	NA	NA	NA	NA	433.266	761.371	267.021	577.089	1845.31	1049.9	822.325	2.37678	1.24901	0.42341	2.94988	0.00317899	0.0711306	none
2683150	MGG_12357	NA	NA	dicer-like protein 2	NA	NA	NA	NA	NA	27.8899	36.3485	32.6225	44.862	92.745	61.4242	49.3153	2.06528	1.04634	0.354656	2.95028	0.00317484	0.0711306	none
2675161	MGG_00587	MGG_00587T0	Putative uncharacterized protein [Source:UniProtKB/TrEMBL;Acc:G4NBA9]	uncharacterized protein	protein_coding	GO:0003677(DNA binding); GO:0005634(nucleus); GO:0006355(regulation of transcription, DNA-templated); GO:0043565(sequence-specific DNA binding); GO:0003700(DNA-binding transcription factor activity)	NA	NA	NA	230.254	236.265	222.921	293.642	362.985	363.995	285.01	1.4852	0.570654	0.193462	2.94969	0.0031809	0.0711306	none
2677216	MGG_03825	MGG_03825T0	Isotrichodermin C-15 hydroxylase [Source:UniProtKB/TrEMBL;Acc:G4NHJ0]	isotrichodermin C-15 hydroxylase	protein_coding	GO:0046872(metal ion binding); GO:0009055(electron transfer activity); GO:0020037(heme binding); GO:0005506(iron ion binding); GO:0016491(oxidoreductase activity); GO:0055114(oxidation-reduction process); GO:0004497(monooxygenase activity); GO:0016705(oxidoreductase activity, acting on paired donors, with incorporation or reduction of molecular oxygen); GO:0003674(molecular_function); GO:0008150(…	NA	NA	NA	70.049	69.4515	21.7483	126.429	641.22	164.935	182.306	5.7858	2.53252	0.859189	2.94757	0.00320285	0.0714368	none
2683550	MGG_07630	MGG_07630T0	Putative uncharacterized protein [Source:UniProtKB/TrEMBL;Acc:G4N2Y9]	uncharacterized protein	protein_coding	GO:0003674(molecular_function); GO:0008150(biological_process); GO:0005575(cellular_component)	NA	NA	NA	1522.92	1322.82	1468.62	1199.04	630.027	729.127	1145.43	0.591772	-0.756888	0.257037	-2.94466	0.0032331	0.0716463	none
2676075	MGG_05763	MGG_05763T0	Stress responsive A/B barrel domain-containing protein [Source:UniProtKB/TrEMBL;Acc:G4MPY9]	stress responsive A/B barrel domain-containing protein	protein_coding	GO:0003674(molecular_function); GO:0008150(biological_process); GO:0005575(cellular_component)	NA	NA	NA	18.1608	28.5595	23.5607	8.15673	7.99526	5.68742	15.3534	0.303862	-1.71851	0.583544	-2.94496	0.00322996	0.0716463	none
2684100	MGG_05875	MGG_05875T0	Pectate lyase [Source:UniProtKB/TrEMBL;Acc:G4N3X4]	pectate lyase	protein_coding	GO:0005576(extracellular region); GO:0016829(lyase activity); GO:0030570(pectate lyase activity); GO:0008150(biological_process)	00040(Pentose and glucuronate interconversions)	K22539	ec:4.2.2.2	14.9178	6.4908	23.5607	0	3.1981	2.27497	8.40707	0.130619	-2.93657	0.997381	-2.94428	0.00323708	0.0716463	none
2681783	MGG_10156	MGG_10156T0	Putative uncharacterized protein [Source:UniProtKB/TrEMBL;Acc:G4MUA7]	uncharacterized protein	protein_coding	GO:0016020(membrane); GO:0016021(integral component of membrane)	NA	NA	NA	92.1014	92.8184	70.6821	110.116	177.495	153.56	116.129	1.73603	0.795793	0.270501	2.94192	0.00326181	0.0720094	none
2677217	MGG_03826	MGG_03826T0	Putative uncharacterized protein [Source:UniProtKB/TrEMBL;Acc:G4NHI9]	uncharacterized protein	protein_coding	GO:0005515(protein binding)	NA	NA	NA	4.54021	8.43804	8.45769	16.3135	38.3773	15.9248	15.3419	3.28194	1.71455	0.583256	2.93962	0.00328618	0.0723629	none
2674623	MGG_01138	MGG_01138T0	Cytochrome P450 2C31 [Source:UniProtKB/TrEMBL;Acc:G4NC52]	cytochrome P450 2C31	protein_coding	GO:0046872(metal ion binding); GO:0009055(electron transfer activity); GO:0020037(heme binding); GO:0005506(iron ion binding); GO:0016491(oxidoreductase activity); GO:0055114(oxidation-reduction process); GO:0004497(monooxygenase activity); GO:0016705(oxidoreductase activity, acting on paired donors, with incorporation or reduction of molecular oxygen)	NA	NA	NA	17.5122	24.016	18.7277	36.7053	55.9668	38.6745	31.9338	2.18173	1.12547	0.384071	2.93038	0.00338544	0.0741712	none
2682199	MGG_10586	MGG_10586T0	Putative uncharacterized protein [Source:UniProtKB/TrEMBL;Acc:G5EH68]	uncharacterized protein	protein_coding	GO:0003674(molecular_function); GO:0008150(biological_process); GO:0005575(cellular_component)	NA	NA	NA	220.525	248.598	198.152	267.133	409.357	390.157	288.987	1.60453	0.682152	0.232775	2.93052	0.0033839	0.0741712	none
5049087	MGG_13220	NA	NA	hypothetical protein, variant; uncharacterized protein	NA	NA	NA	NA	NA	33.0787	31.1558	25.3731	46.9012	68.7593	59.1492	44.0695	1.96421	0.973948	0.332851	2.92608	0.00343265	0.0750155	none
2674790	MGG_01111	MGG_01111T0	Cytochrome c oxidase subunit 6B [Source:UniProtKB/TrEMBL;Acc:G4NC90]	cytochrome c oxidase subunit 6B	protein_coding	GO:0005739(mitochondrion); GO:0033617(mitochondrial cytochrome c oxidase assembly); GO:0004129(cytochrome-c oxidase activity); GO:0005751(mitochondrial respiratory chain complex IV)	00190(Oxidative phosphorylation)	K02267	NA	281.493	319.347	338.308	216.153	207.877	208.16	261.89	0.672472	-0.572455	0.196139	-2.91863	0.00351579	0.0766388	none
2684732	MGG_06577	MGG_06577T0	Phenylacetone monooxygenase [Source:UniProtKB/TrEMBL;Acc:G4N6B7]	phenylacetone monooxygenase	protein_coding	GO:0004497(monooxygenase activity); GO:0003674(molecular_function); GO:0008150(biological_process); GO:0005575(cellular_component); GO:0055114(oxidation-reduction process)	NA	NA	NA	16.215	14.9288	9.06181	26.5094	97.5422	15.9248	30.0303	3.47367	1.79646	0.616301	2.91491	0.00355796	0.0771694	none
2682048	MGG_10481	NA	NA	NACHT and WD domain-containing protein; NACHT and WD domain-containing protein, variant	NA	NA	NA	NA	NA	25.2955	23.3669	21.1442	6.11755	7.99526	7.96239	15.3136	0.320996	-1.63937	0.562404	-2.91494	0.00355757	0.0771694	none
12984855	MGG_15011	MGG_15011T0	Putative uncharacterized protein [Source:UniProtKB/TrEMBL;Acc:G5EGW0]	uncharacterized protein	protein_coding	GO:0000079(regulation of cyclin-dependent protein serine/threonine kinase activity); GO:0019901(protein kinase binding)	04138(Autophagy - yeast)	K21197	NA	365.163	332.329	361.264	409.876	647.616	591.492	451.29	1.56126	0.64271	0.220924	2.9092	0.0036236	0.0782011	none
2681265	MGG_02142	MGG_02142T0	Putative uncharacterized protein [Source:UniProtKB/TrEMBL;Acc:G4MP47]	uncharacterized protein	protein_coding	GO:0008061(chitin binding)	NA	NA	NA	52.5367	27.2613	23.5607	4.07836	11.1934	15.9248	22.4259	0.317878	-1.65345	0.568291	-2.90952	0.00361982	0.0782011	none
12986153	MGG_14913	MGG_14913T0	Putative uncharacterized protein [Source:UniProtKB/TrEMBL;Acc:G4NIU7]	uncharacterized protein	protein_coding	NA	NA	NA	NA	25.9441	45.4356	32.6225	46.9012	132.721	62.5616	57.6977	2.33422	1.22294	0.421167	2.90369	0.00368795	0.0793918	none
2683036	MGG_07022	MGG_07022T0	Putative uncharacterized protein [Source:UniProtKB/TrEMBL;Acc:G4MZN3]	uncharacterized protein	protein_coding	GO:0008150(biological_process); GO:0005575(cellular_component); GO:0016020(membrane); GO:0016021(integral component of membrane); GO:0005515(protein binding)	NA	NA	NA	79.1294	40.892	35.6431	8.15673	25.5848	22.7497	35.3593	0.372986	-1.42281	0.490616	-2.90004	0.00373115	0.0801225	none
2678441	MGG_08074	MGG_08074T0	NADP-specific glutamate dehydrogenase [Source:UniProtKB/TrEMBL;Acc:G4MXT4]	NADP-specific glutamate dehydrogenase	protein_coding	GO:0005739(mitochondrion); GO:0005634(nucleus); GO:0000166(nucleotide binding); GO:0016491(oxidoreductase activity); GO:0055114(oxidation-reduction process); GO:0006537(glutamate biosynthetic process); GO:0006520(cellular amino acid metabolic process); GO:0019676(ammonia assimilation cycle); GO:0004354(glutamate dehydrogenase (NADP+) activity); GO:0016639(oxidoreductase activity, acting on the CH…	00220(Arginine biosynthesis); 00250(Alanine, aspartate and glutamate metabolism); 00910(Nitrogen metabolism)	K00262	ec:1.4.1.4	10.3776	10.3853	8.45769	97.8808	7.99526	19.3372	25.739	4.20609	2.07248	0.715505	2.89652	0.00377322	0.0808254	none
12984104	MGG_17429	NA	NA	uncharacterized protein	NA	NA	NA	NA	NA	20.7552	19.4724	18.7277	28.5486	54.3678	44.3619	31.0389	2.18268	1.1261	0.38923	2.89314	0.00381406	0.081098	none
5051289	MGG_11327	MGG_11327T0	Amino-acid permease inda1 [Source:UniProtKB/TrEMBL;Acc:G4MV66]	amino-acid permease inda1	protein_coding	GO:0016021(integral component of membrane); GO:0006865(amino acid transport); GO:0006810(transport); GO:0055085(transmembrane transport); GO:0016020(membrane); GO:0015171(amino acid transmembrane transporter activity)	NA	K16261	NA	70.6976	92.1693	103.305	122.351	143.915	197.922	121.727	1.75727	0.813332	0.281077	2.89363	0.00380815	0.081098	none
2682872	MGG_10671	MGG_10671T0	Pentalenene synthase [Source:UniProtKB/TrEMBL;Acc:G4N9T4]	pentalenene synthase	protein_coding	GO:0000287(magnesium ion binding); GO:0016829(lyase activity); GO:0010333(terpene synthase activity); GO:0005575(cellular_component); GO:0046872(metal ion binding)	NA	NA	NA	86.9126	62.9607	67.6615	42.8228	17.5896	42.0869	53.339	0.472006	-1.08312	0.374363	-2.89324	0.00381287	0.081098	none
2675048	MGG_00079	MGG_00079T1; MGG_00079T0	Putative uncharacterized protein [Source:UniProtKB/TrEMBL;Acc:G4NEQ3]	hypothetical protein, variant; uncharacterized protein	protein_coding	GO:0003674(molecular_function); GO:0008150(biological_process); GO:0005575(cellular_component)	NA	NA	NA	3.24301	9.08712	2.41648	26.5094	14.3915	15.9248	11.9287	3.81575	1.93197	0.668934	2.88813	0.00387541	0.0822005	none
2682724	MGG_02742	MGG_02742T0	Protein transporter Sec61 subunit gamma [Source:UniProtKB/TrEMBL;Acc:G4NJ55]	protein transporter Sec61 subunit gamma	protein_coding	GO:0015031(protein transport); GO:0006886(intracellular protein transport); GO:0016020(membrane); GO:0005622(intracellular); GO:0015450(P-P-bond-hydrolysis-driven protein transmembrane transporter activity); GO:0006605(protein targeting); GO:0016021(integral component of membrane); GO:0005789(endoplasmic reticulum membrane); GO:0071806(protein transmembrane transport)	03060(Protein export); 04141(Protein processing in endoplasmic reticulum); 04145(Phagosome)	K07342	NA	295.114	255.737	292.394	185.566	158.306	207.022	232.357	0.655205	-0.609982	0.211502	-2.88405	0.00392602	0.0830704	none
2682909	MGG_10705	MGG_10705T0	Putative uncharacterized protein [Source:UniProtKB/TrEMBL;Acc:G4NIB1]	uncharacterized protein	protein_coding	NA	NA	NA	NA	169.934	173.304	320.788	638.264	299.023	381.057	330.395	1.98006	0.985541	0.34207	2.88111	0.00396278	0.083304	none
2684639	MGG_06484	MGG_06484T0	Putative uncharacterized protein [Source:UniProtKB/TrEMBL;Acc:G4N6Z4]	uncharacterized protein	protein_coding	GO:0043581(obsolete mycelium development); GO:0003674(molecular_function); GO:0005575(cellular_component)	NA	NA	NA	124.531	148.639	152.238	201.879	244.655	209.297	180.207	1.54201	0.624813	0.216884	2.88086	0.00396594	0.083304	none
2676559	MGG_03274	MGG_03274T0	Putative uncharacterized protein [Source:UniProtKB/TrEMBL;Acc:G4N9H9]	uncharacterized protein	protein_coding	GO:0016787(hydrolase activity); GO:0008152(metabolic process); GO:0016798(hydrolase activity, acting on glycosyl bonds)	NA	NA	NA	71.3462	46.7337	55.5791	24.4702	31.981	27.2996	42.9016	0.484054	-1.04676	0.363296	-2.88129	0.00396054	0.083304	none
2681851	MGG_10252	MGG_10252T0	Putative uncharacterized protein [Source:UniProtKB/TrEMBL;Acc:Q2KEM0]	uncharacterized protein	protein_coding	GO:0043581(obsolete mycelium development); GO:0045735(nutrient reservoir activity); GO:0005575(cellular_component); GO:0046872(metal ion binding); GO:0033609(oxalate metabolic process)	NA	NA	NA	327.544	388.799	383.013	501.639	532.484	534.618	444.683	1.42792	0.51392	0.178516	2.87884	0.00399141	0.0836359	none
12985181	MGG_15139	NA	NA	uncharacterized protein	NA	NA	NA	NA	NA	132.315	157.726	118.408	197.801	212.674	222.947	173.645	1.55501	0.636923	0.221507	2.87541	0.00403506	0.0841432	none
2683437	MGG_07517	MGG_07517T0	Putative uncharacterized protein [Source:UniProtKB/TrEMBL;Acc:G4N1Q1]	uncharacterized protein	protein_coding	GO:0006355(regulation of transcription, DNA-templated); GO:0007165(signal transduction); GO:0000155(phosphorelay sensor kinase activity); GO:0000160(phosphorelay signal transduction system)	NA	NA	NA	503.963	673.745	718.904	154.978	307.018	480.018	473.104	0.499402	-1.00173	0.348346	-2.87566	0.00403183	0.0841432	none
2675079	MGG_00774	MGG_00774T0	Putative uncharacterized protein [Source:UniProtKB/TrEMBL;Acc:G4NEK5]	uncharacterized protein	protein_coding	GO:0006508(proteolysis); GO:0004185(serine-type carboxypeptidase activity); GO:0003674(molecular_function); GO:0008150(biological_process); GO:0005575(cellular_component); GO:0008168(methyltransferase activity)	NA	NA	NA	48.6451	55.1718	61.0162	26.5094	27.1839	28.4371	41.1606	0.499804	-1.00057	0.348091	-2.87444	0.00404746	0.0841989	none
2675569	MGG_05111	MGG_05111T0	Putative uncharacterized protein [Source:UniProtKB/TrEMBL;Acc:G4N4G2]	uncharacterized protein	protein_coding	GO:0003674(molecular_function); GO:0008150(biological_process); GO:0005575(cellular_component)	NA	NA	NA	84.3182	93.4675	36.8514	101.959	228.664	141.048	114.385	2.20368	1.13991	0.396729	2.87328	0.00406233	0.0842225	none
2679560	MGG_01885	MGG_01885T0	Beta-glucosidase [Source:UniProtKB/TrEMBL;Acc:G4MWP1]	beta-glucosidase	protein_coding	GO:0005975(carbohydrate metabolic process); GO:0008152(metabolic process); GO:0016787(hydrolase activity); GO:0004553(hydrolase activity, hydrolyzing O-glycosyl compounds); GO:0030245(cellulose catabolic process); GO:0016798(hydrolase activity, acting on glycosyl bonds); GO:0000272(polysaccharide catabolic process); GO:0008422(beta-glucosidase activity); GO:0102483(scopolin beta-glucosidase activ…	00460(Cyanoamino acid metabolism); 00500(Starch and sucrose metabolism)	K05349	ec:3.2.1.21	291.222	221.336	307.497	161.095	196.683	159.248	222.847	0.630058	-0.666444	0.231981	-2.87284	0.00406806	0.0842225	none
12984294	MGG_16061	MGG_16061T0	Putative uncharacterized protein [Source:UniProtKB/TrEMBL;Acc:G4MPL6]	uncharacterized protein	protein_coding	GO:0003674(molecular_function); GO:0008150(biological_process); GO:0005575(cellular_component)	NA	NA	NA	72.6434	98.011	98.4717	140.704	139.118	159.248	118.033	1.63562	0.709835	0.247175	2.87179	0.00408155	0.0843002	none
5051300	MGG_11340	NA	NA	uncharacterized protein	NA	NA	NA	NA	NA	249.712	218.74	236.815	399.68	386.971	290.058	296.996	1.5206	0.604642	0.211035	2.86513	0.00416843	0.0858896	none
5050828	MGG_11663	NA	NA	zinc-binding oxidoreductase CipB	NA	NA	NA	NA	NA	7.78322	10.3853	5.43709	30.5877	30.382	12.5123	16.1813	3.0532	1.61032	0.563393	2.85825	0.00425979	0.0871495	none
2680692	MGG_09693	NA	NA	uncharacterized protein	NA	NA	NA	NA	NA	51.2395	46.0847	53.7667	140.704	60.764	94.4112	74.4949	1.9418	0.957395	0.334889	2.85884	0.00425193	0.0871495	none
2674675	MGG_01026	MGG_01026T0	Hydroxymethylglutaryl-CoA synthase [Source:UniProtKB/TrEMBL;Acc:G4NCU0]	hydroxymethylglutaryl-CoA synthase	protein_coding	GO:0008152(metabolic process); GO:0003824(catalytic activity); GO:0006696(ergosterol biosynthetic process); GO:0004421(hydroxymethylglutaryl-CoA synthase activity); GO:0008299(isoprenoid biosynthetic process); GO:0005575(cellular_component); GO:0016740(transferase activity); GO:0006629(lipid metabolic process); GO:0006694(steroid biosynthetic process); GO:0008202(steroid metabolic process); GO:00…	00280(Valine, leucine and isoleucine degradation); 00650(Butanoate metabolism); 00900(Terpenoid backbone biosynthesis)	K01641	ec:2.3.3.10	260.738	223.933	291.186	185.566	161.504	159.248	213.696	0.650075	-0.621322	0.217314	-2.8591	0.00424841	0.0871495	none
12984189	MGG_16711	MGG_16711T0	Putative uncharacterized protein [Source:UniProtKB/TrEMBL;Acc:G4N3R7]	uncharacterized protein	protein_coding	GO:0005634(nucleus); GO:0006886(intracellular protein transport); GO:0005622(intracellular); GO:0008565(obsolete protein transporter activity); GO:0005737(cytoplasm); GO:0015031(protein transport); GO:0008536(Ran GTPase binding); GO:0006606(protein import into nucleus); GO:0034399(nuclear periphery)	03013(Nucleocytoplasmic transport)	K20221	NA	411.213	345.31	480.88	316.073	179.094	251.384	330.659	0.601461	-0.733456	0.256798	-2.85616	0.00428805	0.0875207	none
5051698	MGG_13549	NA	NA	uncharacterized protein	NA	NA	NA	NA	NA	11.6748	1.94724	18.1236	0	1.59905	0	5.55746	0.0523247	-4.25637	1.49146	-2.85382	0.00431974	0.0879601	none
2685016	MGG_06843	MGG_06843T0	Alpha-N-arabinofuranosidase 2 [Source:UniProtKB/TrEMBL;Acc:G4MMH2]	alpha-N-arabinofuranosidase 2	protein_coding	GO:0005975(carbohydrate metabolic process); GO:0004553(hydrolase activity, hydrolyzing O-glycosyl compounds); GO:0046373(L-arabinose metabolic process); GO:0046556(alpha-L-arabinofuranosidase activity); GO:0005575(cellular_component); GO:0016787(hydrolase activity); GO:0005576(extracellular region); GO:0008152(metabolic process); GO:0016798(hydrolase activity, acting on glycosyl bonds); GO:003122…	NA	NA	NA	978.74	643.887	836.103	636.225	463.725	432.244	665.154	0.621463	-0.686259	0.24057	-2.85263	0.0043359	0.0880818	none
5049311	MGG_13993	NA	NA	uncharacterized protein	NA	NA	NA	NA	NA	45.4021	49.3301	58.5997	159.056	83.1507	69.3865	77.4876	2.0033	1.00238	0.35201	2.84759	0.00440519	0.0892798	none
2679431	MGG_01229	MGG_01229T0	Putative uncharacterized protein [Source:UniProtKB/TrEMBL;Acc:G4MXJ3]	uncharacterized protein	protein_coding	GO:0003674(molecular_function); GO:0005575(cellular_component); GO:0016020(membrane); GO:0016021(integral component of membrane)	NA	NA	NA	244.523	358.292	257.355	340.543	562.866	534.618	383.033	1.67614	0.745141	0.261939	2.84471	0.00444516	0.0893628	none
2683378	MGG_07458	MGG_07458T0	Putative uncharacterized protein [Source:UniProtKB/TrEMBL;Acc:G4N170]	uncharacterized protein	protein_coding	GO:0008270(zinc ion binding); GO:0005634(nucleus); GO:0006355(regulation of transcription, DNA-templated); GO:0003700(DNA-binding transcription factor activity); GO:0000981(DNA-binding transcription factor activity, RNA polymerase II-specific); GO:0006357(regulation of transcription by RNA polymerase II); GO:0042025(host cell nucleus)	NA	NA	NA	156.313	170.708	143.781	199.84	276.636	247.972	199.208	1.54409	0.626755	0.220275	2.84533	0.00443649	0.0893628	none
12986071	MGG_16966	MGG_16966T0	Putative uncharacterized protein [Source:UniProtKB/TrEMBL;Acc:G4N2F5]	uncharacterized protein	protein_coding	GO:0008152(metabolic process); GO:0003824(catalytic activity); GO:0016829(lyase activity); GO:0005575(cellular_component)	00330(Arginine and proline metabolism); 00630(Glyoxylate and dicarboxylate metabolism)	K18123	ec:4.1.3.16	75.8864	47.3828	57.9956	30.5877	33.5801	25.0247	45.0762	0.487684	-1.03598	0.364222	-2.84437	0.00444998	0.0893628	none
2678067	MGG_04744	MGG_04744T0	Cysteine desulfurase [Source:UniProtKB/TrEMBL;Acc:G4MTQ9]	cysteine desulfurase	protein_coding	GO:0008152(metabolic process); GO:0030170(pyridoxal phosphate binding); GO:0003824(catalytic activity); GO:0005575(cellular_component)	NA	NA	NA	69.4004	76.5914	42.2884	32.6269	30.382	27.2996	46.4315	0.476617	-1.0691	0.375871	-2.84432	0.00445059	0.0893628	none
2680190	MGG_09254	NA	NA	20S-pre-rRNA D-site endonuclease NOB1	NA	NA	03008(Ribosome biogenesis in eukaryotes)	K11883	NA	66.1574	52.5755	71.2862	36.7053	28.7829	32.987	48.0824	0.515774	-0.955189	0.336092	-2.84205	0.00448248	0.0897948	none
2681146	MGG_01931	MGG_01931T0	Siderophore iron transporter mirB [Source:UniProtKB/TrEMBL;Acc:G4NG10]	siderophore iron transporter mirB	protein_coding	GO:0016021(integral component of membrane); GO:0043581(obsolete mycelium development); GO:0055085(transmembrane transport); GO:0016020(membrane); GO:0022857(transmembrane transporter activity)	NA	NA	NA	147.233	277.806	99.6799	254.898	506.9	340.108	271.104	2.10257	1.07216	0.377653	2.83899	0.00452563	0.0904498	none
2678965	MGG_08799	MGG_08799T0	Putative uncharacterized protein [Source:UniProtKB/TrEMBL;Acc:G4NFJ8]	uncharacterized protein	protein_coding	GO:0003674(molecular_function); GO:0008150(biological_process); GO:0005575(cellular_component)	NA	NA	NA	11.0262	13.6307	11.4783	48.9404	20.7877	25.0247	21.8147	2.5675	1.36036	0.479413	2.83756	0.00454599	0.0906474	none
2677446	MGG_04013	MGG_04013T0	Small nuclear ribonucleoprotein Sm D2 [Source:UniProtKB/TrEMBL;Acc:G4NGW0]	small nuclear ribonucleoprotein Sm D2	protein_coding	GO:0003676(nucleic acid binding); GO:0008380(RNA splicing); GO:0030529(GO_0030529); GO:0030532(small nuclear ribonucleoprotein complex); GO:0019013(viral nucleocapsid); GO:0003674(molecular_function); GO:0006397(mRNA processing); GO:0005634(nucleus)	03040(Spliceosome)	K11096	NA	72.6434	85.0294	93.0346	44.862	49.5706	46.6369	65.2961	0.563166	-0.828369	0.292876	-2.8284	0.00467818	0.093069	none
2684334	MGG_06156	MGG_06156T1; MGG_06156T0	Putative uncharacterized protein [Source:UniProtKB/TrEMBL;Acc:G4MZZ1]	hypothetical protein, variant; uncharacterized protein	protein_coding	GO:0003674(molecular_function); GO:0008150(biological_process); GO:0005575(cellular_component); GO:0016020(membrane); GO:0016021(integral component of membrane); GO:0005515(protein binding)	NA	NA	NA	110.262	149.937	103.909	132.547	305.419	237.734	173.301	1.86375	0.898211	0.317658	2.82761	0.00468971	0.0930842	none
2679487	MGG_01255	MGG_01255T0	Putative uncharacterized protein [Source:UniProtKB/TrEMBL;Acc:G4MXM8]	uncharacterized protein	protein_coding	GO:0003824(catalytic activity); GO:0030246(carbohydrate binding); GO:0016052(carbohydrate catabolic process); GO:0003674(molecular_function); GO:0008150(biological_process); GO:0005575(cellular_component); GO:0016020(membrane); GO:0016021(integral component of membrane)	NA	NA	NA	298.357	204.46	190.902	83.6065	135.919	161.523	179.128	0.554981	-0.849489	0.300701	-2.82502	0.0047277	0.0936236	none
2682054	MGG_10487	NA	NA	uncharacterized protein	NA	NA	NA	NA	NA	67.4546	79.8368	66.4533	132.547	84.7498	164.935	99.3294	1.79752	0.846006	0.299622	2.82358	0.00474911	0.0936558	none
2679129	MGG_01387	MGG_01387T0	Endonuclease/exonuclease/phosphatase [Source:UniProtKB/TrEMBL;Acc:G4MZ56]	endonuclease/exonuclease/phosphatase	protein_coding	GO:0004519(endonuclease activity); GO:0004527(exonuclease activity); GO:0005575(cellular_component); GO:0090305(nucleic acid phosphodiester bond hydrolysis)	NA	NA	NA	218.579	144.096	208.422	108.077	135.919	90.9987	151.015	0.584202	-0.775462	0.27465	-2.82345	0.00475097	0.0936558	none
2685004	MGG_11820	NA	NA	uncharacterized protein	NA	NA	NA	NA	NA	33.7273	42.1902	42.2884	69.3322	75.1555	67.1116	54.9675	1.78703	0.837563	0.296907	2.82096	0.00478797	0.0940038	none
2682272	MGG_10659	NA	NA	uncharacterized protein	NA	NA	NA	NA	NA	97.2902	95.4147	86.3893	126.429	220.669	134.223	126.736	1.72555	0.787054	0.279018	2.8208	0.00479035	0.0940038	none
2674528	MGG_00183	MGG_00183T0	STE/STE11 protein kinase [Source:UniProtKB/TrEMBL;Acc:G4NDX1]	STE/STE11 protein kinase	protein_coding	GO:0005524(ATP binding); GO:0004672(protein kinase activity); GO:0000166(nucleotide binding); GO:0004674(protein serine/threonine kinase activity); GO:0006468(protein phosphorylation); GO:0016772(transferase activity, transferring phosphorus-containing groups); GO:0004709(MAP kinase kinase kinase activity); GO:0016301(kinase activity); GO:0016310(phosphorylation); GO:0016740(transferase activity)…	04011(MAPK signaling pathway - yeast)	K11230	ec:2.7.11.25	141.395	125.921	146.197	65.2538	54.3678	106.924	106.676	0.556351	-0.845932	0.299984	-2.81992	0.00480353	0.0940493	none
2674967	MGG_00722	MGG_00722T0	Putative uncharacterized protein [Source:UniProtKB/TrEMBL;Acc:G4NEX3]	uncharacterized protein	protein_coding	GO:0016787(hydrolase activity)	NA	NA	NA	48.6451	72.6969	38.0596	61.1755	286.23	80.7614	97.9281	2.68873	1.42693	0.506585	2.81675	0.00485121	0.0947683	none
2674813	MGG_00851	MGG_00851T0	Putative uncharacterized protein [Source:UniProtKB/TrEMBL;Acc:G4NE08]	uncharacterized protein	protein_coding	GO:0005737(cytoplasm); GO:0005634(nucleus); GO:0006364(rRNA processing); GO:0016740(transferase activity); GO:0042254(ribosome biogenesis); GO:1904047(S-adenosyl-L-methionine binding); GO:0000455(enzyme-directed rRNA pseudouridine synthesis)	NA	K09140	NA	34.3759	29.8577	39.872	8.15673	14.3915	18.1997	24.1422	0.406317	-1.29932	0.461865	-2.81321	0.00490492	0.0956018	none
2684348	MGG_06212	MGG_06212T0	Putative uncharacterized protein [Source:UniProtKB/TrEMBL;Acc:G4N0F9]	uncharacterized protein	protein_coding	GO:0008150(biological_process)	NA	NA	NA	25.9441	33.7521	33.8308	34.6661	115.132	61.4242	50.7915	2.27011	1.18276	0.421138	2.80849	0.0049775	0.0967985	none
2682642	MGG_03089	MGG_03089T0	Transmembrane BAX inhibitor domain-containing protein-containing protein 4 [Source:UniProtKB/TrEMBL;Acc:G5EI05]	transmembrane BAX inhibitor domain-containing protein-containing protein 4	protein_coding	GO:0016021(integral component of membrane); GO:0043581(obsolete mycelium development); GO:0016020(membrane); GO:0005575(cellular_component)	NA	K24205	NA	73.292	64.2589	71.2862	83.6065	179.094	117.161	98.1164	1.82593	0.868629	0.309405	2.80742	0.00499407	0.0969029	none
2684471	MGG_06316	MGG_06316T0	Curved DNA-binding protein [Source:UniProtKB/TrEMBL;Acc:G4N849]	curved DNA-binding protein	protein_coding	GO:0003677(DNA binding); GO:0016787(hydrolase activity); GO:0005575(cellular_component)	NA	NA	NA	609.037	619.871	706.217	491.443	311.815	453.856	532.04	0.649108	-0.623471	0.22216	-2.80641	0.00500975	0.0969896	none
2680434	MGG_09354	NA	NA	uncharacterized protein	NA	NA	NA	NA	NA	10.3776	5.84172	16.9154	26.5094	17.5896	54.5992	21.9722	3.02178	1.5954	0.569169	2.80303	0.00506244	0.0975732	none
2678760	MGG_08446	MGG_08446T0	Sugar transporter [Source:UniProtKB/TrEMBL;Acc:G4NA76]	sugar transporter	protein_coding	GO:0016021(integral component of membrane); GO:0006810(transport); GO:0055085(transmembrane transport); GO:0008643(carbohydrate transport); GO:0016020(membrane); GO:0022891(GO_0022891); GO:0022857(transmembrane transporter activity)	NA	NA	NA	339.867	360.888	326.225	181.487	203.08	275.271	281.136	0.647408	-0.627254	0.223746	-2.80341	0.0050565	0.0975732	none
2675106	MGG_00046	MGG_00046T0	Putative uncharacterized protein [Source:UniProtKB/TrEMBL;Acc:G4NEU1]	uncharacterized protein	protein_coding	GO:0003674(molecular_function); GO:0008150(biological_process); GO:0005575(cellular_component)	NA	NA	NA	67.4546	83.7313	68.2656	42.8228	38.3773	39.8119	56.7439	0.549921	-0.862705	0.30789	-2.80199	0.00507884	0.0976718	none
2683774	MGG_07847	NA	NA	uncharacterized protein	NA	NA	NA	NA	NA	9.08042	1.94724	2.41648	4.07836	23.9858	34.1245	12.6055	4.74951	2.24778	0.802958	2.79937	0.00512019	0.0982485	none
12984135	MGG_16668	MGG_16668T0	Putative uncharacterized protein [Source:UniProtKB/TrEMBL;Acc:G4N2Z8]	uncharacterized protein	protein_coding	GO:0003674(molecular_function); GO:0008150(biological_process); GO:0005575(cellular_component)	NA	NA	NA	142.044	181.093	114.783	167.213	455.73	244.559	217.57	1.98422	0.988572	0.35324	2.79859	0.00513266	0.0982699	none
12984886	MGG_15019	NA	NA	peroxisomal copper amine oxidase	NA	NA	00260(Glycine, serine and threonine metabolism); 00350(Tyrosine metabolism); 00360(Phenylalanine metabolism); 00410(beta-Alanine metabolism)	K00276	ec:1.4.3.21	53.8339	53.8736	47.1214	55.0579	131.122	108.061	74.845	1.91885	0.940242	0.336115	2.79738	0.00515186	0.0984199	none
2679205	MGG_01828	MGG_01828T0	Ribose-phosphate pyrophosphokinase 1 [Source:UniProtKB/TrEMBL;Acc:G4MW80]	ribose-phosphate pyrophosphokinase 1	protein_coding	GO:0000287(magnesium ion binding); GO:0004749(ribose phosphate diphosphokinase activity); GO:0016301(kinase activity); GO:0009165(nucleotide biosynthetic process); GO:0016310(phosphorylation); GO:0009156(ribonucleoside monophosphate biosynthetic process); GO:0005575(cellular_component); GO:0005524(ATP binding); GO:0016740(transferase activity); GO:0046872(metal ion binding); GO:0009116(nucleoside…	00030(Pentose phosphate pathway); 00230(Purine metabolism); 01230(Biosynthesis of amino acids)	K00948	ec:2.7.6.1	155.016	158.375	189.09	91.7632	84.7498	126.261	134.209	0.608369	-0.716981	0.256652	-2.79359	0.00521261	0.0993611	none
2674650	MGG_00274	MGG_00274T0	Membrane-associated progesterone receptor component 1 [Source:UniProtKB/TrEMBL;Acc:G4NDA1]	membrane-associated progesterone receptor component 1	protein_coding	GO:0020037(heme binding); GO:0004872(GO_0004872); GO:0016020(membrane); GO:0016021(integral component of membrane)	NA	K17278	NA	96.6416	73.346	49.5379	71.3714	271.839	156.973	119.951	2.28715	1.19355	0.427372	2.79276	0.005226	0.0993973	none
2674793	MGG_01075	MGG_01075T0	Putative uncharacterized protein [Source:UniProtKB/TrEMBL;Acc:G4NCI2]	uncharacterized protein	protein_coding	GO:0003674(molecular_function); GO:0008150(biological_process); GO:0005575(cellular_component)	NA	NA	NA	154.367	166.813	51.9544	144.782	537.282	257.071	218.712	2.52041	1.33366	0.477798	2.79126	0.00525031	0.0996407	none
2675102	MGG_00387	MGG_00387T0	Putative uncharacterized protein [Source:UniProtKB/TrEMBL;Acc:G4NCF6]	uncharacterized protein	protein_coding	GO:0016020(membrane); GO:0016021(integral component of membrane)	NA	NA	NA	12.3234	5.19264	5.43709	14.2743	51.1697	14.7873	17.1974	3.4979	1.80649	0.649	2.7835	0.00537759	0.101441	none
2684324	MGG_06166	MGG_06166T0	Putative uncharacterized protein [Source:UniProtKB/TrEMBL;Acc:G4N002]	uncharacterized protein	protein_coding	GO:0003674(molecular_function); GO:0008150(biological_process); GO:0005575(cellular_component); GO:0016020(membrane); GO:0016021(integral component of membrane)	NA	NA	NA	29.8357	32.454	32.6225	61.1755	65.5611	50.0493	45.283	1.8496	0.887214	0.318759	2.78333	0.00538036	0.101441	none
2674928	MGG_00633	MGG_00633T0	Potassium:hydrogen antiporter [Source:UniProtKB/TrEMBL;Acc:G4NB37]	potassium:hydrogen antiporter	protein_coding	GO:0016021(integral component of membrane); GO:0006810(transport); GO:0055085(transmembrane transport); GO:0006812(cation transport); GO:0015299(solute:proton antiporter activity); GO:0016020(membrane); GO:1902600(proton transmembrane transport)	NA	NA	NA	121.288	110.993	115.991	65.2538	47.9716	85.3113	91.1348	0.576425	-0.794795	0.285413	-2.78472	0.0053574	0.101441	none
12986476	MGG_15354	MGG_15354T0	Putative uncharacterized protein [Source:UniProtKB/TrEMBL;Acc:G4NAP8]	uncharacterized protein	protein_coding	GO:0016020(membrane); GO:0016021(integral component of membrane)	NA	NA	NA	75.8864	73.346	112.971	38.7445	47.9716	52.3243	66.8739	0.535373	-0.901384	0.323961	-2.78238	0.00539617	0.101518	none
2684632	MGG_12828	MGG_12828T0	Putative uncharacterized protein [Source:UniProtKB/TrEMBL;Acc:G4N703]	uncharacterized protein	protein_coding	GO:0016787(hydrolase activity); GO:0006629(lipid metabolic process); GO:0004806(triglyceride lipase activity)	00561(Glycerolipid metabolism); 04138(Autophagy - yeast)	K17900	ec:3.1.1.3	74.5892	58.4172	77.9316	103.998	132.721	112.611	93.3781	1.65775	0.729225	0.262158	2.78162	0.00540881	0.101536	none
2678875	MGG_08639	NA	NA	uncharacterized protein	NA	NA	NA	NA	NA	124.531	142.148	141.364	193.722	195.084	221.809	169.777	1.50089	0.585815	0.21084	2.77848	0.00546146	0.102302	none
5051327	MGG_11371	NA	NA	uncharacterized protein	NA	NA	NA	NA	NA	67.4546	44.1374	53.7667	16.3135	33.5801	27.2996	40.4253	0.474561	-1.07534	0.387175	-2.77739	0.00547977	0.102423	none
2674559	MGG_01025	MGG_01025T0	Putative uncharacterized protein [Source:UniProtKB/TrEMBL;Acc:G4NCU1]	uncharacterized protein	protein_coding	GO:0003674(molecular_function); GO:0008150(biological_process); GO:0005575(cellular_component)	NA	NA	NA	20.7552	20.7706	13.8948	20.3918	92.745	36.3995	34.1595	2.71195	1.43933	0.51902	2.77317	0.00555125	0.103313	none
5051083	MGG_12489	NA	NA	beta-xylosidase	NA	NA	00520(Amino sugar and nucleotide sugar metabolism)	K15920	ec:3.2.1.37	14.2692	7.78896	10.2701	0	0	2.27497	5.7672	0.0890668	-3.48897	1.25788	-2.7737	0.00554234	0.103313	none
5050252	MGG_13326	MGG_13326T0	Putative uncharacterized protein [Source:UniProtKB/TrEMBL;Acc:G4MZS9]	uncharacterized protein	protein_coding	GO:0016021(integral component of membrane); GO:0009055(electron transfer activity); GO:0005506(iron ion binding); GO:0050660(flavin adenine dinucleotide binding); GO:0016020(membrane); GO:0016491(oxidoreductase activity); GO:0055114(oxidation-reduction process); GO:0006811(ion transport)	NA	NA	NA	34.3759	45.4356	40.4761	34.6661	127.924	102.374	64.2086	2.22446	1.15346	0.416335	2.7705	0.00559696	0.10394	none
2683340	MGG_07420	MGG_07420T0	Putative uncharacterized protein [Source:UniProtKB/TrEMBL;Acc:G4N0R5]	uncharacterized protein	protein_coding	GO:0016020(membrane); GO:0016021(integral component of membrane)	NA	NA	NA	11.0262	16.227	17.5195	2.03918	0	5.68742	8.74989	0.191262	-2.38638	0.861597	-2.76972	0.00561046	0.103968	none
2675407	MGG_05010	MGG_05010T0	Putative uncharacterized protein [Source:UniProtKB/TrEMBL;Acc:G4N3T4]	uncharacterized protein	protein_coding	NA	NA	NA	NA	297.708	275.21	348.578	250.819	116.731	169.485	243.088	0.579274	-0.787682	0.284467	-2.76897	0.0056233	0.103983	none
2679366	MGG_01689	MGG_01689T0	Rho GDP dissociation inhibitor [Source:UniProtKB/TrEMBL;Acc:G4MUU2]	rho GDP dissociation inhibitor	protein_coding	GO:0005737(cytoplasm); GO:0005094(Rho GDP-dissociation inhibitor activity); GO:0050790(regulation of catalytic activity)	NA	K12462	NA	240.631	249.896	222.921	187.605	147.113	137.636	197.633	0.656999	-0.606037	0.219378	-2.76252	0.00573571	0.105681	none
2679507	MGG_01561	MGG_01561T0	Nucleolar GTP-binding protein 2 [Source:UniProtKB/TrEMBL;Acc:G4MTH8]	nucleolar GTP-binding protein 2	protein_coding	GO:0005730(nucleolus); GO:0005654(nucleoplasm); GO:0030687(preribosome, large subunit precursor); GO:0005525(GTP binding); GO:0000055(ribosomal large subunit export from nucleus); GO:0000166(nucleotide binding); GO:0005634(nucleus)	03008(Ribosome biogenesis in eukaryotes)	K14537	NA	163.448	171.357	223.525	116.233	84.7498	133.086	148.733	0.600604	-0.735513	0.266268	-2.7623	0.00573955	0.105681	none
2680117	MGG_09162	NA	NA	cytochrome b2	NA	NA	NA	NA	NA	320.409	162.27	256.147	101.959	115.132	178.585	189.084	0.540022	-0.88891	0.321944	-2.76107	0.00576129	0.105856	none
2674630	MGG_00501	MGG_00501T0	CGBP1 [Source:UniProtKB/TrEMBL;Acc:G4NBR8]	CGBP1	protein_coding	GO:0046872(metal ion binding); GO:0003676(nucleic acid binding); GO:0008270(zinc ion binding); GO:0009405(pathogenesis); GO:0005622(intracellular); GO:0008150(biological_process)	NA	K21545	NA	358.677	387.501	332.266	409.876	714.776	571.017	462.352	1.57522	0.655558	0.23768	2.75815	0.00581287	0.106578	none
2682231	MGG_14303	MGG_14303T0	Beta-xylosidase [Source:UniProtKB/TrEMBL;Acc:G4MQC3]	beta-xylosidase	protein_coding	GO:0005975(carbohydrate metabolic process); GO:0004553(hydrolase activity, hydrolyzing O-glycosyl compounds); GO:0005575(cellular_component); GO:0016787(hydrolase activity); GO:0008152(metabolic process); GO:0016798(hydrolase activity, acting on glycosyl bonds)	00520(Amino sugar and nucleotide sugar metabolism)	K01198	ec:3.2.1.37	95.3444	92.8184	76.1192	61.1755	49.5706	40.9494	69.3296	0.565243	-0.823056	0.298607	-2.75632	0.00584555	0.10695	none
2682702	MGG_02695	MGG_02695T0	Cysteine proteinase 1 [Source:UniProtKB/TrEMBL;Acc:G5EHT3]	cysteine proteinase 1	protein_coding	GO:0006508(proteolysis); GO:0004197(cysteine-type endopeptidase activity); GO:0005575(cellular_component); GO:0005739(mitochondrion); GO:0005737(cytoplasm); GO:0016787(hydrolase activity); GO:0008233(peptidase activity); GO:0008234(cysteine-type peptidase activity); GO:0003677(DNA binding)	NA	K01372	ec:3.4.22.40	81.0752	96.7129	80.9522	146.821	164.702	112.611	113.812	1.63048	0.705296	0.256091	2.75408	0.00588568	0.107457	none
2674148	MGG_00824	MGG_00824T0	Putative uncharacterized protein [Source:UniProtKB/TrEMBL;Acc:G4NE92]	uncharacterized protein	protein_coding	GO:0008152(metabolic process); GO:0016491(oxidoreductase activity); GO:0055114(oxidation-reduction process); GO:0003674(molecular_function); GO:0008150(biological_process); GO:0005575(cellular_component)	NA	NA	NA	666.762	520.562	369.118	501.639	1647.02	1032.84	789.657	2.04563	1.03255	0.375581	2.74919	0.00597419	0.108843	none
2682535	MGG_02982	MGG_02982T0	Averantin oxidoreductase [Source:UniProtKB/TrEMBL;Acc:G5EGY1]	averantin oxidoreductase	protein_coding	GO:0046872(metal ion binding); GO:0009055(electron transfer activity); GO:0020037(heme binding); GO:0005506(iron ion binding); GO:0016491(oxidoreductase activity); GO:0055114(oxidation-reduction process); GO:0004497(monooxygenase activity); GO:0016705(oxidoreductase activity, acting on paired donors, with incorporation or reduction of molecular oxygen); GO:0005575(cellular_component); GO:0016020(…	NA	NA	NA	628.495	623.766	258.564	536.305	1715.78	1054.45	802.893	2.18993	1.13089	0.411824	2.74604	0.00603189	0.109664	none
2679005	MGG_08783	NA	NA	uncharacterized protein	NA	NA	NA	NA	NA	11.0262	5.19264	5.43709	20.3918	43.1744	10.2374	15.9099	3.37802	1.75618	0.640338	2.74258	0.00609591	0.110595	none
2683718	MGG_07791	MGG_07791T0	Surface protein 1 [Source:UniProtKB/TrEMBL;Acc:G4N126]	surface protein 1	protein_coding	GO:0003674(molecular_function); GO:0008150(biological_process); GO:0005575(cellular_component)	NA	NA	NA	88.2098	131.114	54.3709	118.273	380.574	139.911	152.075	2.33572	1.22387	0.447715	2.73359	0.00626482	0.112559	none
2675678	MGG_05125	MGG_05125T0	Putative uncharacterized protein [Source:UniProtKB/TrEMBL;Acc:G4N4H8]	uncharacterized protein	protein_coding	GO:0003824(catalytic activity); GO:0009116(nucleoside metabolic process); GO:0005515(protein binding)	NA	NA	NA	33.7273	63.6098	32.6225	65.2538	119.929	78.4864	65.6048	2.03477	1.02487	0.375415	2.72996	0.00633421	0.112559	none
2683123	MGG_07235	MGG_07235T0	Putative uncharacterized protein [Source:UniProtKB/TrEMBL;Acc:G4MU47]	uncharacterized protein	protein_coding	NA	NA	NA	NA	33.7273	45.4356	26.5813	83.6065	70.3583	52.3243	52.0055	1.93128	0.949555	0.347792	2.73024	0.00632885	0.112559	none
2679111	MGG_01637	MGG_01637T0	Phosphomannomutase [Source:UniProtKB/TrEMBL;Acc:G4MUD1]	phosphomannomutase	protein_coding	GO:0005737(cytoplasm); GO:0008152(metabolic process); GO:0003824(catalytic activity); GO:0004615(phosphomannomutase activity); GO:0009298(GDP-mannose biosynthetic process); GO:0019307(mannose biosynthetic process); GO:0016853(isomerase activity)	00051(Fructose and mannose metabolism); 00520(Amino sugar and nucleotide sugar metabolism); 01240(Biosynthesis of cofactors); 01250(Biosynthesis of nucleotide sugars)	K17497	ec:5.4.2.8	155.016	194.724	164.925	110.116	99.1412	119.436	140.56	0.640573	-0.642565	0.235146	-2.73261	0.00628337	0.112559	none
2680542	MGG_09505	NA	NA	polyadenylate-binding protein	NA	NA	03015(mRNA surveillance pathway); 03018(RNA degradation)	K13126	NA	383.324	374.519	443.425	314.034	159.905	258.209	322.236	0.607926	-0.718032	0.262667	-2.73362	0.00626425	0.112559	none
5050370	MGG_13447	NA	NA	atypical/RIO/RIO1 protein kinase	NA	NA	03008(Ribosome biogenesis in eukaryotes)	K07178	ec:2.7.11.1	83.6696	81.784	98.4717	53.0187	47.9716	53.4618	69.7296	0.585415	-0.772467	0.282782	-2.73167	0.00630134	0.112559	none
2675714	MGG_05310	MGG_05310T0	Sideroflexin-5 [Source:UniProtKB/TrEMBL;Acc:G4N5S5]	sideroflexin-5	protein_coding	GO:0005739(mitochondrion); GO:0055085(transmembrane transport); GO:0016020(membrane); GO:0008324(cation transmembrane transporter activity); GO:0006812(cation transport); GO:0016021(integral component of membrane); GO:0031966(mitochondrial membrane); GO:0006865(amino acid transport); GO:0006811(ion transport); GO:0015075(ion transmembrane transporter activity); GO:0022889(serine transmembrane tra…	NA	K23503	NA	51.8881	69.4515	65.8492	28.5486	39.9763	29.5746	47.548	0.523883	-0.932684	0.341003	-2.73512	0.00623584	0.112559	none
2678789	MGG_08527	NA	NA	uncharacterized protein	NA	NA	NA	NA	NA	94.0472	54.5227	69.4739	44.862	36.7782	31.8496	55.2556	0.513809	-0.960696	0.351264	-2.73497	0.0062386	0.112559	none
2678324	MGG_08129	NA	NA	lysine-specific permease	NA	NA	NA	K16261	NA	47.3479	30.5067	21.1442	20.3918	7.99526	7.96239	22.5581	0.350935	-1.51073	0.553279	-2.73049	0.00632394	0.112559	none
2680980	MGG_10023	NA	NA	uncharacterized protein	NA	NA	NA	NA	NA	18.1608	38.2957	22.3525	0	7.99526	12.5123	16.5528	0.283227	-1.81997	0.666065	-2.73242	0.00628712	0.112559	none
2682308	MGG_02708	MGG_02708T0	Putative uncharacterized protein [Source:UniProtKB/TrEMBL;Acc:G4NJ93]	uncharacterized protein	protein_coding	GO:0043581(obsolete mycelium development); GO:0003674(molecular_function); GO:0005575(cellular_component); GO:0016020(membrane); GO:0016021(integral component of membrane)	NA	NA	NA	289.925	225.88	212.65	381.327	338.999	361.72	301.75	1.4848	0.570267	0.209362	2.72383	0.00645298	0.114435	none
2677381	MGG_04329	MGG_04329T0	Putative uncharacterized protein [Source:UniProtKB/TrEMBL;Acc:G4NGF4]	uncharacterized protein	protein_coding	GO:0016021(integral component of membrane); GO:0055085(transmembrane transport); GO:0003674(molecular_function); GO:0008150(biological_process); GO:0005575(cellular_component); GO:0016020(membrane); GO:0022857(transmembrane transporter activity)	NA	NA	NA	47.9965	35.0503	28.9978	116.233	73.5564	46.6369	58.0785	2.07947	1.05622	0.389277	2.71328	0.00666206	0.117901	none
12985134	MGG_17539	NA	NA	ATP-dependent rRNA helicase RRP3	NA	NA	NA	K14777	ec:3.6.4.13	49.9423	52.5755	67.6615	22.431	30.382	32.987	42.6632	0.512075	-0.965574	0.35664	-2.70742	0.00678083	0.119758	none
2679904	MGG_08918	NA	NA	ATP-binding cassette sub-family G member 2	NA	NA	NA	NA	NA	16.215	9.7362	20.5401	42.8228	27.1839	37.537	25.6725	2.29985	1.20154	0.444	2.70617	0.00680633	0.119963	none
2678318	MGG_08060	MGG_08060T0	Cycloheximide resistance protein [Source:UniProtKB/TrEMBL;Acc:G4MXR8]	cycloheximide resistance protein	protein_coding	GO:0016021(integral component of membrane); GO:0055085(transmembrane transport); GO:0016020(membrane); GO:0022857(transmembrane transporter activity)	NA	NA	NA	20.7552	29.2086	22.9566	34.6661	142.316	28.4371	46.3899	2.81324	1.49223	0.551736	2.70461	0.00683843	0.120054	none
2683835	MGG_07908	MGG_07908T0	Exoglucanase 3 [Source:UniProtKB/TrEMBL;Acc:G4N2D8]	exoglucanase 3	protein_coding	GO:0005975(carbohydrate metabolic process); GO:0030245(cellulose catabolic process); GO:0004553(hydrolase activity, hydrolyzing O-glycosyl compounds); GO:0005575(cellular_component); GO:0016787(hydrolase activity); GO:0008152(metabolic process); GO:0016798(hydrolase activity, acting on glycosyl bonds); GO:0000272(polysaccharide catabolic process)	00500(Starch and sucrose metabolism)	K19668	ec:3.2.1.91	36.9703	7.78896	22.9566	10.1959	4.79716	1.13748	13.9744	0.218697	-2.19299	0.810847	-2.70457	0.00683923	0.120054	none
2678974	MGG_08808	MGG_08808T0	Putative uncharacterized protein [Source:UniProtKB/TrEMBL;Acc:G4NFI9]	uncharacterized protein	protein_coding	GO:0016021(integral component of membrane); GO:0003674(molecular_function); GO:0008150(biological_process); GO:0016020(membrane)	NA	NA	NA	56.4283	57.119	64.6409	114.194	115.132	76.2114	80.6209	1.69758	0.763481	0.282511	2.70249	0.00688229	0.120349	none
2682728	MGG_02746	MGG_02746T0	Putative uncharacterized protein [Source:UniProtKB/TrEMBL;Acc:G5EHY7]	uncharacterized protein	protein_coding	GO:0003677(DNA binding); GO:0005634(nucleus); GO:0006355(regulation of transcription, DNA-templated); GO:0003682(chromatin binding)	NA	NA	NA	79.1294	64.908	58.5997	101.959	111.934	114.886	88.5693	1.62852	0.703565	0.260347	2.70241	0.00688382	0.120349	none
2679449	MGG_01593	MGG_01593T0	Putative uncharacterized protein [Source:UniProtKB/TrEMBL;Acc:G4MTX1]	uncharacterized protein	protein_coding	GO:0003674(molecular_function); GO:0005575(cellular_component); GO:0016020(membrane); GO:0016021(integral component of membrane)	NA	NA	NA	363.217	497.195	334.079	444.542	849.097	708.653	532.797	1.67908	0.747667	0.276777	2.70134	0.00690616	0.120496	none
2682284	MGG_02529	MGG_02529T0	Putative uncharacterized protein [Source:UniProtKB/TrEMBL;Acc:G5EHJ1]	uncharacterized protein	protein_coding	GO:0008237(metallopeptidase activity); GO:0006508(proteolysis)	NA	NA	NA	90.8042	112.94	117.199	167.213	161.504	163.798	135.576	1.53333	0.616672	0.228623	2.69733	0.00698969	0.121696	none
12987356	MGG_15624	NA	NA	MFS transporter	NA	NA	NA	NA	NA	268.521	308.313	283.937	167.213	225.466	186.547	240	0.674199	-0.568754	0.210907	-2.6967	0.00700307	0.121696	none
2678891	MGG_08649	NA	NA	farnesyl pyrophosphate synthase	NA	NA	00900(Terpenoid backbone biosynthesis)	K00787	ec:2.5.1.1	226.362	267.421	242.857	185.566	156.707	158.11	206.17	0.676516	-0.563805	0.209339	-2.69327	0.00707556	0.122709	none
2680782	MGG_09830	MGG_09830T0	AAA family ATPase [Source:UniProtKB/TrEMBL;Acc:G4NII3]	AAA family ATPase	protein_coding	GO:0005524(ATP binding); GO:0043581(obsolete mycelium development); GO:0000166(nucleotide binding); GO:0017111(nucleoside-triphosphatase activity); GO:0008150(biological_process)	NA	NA	NA	72.6434	90.2221	87.5975	85.6457	249.452	149.01	122.429	1.93975	0.955874	0.355041	2.69229	0.00709633	0.122823	none
2674332	MGG_00678	MGG_00678T0	Putative uncharacterized protein [Source:UniProtKB/TrEMBL;Acc:G4NAZ0]	uncharacterized protein	protein_coding	NA	NA	NA	NA	28.5385	37.6466	42.8926	128.468	49.5706	56.8742	57.3318	2.12103	1.08477	0.403916	2.68563	0.00723936	0.1248	none
2680760	MGG_09761	NA	NA	uncharacterized protein	NA	NA	NA	NA	NA	217.93	183.04	175.195	401.719	268.641	249.109	249.272	1.58757	0.666823	0.248272	2.68586	0.00723432	0.1248	none
2684287	MGG_06111	MGG_06111T0	Mitotic checkpoint protein BUB3 [Source:UniProtKB/TrEMBL;Acc:G4N5H8]	mitotic checkpoint protein BUB3	protein_coding	GO:0003674(molecular_function); GO:0005515(protein binding)	04111(Cell cycle - yeast)	K02180	NA	80.4266	72.0479	93.0346	44.862	47.9716	48.9118	64.5424	0.579096	-0.788126	0.293903	-2.68159	0.00732738	0.126066	none
2675394	MGG_04984	MGG_04984T0	Putative uncharacterized protein [Source:UniProtKB/TrEMBL;Acc:G4N3K1]	uncharacterized protein	protein_coding	GO:0016740(transferase activity); GO:0016020(membrane); GO:0016021(integral component of membrane)	NA	K03377	ec:2.3.1.45	108.316	75.2933	83.3687	61.1755	41.5754	48.9118	69.7735	0.563569	-0.827335	0.308828	-2.67895	0.0073854	0.126561	none
2681293	MGG_02223	MGG_02223T0	Putative uncharacterized protein [Source:UniProtKB/TrEMBL;Acc:G4MPM7]	uncharacterized protein	protein_coding	GO:0003674(molecular_function); GO:0008150(biological_process); GO:0005575(cellular_component)	NA	NA	NA	14.2692	11.6834	12.6865	2.03918	4.79716	1.13748	7.76884	0.198698	-2.33135	0.870052	-2.67955	0.00737213	0.126561	none
2682671	MGG_02783	MGG_02783T0	Lactose permease [Source:UniProtKB/TrEMBL;Acc:G4NJ01]	lactose permease	protein_coding	GO:0016021(integral component of membrane); GO:0006810(transport); GO:0055085(transmembrane transport); GO:0016020(membrane); GO:0005215(transporter activity); GO:0022857(transmembrane transporter activity)	NA	NA	NA	99.236	65.5571	64.0368	20.3918	44.7735	46.6369	56.772	0.499902	-1.00028	0.3743	-2.67241	0.00753087	0.128799	none
2679146	MGG_01368	MGG_01368T0	Putative uncharacterized protein [Source:UniProtKB/TrEMBL;Acc:G4MZ30]	uncharacterized protein	protein_coding	GO:0000166(nucleotide binding); GO:0008152(metabolic process); GO:0016491(oxidoreductase activity); GO:0055114(oxidation-reduction process)	NA	NA	NA	9.08042	16.227	6.04121	8.15673	108.736	14.7873	27.1714	4.20896	2.07346	0.776479	2.67034	0.00757747	0.129267	none
2674481	MGG_00548	MGG_00548T0; MGG_00548T1	CTR2 short splice [Source:UniProtKB/TrEMBL;Acc:G4NBG1]	CTR2 short splice; CTR2 short splice, variant	protein_coding	GO:0016021(integral component of membrane); GO:0043581(obsolete mycelium development); GO:0005375(copper ion transmembrane transporter activity); GO:0016020(membrane); GO:0035434(copper ion transmembrane transport); GO:0006811(ion transport); GO:0006878(cellular copper ion homeostasis); GO:0015677(copper ion import); GO:0015680(protein maturation by copper ion transfer); GO:0000329(fungal-type va…	NA	K14686	NA	107.019	93.4675	96.0552	138.664	185.49	138.773	126.578	1.56064	0.642134	0.240512	2.66987	0.00758812	0.129267	none
2677833	MGG_04436	MGG_04436T0	Elongation factor 1-beta [Source:UniProtKB/TrEMBL;Acc:G4MSB2]	elongation factor 1-beta	protein_coding	GO:0006412(translation); GO:0005085(guanyl-nucleotide exchange factor activity); GO:0005853(eukaryotic translation elongation factor 1 complex); GO:0006414(translational elongation); GO:0003746(translation elongation factor activity)	NA	K03232	NA	963.173	950.902	1028.21	829.947	489.31	625.616	814.527	0.659741	-0.600028	0.224923	-2.6677	0.0076372	0.129847	none
2681499	MGG_02402	MGG_02402T0	Putative uncharacterized protein [Source:UniProtKB/TrEMBL;Acc:G4MRE5]	uncharacterized protein	protein_coding	GO:0003674(molecular_function); GO:0008150(biological_process); GO:0005575(cellular_component)	NA	NA	NA	7.13462	7.78896	10.2701	10.1959	28.7829	29.5746	15.6245	2.78214	1.47619	0.553534	2.66685	0.00765653	0.129921	none
2680006	MGG_09087	NA	NA	3-oxoacyl	NA	NA	NA	K17746	ec:1.1.1.332	27.8899	28.5595	19.936	42.8228	46.3725	56.8742	37.0758	1.93304	0.950874	0.357515	2.65967	0.00782165	0.132446	none
2675485	MGG_05078	MGG_05078T0	Potassium/sodium efflux P-type ATPase [Source:UniProtKB/TrEMBL;Acc:G4N471]	potassium/sodium efflux P-type ATPase	protein_coding	GO:0046872(metal ion binding); GO:0016021(integral component of membrane); GO:0005524(ATP binding); GO:0000166(nucleotide binding); GO:0008152(metabolic process); GO:0016787(hydrolase activity); GO:0016020(membrane); GO:0003824(catalytic activity); GO:0015662(ion transmembrane transporter activity, phosphorylative mechanism); GO:0019829(ATPase-coupled cation transmembrane transporter activity); G…	NA	K01536	ec:7.2.2.3	670.654	348.556	472.422	279.368	351.792	269.584	398.729	0.603658	-0.728197	0.273855	-2.65906	0.00783598	0.132446	none
2683777	MGG_07850	NA	NA	uncharacterized protein	NA	NA	NA	NA	NA	62.9143	74.6442	87.5975	61.1755	22.3867	30.7121	56.5717	0.494781	-1.01514	0.382438	-2.65439	0.0079453	0.134032	none
2677432	MGG_03977	MGG_03977T0	Putative uncharacterized protein [Source:UniProtKB/TrEMBL;Acc:G4NGZ9]	uncharacterized protein	protein_coding	GO:0046872(metal ion binding); GO:0003676(nucleic acid binding); GO:0008270(zinc ion binding); GO:0005622(intracellular)	NA	NA	NA	27.2413	53.2245	35.039	53.0187	107.137	70.524	57.6973	2.00513	1.00369	0.378417	2.65235	0.00799345	0.134582	none
2682701	MGG_02694	MGG_02694T0	Putative uncharacterized protein [Source:UniProtKB/TrEMBL;Acc:G5EH98]	uncharacterized protein	protein_coding	GO:0003674(molecular_function); GO:0008150(biological_process); GO:0005575(cellular_component)	NA	NA	NA	4.54021	9.7362	4.83297	16.3135	17.5896	21.6122	12.4374	2.94012	1.55587	0.587527	2.64817	0.00809281	0.135676	none
2679652	MGG_01268	MGG_01268T0	Nuclear localization sequence binding protein [Source:UniProtKB/TrEMBL;Acc:G4MY43]	nuclear localization sequence binding protein	protein_coding	GO:0003676(nucleic acid binding); GO:0000166(nucleotide binding); GO:0008150(biological_process); GO:0005575(cellular_component); GO:0003723(RNA binding)	NA	K11294	NA	588.93	624.415	934.575	546.501	265.443	435.656	565.92	0.579967	-0.785958	0.296852	-2.64764	0.00810546	0.135676	none
5048766	MGG_14350	MGG_14350T0	Ribosome assembly protein RRB1 [Source:UniProtKB/TrEMBL;Acc:G4NBW4]	ribosome assembly protein RRB1	protein_coding	GO:0005634(nucleus); GO:0051082(unfolded protein binding); GO:0042254(ribosome biogenesis); GO:0005730(nucleolus); GO:0005515(protein binding)	NA	K14848	NA	105.722	84.3804	134.719	83.6065	54.3678	35.262	83.0096	0.521506	-0.939244	0.354618	-2.64861	0.00808232	0.135676	none
2681529	MGG_02432	MGG_02432T0	Leucyl-tRNA synthetase [Source:UniProtKB/TrEMBL;Acc:G4MRI0]	leucyl-tRNA synthetase	protein_coding	GO:0005737(cytoplasm); GO:0005524(ATP binding); GO:0000166(nucleotide binding); GO:0006270(DNA replication initiation); GO:0006429(leucyl-tRNA aminoacylation); GO:0004823(leucine-tRNA ligase activity); GO:0006418(tRNA aminoacylation for protein translation); GO:0004812(aminoacyl-tRNA ligase activity); GO:0002161(aminoacyl-tRNA editing activity); GO:0016874(ligase activity); GO:0006412(translation…	00970(Aminoacyl-tRNA biosynthesis)	K01869	ec:6.1.1.4	324.949	336.223	347.974	258.976	219.07	237.734	287.488	0.707941	-0.498299	0.188402	-2.64487	0.00817221	0.13653	none
2681536	MGG_02439	MGG_02439T0	Oxidoreductase [Source:UniProtKB/TrEMBL;Acc:G4MRI7]	oxidoreductase	protein_coding	GO:0003824(catalytic activity); GO:0055114(oxidation-reduction process); GO:0018580(nitronate monooxygenase activity)	NA	NA	NA	114.154	118.782	88.8057	148.86	151.91	210.435	138.824	1.60019	0.67824	0.25667	2.64246	0.00823073	0.137242	none
2679645	MGG_01261	MGG_01261T0	Trehalase [Source:UniProtKB/TrEMBL;Acc:G4MY35]	trehalase	protein_coding	GO:0004555(alpha,alpha-trehalase activity); GO:0003824(catalytic activity); GO:0005991(trehalose metabolic process); GO:0016787(hydrolase activity); GO:0008152(metabolic process); GO:0016798(hydrolase activity, acting on glycosyl bonds)	00500(Starch and sucrose metabolism)	K01194	ec:3.2.1.28	180.96	146.043	65.8492	163.135	495.706	216.122	211.302	2.22942	1.15667	0.437955	2.64107	0.00826438	0.137538	none
2676907	MGG_03529	MGG_03529T0	Integral membrane protein [Source:UniProtKB/TrEMBL;Acc:G4N7R5]	uncharacterized protein	protein_coding	GO:0005783(endoplasmic reticulum); GO:0016020(membrane); GO:0003674(molecular_function); GO:0008150(biological_process); GO:0016021(integral component of membrane)	NA	NA	NA	66.806	78.5387	38.0596	91.7632	521.291	150.148	157.768	4.16332	2.05773	0.779718	2.63907	0.00831332	0.138087	none
2678751	MGG_08455	MGG_08455T0	Putative uncharacterized protein [Source:UniProtKB/TrEMBL;Acc:G4NA86]	uncharacterized protein	protein_coding	GO:0046872(metal ion binding); GO:0008152(metabolic process); GO:0016491(oxidoreductase activity); GO:0055114(oxidation-reduction process); GO:0005575(cellular_component)	00350(Tyrosine metabolism)	K00505	ec:1.14.18.1	198.472	236.914	85.181	73.4106	111.934	72.799	129.785	0.495894	-1.0119	0.383605	-2.63786	0.00834309	0.138316	none
12987313	MGG_15606	MGG_15606T0	Putative uncharacterized protein [Source:UniProtKB/TrEMBL;Acc:G4MVL5]	uncharacterized protein	protein_coding	GO:0046872(metal ion binding); GO:0006777(Mo-molybdopterin cofactor biosynthetic process); GO:0003824(catalytic activity); GO:0051539(4 iron, 4 sulfur cluster binding); GO:0051536(iron-sulfur cluster binding); GO:0019008(molybdopterin synthase complex); GO:0005739(mitochondrion); GO:0016829(lyase activity); GO:0061798(GTP 3',8'-cyclase activity)	00790(Folate biosynthesis); 01240(Biosynthesis of cofactors); 04122(Sulfur relay system)	K03639	ec:4.1.99.22	62.2657	61.6626	70.6821	144.782	105.537	83.0364	87.9944	1.6915	0.758299	0.287908	2.63382	0.00844301	0.139615	none
2681514	MGG_02417	MGG_02417T0	ATP-dependent rRNA helicase spb-4 [Source:UniProtKB/TrEMBL;Acc:G4MRG4]	ATP-dependent rRNA helicase spb-4	protein_coding	GO:0003676(nucleic acid binding); GO:0005524(ATP binding); GO:0004386(helicase activity); GO:0003723(RNA binding); GO:0008026(GO_0008026); GO:0000166(nucleotide binding); GO:0016787(hydrolase activity); GO:0005730(nucleolus); GO:0006364(rRNA processing); GO:0042254(ribosome biogenesis); GO:0003724(RNA helicase activity)	NA	K14809	ec:3.6.4.13	70.049	61.0135	73.7027	48.9404	19.1886	38.6745	51.9281	0.517	-0.951764	0.361421	-2.63339	0.00845369	0.139615	none
2684037	MGG_05938	MGG_05938T0	2,2-dialkylglycine decarboxylase [Source:UniProtKB/TrEMBL;Acc:G4N497]	2,2-dialkylglycine decarboxylase	protein_coding	GO:0008152(metabolic process); GO:0030170(pyridoxal phosphate binding); GO:0003824(catalytic activity); GO:0008483(transaminase activity); GO:0016740(transferase activity)	NA	NA	NA	29.8357	51.2773	29.6019	91.7632	83.1507	47.7743	55.5672	1.98923	0.992211	0.376874	2.63274	0.00846988	0.139616	none
2682101	MGG_10468	MGG_10468T0	Putative uncharacterized protein [Source:UniProtKB/TrEMBL;Acc:G4MYE4]	uncharacterized protein	protein_coding	NA	NA	NA	NA	23.3497	22.0687	23.5607	42.8228	30.382	67.1116	34.8826	2.06453	1.04581	0.397711	2.62958	0.00854916	0.139857	none
2683239	MGG_07117	NA	NA	NADPH-cytochrome P450 reductase, variant; NADPH-cytochrome P450 reductase	NA	NA	NA	K00327	ec:1.6.2.4	521.476	479.021	367.909	450.659	953.035	948.662	620.127	1.72242	0.784441	0.298306	2.62965	0.00854728	0.139857	none
5050215	MGG_12847	MGG_12847T0	Putative uncharacterized protein [Source:UniProtKB/TrEMBL;Acc:G4N7T9]	uncharacterized protein	protein_coding	NA	NA	NA	NA	2797.42	2471.05	2580.8	2222.71	1327.21	1694.85	2182.34	0.667714	-0.582699	0.221484	-2.63089	0.0085162	0.139857	none
2680574	MGG_09667	MGG_09667T0	Putative uncharacterized protein [Source:UniProtKB/TrEMBL;Acc:G5EHV9]	uncharacterized protein	protein_coding	GO:0003674(molecular_function); GO:0008150(biological_process); GO:0005575(cellular_component); GO:0016020(membrane); GO:0016021(integral component of membrane)	NA	NA	NA	66.806	62.9607	50.7461	34.6661	27.1839	35.262	46.2708	0.539382	-0.89062	0.338581	-2.63045	0.00852723	0.139857	none
5051124	MGG_11149	NA	NA	uncharacterized protein	NA	NA	NA	NA	NA	313.923	307.015	354.619	207.997	171.099	262.759	269.568	0.660978	-0.597326	0.227408	-2.62667	0.0086226	0.140792	none
2677435	MGG_04209	MGG_04209T0	Putative uncharacterized protein [Source:UniProtKB/TrEMBL;Acc:G4NF88]	uncharacterized protein	protein_coding	GO:0016020(membrane); GO:0016021(integral component of membrane)	NA	NA	NA	137.504	212.898	135.927	152.939	422.15	349.208	235.104	1.90716	0.931427	0.355169	2.62249	0.00872905	0.142262	none
2680317	MGG_09337	NA	NA	uncharacterized protein	NA	NA	NA	NA	NA	321.706	255.737	276.687	228.388	153.509	183.135	236.527	0.658663	-0.602388	0.230131	-2.61759	0.00885536	0.144049	none
2675015	MGG_00684	MGG_00684T0	Putative uncharacterized protein [Source:UniProtKB/TrEMBL;Acc:G4NAX9]	uncharacterized protein	protein_coding	NA	NA	NA	NA	34.3759	46.0847	33.8308	46.9012	177.495	50.0493	64.7894	2.40156	1.26397	0.483054	2.61662	0.00888044	0.144101	none
2679400	MGG_01542	MGG_01542T0	Glycosyl hydrolase family 10 [Source:UniProtKB/TrEMBL;Acc:G4MTF8]	glycosyl hydrolase family 10	protein_coding	GO:0005975(carbohydrate metabolic process); GO:0008152(metabolic process); GO:0016787(hydrolase activity); GO:0003824(catalytic activity); GO:0004553(hydrolase activity, hydrolyzing O-glycosyl compounds); GO:0043169(cation binding); GO:0016798(hydrolase activity, acting on glycosyl bonds)	NA	K01181	ec:3.2.1.8	40.8619	54.5227	134.719	4.07836	0	18.1997	42.0636	0.099773	-3.32521	1.27101	-2.61619	0.00889181	0.144101	none
5049610	MGG_14742	NA	NA	tRNA(His) guanylyltransferase	NA	NA	NA	K10761	ec:2.7.7.79	49.2937	52.5755	72.4945	30.5877	23.9858	35.262	44.0332	0.518924	-0.946405	0.362205	-2.6129	0.0089778	0.145222	none
2674414	MGG_00056	MGG_00056T0	Short-chain dehydrogenase/reductase SDR [Source:UniProtKB/TrEMBL;Acc:G4NES9]	short-chain dehydrogenase/reductase SDR	protein_coding	GO:0000166(nucleotide binding); GO:0008152(metabolic process); GO:0016491(oxidoreductase activity); GO:0055114(oxidation-reduction process); GO:0005575(cellular_component)	NA	NA	NA	21.4039	22.0687	18.1236	44.862	35.1792	40.9494	30.4311	1.96034	0.971104	0.371923	2.61103	0.00902691	0.145382	none
2675049	MGG_00081	MGG_00081T0	Putative uncharacterized protein [Source:UniProtKB/TrEMBL;Acc:G4NEQ0]	uncharacterized protein	protein_coding	GO:0052051(obsolete interaction with host via protein secreted by type II secretion system); GO:0003674(molecular_function); GO:0005575(cellular_component)	NA	NA	NA	311.329	191.479	243.461	452.698	380.574	334.42	318.994	1.56062	0.642117	0.245964	2.61061	0.00903809	0.145382	none
2683533	MGG_07613	MGG_07613T0	Acetyl-CoA carboxylase [Source:UniProtKB/TrEMBL;Acc:G4N2L8]	acetyl-CoA carboxylase	protein_coding	GO:0046872(metal ion binding); GO:0005789(endoplasmic reticulum membrane); GO:0005739(mitochondrion); GO:0005524(ATP binding); GO:0008152(metabolic process); GO:0003824(catalytic activity); GO:0006606(protein import into nucleus); GO:0016874(ligase activity); GO:0006633(fatty acid biosynthetic process); GO:0003989(acetyl-CoA carboxylase activity); GO:0004075(biotin carboxylase activity); GO:00055…	00061(Fatty acid biosynthesis); 00620(Pyruvate metabolism); 00640(Propanoate metabolism); 01212(Fatty acid metabolism)	K11262	ec:6.4.1.2	173.177	253.79	224.129	136.625	134.32	150.148	178.698	0.648234	-0.625414	0.239533	-2.61098	0.00902842	0.145382	none
2680967	MGG_10010	NA	NA	uncharacterized protein	NA	NA	NA	NA	NA	39.5647	42.8393	73.0986	138.664	76.7545	84.1738	75.8492	1.90763	0.931778	0.357238	2.60828	0.00909975	0.146102	none
2674218	MGG_00438	MGG_00438T0	Putative uncharacterized protein [Source:UniProtKB/TrEMBL;Acc:G4NC43]	uncharacterized protein	protein_coding	GO:0016020(membrane); GO:0016021(integral component of membrane)	NA	NA	NA	60.9685	64.908	50.7461	85.6457	119.929	87.5863	78.2973	1.66076	0.731846	0.280754	2.60671	0.0091416	0.146503	none
2674380	MGG_01041	MGG_01041T0	Cellulose signaling associated protein ENVOY [Source:UniProtKB/TrEMBL;Acc:G4NCS4]	cellulose signaling associated protein ENVOY	protein_coding	GO:0043581(obsolete mycelium development); GO:0004871(obsolete signal transducer activity); GO:0007165(signal transduction); GO:0005575(cellular_component)	NA	NA	NA	177.068	255.088	214.463	6.11755	7.99526	78.4864	123.203	0.145135	-2.78453	1.06857	-2.60586	0.00916441	0.146597	none
2677277	MGG_04007	MGG_04007T0	Putative uncharacterized protein [Source:UniProtKB/TrEMBL;Acc:G4NGW6]	uncharacterized protein	protein_coding	NA	NA	K17439	NA	127.126	116.834	119.616	91.7632	57.5659	77.3489	98.3757	0.620055	-0.689531	0.264677	-2.60518	0.00918258	0.146616	none
2677981	MGG_04595	MGG_04595T0; MGG_04595T1	Putative uncharacterized protein [Source:UniProtKB/TrEMBL;Acc:G4MRS0]	uncharacterized protein; hypothetical protein, variant	protein_coding	GO:0003674(molecular_function); GO:0008150(biological_process); GO:0005575(cellular_component);	NA	NA	NA	20.1066	18.8233	20.5401	46.9012	49.5706	27.2996	30.5403	2.04792	1.03416	0.397195	2.60367	0.00922328	0.146725	none
2683178	MGG_07195	MGG_07195T0	O-acetylhomoserine (Thiol)-lyase [Source:UniProtKB/TrEMBL;Acc:G4MTN6]	O-acetylhomoserine (thiol)-lyase	protein_coding	GO:0005737(cytoplasm); GO:0030170(pyridoxal phosphate binding); GO:0003824(catalytic activity); GO:0006555(methionine metabolic process); GO:0016765(transferase activity, transferring alkyl or aryl (other than methyl) groups); GO:0006520(cellular amino acid metabolic process); GO:0016829(lyase activity); GO:0005575(cellular_component); GO:0019346(transsulfuration)	00270(Cysteine and methionine metabolism); 00920(Sulfur metabolism); 01230(Biosynthesis of amino acids)	K17069	ec:2.5.1.49	75.2378	81.784	71.2862	101.959	143.915	114.886	98.178	1.58411	0.663676	0.254854	2.60414	0.00921044	0.146725	none
2683484	MGG_13420	MGG_13420T0	Putative uncharacterized protein [Source:UniProtKB/TrEMBL;Acc:G4N256]	uncharacterized protein	protein_coding	GO:0003674(molecular_function); GO:0008150(biological_process); GO:0005575(cellular_component)	NA	NA	NA	2.59441	1.94724	0.604121	12.2351	7.99526	6.82491	5.36684	5.19675	2.37761	0.914604	2.59961	0.00933308	0.147584	none
2683144	MGG_07161	MGG_07161T0	Kinase isozyme 4 [Source:UniProtKB/TrEMBL;Acc:G4MTJ4]	kinase isozyme 4	protein_coding	GO:0005524(ATP binding); GO:0007165(signal transduction); GO:0016772(transferase activity, transferring phosphorus-containing groups); GO:0004673(protein histidine kinase activity); GO:0016301(kinase activity); GO:0000155(phosphorelay sensor kinase activity); GO:0016310(phosphorylation); GO:0000160(phosphorelay signal transduction system); GO:0000166(nucleotide binding); GO:0016740(transferase ac…	NA	K00898	ec:2.7.11.2	92.75	112.94	79.1398	128.468	179.094	145.598	122.998	1.59497	0.673531	0.259173	2.59877	0.00935583	0.147584	none
2684027	MGG_05948	MGG_05948T0	Zinc knuckle domain-containing protein [Source:UniProtKB/TrEMBL;Acc:G4N4A8]	zinc knuckle domain-containing protein	protein_coding	GO:0046872(metal ion binding); GO:0003676(nucleic acid binding); GO:0008270(zinc ion binding); GO:0008150(biological_process); GO:0005575(cellular_component)	NA	K09250	NA	732.92	819.788	923.096	668.852	455.73	571.017	695.234	0.683917	-0.548107	0.210785	-2.60031	0.00931395	0.147584	none
2676630	MGG_03645	MGG_03645T0	Adenylosuccinate lyase [Source:UniProtKB/TrEMBL;Acc:G4N712]	adenylosuccinate lyase	protein_coding	GO:0044208('de novo' AMP biosynthetic process); GO:0003824(catalytic activity); GO:0070626((S)-2-(5-amino-1-(5-phospho-D-ribosyl)imidazole-4-carboxamido)succinate AMP-lyase (fumarate-forming) activity); GO:0006189('de novo' IMP biosynthetic process); GO:0004018(N6-(1,2-dicarboxyethyl)AMP AMP-lyase (fumarate-forming) activity); GO:0016829(lyase activity); GO:0005575(cellular_component); GO:0006164…	00230(Purine metabolism); 00250(Alanine, aspartate and glutamate metabolism); 01240(Biosynthesis of cofactors)	K01756	ec:4.3.2.2	151.773	119.431	168.55	108.077	43.1744	90.9987	113.667	0.548755	-0.865765	0.333176	-2.59852	0.00936258	0.147584	none
2682696	MGG_02689	MGG_02689T0	D-arabinono-1,4-lactone oxidase [Source:UniProtKB/TrEMBL;Acc:G5EH52]	D-arabinono-1,4-lactone oxidase	protein_coding	GO:0050660(flavin adenine dinucleotide binding); GO:0016020(membrane); GO:0003824(catalytic activity); GO:0016491(oxidoreductase activity); GO:0055114(oxidation-reduction process); GO:0003885(D-arabinono-1,4-lactone oxidase activity); GO:0009058(biosynthetic process); GO:0016614(oxidoreductase activity, acting on CH-OH group of donors); GO:0008762(UDP-N-acetylmuramate dehydrogenase activity); GO:…	00053(Ascorbate and aldarate metabolism)	K00107	ec:1.1.3.37	50.5909	67.5043	59.8079	38.7445	23.9858	32.987	45.6034	0.534623	-0.903407	0.347427	-2.60028	0.00931473	0.147584	none
5051419	MGG_14061	NA	NA	oxalate decarboxylase oxdD	NA	NA	NA	NA	NA	40.8619	25.9632	50.142	120.312	57.5659	61.4242	59.3781	2.01877	1.01348	0.390397	2.59601	0.00943121	0.148396	none
2679143	MGG_01365	MGG_01365T0	FAD binding domain-containing protein [Source:UniProtKB/TrEMBL;Acc:G4MZ23]	FAD binding domain-containing protein	protein_coding	GO:0005575(cellular_component); GO:0016491(oxidoreductase activity); GO:0055114(oxidation-reduction process); GO:0004497(monooxygenase activity)	NA	NA	NA	0.648602	0	3.0206	24.4702	7.99526	1.13748	6.21202	8.72766	3.1256	1.20477	2.59436	0.00947684	0.148843	none
2677291	MGG_04032	MGG_04032T0	Putative uncharacterized protein [Source:UniProtKB/TrEMBL;Acc:G4NGT5]	uncharacterized protein	protein_coding	GO:0003674(molecular_function); GO:0008150(biological_process); GO:0005575(cellular_component); GO:0005634(nucleus); GO:0005737(cytoplasm)	NA	NA	NA	22.7011	23.3669	29.6019	10.1959	9.59431	10.2374	17.6162	0.396785	-1.33357	0.514387	-2.59254	0.00952701	0.14936	none
5048987	MGG_13765	MGG_13765T0	Putative uncharacterized protein [Source:UniProtKB/TrEMBL;Acc:G4MQU4]	uncharacterized protein	protein_coding	GO:0006508(proteolysis); GO:0008236(serine-type peptidase activity); GO:0016787(hydrolase activity)	NA	NA	NA	122.586	193.426	91.8263	185.566	350.192	212.71	192.718	1.83721	0.877514	0.339291	2.58632	0.00970072	0.149644	none
2684025	MGG_13246	MGG_13246T0	Amine oxidase [Source:UniProtKB/TrEMBL;Acc:G4N4B0]	amine oxidase	protein_coding	GO:0016491(oxidoreductase activity); GO:0055114(oxidation-reduction process)	NA	NA	NA	46.0507	44.1374	47.1214	63.2147	118.33	65.9741	64.138	1.80214	0.849712	0.32831	2.58814	0.00964967	0.149644	none
2677868	MGG_04764	MGG_04764T0	Cystathionine gamma-synthase [Source:UniProtKB/TrEMBL;Acc:G4MTS3]	cystathionine gamma-synthase	protein_coding	GO:0030170(pyridoxal phosphate binding); GO:0003824(catalytic activity); GO:0006520(cellular amino acid metabolic process); GO:0003674(molecular_function); GO:0005575(cellular_component); GO:0019346(transsulfuration)	00270(Cysteine and methionine metabolism); 00450(Selenocompound metabolism); 00920(Sulfur metabolism); 01230(Biosynthesis of amino acids)	K01739	ec:2.5.1.48	118.045	147.341	108.138	177.409	230.264	171.76	158.826	1.55067	0.632887	0.244269	2.59094	0.00957142	0.149644	none
12986701	MGG_15901	MGG_15901T0	Putative uncharacterized protein [Source:UniProtKB/TrEMBL;Acc:G4MV05]	uncharacterized protein	protein_coding	GO:0008270(zinc ion binding); GO:0005622(intracellular); GO:0044271(cellular nitrogen compound biosynthetic process); GO:0003700(DNA-binding transcription factor activity); GO:0008150(biological_process); GO:0006355(regulation of transcription, DNA-templated); GO:0003676(nucleic acid binding)	NA	NA	NA	343.11	402.429	398.72	420.072	615.635	691.59	478.593	1.51417	0.598531	0.231242	2.58833	0.00964436	0.149644	none
2684087	MGG_05888	MGG_05888T0	Putative uncharacterized protein [Source:UniProtKB/TrEMBL;Acc:G4N3Y5]	uncharacterized protein	protein_coding	GO:0008270(zinc ion binding); GO:0009086(methionine biosynthetic process); GO:0003871(5-methyltetrahydropteroyltriglutamate-homocysteine S-methyltransferase activity); GO:0005575(cellular_component)	NA	NA	NA	282.79	259.632	254.939	450.659	354.99	341.245	324.043	1.43313	0.519167	0.200602	2.58805	0.00965208	0.149644	none
2674470	MGG_00922	MGG_00922T0	Vacuolar protease A [Source:UniProtKB/TrEMBL;Acc:G4NDG4]	vacuolar protease A	protein_coding	GO:0006508(proteolysis); GO:0016787(hydrolase activity); GO:0008233(peptidase activity); GO:0004190(aspartic-type endopeptidase activity); GO:0005575(cellular_component)	04138(Autophagy - yeast)	K01381	ec:3.4.23.25	930.095	967.129	808.313	1148.06	1471.13	1169.33	1082.34	1.40045	0.48589	0.187664	2.58915	0.00962143	0.149644	none
2674990	MGG_00341	MGG_00341T0	Eukaryotic translation initiation factor 3 subunit D [Source:UniProtKB/Swiss-Prot;Acc:A4RFH6]	eukaryotic translation initiation factor 3 subunit D	protein_coding	GO:0043581(obsolete mycelium development); GO:0001731(formation of translation preinitiation complex); GO:0006446(regulation of translational initiation); GO:0005852(eukaryotic translation initiation factor 3 complex); GO:0003743(translation initiation factor activity); GO:0033290(eukaryotic 48S preinitiation complex); GO:0016282(eukaryotic 43S preinitiation complex); GO:0005575(cellular_componen…	NA	K03251	NA	483.208	447.865	497.795	381.327	244.655	341.245	399.349	0.675933	-0.565048	0.218285	-2.58858	0.00963728	0.149644	none
5050279	MGG_13347	NA	NA	uncharacterized protein	NA	NA	NA	NA	NA	271.764	129.816	153.447	81.5673	137.519	73.9365	141.341	0.52714	-0.923742	0.357067	-2.58703	0.00968075	0.149644	none
2679229	MGG_01402	MGG_01402T0	BNR/Asp-box repeat domain-containing protein [Source:UniProtKB/TrEMBL;Acc:G4MZI1]	BNR/Asp-box repeat domain-containing protein	protein_coding	GO:0008150(biological_process); GO:0005575(cellular_component)	NA	NA	NA	15.5664	11.0344	19.936	2.03918	1.59905	6.82491	9.49999	0.245506	-2.02617	0.783343	-2.58656	0.0096938	0.149644	none
2675680	MGG_05123	MGG_05123T0	Putative uncharacterized protein [Source:UniProtKB/TrEMBL;Acc:G4N4H6]	uncharacterized protein	protein_coding	GO:0044271(cellular nitrogen compound biosynthetic process); GO:0003674(molecular_function); GO:0005575(cellular_component); GO:0016020(membrane); GO:0016021(integral component of membrane)	NA	NA	NA	31.1329	50.6282	42.8926	61.1755	73.5564	85.3113	57.4495	1.78014	0.831993	0.321876	2.58483	0.00974282	0.149805	none
2680606	MGG_09601	MGG_09601T0	Alpha-xylosidase [Source:UniProtKB/TrEMBL;Acc:G5EH41]	alpha-xylosidase	protein_coding	GO:0005975(carbohydrate metabolic process); GO:0003824(catalytic activity); GO:0030246(carbohydrate binding); GO:0004553(hydrolase activity, hydrolyzing O-glycosyl compounds); GO:0005575(cellular_component); GO:0016787(hydrolase activity); GO:0008152(metabolic process); GO:0016798(hydrolase activity, acting on glycosyl bonds)	NA	K01811	ec:3.2.1.177	171.879	203.162	176.403	138.664	127.924	87.5863	150.937	0.635209	-0.654696	0.253295	-2.58472	0.00974582	0.149805	none
5050770	MGG_11610	NA	NA	uncharacterized protein	NA	NA	NA	NA	NA	1161.65	967.778	1279.53	2049.38	1365.59	1614.09	1406.34	1.47419	0.559925	0.21681	2.58256	0.00980695	0.150477	none
2680643	MGG_09629	NA	NA	uncharacterized protein	NA	NA	NA	NA	NA	9.08042	14.2798	24.1648	38.7445	27.1839	44.3619	26.3025	2.32388	1.21654	0.471861	2.57817	0.00993262	0.152136	none
12985150	MGG_15133	NA	NA	sulfate permease 2	NA	NA	NA	K14708	NA	4.54021	7.78896	8.45769	12.2351	55.9668	7.96239	16.1585	3.6444	1.86568	0.724958	2.5735	0.0100674	0.153117	none
2681262	MGG_02139	MGG_02139T0	Putative uncharacterized protein [Source:UniProtKB/TrEMBL;Acc:G4MNT8]	uncharacterized protein	protein_coding	GO:0003674(molecular_function); GO:0008150(biological_process); GO:0005575(cellular_component)	NA	NA	NA	17.5122	35.6994	24.7689	26.5094	89.5469	59.1492	42.1977	2.26671	1.1806	0.458725	2.57365	0.0100632	0.153117	none
2678305	MGG_08189	NA	NA	aromatic amino acid aminotransferase	NA	NA	NA	NA	NA	32.4301	47.3828	32.6225	48.9404	115.132	59.1492	55.9428	1.98977	0.992601	0.385591	2.57423	0.0100462	0.153117	none
2675557	MGG_04934	MGG_04934T0	Peptide transporter PTR2-A [Source:UniProtKB/TrEMBL;Acc:G4N363]	peptide transporter PTR2-A	protein_coding	GO:0016021(integral component of membrane); GO:0006810(transport); GO:0016020(membrane); GO:0005215(transporter activity); GO:0006857(oligopeptide transport); GO:0055085(transmembrane transport); GO:0022857(transmembrane transporter activity)	NA	K03305	NA	179.663	216.144	101.492	69.3322	78.3536	118.298	127.214	0.540541	-0.887525	0.344797	-2.57405	0.0100516	0.153117	none
2674397	MGG_00984	MGG_00984T0	ZZ type zinc finger domain-containing protein [Source:UniProtKB/TrEMBL;Acc:G4ND39]	ZZ type zinc finger domain-containing protein	protein_coding	GO:0008270(zinc ion binding); GO:0008150(biological_process); GO:0005575(cellular_component); GO:0046872(metal ion binding)	NA	K17987	NA	524.07	510.177	386.637	595.441	943.441	646.091	600.976	1.5384	0.621433	0.242033	2.56756	0.0102418	0.155496	none
2677020	MGG_03287	MGG_03287T0	Alpha-amylase [Source:UniProtKB/TrEMBL;Acc:G4N9G3]	alpha-amylase	protein_coding	GO:0005975(carbohydrate metabolic process); GO:0005509(calcium ion binding); GO:0003824(catalytic activity); GO:0004553(hydrolase activity, hydrolyzing O-glycosyl compounds); GO:0043169(cation binding); GO:0005575(cellular_component); GO:0016787(hydrolase activity); GO:0008152(metabolic process); GO:0016798(hydrolase activity, acting on glycosyl bonds)	00500(Starch and sucrose metabolism)	K01176	ec:3.2.1.1	21.4039	16.8761	7.24945	2.03918	1.59905	5.68742	9.1425	0.221147	-2.17693	0.848071	-2.56691	0.0102608	0.155511	none
2684377	MGG_06222	MGG_06222T0	CobW domain-containing protein [Source:UniProtKB/TrEMBL;Acc:G4N8Q3]	cobW domain-containing protein	protein_coding	NA	NA	NA	NA	3.89161	11.6834	23.5607	106.037	9.59431	32.987	31.2924	3.74621	1.90543	0.743771	2.56185	0.0104115	0.156698	none
5049527	MGG_11737	NA	NA	uncharacterized protein	NA	NA	NA	NA	NA	121.288	122.676	79.1398	136.625	287.829	155.835	150.566	1.79812	0.84649	0.330418	2.56187	0.0104109	0.156698	none
12984635	MGG_15682	NA	NA	uncharacterized protein	NA	NA	NA	NA	NA	19.458	15.5779	21.7483	0	11.1934	4.54994	12.0879	0.287375	-1.79899	0.702099	-2.56231	0.010398	0.156698	none
2685007	MGG_06834	MGG_06834T0	1,4-beta-D-glucan cellobiohydrolase B [Source:UniProtKB/TrEMBL;Acc:G4MMG0]	1,4-beta-D-glucan cellobiohydrolase B	protein_coding	GO:0005975(carbohydrate metabolic process); GO:0052051(obsolete interaction with host via protein secreted by type II secretion system); GO:0016787(hydrolase activity); GO:0004553(hydrolase activity, hydrolyzing O-glycosyl compounds); GO:0030245(cellulose catabolic process); GO:0008152(metabolic process); GO:0016798(hydrolase activity, acting on glycosyl bonds); GO:0000272(polysaccharide cataboli…	00500(Starch and sucrose metabolism)	K01225	ec:3.2.1.91	33.0787	47.3828	109.95	0	4.79716	18.1997	35.5681	0.125828	-2.99047	1.16703	-2.56246	0.0103933	0.156698	none
2682744	MGG_02574	MGG_02574T0	Putative uncharacterized protein [Source:UniProtKB/TrEMBL;Acc:G5EGX8]	uncharacterized protein	protein_coding	GO:0043581(obsolete mycelium development); GO:0016740(transferase activity); GO:0016757(transferase activity, transferring glycosyl groups); GO:0003674(molecular_function); GO:0005575(cellular_component); GO:0016020(membrane); GO:0016021(integral component of membrane)	NA	NA	NA	247.117	341.416	203.589	222.271	831.507	539.168	397.511	2.01415	1.01017	0.394451	2.56095	0.0104386	0.156815	none
2680845	MGG_09846	NA	NA	TPR repeat-containing protein	NA	NA	NA	K24935	NA	72.6434	72.6969	96.0552	55.0579	51.1697	29.5746	62.8663	0.550676	-0.860725	0.33617	-2.56039	0.0104556	0.156815	none
12984034	MGG_17365	MGG_17365T0	Putative uncharacterized protein [Source:UniProtKB/TrEMBL;Acc:G4NEC3]	uncharacterized protein	protein_coding	GO:0005515(protein binding)	NA	NA	NA	42.8077	40.892	37.4555	63.2147	79.9526	62.5616	54.4807	1.6972	0.763155	0.298579	2.55596	0.0105896	0.158552	none
2680365	MGG_09400	NA	NA	uncharacterized protein	NA	NA	NA	K03574	ec:3.6.1.55	41.5105	29.8577	22.3525	48.9404	75.1555	54.5992	45.4026	1.91277	0.935664	0.366337	2.55411	0.0106461	0.159121	none
5050377	MGG_13455	MGG_13455T0	Putative uncharacterized protein [Source:UniProtKB/TrEMBL;Acc:G4N3E1]	uncharacterized protein	protein_coding	GO:0003824(catalytic activity); GO:0016052(carbohydrate catabolic process); GO:0008496(mannan endo-1,6-alpha-mannosidase activity); GO:0016020(membrane); GO:0016021(integral component of membrane); GO:0016787(hydrolase activity); GO:0008152(metabolic process); GO:0016798(hydrolase activity, acting on glycosyl bonds)	NA	K08257	ec:3.2.1.101	11.6748	10.3853	17.5195	59.1363	19.1886	23.8872	23.6319	2.51857	1.3326	0.521973	2.55302	0.0106795	0.159345	none
2680133	MGG_09010	MGG_09010T0	Transcriptional activator hac1 [Source:UniProtKB/TrEMBL;Acc:G5EI02]	transcriptional activator hac1	protein_coding	GO:0003677(DNA binding); GO:0043581(obsolete mycelium development); GO:0005634(nucleus); GO:0006355(regulation of transcription, DNA-templated); GO:0043565(sequence-specific DNA binding); GO:0003700(DNA-binding transcription factor activity)	NA	K16230	NA	607.74	701.655	653.054	970.651	877.88	816.714	771.282	1.3563	0.43968	0.172329	2.55139	0.0107294	0.159815	none
2681171	MGG_01956	MGG_01956T0	Putative uncharacterized protein [Source:UniProtKB/TrEMBL;Acc:G4NFZ4]	uncharacterized protein	protein_coding	GO:0003674(molecular_function); GO:0008150(biological_process); GO:0005575(cellular_component)	NA	NA	NA	370.351	329.733	431.946	595.441	463.725	565.33	459.421	1.43412	0.520165	0.203936	2.55062	0.010753	0.159892	none
2677125	MGG_04201	MGG_04201T0	U3 small nucleolar ribonucleoprotein imp3 [Source:UniProtKB/TrEMBL;Acc:G4NF51]	U3 small nucleolar ribonucleoprotein imp3	protein_coding	GO:0003676(nucleic acid binding); GO:0003723(RNA binding); GO:0030529(GO_0030529); GO:0019843(rRNA binding); GO:0005622(intracellular); GO:0019013(viral nucleocapsid)	03008(Ribosome biogenesis in eukaryotes)	K14560	NA	86.264	77.8896	80.3481	59.1363	44.7735	44.3619	65.4622	0.599153	-0.739004	0.289849	-2.54961	0.0107843	0.160081	none
12984210	MGG_16721	NA	NA	uncharacterized protein	NA	NA	NA	NA	NA	180.96	154.481	123.845	69.3322	119.929	86.4488	122.499	0.602844	-0.730144	0.286529	-2.54823	0.010827	0.160439	none
2678362	MGG_08158	NA	NA	uncharacterized protein	NA	NA	NA	NA	NA	289.925	432.936	492.962	789.164	518.093	621.066	524.024	1.58386	0.66344	0.260674	2.5451	0.0109246	0.16161	none
2677015	MGG_03301	MGG_03301T0	Putative uncharacterized protein [Source:UniProtKB/TrEMBL;Acc:G4N9F1]	uncharacterized protein	protein_coding	GO:0008080(N-acetyltransferase activity); GO:0008150(biological_process); GO:0005575(cellular_component)	NA	NA	NA	349.596	383.606	364.889	493.482	845.899	431.107	478.096	1.61139	0.688309	0.270587	2.54376	0.0109667	0.161679	none
2676426	MGG_03551	MGG_03551T0	Threonyl-tRNA synthetase [Source:UniProtKB/TrEMBL;Acc:G4N7P0]	threonyl-tRNA synthetase	protein_coding	GO:0005737(cytoplasm); GO:0005524(ATP binding); GO:0000166(nucleotide binding); GO:0004829(threonine-tRNA ligase activity); GO:0006418(tRNA aminoacylation for protein translation); GO:0004812(aminoacyl-tRNA ligase activity); GO:0006435(threonyl-tRNA aminoacylation); GO:0016876(GO_0016876); GO:0043039(tRNA aminoacylation); GO:0005575(cellular_component); GO:0016874(ligase activity)	00970(Aminoacyl-tRNA biosynthesis)	K01868	ec:6.1.1.3	280.844	251.194	281.52	197.801	207.877	154.698	228.989	0.685042	-0.545737	0.21449	-2.54435	0.0109482	0.161679	none
2675364	MGG_05153	MGG_05153T0	Putative uncharacterized protein [Source:UniProtKB/TrEMBL;Acc:G4N4R4]	uncharacterized protein	protein_coding	GO:0008270(zinc ion binding); GO:0005634(nucleus); GO:0006355(regulation of transcription, DNA-templated); GO:0003700(DNA-binding transcription factor activity); GO:0000981(DNA-binding transcription factor activity, RNA polymerase II-specific); GO:0006357(regulation of transcription by RNA polymerase II); GO:0042025(host cell nucleus)	NA	K21632	NA	126.477	122.027	105.117	36.7053	65.5611	92.1362	91.3373	0.562223	-0.830786	0.326774	-2.54239	0.0110097	0.162038	none
2682024	MGG_10412	MGG_10412T0	Allantoinase [Source:UniProtKB/TrEMBL;Acc:G4NGA5]	allantoinase	protein_coding	GO:0046872(metal ion binding); GO:0016787(hydrolase activity); GO:0016888(endodeoxyribonuclease activity, producing 5'-phosphomonoesters); GO:0044271(cellular nitrogen compound biosynthetic process); GO:0009442(allantoin assimilation pathway); GO:0016810(hydrolase activity, acting on carbon-nitrogen (but not peptide) bonds); GO:0016812(hydrolase activity, acting on carbon-nitrogen (but not peptid…	00230(Purine metabolism)	K01466	ec:3.5.2.5	30.4843	59.0663	45.3091	91.7632	76.7545	73.9365	62.8856	1.78888	0.839053	0.330274	2.54048	0.0110702	0.162402	none
2674932	MGG_00447	MGG_00447T0	Brefeldin A resistance protein [Source:UniProtKB/TrEMBL;Acc:G4NC33]	brefeldin A resistance protein	protein_coding	GO:0016021(integral component of membrane); GO:0005524(ATP binding); GO:0006200(obsolete ATP catabolic process); GO:0000166(nucleotide binding); GO:0006810(transport); GO:0016020(membrane); GO:0016887(ATPase activity); GO:0017111(nucleoside-triphosphatase activity); GO:0042626(ATPase-coupled transmembrane transporter activity); GO:0055085(transmembrane transport)	NA	NA	NA	788.699	776.948	852.414	840.143	2152.32	1184.12	1099.11	1.72784	0.788969	0.310567	2.54042	0.011072	0.162402	none
2684733	MGG_06578	MGG_06578T0	Putative uncharacterized protein [Source:UniProtKB/TrEMBL;Acc:G4N6B6]	uncharacterized protein	protein_coding	GO:0003674(molecular_function); GO:0008150(biological_process); GO:0005575(cellular_component)	NA	NA	NA	36.3217	30.5067	42.8926	89.724	67.1602	47.7743	52.3966	1.83485	0.87566	0.344812	2.53953	0.0111002	0.16254	none
12986826	MGG_15344	NA	NA	uncharacterized protein	NA	NA	NA	NA	NA	126.477	98.6601	128.678	97.8808	52.7687	60.2867	94.1252	0.58728	-0.76788	0.302687	-2.53688	0.0111845	0.163498	none
2679395	MGG_01537	MGG_01537T0	PyrABCN [Source:UniProtKB/TrEMBL;Acc:G4MTF2]	pyrABCN	protein_coding	GO:0046872(metal ion binding); GO:0005524(ATP binding); GO:0008152(metabolic process); GO:0003824(catalytic activity); GO:0006207('de novo' pyrimidine nucleobase biosynthetic process); GO:0006807(nitrogen compound metabolic process); GO:0016874(ligase activity); GO:0004070(aspartate carbamoyltransferase activity); GO:0006520(cellular amino acid metabolic process); GO:0016810(hydrolase activity, a…	00240(Pyrimidine metabolism); 00250(Alanine, aspartate and glutamate metabolism); 01240(Biosynthesis of cofactors)	K11541	ec:6.3.5.5	312.626	299.226	431.946	287.525	155.108	202.472	281.484	0.615074	-0.701169	0.276457	-2.53626	0.0112042	0.16351	none
2680512	MGG_09469	MGG_09469T0	Putative uncharacterized protein [Source:UniProtKB/TrEMBL;Acc:G4N1W1]	uncharacterized protein	protein_coding	GO:0005515(protein binding)	NA	NA	NA	154.367	163.568	119.012	124.39	59.1649	71.6615	115.361	0.576346	-0.794993	0.313839	-2.53313	0.011305	0.164703	none
5050001	MGG_13583	NA	NA	FAD dependent oxidoreductase superfamily protein	NA	NA	NA	NA	NA	2.59441	1.94724	1.20824	4.07836	17.5896	6.82491	5.70712	5.00511	2.3234	0.917465	2.53241	0.011328	0.164761	none
2674464	MGG_00552	MGG_00552T0	Acid phosphatase [Source:UniProtKB/TrEMBL;Acc:G4NBF7]	acid phosphatase	protein_coding	GO:0016788(hydrolase activity, acting on ester bonds); GO:0016787(hydrolase activity)	00730(Thiamine metabolism); 00740(Riboflavin metabolism)	K01078	ec:3.1.3.2	88.2098	110.993	118.408	118.273	199.882	192.235	138	1.61714	0.693446	0.274059	2.53028	0.0113972	0.165489	none
2685189	MGG_07016	NA	NA	uncharacterized protein	NA	NA	NA	NA	NA	244.523	196.022	298.436	193.722	127.924	149.01	201.606	0.633567	-0.65843	0.260349	-2.52903	0.0114379	0.165525	none
2684739	MGG_06584	MGG_06584T0	Putative uncharacterized protein [Source:UniProtKB/TrEMBL;Acc:G4N6B0]	uncharacterized protein	protein_coding	GO:0003674(molecular_function); GO:0008150(biological_process); GO:0005575(cellular_component); GO:0016020(membrane); GO:0016021(integral component of membrane)	NA	NA	NA	71.3462	58.4172	62.8286	48.9404	30.382	29.5746	50.2481	0.553223	-0.854066	0.337698	-2.52908	0.011436	0.165525	none
12985890	MGG_15251	MGG_15251T0	Putative uncharacterized protein [Source:UniProtKB/TrEMBL;Acc:G4N123]	uncharacterized protein	protein_coding	GO:0000166(nucleotide binding)	NA	NA	NA	12.3234	9.7362	7.85357	20.3918	28.7829	21.6122	16.7834	2.37271	1.24653	0.493395	2.52644	0.0115224	0.166469	none
2684173	MGG_05802	MGG_05802T0	Putative uncharacterized protein [Source:UniProtKB/TrEMBL;Acc:G4N0H4]	uncharacterized protein	protein_coding	GO:0003674(molecular_function); GO:0005575(cellular_component)	NA	NA	NA	23.3497	27.2613	29.6019	30.5877	67.1602	55.7367	38.9496	1.93626	0.953275	0.377872	2.52275	0.0116442	0.167393	none
2677923	MGG_04560	MGG_04560T0	Putative uncharacterized protein [Source:UniProtKB/TrEMBL;Acc:G4MRU3]	uncharacterized protein	protein_coding	GO:0016765(transferase activity, transferring alkyl or aryl (other than methyl) groups); GO:0005575(cellular_component); GO:0016020(membrane); GO:0016021(integral component of membrane); GO:0005783(endoplasmic reticulum); GO:0006486(protein glycosylation); GO:0019408(dolichol biosynthetic process); GO:1904423(dehydrodolichyl diphosphate synthase complex)	00900(Terpenoid backbone biosynthesis)	K19177	ec:2.5.1.87	131.666	107.098	102.096	73.4106	79.9526	60.2867	92.4184	0.622634	-0.683543	0.270924	-2.52301	0.0116356	0.167393	none
2681557	MGG_02460	MGG_02460T0	Ribosome biogenesis protein YTM1 [Source:UniProtKB/Swiss-Prot;Acc:A4R2Q6]	ribosome biogenesis protein YTM1	protein_coding	GO:0005634(nucleus); GO:0005654(nucleoplasm); GO:0005730(nucleolus); GO:0006364(rRNA processing); GO:0042254(ribosome biogenesis); GO:0042273(ribosomal large subunit biogenesis); GO:0043021(ribonucleoprotein complex binding); GO:0000463(maturation of LSU-rRNA from tricistronic rRNA transcript (SSU-rRNA, 5.8S rRNA, LSU-rRNA)); GO:0000466(maturation of 5.8S rRNA from tricistronic rRNA transcript (S…	NA	K14863	NA	92.75	73.346	105.721	61.1755	47.9716	53.4618	72.4043	0.595083	-0.748837	0.296834	-2.52274	0.0116444	0.167393	none
12984980	MGG_17476	NA	NA	uncharacterized protein	NA	NA	NA	NA	NA	106.371	129.167	85.7851	103.998	374.178	170.623	161.687	2.02293	1.01645	0.403667	2.51804	0.0118011	0.169084	none
5051743	MGG_14340	NA	NA	uncharacterized protein	NA	NA	NA	NA	NA	56.4283	5.19264	10.2701	4.07836	0	7.96239	13.9886	0.175064	-2.51404	0.998357	-2.51818	0.0117962	0.169084	none
2682366	MGG_02813	MGG_02813T0	Malate synthase [Source:UniProtKB/TrEMBL;Acc:G4NIW7]	malate synthase	protein_coding	GO:0005737(cytoplasm); GO:0043581(obsolete mycelium development); GO:0006097(glyoxylate cycle); GO:0006099(tricarboxylic acid cycle); GO:0016740(transferase activity); GO:0003824(catalytic activity); GO:0004474(malate synthase activity); GO:0003674(molecular_function); GO:0005575(cellular_component); GO:0005975(carbohydrate metabolic process)	00620(Pyruvate metabolism); 00630(Glyoxylate and dicarboxylate metabolism)	K01638	ec:2.3.3.9	826.318	1577.26	836.103	2049.38	1477.52	1785.85	1425.41	1.63964	0.713381	0.283448	2.5168	0.0118427	0.16912	none
2685104	MGG_06931	NA	NA	glycoprotein endopeptidase kae-1	NA	NA	NA	K01409	ec:2.3.1.234	40.2133	38.9448	44.7049	26.5094	11.1934	22.7497	30.7192	0.485255	-1.04319	0.414422	-2.51721	0.011829	0.16912	none
2678006	MGG_04495	MGG_04495T0	Phosphoglucomutase [Source:UniProtKB/TrEMBL;Acc:G4MS90]	phosphoglucomutase	protein_coding	GO:0046872(metal ion binding); GO:0005975(carbohydrate metabolic process); GO:0000287(magnesium ion binding); GO:0016868(intramolecular transferase activity, phosphotransferases); GO:0005575(cellular_component); GO:0016853(isomerase activity); GO:0071704(organic substance metabolic process)	00010(Glycolysis / Gluconeogenesis); 00030(Pentose phosphate pathway); 00052(Galactose metabolism); 00230(Purine metabolism); 00500(Starch and sucrose metabolism); 00520(Amino sugar and nucleotide sugar metabolism); 01250(Biosynthesis of nucleotide sugars)	K01835	ec:5.4.2.2	292.519	260.93	294.811	226.349	187.089	184.272	240.995	0.701217	-0.512066	0.203546	-2.51572	0.0118789	0.169357	none
2683518	MGG_07598	MGG_07598T0	Putative uncharacterized protein [Source:UniProtKB/TrEMBL;Acc:G4N2J9]	uncharacterized protein	protein_coding	GO:0003674(molecular_function); GO:0008150(biological_process); GO:0005575(cellular_component)	NA	NA	NA	8.43182	12.9816	19.3319	4.07836	0	4.54994	8.22893	0.216516	-2.20745	0.878149	-2.51376	0.0119453	0.170024	none
2674373	MGG_00052	MGG_00052T0	Putative uncharacterized protein [Source:UniProtKB/TrEMBL;Acc:G4NET4]	uncharacterized protein	protein_coding	GO:0043581(obsolete mycelium development); GO:0003674(molecular_function); GO:0005575(cellular_component)	NA	NA	NA	70.6976	110.993	61.6203	75.4497	236.66	168.348	120.628	1.98458	0.988834	0.393752	2.51131	0.0120283	0.170924	none
2684096	MGG_05879	MGG_05879T0	Putative uncharacterized protein [Source:UniProtKB/TrEMBL;Acc:G4N3X8]	uncharacterized protein	protein_coding	GO:0016787(hydrolase activity); GO:0006629(lipid metabolic process); GO:0016788(hydrolase activity, acting on ester bonds)	NA	NA	NA	25.9441	11.0344	20.5401	40.7836	51.1697	31.8496	30.2202	2.13792	1.09621	0.436826	2.50948	0.012091	0.171534	none
2682968	MGG_07083	NA	NA	uncharacterized protein	NA	NA	NA	NA	NA	99.236	77.2405	61.0162	79.5281	179.094	167.21	110.554	1.8073	0.853833	0.340692	2.50617	0.0122045	0.172861	none
2677332	MGG_12108	NA	NA	leucine Rich Repeat domain-containing protein	NA	NA	NA	NA	NA	173.177	174.602	192.11	254.898	254.249	246.834	215.978	1.39898	0.484373	0.193323	2.50552	0.0122273	0.172901	none
2680969	MGG_10012	NA	NA	salicylate hydroxylase	NA	NA	NA	K00480	ec:1.14.13.1	20.1066	16.227	27.7896	50.9796	31.981	45.4994	32.0972	1.99356	0.995347	0.397497	2.50404	0.0122785	0.173341	none
5050150	MGG_12779	MGG_12779T0	Putative uncharacterized protein [Source:UniProtKB/TrEMBL;Acc:G4N5Z7]	uncharacterized protein	protein_coding	GO:0005575(cellular_component)	NA	NA	NA	12.3234	11.0344	12.0824	20.3918	41.5754	20.4747	19.647	2.32153	1.21508	0.485756	2.50141	0.01237	0.174348	none
2677491	MGG_03915	MGG_03915T0	Pyridoxamine phosphate oxidase [Source:UniProtKB/TrEMBL;Acc:G4NH78]	pyridoxamine phosphate oxidase	protein_coding	GO:0043581(obsolete mycelium development); GO:0016491(oxidoreductase activity); GO:0055114(oxidation-reduction process); GO:0010181(FMN binding); GO:0008150(biological_process); GO:0005575(cellular_component); GO:0048037(obsolete cofactor binding)	NA	NA	NA	109.614	197.32	183.049	220.232	375.777	235.459	220.242	1.69717	0.763133	0.305541	2.49764	0.0125022	0.175925	none
2675732	MGG_04975	MGG_04975T0	Putative uncharacterized protein [Source:UniProtKB/TrEMBL;Acc:G4N3J2]	uncharacterized protein	protein_coding	GO:0008270(zinc ion binding); GO:0000166(nucleotide binding); GO:0016491(oxidoreductase activity); GO:0055114(oxidation-reduction process)	NA	K00344	ec:1.6.5.5	57.7255	43.4883	22.9566	55.0579	123.127	75.074	62.9049	2.04826	1.0344	0.414682	2.49443	0.0126159	0.177237	none
2678194	MGG_04696	MGG_04696T0	60S ribosomal protein L10a [Source:UniProtKB/TrEMBL;Acc:G4MTC2]	60S ribosomal protein L10a	protein_coding	GO:0003723(RNA binding); GO:0043581(obsolete mycelium development); GO:0006412(translation); GO:0030529(GO_0030529); GO:0003735(structural constituent of ribosome); GO:0005840(ribosome); GO:0005622(intracellular); GO:0015934(large ribosomal subunit)	03010(Ribosome)	K02865	NA	2063.2	2070.56	2552.41	1894.4	978.62	1429.82	1831.5	0.643083	-0.636924	0.255571	-2.49216	0.012697	0.177799	none
2683551	MGG_07631	MGG_07631T0	Fungal cellulose binding domain-containing protein [Source:UniProtKB/TrEMBL;Acc:G4N2Z0]	fungal cellulose binding domain-containing protein	protein_coding	GO:0003674(molecular_function); GO:0008150(biological_process); GO:0005575(cellular_component); GO:0005576(extracellular region)	NA	NA	NA	264.629	165.515	143.781	130.508	84.7498	121.711	151.816	0.586678	-0.769359	0.3087	-2.49226	0.0126934	0.177799	none
12986608	MGG_17302	MGG_17302T0	Putative uncharacterized protein [Source:UniProtKB/TrEMBL;Acc:G4NBL7]	uncharacterized protein	protein_coding	GO:0016787(hydrolase activity); GO:0008152(metabolic process); GO:0016798(hydrolase activity, acting on glycosyl bonds)	NA	NA	NA	1.9458	0.64908	4.22884	6.11755	14.3915	10.2374	6.26168	4.51189	2.17373	0.873067	2.48977	0.0127828	0.178711	none
2683184	MGG_07288	NA	NA	F-box domain-containing protein	NA	NA	NA	NA	NA	69.4004	90.8712	74.3068	93.8024	155.108	127.398	101.815	1.61272	0.689497	0.277001	2.48915	0.0128049	0.178731	none
2678012	MGG_04780	MGG_04780T0; MGG_04780T1	Sugar transporter STL1; Sugar transporter STL1, variant [Source:UniProtKB/TrEMBL;Acc:G4MQS9]	sugar transporter STL1, variant; sugar transporter STL1	protein_coding	GO:0016021(integral component of membrane); GO:0006810(transport); GO:0055085(transmembrane transport); GO:0008643(carbohydrate transport); GO:0016020(membrane); GO:0005215(transporter activity); GO:0022891(GO_0022891); GO:0022857(transmembrane transporter activity)	NA	NA	NA	73.9406	53.2245	51.3503	83.6065	150.311	81.8989	82.3886	1.76838	0.822429	0.330534	2.48819	0.0128396	0.178794	none
5049032	MGG_13813	NA	NA	phosphoribosylglycinamide formyltransferase	NA	NA	00230(Purine metabolism); 00670(One carbon pool by folate)	K00601	ec:2.1.2.2	16.8636	22.7178	27.7896	8.15673	9.59431	7.96239	15.5141	0.380263	-1.39493	0.56069	-2.48788	0.0128507	0.178794	none
2676614	MGG_03537	MGG_03537T0	Importin subunit beta-3 [Source:UniProtKB/TrEMBL;Acc:G4N7Q6]	importin subunit beta-3	protein_coding	GO:0006886(intracellular protein transport); GO:0005622(intracellular); GO:0008565(obsolete protein transporter activity); GO:0005634(nucleus); GO:0005737(cytoplasm); GO:0015031(protein transport); GO:0008536(Ran GTPase binding); GO:0006606(protein import into nucleus); GO:0061608(nuclear import signal receptor activity); GO:0010389(regulation of G2/M transition of mitotic cell cycle); GO:0034399…	03013(Nucleocytoplasmic transport)	K20222	NA	441.698	460.198	511.69	367.053	302.221	353.758	406.103	0.723269	-0.467395	0.187944	-2.48689	0.0128865	0.179005	none
2684892	MGG_06719	NA	NA	ATP-citrate synthase subunit 1	NA	NA	00020(Citrate cycle (TCA cycle))	K01648	ec:2.3.3.8	470.236	612.731	647.013	428.228	327.806	431.107	486.187	0.686273	-0.543145	0.218567	-2.48503	0.0129541	0.179654	none
2681630	MGG_02004	MGG_02004T0	Putative uncharacterized protein [Source:UniProtKB/TrEMBL;Acc:G4MME9]	uncharacterized protein	protein_coding	GO:0003674(molecular_function); GO:0008150(biological_process); GO:0005575(cellular_component)	NA	NA	NA	12.972	12.3325	8.45769	6.11755	63.9621	29.5746	22.2361	2.9846	1.57754	0.635175	2.48363	0.0130051	0.180074	none
12985994	MGG_17652	NA	NA	uncharacterized protein	NA	NA	NA	NA	NA	10.3776	14.2798	18.1236	38.7445	27.1839	27.2996	22.6682	2.14912	1.10374	0.445162	2.47942	0.0131596	0.181556	none
2681220	MGG_02065	MGG_02065T1; MGG_02065T0	Kinesin light chain, variant [Source:UniProtKB/TrEMBL;Acc:G4MN92]	kinesin light chain, variant; kinesin light chain	protein_coding	GO:0003824(catalytic activity); GO:0043531(ADP binding); GO:0009116(nucleoside metabolic process); GO:0005515(protein binding); GO:0003777(microtubule motor activity); GO:0005871(kinesin complex); GO:0005856(cytoskeleton); GO:0005874(microtubule)	NA	NA	NA	40.8619	50.6282	38.6637	46.9012	91.146	90.9987	59.8666	1.78332	0.834563	0.336533	2.47988	0.0131425	0.181556	none
2679870	MGG_08884	NA	NA	uncharacterized protein	NA	NA	NA	NA	NA	80.4266	66.8552	88.8057	50.9796	47.9716	43.2244	63.0438	0.597821	-0.742215	0.299401	-2.479	0.0131751	0.181556	none
2675735	MGG_04870	MGG_04870T0	Putative uncharacterized protein [Source:UniProtKB/TrEMBL;Acc:G4N2N8]	uncharacterized protein	protein_coding	GO:0003674(molecular_function); GO:0008150(biological_process); GO:0005575(cellular_component)	NA	NA	NA	143.341	139.552	163.717	242.663	201.481	202.472	182.204	1.44202	0.528088	0.213073	2.47843	0.0131961	0.181556	none
12987045	MGG_15205	MGG_15205T0	Putative uncharacterized protein [Source:UniProtKB/TrEMBL;Acc:G4N1L1]	uncharacterized protein	protein_coding	NA	NA	NA	NA	2.59441	0	2.41648	10.1959	11.1934	5.68742	5.34793	5.29275	2.40402	0.970385	2.47739	0.0132349	0.181801	none
2679881	MGG_08895	MGG_08895T0	Fructose-1,6-bisphosphatase [Source:UniProtKB/TrEMBL;Acc:G4MVK8]	fructose-1,6-bisphosphatase	protein_coding	GO:0005975(carbohydrate metabolic process); GO:0005829(cytosol); GO:0016787(hydrolase activity); GO:0006094(gluconeogenesis); GO:0042132(fructose 1,6-bisphosphate 1-phosphatase activity); GO:0072593(reactive oxygen species metabolic process); GO:0042578(phosphoric ester hydrolase activity); GO:0005575(cellular_component); GO:0046872(metal ion binding); GO:0016311(dephosphorylation); GO:0016791(ph…	00010(Glycolysis / Gluconeogenesis); 00030(Pentose phosphate pathway); 00051(Fructose and mannose metabolism); 00680(Methane metabolism)	K03841	ec:3.1.3.11	533.15	603.644	413.219	685.165	820.314	714.34	628.305	1.43271	0.518747	0.209735	2.47335	0.0133854	0.183402	none
2675378	MGG_04968	MGG_04968T0	Putative uncharacterized protein [Source:UniProtKB/TrEMBL;Acc:G4N3I2]	uncharacterized protein	protein_coding	GO:0016021(integral component of membrane); GO:0055085(transmembrane transport); GO:0008324(cation transmembrane transporter activity); GO:0006812(cation transport); GO:0016020(membrane); GO:0098655(cation transmembrane transport)	NA	NA	NA	70.6976	102.555	85.7851	69.3322	39.9763	40.9494	68.2159	0.569425	-0.812422	0.328501	-2.47312	0.0133938	0.183402	none
2680267	MGG_09171	MGG_09171T0	Tetracycline resistance protein transposon [Source:UniProtKB/TrEMBL;Acc:G4MPB5]	tetracycline resistance protein transposon	protein_coding	GO:0008152(metabolic process); GO:0016491(oxidoreductase activity); GO:0055114(oxidation-reduction process); GO:0071949(FAD binding)	NA	NA	NA	5.83741	14.9288	6.04121	22.431	36.7782	14.7873	16.8007	2.74165	1.45504	0.5888	2.4712	0.013466	0.183995	none
2683901	MGG_07974	NA	NA	C-signal protein	NA	NA	NA	NA	NA	79.778	125.272	88.8057	177.409	175.896	123.986	128.524	1.61557	0.692045	0.280085	2.47084	0.0134796	0.183995	none
2682085	MGG_10452	MGG_10452T0	Putative uncharacterized protein [Source:UniProtKB/TrEMBL;Acc:G4MY19]	uncharacterized protein	protein_coding	GO:0003674(molecular_function); GO:0008150(biological_process); GO:0005575(cellular_component)	NA	NA	NA	124.531	133.71	245.877	397.641	198.282	304.846	234.148	1.78273	0.834091	0.33771	2.46984	0.0135173	0.184218	none
2678061	MGG_04738	MGG_04738T0	Short chain dehydrogenase/oxidoreductase [Source:UniProtKB/TrEMBL;Acc:G4MQV9]	short chain dehydrogenase/oxidoreductase	protein_coding	GO:0000166(nucleotide binding); GO:0008152(metabolic process); GO:0016491(oxidoreductase activity); GO:0055114(oxidation-reduction process); GO:0005575(cellular_component)	NA	NA	NA	365.811	327.785	278.5	265.094	1010.6	591.492	473.214	1.92312	0.943448	0.38233	2.46762	0.0136013	0.185072	none
5050526	MGG_12652	NA	NA	extracellular cell wall glucanase Crf1	NA	NA	NA	NA	NA	210.147	189.531	185.465	159.056	89.5469	130.811	160.76	0.645547	-0.631405	0.256463	-2.46197	0.0138177	0.187721	none
12986934	MGG_16562	MGG_16562T0	Putative uncharacterized protein [Source:UniProtKB/TrEMBL;Acc:G4MLV5]	uncharacterized protein	protein_coding	NA	NA	NA	NA	4.54021	6.4908	8.45769	32.6269	17.5896	9.09987	13.1342	2.93604	1.55387	0.631389	2.46104	0.0138536	0.187914	none
2680912	MGG_09942	MGG_09942T0	Putative uncharacterized protein [Source:UniProtKB/TrEMBL;Acc:G4MRL0]	uncharacterized protein	protein_coding	GO:0003674(molecular_function); GO:0005575(cellular_component); GO:0016020(membrane); GO:0016021(integral component of membrane)	NA	NA	NA	31.1329	27.9104	21.1442	34.6661	81.5517	43.2244	39.9383	1.99552	0.996761	0.405703	2.45687	0.0140153	0.188922	none
2683549	MGG_07629	MGG_07629T0	Putative uncharacterized protein [Source:UniProtKB/TrEMBL;Acc:G4N2Y8]	uncharacterized protein	protein_coding	GO:0005575(cellular_component)	NA	NA	NA	66.1574	86.3276	56.1832	140.704	143.915	78.4864	95.2955	1.72596	0.787403	0.320377	2.45774	0.0139814	0.188922	none
2680710	MGG_09763	NA	NA	uncharacterized protein	NA	NA	NA	NA	NA	59.0227	58.4172	82.7645	120.312	86.3488	119.436	87.7168	1.62766	0.702796	0.28605	2.4569	0.0140142	0.188922	none
5049476	MGG_13716	MGG_13716T0	Putative uncharacterized protein [Source:UniProtKB/TrEMBL;Acc:G4MNS8]	uncharacterized protein	protein_coding	GO:0003674(molecular_function); GO:0008150(biological_process); GO:0005575(cellular_component); GO:0016020(membrane); GO:0016021(integral component of membrane)	NA	NA	NA	61.6171	54.5227	35.039	30.5877	15.9905	28.4371	37.699	0.495981	-1.01164	0.411628	-2.45767	0.0139843	0.188922	none
2681819	MGG_10274	MGG_10274T0	Putative uncharacterized protein [Source:UniProtKB/TrEMBL;Acc:Q2KEJ5]	uncharacterized protein	protein_coding	GO:0043581(obsolete mycelium development); GO:0000166(nucleotide binding); GO:0008152(metabolic process); GO:0016491(oxidoreductase activity); GO:0055114(oxidation-reduction process); GO:0005575(cellular_component)	NA	NA	NA	112.208	96.7129	115.387	124.39	177.495	191.097	136.215	1.53149	0.61494	0.25037	2.45612	0.0140446	0.189023	none
5049997	MGG_13573	NA	NA	uncharacterized protein	NA	NA	NA	NA	NA	5.83741	16.8761	6.04121	12.2351	55.9668	19.3372	19.3823	3.05901	1.61306	0.65692	2.4555	0.014069	0.189058	none
2675856	MGG_05367	MGG_05367T0	Glutathione transferase omega-1 [Source:UniProtKB/TrEMBL;Acc:G4MKW5]	glutathione transferase omega-1	protein_coding	GO:0005737(cytoplasm); GO:0008152(metabolic process); GO:0016740(transferase activity); GO:0004364(glutathione transferase activity); GO:0016491(oxidoreductase activity); GO:0055114(oxidation-reduction process); GO:0005515(protein binding)	00480(Glutathione metabolism)	K00799	ec:2.5.1.18	79.778	105.8	112.971	140.704	196.683	134.223	128.36	1.57733	0.657486	0.267942	2.45384	0.0141341	0.189638	none
2681168	MGG_01953	MGG_01953T0	Putative uncharacterized protein [Source:UniProtKB/TrEMBL;Acc:G4NFZ7]	uncharacterized protein	protein_coding	GO:0003674(molecular_function); GO:0008150(biological_process); GO:0005575(cellular_component)	NA	NA	NA	9.08042	13.6307	24.1648	34.6661	33.5801	35.262	25.064	2.20185	1.13872	0.464514	2.45142	0.0142295	0.190341	none
2674360	MGG_00110	MGG_00110T0	Putative uncharacterized protein [Source:UniProtKB/TrEMBL;Acc:G4NEG7]	uncharacterized protein	protein_coding	GO:0016787(hydrolase activity); GO:0005575(cellular_component)	NA	NA	NA	77.1836	86.9767	85.181	132.547	103.938	143.323	104.858	1.52702	0.610718	0.249244	2.45028	0.0142745	0.190341	none
5051137	MGG_11165	MGG_11165T0	Putative uncharacterized protein [Source:UniProtKB/TrEMBL;Acc:G4MUU8]	uncharacterized protein	protein_coding	GO:0043581(obsolete mycelium development); GO:0005634(nucleus); GO:0006886(intracellular protein transport); GO:0005622(intracellular); GO:0008565(obsolete protein transporter activity); GO:0008536(Ran GTPase binding)	03013(Nucleocytoplasmic transport)	K20224	NA	190.689	184.339	195.131	138.664	134.32	127.398	161.757	0.700299	-0.513957	0.209715	-2.45074	0.0142561	0.190341	none
2679377	MGG_01337	MGG_01337T0	Putative uncharacterized protein [Source:UniProtKB/TrEMBL;Acc:G4MYN1]	uncharacterized protein	protein_coding	GO:0003674(molecular_function); GO:0008150(biological_process); GO:0005575(cellular_component)	NA	NA	NA	36.3217	40.2429	40.4761	30.5877	11.1934	15.9248	29.1244	0.476837	-1.06843	0.435894	-2.45113	0.014241	0.190341	none
2678277	MGG_08011	NA	NA	D-amino-acid oxidase	NA	NA	00260(Glycine, serine and threonine metabolism); 00330(Arginine and proline metabolism); 00470(D-Amino acid metabolism); 04146(Peroxisome)	K00273	ec:1.4.3.3	63.563	85.6785	66.4533	140.704	116.731	92.1362	94.2109	1.60615	0.683604	0.27924	2.44809	0.0143618	0.190917	none
2680503	MGG_09460	MGG_09460T0	Cell wall protein [Source:UniProtKB/TrEMBL;Acc:G4N275]	cell wall protein	protein_coding	GO:0016020(membrane); GO:0016021(integral component of membrane)	NA	NA	NA	59.0227	57.119	49.5379	12.2351	30.382	38.6745	41.1619	0.509264	-0.973515	0.397585	-2.44857	0.0143424	0.190917	none
2675482	MGG_05266	MGG_05266T0	Eukaryotic translation initiation factor 3 subunit L [Source:UniProtKB/Swiss-Prot;Acc:Q5EN08]	eukaryotic translation initiation factor 3	protein_coding	GO:0005575(cellular_component); GO:0006412(translation); GO:0005737(cytoplasm); GO:0003743(translation initiation factor activity); GO:0006413(translational initiation); GO:0005852(eukaryotic translation initiation factor 3 complex); GO:0001732(formation of cytoplasmic translation initiation complex); GO:0002183(cytoplasmic translational initiation); GO:0016282(eukaryotic 43S preinitiation comple…	NA	K15029	NA	583.741	586.119	663.929	501.639	332.603	448.169	519.367	0.69845	-0.517771	0.211762	-2.44506	0.0144829	0.192232	none
5049364	MGG_13868	NA	NA	uncharacterized protein	NA	NA	NA	NA	NA	4.54021	0	1.20824	10.1959	7.99526	11.3748	5.88574	5.18059	2.37312	0.97098	2.44404	0.0145236	0.192477	none
2684467	MGG_06312	MGG_06312T0	C6 zinc finger domain-containing protein [Source:UniProtKB/TrEMBL;Acc:G4N853]	C6 zinc finger domain-containing protein	protein_coding	GO:0008270(zinc ion binding); GO:0005634(nucleus); GO:0006355(regulation of transcription, DNA-templated); GO:0003700(DNA-binding transcription factor activity); GO:0000981(DNA-binding transcription factor activity, RNA polymerase II-specific); GO:0006357(regulation of transcription by RNA polymerase II); GO:0042025(host cell nucleus)	NA	NA	NA	60.3199	76.5914	76.7233	77.4889	156.707	121.711	94.9236	1.67608	0.74509	0.305084	2.44224	0.0145963	0.192721	none
2678921	MGG_14136	MGG_14136T0	Quinate permease [Source:UniProtKB/TrEMBL;Acc:G4NFN3]	quinate permease	protein_coding	GO:0016021(integral component of membrane); GO:0006810(transport); GO:0055085(transmembrane transport); GO:0016020(membrane); GO:0005215(transporter activity); GO:0022891(GO_0022891); GO:0022857(transmembrane transporter activity); GO:0003674(molecular_function); GO:0005575(cellular_component)	NA	NA	NA	489.694	503.686	541.292	409.876	297.424	389.02	438.499	0.713883	-0.486241	0.199081	-2.44243	0.0145886	0.192721	none
2682338	MGG_02598	MGG_02598T0	30S ribosomal protein S16 [Source:UniProtKB/TrEMBL;Acc:G4NJP1]	30S ribosomal protein S16	protein_coding	GO:0006412(translation); GO:0003735(structural constituent of ribosome); GO:0005763(mitochondrial small ribosomal subunit); GO:0005840(ribosome); GO:0005622(intracellular)	03010(Ribosome)	K02959	NA	81.0752	66.2061	95.4511	59.1363	31.981	48.9118	63.7936	0.572938	-0.80355	0.329063	-2.44193	0.0146088	0.192721	none
2684054	MGG_13261	NA	NA	uncharacterized protein	NA	NA	NA	NA	NA	24.6469	22.7178	12.0824	26.5094	59.1649	39.8119	30.8222	2.12963	1.0906	0.446836	2.44072	0.0146579	0.193074	none
2680333	MGG_09433	MGG_09433T0	Endoglucanase family 5 glycoside hydrolase [Source:UniProtKB/TrEMBL;Acc:G4NHU4]	endoglucanase family 5 glycoside hydrolase	protein_coding	GO:0005975(carbohydrate metabolic process); GO:0016787(hydrolase activity); GO:0003824(catalytic activity); GO:0004553(hydrolase activity, hydrolyzing O-glycosyl compounds); GO:0043169(cation binding); GO:0008152(metabolic process); GO:0016798(hydrolase activity, acting on glycosyl bonds)	NA	NA	NA	69.4004	60.3644	60.4121	40.7836	33.5801	37.537	50.3463	0.586598	-0.769556	0.315696	-2.43765	0.0147832	0.194429	none
2678169	MGG_04504	MGG_04504T0	Translation machinery-associated protein 22 [Source:UniProtKB/Swiss-Prot;Acc:A4QVI3]	translation machinery-associated protein 22	protein_coding	GO:0005575(cellular_component); GO:0005737(cytoplasm); GO:0003743(translation initiation factor activity); GO:0006413(translational initiation); GO:0005840(ribosome)	NA	K24272	NA	121.288	89.573	126.261	69.3322	67.1602	75.074	91.4482	0.629198	-0.668413	0.274438	-2.43557	0.0148682	0.195249	none
2676665	MGG_03724	MGG_03724T0	CLAP1 [Source:UniProtKB/TrEMBL;Acc:G4N6G7]	CLAP1	protein_coding	GO:0046872(metal ion binding); GO:0016021(integral component of membrane); GO:0005524(ATP binding); GO:0000166(nucleotide binding); GO:0008152(metabolic process); GO:0016787(hydrolase activity); GO:0016020(membrane); GO:0003824(catalytic activity); GO:0030001(metal ion transport); GO:0006825(copper ion transport); GO:0015662(ion transmembrane transporter activity, phosphorylative mechanism); GO:0…	NA	K17686	ec:7.2.2.8	140.098	142.798	151.03	175.37	294.226	194.51	183.005	1.53171	0.615147	0.252964	2.43176	0.0150256	0.196125	none
2682268	MGG_10655	NA	NA	delta-aminolevulinic acid dehydratase	NA	NA	00860(Porphyrin metabolism); 01240(Biosynthesis of cofactors)	K01698	ec:4.2.1.24	144.638	138.903	148.614	171.291	243.056	211.572	176.346	1.45327	0.539306	0.22169	2.4327	0.0149867	0.196125	none
5050879	MGG_12272	MGG_12272T0	Trm-112 [Source:UniProtKB/TrEMBL;Acc:G4MY92]	trm-112	protein_coding	GO:0003674(molecular_function); GO:0008150(biological_process); GO:0046982(protein heterodimerization activity); GO:0004809(tRNA (guanine-N2-)-methyltransferase activity); GO:0008276(protein methyltransferase activity); GO:0016435(rRNA (guanine) methyltransferase activity); GO:0000470(maturation of LSU-rRNA); GO:0018364(peptidyl-glutamine methylation); GO:0030488(tRNA methylation); GO:0030490(mat…	NA	K15448	NA	27.2413	36.9975	33.2266	12.2351	15.9905	17.0623	23.7922	0.472241	-1.0824	0.444902	-2.4329	0.0149782	0.196125	none
2683081	MGG_07362	NA	NA	uncharacterized protein	NA	NA	NA	NA	NA	17.5122	12.9816	15.7071	6.11755	6.39621	2.27497	10.1649	0.303052	-1.72236	0.708203	-2.43202	0.0150149	0.196125	none
2681278	MGG_02208	MGG_02208T0	Putative uncharacterized protein [Source:UniProtKB/TrEMBL;Acc:G4MPL1]	uncharacterized protein	protein_coding	GO:0003674(molecular_function); GO:0008150(biological_process); GO:0005575(cellular_component); GO:0016020(membrane); GO:0016021(integral component of membrane)	NA	NA	NA	0.648602	4.54356	0.604121	6.11755	19.1886	5.68742	6.13165	5.36852	2.42452	0.997819	2.42982	0.0151062	0.196589	none
2677298	MGG_03857	MGG_03857T0	T-complex protein 1 subunit zeta [Source:UniProtKB/TrEMBL;Acc:G4NHF7]	T-complex protein 1 subunit zeta	protein_coding	GO:0005737(cytoplasm); GO:0005524(ATP binding); GO:0000166(nucleotide binding); GO:0051082(unfolded protein binding); GO:0006457(protein folding); GO:0005832(chaperonin-containing T-complex); GO:0044267(cellular protein metabolic process); GO:0005575(cellular_component)	NA	K09498	NA	207.552	198.618	251.314	146.821	163.103	144.461	185.312	0.690459	-0.534372	0.219923	-2.42982	0.0151065	0.196589	none
2674857	MGG_00352	MGG_00352T0	Putative uncharacterized protein [Source:UniProtKB/TrEMBL;Acc:G4NCQ3]	uncharacterized protein	protein_coding	NA	NA	NA	NA	117.397	114.238	81.5563	144.782	172.698	158.11	131.464	1.52198	0.605953	0.249772	2.42602	0.0152652	0.198356	none
2682217	MGG_10614	MGG_10614T0	Isoflavone reductase [Source:UniProtKB/TrEMBL;Acc:G4MQ12]	isoflavone reductase	protein_coding	GO:0000166(nucleotide binding)	NA	NA	NA	3.24301	4.54356	8.45769	16.3135	12.7924	18.1997	10.5916	2.91108	1.54155	0.636066	2.42358	0.0153686	0.19938	none
2682925	MGG_10710	MGG_10710T0	Oxidoreductase [Source:UniProtKB/TrEMBL;Acc:G4NIA6]	oxidoreductase	protein_coding	GO:0008152(metabolic process); GO:0016491(oxidoreductase activity); GO:0055114(oxidation-reduction process); GO:0005575(cellular_component); GO:0071949(FAD binding)	NA	NA	NA	42.1591	59.7153	34.4349	8.15673	23.9858	28.4371	32.8148	0.461736	-1.11486	0.460103	-2.42307	0.0153901	0.19938	none
2682395	MGG_02842	MGG_02842T0	Hsp70-like protein [Source:UniProtKB/TrEMBL;Acc:G4NLU9]	hsp70-like protein	protein_coding	GO:0005524(ATP binding); GO:0000166(nucleotide binding); GO:0005575(cellular_component)	NA	NA	NA	228.308	255.737	336.495	218.193	131.122	178.585	224.74	0.64107	-0.641446	0.264864	-2.4218	0.015444	0.199779	none
2676875	MGG_03459	MGG_03459T0	Atg26p [Source:UniProtKB/TrEMBL;Acc:G4N8A1]	Atg26p	protein_coding	GO:0005975(carbohydrate metabolic process); GO:0016758(transferase activity, transferring hexosyl groups); GO:0008152(metabolic process); GO:0030259(lipid glycosylation); GO:0006914(autophagy); GO:0016906(sterol 3-beta-glucosyltransferase activity); GO:0102202(soladodine glucosyltransferase activity); GO:0102203(brassicasterol glucosyltransferase activity); GO:0102205(cholesterol alpha-glucosyltr…	NA	K05841	ec:2.4.1.173	82.3724	88.9239	74.911	108.077	167.9	111.473	105.61	1.57418	0.654602	0.27042	2.42069	0.0154913	0.199891	none
12986207	MGG_17696	MGG_17696T0	Putative uncharacterized protein [Source:UniProtKB/TrEMBL;Acc:G4NGP8]	uncharacterized protein	protein_coding	GO:0003674(molecular_function); GO:0008150(biological_process); GO:0005575(cellular_component)	NA	NA	NA	77.1836	74.6442	62.8286	53.0187	38.3773	37.537	57.2649	0.592228	-0.755775	0.312238	-2.42051	0.0154989	0.199891	none
2674187	MGG_00814	MGG_00814T0	Hsp90-like protein [Source:UniProtKB/TrEMBL;Acc:G4NEA2]	hsp90-like protein	protein_coding	GO:0005737(cytoplasm); GO:0005829(cytosol); GO:0006950(response to stress); GO:0001671(ATPase activator activity); GO:0006457(protein folding); GO:0032781(positive regulation of ATPase activity); GO:0051087(chaperone binding); GO:0031072(heat shock protein binding); GO:0051879(Hsp90 protein binding)	NA	NA	NA	161.502	129.167	129.886	267.133	191.886	179.723	176.549	1.50939	0.593966	0.245511	2.4193	0.0155504	0.200258	none
2681349	MGG_02252	MGG_02252T0	Tetrahydroxynaphthalene reductase [Source:UniProtKB/Swiss-Prot;Acc:Q12634]	tetrahydroxynaphthalene reductase	protein_coding	GO:0047039(tetrahydroxynaphthalene reductase activity); GO:0042438(melanin biosynthetic process); GO:0005575(cellular_component); GO:0016491(oxidoreductase activity); GO:0055114(oxidation-reduction process)	NA	K17739	ec:1.1.1.252	81.7238	166.164	114.783	152.939	257.447	203.61	162.778	1.69711	0.763077	0.315911	2.41548	0.0157145	0.20207	none
12985656	MGG_15990	NA	NA	uncharacterized protein	NA	NA	NA	NA	NA	23.3497	46.0847	68.2656	75.4497	121.528	75.074	68.2919	1.97233	0.9799	0.40675	2.4091	0.015992	0.204816	none
2684404	MGG_06249	MGG_06249T0	Translationally controlled tumor protein [Source:UniProtKB/TrEMBL;Acc:G4N8H7]	translationally controlled tumor protein	protein_coding	GO:0003674(molecular_function); GO:0006412(translation)	NA	NA	NA	612.28	645.185	709.238	536.305	412.556	489.118	567.447	0.73033	-0.453379	0.188138	-2.40982	0.0159603	0.204816	none
2683496	MGG_07576	NA	NA	acetoin(diacetyl) reductase	NA	NA	NA	NA	NA	85.6154	94.7656	61.6203	57.0971	41.5754	44.3619	64.1726	0.586037	-0.770936	0.320031	-2.40894	0.0159991	0.204816	none
2682022	MGG_10410	NA	NA	pleiotropic drug resistance protein 1	NA	NA	NA	NA	NA	142.044	137.605	130.49	146.821	321.41	200.197	179.761	1.6336	0.708058	0.294107	2.40749	0.0160628	0.205026	none
5049790	MGG_12016	NA	NA	uncharacterized protein	NA	NA	NA	K05972	ec:3.1.1.72	23.9983	15.5779	18.1236	10.1959	1.59905	7.96239	12.9095	0.33872	-1.56183	0.648634	-2.40788	0.0160453	0.205026	none
2684826	MGG_06653	NA	NA	uncharacterized protein	NA	NA	NA	NA	NA	1290.72	1063.84	1061.44	1011.43	590.05	699.553	952.839	0.672356	-0.572703	0.23805	-2.4058	0.0161369	0.205668	none
2675640	MGG_04995	MGG_04995T0	U3 small nucleolar RNA-associated protein 10 [Source:UniProtKB/TrEMBL;Acc:G4N3L3]	U3 small nucleolar RNA-associated protein 10	protein_coding	GO:0005739(mitochondrion); GO:0005730(nucleolus); GO:0042254(ribosome biogenesis); GO:0005732(small nucleolar ribonucleoprotein complex); GO:0030490(maturation of SSU-rRNA); GO:0030515(snoRNA binding); GO:0005634(nucleus); GO:0006364(rRNA processing)	03008(Ribosome biogenesis in eukaryotes)	K14550	NA	116.748	126.571	153.447	103.998	54.3678	86.4488	106.93	0.613842	-0.70406	0.292803	-2.40455	0.0161922	0.20607	none
12984527	MGG_17113	MGG_17113T0	Putative uncharacterized protein [Source:UniProtKB/TrEMBL;Acc:G4N955]	uncharacterized protein	protein_coding	NA	NA	NA	NA	18.8094	17.5252	16.3113	24.4702	43.1744	35.262	25.9254	1.97481	0.981713	0.408841	2.40121	0.0163409	0.207049	none
2678421	MGG_08035	MGG_08035T0	E3 ubiquitin-protein ligase CHIP [Source:UniProtKB/TrEMBL;Acc:G4MXP4]	E3 ubiquitin-protein ligase CHIP	protein_coding	GO:0043581(obsolete mycelium development); GO:0004842(ubiquitin-protein transferase activity); GO:0016567(protein ubiquitination); GO:0016874(ligase activity); GO:0000151(ubiquitin ligase complex); GO:0003755(peptidyl-prolyl cis-trans isomerase activity); GO:0000413(protein peptidyl-prolyl isomerization); GO:0005515(protein binding)	04120(Ubiquitin mediated proteolysis); 04141(Protein processing in endoplasmic reticulum)	K09561	ec:2.3.2.27	57.0769	48.0319	46.5173	61.1755	91.146	93.2737	66.2035	1.63721	0.711243	0.296098	2.40205	0.0163034	0.207049	none
2675998	MGG_05413	MGG_05413T0	MFS transporter [Source:UniProtKB/TrEMBL;Acc:G4MLD1]	MFS transporter	protein_coding	GO:0016021(integral component of membrane); GO:0055085(transmembrane transport); GO:0016020(membrane); GO:0022857(transmembrane transporter activity)	NA	NA	NA	158.259	230.423	259.168	120.312	174.297	106.924	174.897	0.618311	-0.693595	0.288819	-2.40149	0.0163286	0.207049	none
2678439	MGG_08072	NA	NA	cholesterol oxidase	NA	NA	NA	NA	NA	136.855	164.866	123.241	132.547	313.414	267.309	189.705	1.68682	0.754302	0.314314	2.39983	0.0164025	0.207525	none
2684514	MGG_06359	MGG_06359T0	Putative uncharacterized protein [Source:UniProtKB/TrEMBL;Acc:G4N7U6]	uncharacterized protein	protein_coding	GO:0005575(cellular_component)	NA	NA	NA	27.8899	29.2086	22.3525	71.3714	33.5801	46.6369	38.5065	1.88562	0.915035	0.381523	2.39837	0.0164681	0.208051	none
2683343	MGG_07423	NA	NA	uncharacterized protein	NA	NA	NA	NA	NA	14.2692	20.7706	15.7071	14.2743	62.363	38.6745	27.6765	2.30101	1.20227	0.501485	2.39741	0.0165113	0.208292	none
2683596	MGG_07676	NA	NA	uncharacterized protein	NA	NA	NA	NA	NA	40.8619	64.2589	22.9566	48.9404	113.533	96.6862	64.5394	2.03986	1.02847	0.429312	2.39562	0.0165922	0.208705	none
2678930	MGG_08705	NA	NA	methyltransferase	NA	NA	NA	K19306	ec:2.1.1.309	39.5647	31.1558	37.4555	12.2351	14.3915	23.8872	26.4483	0.483413	-1.04867	0.437654	-2.39612	0.0165696	0.208705	none
2683402	MGG_07482	NA	NA	uncharacterized protein	NA	NA	NA	NA	NA	45.4021	29.2086	18.1236	40.7836	132.721	42.0869	51.3877	2.32654	1.21818	0.508731	2.39456	0.0166405	0.209008	none
2675706	MGG_05024	MGG_05024T0	N-carbamoyl-L-amino acid hydrolase [Source:UniProtKB/TrEMBL;Acc:G4N3V0]	N-carbamoyl-L-amino acid hydrolase	protein_coding	GO:0008152(metabolic process); GO:0016787(hydrolase activity); GO:0016813(hydrolase activity, acting on carbon-nitrogen (but not peptide) bonds, in linear amidines); GO:0008233(peptidase activity); GO:0006508(proteolysis); GO:0005576(extracellular region)	NA	NA	NA	75.2378	81.135	62.8286	126.429	127.924	90.9987	94.0923	1.56443	0.645633	0.269939	2.39177	0.0167673	0.209992	none
12986683	MGG_15888	NA	NA	uncharacterized protein	NA	NA	NA	NA	NA	27.2413	32.454	36.2472	8.15673	11.1934	21.6122	22.8175	0.447952	-1.15858	0.484366	-2.39196	0.0167588	0.209992	none
2680353	MGG_09412	MGG_09412T0	Putative uncharacterized protein [Source:UniProtKB/TrEMBL;Acc:G4NHW8]	uncharacterized protein	protein_coding	NA	NA	NA	NA	108.965	134.36	55.5791	89.724	530.885	443.619	227.189	3.5645	1.8337	0.7674	2.3895	0.0168715	0.210991	none
2674339	MGG_00299	MGG_00299T0	Putative uncharacterized protein [Source:UniProtKB/TrEMBL;Acc:G4ND18]	uncharacterized protein	protein_coding	GO:0003674(molecular_function); GO:0008150(biological_process); GO:0005575(cellular_component)	NA	NA	NA	49.2937	49.9791	42.2884	73.4106	86.3488	68.2491	61.595	1.60736	0.684696	0.286683	2.38834	0.0169246	0.211123	none
2683836	MGG_13908	MGG_13908T0	Putative uncharacterized protein [Source:UniProtKB/TrEMBL;Acc:G4N2E0]	uncharacterized protein	protein_coding	NA	NA	NA	NA	14.2692	18.1742	13.2907	4.07836	7.99526	2.27497	10.0138	0.30386	-1.71852	0.719586	-2.38821	0.0169308	0.211123	none
2682266	MGG_10653	MGG_10653T0	Eukaryotic translation initiation factor 3 subunit F [Source:UniProtKB/Swiss-Prot;Acc:A4R0E5]	eukaryotic translation initiation factor 3 subunit F	protein_coding	GO:0001731(formation of translation preinitiation complex); GO:0006446(regulation of translational initiation); GO:0005852(eukaryotic translation initiation factor 3 complex); GO:0003743(translation initiation factor activity); GO:0033290(eukaryotic 48S preinitiation complex); GO:0016282(eukaryotic 43S preinitiation complex); GO:0008150(biological_process); GO:0005575(cellular_component); GO:0006…	NA	K03249	NA	340.516	305.067	395.699	303.838	188.688	205.885	289.949	0.666736	-0.584812	0.244931	-2.38766	0.016956	0.211132	none
5049174	MGG_14179	MGG_14179T0	Putative uncharacterized protein [Source:UniProtKB/TrEMBL;Acc:Q2KEL0]	uncharacterized protein	protein_coding	NA	NA	NA	NA	29.8357	21.4196	16.9154	4.07836	1.59905	14.7873	14.7726	0.324742	-1.62264	0.680522	-2.3844	0.0171071	0.212708	none
12986003	MGG_17659	MGG_17659T0	Putative uncharacterized protein [Source:UniProtKB/TrEMBL;Acc:G4NFF2]	uncharacterized protein	protein_coding	GO:0003674(molecular_function); GO:0008150(biological_process); GO:0005575(cellular_component)	NA	NA	NA	16.8636	14.9288	54.3709	91.7632	51.1697	56.8742	47.6617	2.29853	1.20071	0.504482	2.38009	0.0173085	0.214781	none
2683760	MGG_07833	NA	NA	ferric reductase	NA	NA	NA	NA	NA	33.7273	27.2613	38.6637	36.7053	97.5422	55.7367	48.2728	1.91514	0.937452	0.394123	2.37858	0.0173795	0.214781	none
2685060	MGG_06887	NA	NA	uncharacterized protein	NA	NA	NA	NA	NA	34.3759	19.4724	19.936	48.9404	43.1744	46.6369	35.4227	1.88025	0.910924	0.383033	2.37819	0.0173979	0.214781	none
2681120	MGG_01905	MGG_01905T0	Putative uncharacterized protein [Source:UniProtKB/TrEMBL;Acc:G4NG30]	uncharacterized protein	protein_coding	GO:0003674(molecular_function); GO:0008150(biological_process); GO:0005575(cellular_component); GO:0016020(membrane); GO:0016021(integral component of membrane)	NA	NA	NA	154.367	201.215	233.191	314.034	263.844	284.371	241.837	1.46202	0.54796	0.230356	2.37875	0.0173712	0.214781	none
2678111	MGG_04584	MGG_04584T0	HNRNP arginine N-methyltransferase [Source:UniProtKB/TrEMBL;Acc:G4MSU6]	HNRNP arginine N-methyltransferase	protein_coding	GO:0032259(methylation); GO:0016740(transferase activity); GO:0008168(methyltransferase activity); GO:0006479(protein methylation); GO:0016274(protein-arginine N-methyltransferase activity); GO:0035246(peptidyl-arginine N-methylation); GO:0018216(peptidyl-arginine methylation)	NA	K11434	ec:2.1.1.319	287.979	292.735	396.303	275.29	148.712	203.61	267.438	0.639551	-0.64487	0.271035	-2.37929	0.0173462	0.214781	none
2674444	MGG_00385	MGG_00385T0	L-aminoadipate-semialdehyde dehydrogenase [Source:UniProtKB/TrEMBL;Acc:G4NCL3]	L-aminoadipate-semialdehyde dehydrogenase	protein_coding	GO:0000166(nucleotide binding); GO:0008152(metabolic process); GO:0003824(catalytic activity); GO:0048037(obsolete cofactor binding); GO:0031177(phosphopantetheine binding); GO:0008610(lipid biosynthetic process)	NA	NA	NA	60.9685	51.2773	36.2472	73.4106	498.904	80.7614	133.595	4.39862	2.13705	0.899761	2.37513	0.0175426	0.21518	none
2678528	MGG_12475	MGG_12475T0	Putative uncharacterized protein [Source:UniProtKB/TrEMBL;Acc:G4MX77]	uncharacterized protein	protein_coding	NA	NA	NA	NA	10.3776	7.78896	9.66593	26.5094	35.1792	10.2374	16.6264	2.53089	1.33965	0.564585	2.3728	0.017654	0.21518	none
2682743	MGG_02573	MGG_02573T0	Beta-1,3-glucan-binding protein [Source:UniProtKB/TrEMBL;Acc:G4NJV6]	beta-1,3-glucan-binding protein	protein_coding	GO:0005975(carbohydrate metabolic process); GO:0044271(cellular nitrogen compound biosynthetic process); GO:0004553(hydrolase activity, hydrolyzing O-glycosyl compounds); GO:0016020(membrane); GO:0016021(integral component of membrane)	NA	NA	NA	127.775	184.339	105.117	99.9199	484.513	279.821	213.581	2.07634	1.05405	0.443833	2.37487	0.0175551	0.21518	none
2679367	MGG_01327	MGG_01327T0	Putative uncharacterized protein [Source:UniProtKB/TrEMBL;Acc:G4MYL9]	uncharacterized protein	protein_coding	GO:0046872(metal ion binding); GO:0008270(zinc ion binding); GO:0005575(cellular_component); GO:0016020(membrane); GO:0016021(integral component of membrane)	NA	NA	NA	29.8357	36.3485	46.5173	53.0187	54.3678	93.2737	52.2269	1.80404	0.851235	0.358463	2.37468	0.0175642	0.21518	none
2679347	MGG_01707	MGG_01707T0	Putative uncharacterized protein [Source:UniProtKB/TrEMBL;Acc:G4MUW5]	uncharacterized protein	protein_coding	GO:0008270(zinc ion binding); GO:0030437(ascospore formation); GO:0009405(pathogenesis); GO:0004089(carbonate dehydratase activity); GO:0003674(molecular_function); GO:0005575(cellular_component)	NA	K17981	NA	62.9143	46.7337	39.2678	83.6065	94.3441	70.524	66.2318	1.66289	0.733689	0.309041	2.37408	0.0175926	0.21518	none
2676479	MGG_03347	MGG_03347T0	Putative uncharacterized protein [Source:UniProtKB/TrEMBL;Acc:G4N8Z2]	uncharacterized protein	protein_coding	GO:0003674(molecular_function); GO:0008150(biological_process); GO:0005575(cellular_component)	NA	NA	NA	66.806	94.1166	75.5151	97.8808	126.325	143.323	100.661	1.56714	0.648133	0.272748	2.3763	0.0174871	0.21518	none
5050881	MGG_12275	MGG_12275T0	Putative uncharacterized protein [Source:UniProtKB/TrEMBL;Acc:G4MY98]	uncharacterized protein	protein_coding	GO:0016491(oxidoreductase activity); GO:0055114(oxidation-reduction process)	NA	NA	NA	751.081	546.525	638.556	538.344	378.975	433.382	547.81	0.696168	-0.522492	0.219857	-2.37651	0.0174772	0.21518	none
2682791	MGG_02660	MGG_02660T0	Nascent polypeptide-associated complex subunit alpha [Source:UniProtKB/Swiss-Prot;Acc:A4RC89]	nascent polypeptide-associated complex subunit alpha	protein_coding	GO:0003674(molecular_function); GO:0008150(biological_process); GO:0005575(cellular_component); GO:0005634(nucleus); GO:0005737(cytoplasm); GO:0015031(protein transport); GO:0005854(nascent polypeptide-associated complex)	NA	K03626	NA	712.813	678.288	836.707	646.421	401.362	491.393	627.831	0.689285	-0.536828	0.226211	-2.37312	0.0176383	0.21518	none
2680511	MGG_09468	NA	NA	uncharacterized protein	NA	NA	NA	NA	NA	53.8339	40.892	48.9338	24.4702	23.9858	29.5746	36.9484	0.548547	-0.866314	0.36509	-2.37288	0.0176501	0.21518	none
2676376	MGG_10860	MGG_10860T0	Sterol 24-C-methyltransferase [Source:UniProtKB/TrEMBL;Acc:G4N2X7]	sterol 24-C-methyltransferase	protein_coding	GO:0008152(metabolic process); GO:0005741(mitochondrial outer membrane); GO:0032259(methylation); GO:0003838(sterol 24-C-methyltransferase activity); GO:0005811(lipid droplet); GO:0016740(transferase activity); GO:0008168(methyltransferase activity); GO:0006694(steroid biosynthetic process); GO:0006629(lipid metabolic process); GO:0008202(steroid metabolic process); GO:0016126(sterol biosynthetic…	00100(Steroid biosynthesis)	K00559	ec:2.1.1.41	16.215	18.1742	16.9154	36.7053	31.981	30.7121	25.1172	1.92458	0.944546	0.39828	2.37157	0.0177129	0.215298	none
2684815	MGG_06642	MGG_06642T0	Phosphoglycerate mutase family domain-containing protein [Source:UniProtKB/TrEMBL;Acc:G4MKP2]	phosphoglycerate mutase family domain-containing protein	protein_coding	GO:0005575(cellular_component)	NA	NA	NA	66.806	55.8209	48.9338	89.724	103.938	79.6239	74.1412	1.58854	0.667706	0.281548	2.37155	0.0177134	0.215298	none
2681196	MGG_02105	MGG_02105T0	Putative uncharacterized protein [Source:UniProtKB/TrEMBL;Acc:G4MNP7]	uncharacterized protein	protein_coding	GO:0008150(biological_process); GO:0005575(cellular_component)	NA	NA	NA	101.182	81.784	81.5563	42.8228	43.1744	69.3865	69.9843	0.598481	-0.740624	0.312385	-2.37087	0.0177463	0.215395	none
12986898	MGG_16539	MGG_16539T0	Putative uncharacterized protein [Source:UniProtKB/TrEMBL;Acc:G4MKZ4]	uncharacterized protein	protein_coding	GO:0003676(nucleic acid binding); GO:0006139(nucleobase-containing compound metabolic process); GO:0008408(3'-5' exonuclease activity); GO:0005622(intracellular); GO:0090305(nucleic acid phosphodiester bond hydrolysis)	NA	K18740	NA	2.59441	3.89448	4.22884	6.11755	12.7924	15.9248	7.59208	3.33703	1.73857	0.733818	2.36921	0.0178263	0.216063	none
2683721	MGG_07794	NA	NA	uncharacterized protein	NA	NA	NA	NA	NA	7.13462	14.2798	12.6865	18.3526	31.981	26.1621	18.4328	2.26128	1.17714	0.497086	2.36808	0.0178808	0.216073	none
2678052	MGG_04825	MGG_04825T0	Endopolyphosphatase [Source:UniProtKB/TrEMBL;Acc:G4MU66]	endopolyphosphatase	protein_coding	GO:0016021(integral component of membrane); GO:0005774(vacuolar membrane); GO:0043581(obsolete mycelium development); GO:0016787(hydrolase activity); GO:0005773(vacuole); GO:0016020(membrane); GO:0000298(endopolyphosphatase activity); GO:0008150(biological_process)	NA	K06018	ec:3.6.1.10	66.806	44.1374	52.5585	91.7632	110.335	70.524	72.6873	1.65774	0.729222	0.307889	2.36845	0.0178626	0.216073	none
2678116	MGG_04446	MGG_04446T0	Thermosensitive gluconokinase [Source:UniProtKB/TrEMBL;Acc:G4MSC2]	thermosensitive gluconokinase	protein_coding	GO:0005975(carbohydrate metabolic process); GO:0016301(kinase activity); GO:0016310(phosphorylation); GO:0005575(cellular_component); GO:0000166(nucleotide binding); GO:0005524(ATP binding); GO:0016740(transferase activity); GO:0046316(gluconokinase activity); GO:0046177(D-gluconate catabolic process)	00030(Pentose phosphate pathway)	K00851	ec:2.7.1.12	66.1574	64.2589	59.8079	95.8416	110.335	86.4488	80.4749	1.53369	0.617009	0.260601	2.36764	0.017902	0.216073	none
12984569	MGG_17119	NA	NA	uncharacterized protein	NA	NA	NA	NA	NA	19.458	18.8233	24.7689	40.7836	43.1744	34.1245	30.1888	1.85831	0.893989	0.377886	2.36576	0.017993	0.216549	none
2682643	MGG_03090	MGG_03090T0	Putative uncharacterized protein [Source:UniProtKB/TrEMBL;Acc:G5EHK2]	uncharacterized protein	protein_coding	GO:0016021(integral component of membrane); GO:0016020(membrane); GO:0003674(molecular_function); GO:0008150(biological_process)	00600(Sphingolipid metabolism)	K04709	ec:2.3.1.297	167.339	186.286	212.65	152.939	118.33	116.023	158.928	0.678763	-0.55902	0.236279	-2.36593	0.0179847	0.216549	none
12984240	MGG_16744	MGG_16744T0	Putative uncharacterized protein [Source:UniProtKB/TrEMBL;Acc:G4N4W8]	uncharacterized protein	protein_coding	GO:0005829(cytosol); GO:0005634(nucleus); GO:0006364(rRNA processing); GO:0005819(spindle); GO:0005732(small nucleolar ribonucleoprotein complex); GO:0005816(spindle pole body); GO:0032040(small-subunit processome); GO:0000935(division septum); GO:0003674(molecular_function); GO:0005515(protein binding)	03008(Ribosome biogenesis in eukaryotes)	K14554	NA	94.6958	78.5387	96.6593	69.3322	51.1697	50.0493	73.4075	0.623919	-0.68057	0.287734	-2.36528	0.0180165	0.216549	none
2679920	MGG_11310	NA	NA	uncharacterized protein	NA	NA	NA	NA	NA	105.722	106.449	76.1192	59.1363	52.7687	65.9741	77.6949	0.620239	-0.689103	0.29141	-2.36472	0.0180435	0.216572	none
2677832	MGG_04435	MGG_04435T0	Bifunctional purine biosynthesis protein ADE17 [Source:UniProtKB/TrEMBL;Acc:G4MSB1]	bifunctional purine biosynthesis protein ADE17	protein_coding	GO:0005829(cytosol); GO:0030437(ascospore formation); GO:0003824(catalytic activity); GO:0009060(aerobic respiration); GO:0004643(phosphoribosylaminoimidazolecarboxamide formyltransferase activity); GO:0003937(IMP cyclohydrolase activity); GO:0006189('de novo' IMP biosynthetic process); GO:0006164(purine nucleotide biosynthetic process); GO:0005575(cellular_component); GO:0016740(transferase acti…	00230(Purine metabolism); 00670(One carbon pool by folate)	K00602	ec:2.1.2.3	166.691	181.093	194.527	122.351	123.127	133.086	153.479	0.699789	-0.515007	0.218108	-2.36125	0.0182137	0.218312	none
5051534	MGG_13133	MGG_13133T0	Putative uncharacterized protein [Source:UniProtKB/TrEMBL;Acc:G4MN61]	uncharacterized protein	protein_coding	GO:0003674(molecular_function); GO:0008150(biological_process); GO:0005575(cellular_component)	NA	NA	NA	15.5664	7.13988	8.45769	32.6269	17.5896	23.8872	17.5446	2.3576	1.23732	0.524752	2.35792	0.0183779	0.219671	none
2680030	MGG_09079	MGG_09079T0	Putative uncharacterized protein [Source:UniProtKB/TrEMBL;Acc:G4MZT0]	uncharacterized protein	protein_coding	GO:0003674(molecular_function); GO:0008150(biological_process); GO:0005575(cellular_component)	NA	NA	NA	47.3479	81.135	55.5791	61.1755	139.118	127.398	85.2922	1.79592	0.844722	0.358197	2.35826	0.0183609	0.219671	none
2674162	MGG_00433	MGG_00433T0	Putative uncharacterized protein [Source:UniProtKB/TrEMBL;Acc:G4NCA5]	uncharacterized protein	protein_coding	GO:0003674(molecular_function); GO:0008150(biological_process); GO:0005575(cellular_component)	NA	NA	NA	11.0262	6.4908	3.0206	8.15673	41.5754	14.7873	14.1762	3.16643	1.66286	0.705743	2.35618	0.0184642	0.219792	none
12984562	MGG_16195	MGG_16195T0	Putative uncharacterized protein [Source:UniProtKB/TrEMBL;Acc:G4MMK3]	uncharacterized protein	protein_coding	NA	NA	NA	NA	50.5909	51.9264	54.3709	83.6065	84.7498	76.2114	66.9093	1.5536	0.635611	0.269722	2.35654	0.0184462	0.219792	none
2680228	MGG_09313	MGG_09313T0	Ribosome biogenesis protein ERB1 [Source:UniProtKB/Swiss-Prot;Acc:A4R0Q1]	ribosome biogenesis protein ERB1	protein_coding	GO:0003674(molecular_function); GO:0005575(cellular_component); GO:0005634(nucleus); GO:0005654(nucleoplasm); GO:0005730(nucleolus); GO:0006364(rRNA processing); GO:0042254(ribosome biogenesis); GO:0042273(ribosomal large subunit biogenesis); GO:0043021(ribonucleoprotein complex binding); GO:0000463(maturation of LSU-rRNA from tricistronic rRNA transcript (SSU-rRNA, 5.8S rRNA, LSU-rRNA)); GO:0000…	NA	K14824	NA	81.0752	84.3804	122.032	50.9796	52.7687	68.2491	76.5809	0.603948	-0.727503	0.30866	-2.35697	0.0184247	0.219792	none
2679438	MGG_01272	MGG_01272T0	CORD and CS domain-containing protein [Source:UniProtKB/TrEMBL;Acc:G4MY47]	CORD and CS domain-containing protein	protein_coding	GO:0003674(molecular_function); GO:0008150(biological_process); GO:0005575(cellular_component); GO:0046872(metal ion binding)	NA	NA	NA	44.7535	44.7865	27.1854	95.8416	55.9668	59.1492	54.6138	1.78892	0.839089	0.356619	2.3529	0.0186277	0.221434	none
12986728	MGG_15094	MGG_15094T0	Acetylcholinesterase [Source:UniProtKB/TrEMBL;Acc:G4MVW5]	acetylcholinesterase	protein_coding	GO:0016787(hydrolase activity); GO:0008150(biological_process); GO:0005575(cellular_component)	NA	NA	NA	43.4563	35.0503	56.7873	36.7053	17.5896	13.6498	33.8731	0.482163	-1.05241	0.447925	-2.34952	0.0187978	0.222844	none
2676823	MGG_03474	MGG_03474T0	Putative uncharacterized protein [Source:UniProtKB/TrEMBL;Acc:G4N884]	uncharacterized protein	protein_coding	GO:0003674(molecular_function); GO:0008150(biological_process); GO:0005575(cellular_component)	NA	NA	NA	7.13462	20.1215	14.4989	0	6.39621	3.41245	8.59394	0.246758	-2.01883	0.859077	-2.35	0.0187735	0.222844	none
2677574	MGG_04239	MGG_04239T0	Putative uncharacterized protein [Source:UniProtKB/TrEMBL;Acc:G4NFB4]	uncharacterized protein	protein_coding	GO:0008270(zinc ion binding); GO:0000166(nucleotide binding); GO:0016491(oxidoreductase activity); GO:0055114(oxidation-reduction process)	NA	NA	NA	6.48602	3.89448	1.81236	18.3526	7.99526	13.6498	8.69843	3.26567	1.70738	0.727825	2.34587	0.018983	0.22379	none
2679942	MGG_08957	NA	NA	uncharacterized protein	NA	NA	NA	NA	NA	18.8094	14.9288	47.7255	87.6848	44.7735	48.9118	43.8057	2.20058	1.13788	0.485156	2.3454	0.0190069	0.22379	none
2675781	MGG_11021	MGG_11021T0	Putative uncharacterized protein [Source:UniProtKB/TrEMBL;Acc:G4N280]	uncharacterized protein	protein_coding	GO:0005524(ATP binding); GO:0043581(obsolete mycelium development); GO:0000166(nucleotide binding); GO:0017111(nucleoside-triphosphatase activity)	NA	NA	NA	130.369	112.94	264.605	203.918	367.782	331.008	235.104	1.78031	0.832131	0.354554	2.34698	0.0189262	0.22379	none
2681027	MGG_10004	NA	NA	uncharacterized protein	NA	NA	NA	NA	NA	86.9126	133.061	189.09	285.486	196.683	202.472	182.284	1.66722	0.737446	0.314246	2.34671	0.0189398	0.22379	none
2674458	MGG_00919	MGG_00919T0	GMP synthase [Source:UniProtKB/TrEMBL;Acc:G4NDG8]	GMP synthase	protein_coding	GO:0005524(ATP binding); GO:0043581(obsolete mycelium development); GO:0003922(GMP synthase (glutamine-hydrolyzing) activity); GO:0006177(GMP biosynthetic process); GO:0006164(purine nucleotide biosynthetic process); GO:0016462(pyrophosphatase activity); GO:0005575(cellular_component); GO:0000166(nucleotide binding); GO:0006541(glutamine metabolic process)	00230(Purine metabolism)	K01951	ec:6.3.5.2	173.177	166.813	226.545	161.095	107.137	101.236	156.001	0.645257	-0.632054	0.269413	-2.34604	0.0189742	0.22379	none
2676891	MGG_03372	MGG_03372T0	40S ribosomal protein S20 [Source:UniProtKB/TrEMBL;Acc:G4N8W1]	40S ribosomal protein S20	protein_coding	GO:0003723(RNA binding); GO:0043581(obsolete mycelium development); GO:0006412(translation); GO:0003735(structural constituent of ribosome); GO:0005840(ribosome); GO:0005622(intracellular); GO:0015935(small ribosomal subunit); GO:0000462(maturation of SSU-rRNA from tricistronic rRNA transcript (SSU-rRNA, 5.8S rRNA, LSU-rRNA)); GO:0022627(cytosolic small ribosomal subunit)	03010(Ribosome)	K02969	NA	1309.53	1305.95	1508.49	1211.27	590.05	894.063	1136.56	0.652834	-0.615212	0.262369	-2.34484	0.0190353	0.22382	none
2676518	MGG_13563	NA	NA	uncharacterized protein	NA	NA	NA	K09983	NA	160.205	170.059	127.469	63.2147	121.528	100.099	123.762	0.627883	-0.671433	0.286606	-2.3427	0.0191446	0.2248	none
12985606	MGG_17186	NA	NA	uncharacterized protein, partial	NA	NA	NA	NA	NA	2502.95	2735.87	3050.21	2457.21	1096.95	1715.33	2259.75	0.635317	-0.654452	0.279491	-2.34158	0.0192022	0.225171	none
2677770	MGG_04548	MGG_04548T0	4-coumarate-CoA ligase [Source:UniProtKB/TrEMBL;Acc:G4MS65]	4-coumarate-CoA ligase	protein_coding	GO:0008152(metabolic process); GO:0003824(catalytic activity); GO:0016874(ligase activity); GO:0005575(cellular_component)	NA	NA	NA	145.935	142.798	128.074	136.625	246.254	265.034	177.453	1.56586	0.646957	0.276557	2.33932	0.0193187	0.22623	none
2674367	MGG_00464	MGG_00464T0	MFS phospholipid transporter Git1 [Source:UniProtKB/TrEMBL;Acc:G4NC14]	MFS phospholipid transporter Git1	protein_coding	GO:0016021(integral component of membrane); GO:0055085(transmembrane transport); GO:0022857(transmembrane transporter activity); GO:0016020(membrane)	NA	NA	NA	18.1608	10.3853	14.4989	26.5094	27.1839	34.1245	21.8105	2.05883	1.04182	0.445739	2.3373	0.0194238	0.226847	none
2679824	MGG_08838	NA	NA	uncharacterized protein	NA	NA	NA	NA	NA	58.3741	60.3644	52.5585	18.3526	27.1839	44.3619	43.5326	0.543308	-0.880157	0.376498	-2.33774	0.0194006	0.226847	none
2679375	MGG_01335	MGG_01335T0	Carboxy-cis,cis-muconate cyclase [Source:UniProtKB/TrEMBL;Acc:G4MYM9]	carboxy-cis,cis-muconate cyclase	protein_coding	GO:0008150(biological_process); GO:0005575(cellular_component); GO:0005515(protein binding)	NA	K14334	ec:5.5.1.5	28.5385	36.3485	43.4967	18.3526	22.3867	13.6498	27.1288	0.494076	-1.0172	0.435346	-2.33652	0.0194639	0.227009	none
5050863	MGG_14758	MGG_14758T0	Putative uncharacterized protein [Source:UniProtKB/TrEMBL;Acc:G4MV81]	uncharacterized protein	protein_coding	NA	NA	NA	NA	5.18881	9.08712	6.04121	24.4702	22.3867	9.09987	12.7123	2.6837	1.42422	0.610221	2.33395	0.0195985	0.228271	none
2681337	MGG_02240	MGG_02240T0	Putative uncharacterized protein [Source:UniProtKB/TrEMBL;Acc:G4MPP9]	uncharacterized protein	protein_coding	GO:0030437(ascospore formation); GO:0009405(pathogenesis); GO:0016575(histone deacetylation)	NA	NA	NA	62.2657	49.3301	63.4327	77.4889	118.33	84.1738	75.8369	1.60089	0.678872	0.290991	2.33297	0.0196498	0.228561	none
2680968	MGG_10011	MGG_10011T0	Polyketide synthase [Source:UniProtKB/TrEMBL;Acc:G4N9D3]	polyketide synthase	protein_coding	GO:0000166(nucleotide binding); GO:0008152(metabolic process); GO:0016740(transferase activity); GO:0003824(catalytic activity); GO:0009058(biosynthetic process); GO:0048037(obsolete cofactor binding); GO:0031177(phosphopantetheine binding)	NA	NA	NA	38.9161	27.2613	41.0802	48.9404	68.7593	64.8366	48.299	1.71271	0.776278	0.332863	2.33212	0.0196941	0.228769	none
2677128	MGG_04204	MGG_04204T0	Guanine nucleotide-binding protein alpha-2 subunit [Source:UniProtKB/TrEMBL;Acc:G4NF72]	guanine nucleotide-binding protein alpha-2 subunit	protein_coding	GO:0000166(nucleotide binding); GO:0005525(GTP binding); GO:0007189(adenylate cyclase-activating G protein-coupled receptor signaling pathway); GO:0004871(obsolete signal transducer activity); GO:0003924(GTPase activity); GO:0007186(G protein-coupled receptor signaling pathway); GO:0007165(signal transduction); GO:0005834(heterotrimeric G-protein complex); GO:0001664(G protein-coupled receptor bi…	NA	K04640	NA	107.668	106.449	107.533	73.4106	67.1602	73.9365	89.3596	0.667307	-0.583577	0.250324	-2.33128	0.0197385	0.228977	none
5051439	MGG_13026	NA	NA	uncharacterized protein	NA	NA	NA	NA	NA	31.1329	51.9264	40.4761	73.4106	65.5611	68.2491	55.126	1.67431	0.743569	0.319181	2.32961	0.0198266	0.229691	none
2676852	MGG_03263	MGG_03263T0	Betaine aldehyde dehydrogenase [Source:UniProtKB/TrEMBL;Acc:G4N9J6]	betaine aldehyde dehydrogenase	protein_coding	GO:0008152(metabolic process); GO:0016491(oxidoreductase activity); GO:0055114(oxidation-reduction process); GO:0016620(oxidoreductase activity, acting on the aldehyde or oxo group of donors, NAD or NADP as acceptor); GO:0005575(cellular_component); GO:0005975(carbohydrate metabolic process)	NA	NA	NA	145.935	109.045	114.179	93.8024	79.9526	67.1116	101.671	0.645794	-0.630854	0.270902	-2.32872	0.019874	0.229932	none
2674765	MGG_01134	MGG_01134T0	Cell wall glucanase [Source:UniProtKB/TrEMBL;Acc:G4NC59]	cell wall glucanase	protein_coding	GO:0005975(carbohydrate metabolic process); GO:0004553(hydrolase activity, hydrolyzing O-glycosyl compounds); GO:0071555(cell wall organization); GO:0005618(cell wall); GO:0016798(hydrolase activity, acting on glycosyl bonds); GO:0005575(cellular_component)	NA	NA	NA	361.92	352.45	330.454	483.286	446.136	451.581	404.305	1.3206	0.401197	0.172696	2.32313	0.0201719	0.232757	none
5050936	MGG_12339	NA	NA	uncharacterized protein	NA	NA	NA	NA	NA	46.0507	40.2429	40.4761	30.5877	20.7877	18.1997	32.7242	0.535073	-0.902192	0.3883	-2.32344	0.0201556	0.232757	none
2684143	MGG_05832	MGG_05832T0	Putative uncharacterized protein [Source:UniProtKB/TrEMBL;Acc:G4N3M8]	uncharacterized protein	protein_coding	NA	NA	NA	NA	8.43182	14.2798	19.936	48.9404	19.1886	29.5746	23.3919	2.25388	1.17241	0.505467	2.31946	0.02037	0.233874	none
2676654	MGG_03327	MGG_03327T0	Putative uncharacterized protein [Source:UniProtKB/TrEMBL;Acc:G4N965]	uncharacterized protein	protein_coding	GO:0003674(molecular_function); GO:0008150(biological_process); GO:0005575(cellular_component); GO:0016020(membrane); GO:0016021(integral component of membrane)	NA	NA	NA	83.6696	132.412	128.074	101.959	329.405	201.335	162.809	1.84369	0.882594	0.380329	2.32061	0.0203082	0.233874	none
2679167	MGG_01693	MGG_01693T0	Putative uncharacterized protein [Source:UniProtKB/TrEMBL;Acc:G4MUU7]	uncharacterized protein	protein_coding	GO:0003674(molecular_function); GO:0008150(biological_process); GO:0005575(cellular_component); GO:0005737(cytoplasm); GO:0005783(endoplasmic reticulum)	NA	NA	NA	25.2955	24.665	27.7896	38.7445	65.5611	37.537	36.5988	1.81966	0.863665	0.372376	2.31934	0.0203768	0.233874	none
2683052	MGG_07038	NA	NA	uncharacterized protein	NA	NA	NA	K19305	ec:3.4.24.39	47.3479	59.0663	49.5379	46.9012	17.5896	17.0623	39.5842	0.502743	-0.992106	0.42775	-2.31936	0.0203757	0.233874	none
2677789	MGG_04795	MGG_04795T0	Biotrophy-associated secreted protein 1 [Source:UniProtKB/TrEMBL;Acc:G5EHI7]	uncharacterized protein	protein_coding	GO:0003674(molecular_function); GO:0008150(biological_process); GO:0005575(cellular_component); GO:0005576(extracellular region); GO:0030430(host cell cytoplasm)	NA	NA	NA	94.6958	107.747	148.01	299.76	132.721	168.348	158.547	1.70344	0.768455	0.331906	2.31528	0.0205978	0.236097	none
2679008	MGG_08786	MGG_08786T0	Putative uncharacterized protein [Source:UniProtKB/TrEMBL;Acc:G4NFL3]	uncharacterized protein	protein_coding	GO:0016021(integral component of membrane); GO:0055085(transmembrane transport); GO:0016020(membrane); GO:0022857(transmembrane transporter activity)	NA	NA	NA	18.1608	12.9816	4.83297	24.4702	22.3867	38.6745	20.2511	2.41518	1.27213	0.549602	2.31464	0.0206326	0.236183	none
2678416	MGG_08180	NA	NA	SIS1	NA	NA	NA	K09510	NA	97.9388	90.8712	77.3274	191.683	151.91	93.2737	117.167	1.62497	0.70041	0.302853	2.3127	0.020739	0.237087	none
2684029	MGG_05946	MGG_05946T0	High-affinity glucose transporter [Source:UniProtKB/TrEMBL;Acc:G4N4A6]	high-affinity glucose transporter	protein_coding	GO:0016021(integral component of membrane); GO:0006810(transport); GO:0055085(transmembrane transport); GO:0008643(carbohydrate transport); GO:0016020(membrane); GO:0005215(transporter activity); GO:0022891(GO_0022891); GO:0022857(transmembrane transporter activity)	NA	NA	NA	60.3199	57.119	70.078	24.4702	31.981	47.7743	48.6238	0.570751	-0.809067	0.349934	-2.31206	0.0207746	0.237182	none
2676148	MGG_05343	MGG_05343T0	C6 zinc finger protein [Source:UniProtKB/TrEMBL;Acc:G4MKH9]	C6 zinc finger protein	protein_coding	GO:0046872(metal ion binding); GO:0008270(zinc ion binding); GO:0003677(DNA binding); GO:0005634(nucleus); GO:0006355(regulation of transcription, DNA-templated); GO:0006351(transcription, DNA-templated); GO:0003700(DNA-binding transcription factor activity); GO:0000981(DNA-binding transcription factor activity, RNA polymerase II-specific); GO:0006357(regulation of transcription by RNA polymerase…	NA	NA	NA	200.418	236.914	220.504	277.329	302.221	316.221	258.934	1.3648	0.448684	0.194116	2.31142	0.0208096	0.237268	none
2682337	MGG_02597	MGG_02597T0	YjeF [Source:UniProtKB/TrEMBL;Acc:G4NJP2]	YjeF	protein_coding	GO:0046872(metal ion binding); GO:0005739(mitochondrion); GO:0000166(nucleotide binding); GO:0046496(nicotinamide nucleotide metabolic process); GO:0052856(NADHX epimerase activity); GO:0005737(cytoplasm); GO:0016853(isomerase activity); GO:0052857(NADPHX epimerase activity)	NA	K17759	ec:5.1.99.6	90.8042	96.0638	79.1398	57.0971	55.9668	58.0117	72.8472	0.643876	-0.635146	0.27505	-2.3092	0.0209324	0.238354	none
2674748	MGG_00758	MGG_00758T0	Geranylgeranyl pyrophosphate synthase [Source:UniProtKB/TrEMBL;Acc:G4NEM8]	geranylgeranyl pyrophosphate synthase	protein_coding	GO:0016740(transferase activity); GO:0008299(isoprenoid biosynthetic process); GO:0003674(molecular_function); GO:0005575(cellular_component)	00900(Terpenoid backbone biosynthesis)	K00804	ec:2.5.1.1	77.1836	65.5571	77.9316	101.959	127.924	102.374	92.1548	1.50473	0.5895	0.255338	2.3087	0.0209602	0.238356	none
2675008	MGG_00856	MGG_00856T0	Putative uncharacterized protein [Source:UniProtKB/TrEMBL;Acc:G4NE01]	uncharacterized protein	protein_coding	GO:0005634(nucleus); GO:0006357(regulation of transcription by RNA polymerase II); GO:0003700(DNA-binding transcription factor activity)	NA	NA	NA	136.855	98.6601	98.4717	124.39	238.259	169.485	144.353	1.59859	0.676804	0.293536	2.30569	0.0211278	0.239633	none
2675426	MGG_04847	MGG_04847T0	Peptidase M14 [Source:UniProtKB/TrEMBL;Acc:G4N2A5]	peptidase M14	protein_coding	GO:0008270(zinc ion binding); GO:0006508(proteolysis); GO:0044271(cellular nitrogen compound biosynthetic process); GO:0004181(metallocarboxypeptidase activity); GO:0005575(cellular_component)	NA	NA	NA	376.189	427.744	334.683	195.762	235.061	331.008	316.741	0.673728	-0.569762	0.247095	-2.30584	0.0211194	0.239633	none
2681302	MGG_02232	MGG_02232T0	Putative uncharacterized protein [Source:UniProtKB/TrEMBL;Acc:G4MPN7]	uncharacterized protein	protein_coding	GO:0003674(molecular_function); GO:0008150(biological_process); GO:0005575(cellular_component)	NA	NA	NA	9.72902	11.0344	51.3503	124.39	30.382	50.0493	46.1558	2.8114	1.49129	0.646933	2.30517	0.0211572	0.239653	none
2684551	MGG_06396	MGG_06396T0	Putative uncharacterized protein [Source:UniProtKB/TrEMBL;Acc:G4N7J9]	uncharacterized protein	protein_coding	GO:0003723(RNA binding); GO:0016070(RNA metabolic process); GO:0005515(protein binding)	NA	K03260	NA	609.685	543.28	682.052	540.383	385.372	373.095	522.311	0.705132	-0.504034	0.218774	-2.3039	0.0212282	0.239829	none
2675367	MGG_04972	MGG_04972T0	Putative uncharacterized protein [Source:UniProtKB/TrEMBL;Acc:G4N3I9]	uncharacterized protein	protein_coding	GO:0016020(membrane); GO:0016021(integral component of membrane); GO:0006629(lipid metabolic process); GO:0006631(fatty acid metabolic process); GO:0006633(fatty acid biosynthetic process); GO:0005783(endoplasmic reticulum); GO:0005789(endoplasmic reticulum membrane); GO:0016829(lyase activity); GO:0102344(3-hydroxy-behenoyl-CoA dehydratase activity); GO:0102345(3-hydroxy-lignoceroyl-CoA dehydrat…	00062(Fatty acid elongation); 01040(Biosynthesis of unsaturated fatty acids); 01212(Fatty acid metabolism)	K10703	ec:4.2.1.134	66.806	68.8025	48.3297	32.6269	43.1744	30.7121	48.4086	0.577449	-0.792235	0.343853	-2.30399	0.0212231	0.239829	none
2684920	MGG_06747	NA	NA	glutathione S-transferase	NA	NA	00480(Glutathione metabolism)	K00799	ec:2.5.1.18	103.128	100.607	115.991	87.6848	55.9668	64.8366	88.0357	0.645018	-0.63259	0.274635	-2.30339	0.0212571	0.239843	none
2675724	MGG_05056	MGG_05056T0	Zinc-regulated transporter 2 [Source:UniProtKB/TrEMBL;Acc:G4N442]	zinc-regulated transporter 2	protein_coding	GO:0016021(integral component of membrane); GO:0043581(obsolete mycelium development); GO:0055085(transmembrane transport); GO:0016020(membrane); GO:0030001(metal ion transport); GO:0005385(zinc ion transmembrane transporter activity); GO:0046873(metal ion transmembrane transporter activity); GO:0006811(ion transport); GO:0071577(zinc ion transmembrane transport); GO:0000007(low-affinity zinc ion…	NA	K14709	NA	14.9178	20.7706	19.3319	61.1755	25.5848	28.4371	28.3696	2.04722	1.03367	0.449496	2.29962	0.0214698	0.24062	none
2678813	MGG_08476	NA	NA	uncharacterized protein	NA	NA	NA	NA	NA	35.6731	40.892	35.6431	114.194	51.1697	46.6369	54.0348	1.85537	0.891704	0.387828	2.29923	0.0214921	0.24062	none
2676130	MGG_05695	MGG_05695T0	Putative uncharacterized protein [Source:UniProtKB/TrEMBL;Acc:G4MP34]	uncharacterized protein	protein_coding	NA	NA	NA	NA	47.9965	33.7521	38.0596	44.862	92.745	69.3865	54.467	1.74136	0.800218	0.347781	2.30093	0.0213957	0.24062	none
2683016	MGG_07270	NA	NA	fatty aldehyde dehydrogenase	NA	NA	00906(Carotenoid biosynthesis)	K17819	ec:1.2.1.82	143.341	161.621	125.657	152.939	267.042	229.772	180.062	1.5163	0.600558	0.261002	2.30097	0.0213932	0.24062	none
5049118	MGG_13253	MGG_13253T0	Putative uncharacterized protein [Source:UniProtKB/TrEMBL;Acc:G4N485]	uncharacterized protein	protein_coding	GO:0050660(flavin adenine dinucleotide binding); GO:0006066(alcohol metabolic process); GO:0055114(oxidation-reduction process); GO:0016614(oxidoreductase activity, acting on CH-OH group of donors); GO:0008812(choline dehydrogenase activity)	NA	NA	NA	124.531	109.045	101.492	128.468	185.49	177.448	137.746	1.47559	0.561291	0.244175	2.29872	0.0215206	0.24062	none
2683170	MGG_07187	NA	NA	glutamate synthase	NA	NA	00250(Alanine, aspartate and glutamate metabolism); 00910(Nitrogen metabolism); 01230(Biosynthesis of amino acids)	K00264	ec:1.4.1.14	354.785	382.957	452.486	740.223	466.923	523.243	486.77	1.45012	0.536171	0.233216	2.29903	0.0215031	0.24062	none
2678222	MGG_04390	MGG_04390T0	Putative uncharacterized protein [Source:UniProtKB/TrEMBL;Acc:G4MZE3]	uncharacterized protein	protein_coding	NA	NA	NA	NA	23.3497	24.665	27.1854	16.3135	7.99526	10.2374	18.291	0.447218	-1.16095	0.504749	-2.30005	0.0214453	0.24062	none
12985801	MGG_15142	MGG_15142T0	Putative uncharacterized protein [Source:UniProtKB/TrEMBL;Acc:G4N055]	uncharacterized protein	protein_coding	NA	NA	NA	NA	34.3759	3.89448	0	0	1.59905	1.13748	6.83448	0.0764768	-3.70883	1.6138	-2.29819	0.0215508	0.240646	none
2676984	MGG_03383	MGG_03383T0	Putative uncharacterized protein [Source:UniProtKB/TrEMBL;Acc:G4N8U9]	uncharacterized protein	protein_coding	GO:0003674(molecular_function); GO:0008150(biological_process); GO:0005575(cellular_component)	NA	NA	NA	3.24301	4.54356	4.22884	10.1959	9.59431	15.9248	7.95507	3.02656	1.59768	0.69557	2.29693	0.0216225	0.241136	none
2674729	MGG_01093	MGG_01093T0	Putative uncharacterized protein [Source:UniProtKB/TrEMBL;Acc:G4NCG0]	uncharacterized protein	protein_coding	GO:0016020(membrane); GO:0016021(integral component of membrane)	NA	K22386	NA	49.9423	53.2245	42.8926	20.3918	38.3773	20.4747	37.5505	0.541211	-0.885738	0.385883	-2.29535	0.021713	0.241833	none
2675489	MGG_05222	MGG_05222T0	F-box/LRR-repeat protein 2 [Source:UniProtKB/TrEMBL;Acc:G4N5A9]	F-box/LRR-repeat protein 2	protein_coding	GO:0005575(cellular_component); GO:0005515(protein binding)	NA	K10268	NA	29.8357	28.5595	19.936	48.9404	51.1697	39.8119	36.3755	1.77685	0.829324	0.361599	2.29349	0.0218198	0.242108	none
5050670	MGG_11513	NA	NA	heat shock protein SSB1	NA	NA	03040(Spliceosome); 04141(Protein processing in endoplasmic reticulum); 04144(Endocytosis)	K03283	NA	1867.97	1814.18	2316.2	1751.66	961.03	1341.09	1675.36	0.675298	-0.566403	0.246964	-2.29346	0.0218216	0.242108	none
2685125	MGG_06952	NA	NA	ribosomal protein L38e	NA	NA	03010(Ribosome)	K02923	NA	685.572	807.455	975.051	723.91	283.032	492.531	661.258	0.60639	-0.721682	0.314645	-2.29364	0.0218113	0.242108	none
2676901	MGG_03118	MGG_03118T0	Putative uncharacterized protein [Source:UniProtKB/TrEMBL;Acc:G4N5Z0]	uncharacterized protein	protein_coding	GO:0016021(integral component of membrane); GO:0055085(transmembrane transport); GO:0016020(membrane); GO:0022857(transmembrane transporter activity)	NA	NA	NA	33.7273	39.5939	33.8308	55.0579	59.1649	60.2867	46.9436	1.63418	0.708566	0.3096	2.28865	0.0220996	0.243321	none
2678047	MGG_04358	MGG_04358T0	Putative uncharacterized protein [Source:UniProtKB/TrEMBL;Acc:G4MZ01]	uncharacterized protein	protein_coding	GO:0003674(molecular_function); GO:0005575(cellular_component)	04141(Protein processing in endoplasmic reticulum)	K13993	NA	42.1591	35.0503	36.8514	63.2147	67.1602	55.7367	50.0287	1.62476	0.700225	0.30579	2.28989	0.0220276	0.243321	none
2675807	MGG_05531	MGG_05531T0	Putative uncharacterized protein [Source:UniProtKB/TrEMBL;Acc:G4MML4]	uncharacterized protein	protein_coding	GO:0003674(molecular_function); GO:0008150(biological_process); GO:0005575(cellular_component); GO:0016020(membrane); GO:0031225(anchored component of membrane); GO:0005618(cell wall)	NA	NA	NA	129.72	163.568	132.302	307.917	182.292	175.173	181.829	1.55257	0.634662	0.277113	2.29026	0.0220062	0.243321	none
5050822	MGG_11657	MGG_11657T0	Putative uncharacterized protein [Source:UniProtKB/TrEMBL;Acc:G4NE76]	uncharacterized protein	protein_coding	GO:0003674(molecular_function); GO:0008150(biological_process); GO:0005575(cellular_component)	NA	NA	NA	79.778	57.7681	82.1604	132.547	108.736	100.099	93.5146	1.54275	0.625506	0.273074	2.29061	0.0219858	0.243321	none
2679752	MGG_01732	MGG_01732T0	3-carboxymuconate cyclase [Source:UniProtKB/TrEMBL;Acc:G4MVA2]	3-carboxymuconate cyclase	protein_coding	GO:0003674(molecular_function); GO:0008150(biological_process); GO:0005575(cellular_component); GO:0005515(protein binding)	NA	NA	NA	137.504	162.919	117.804	163.135	251.051	207.022	173.239	1.49041	0.575705	0.251446	2.28958	0.0220458	0.243321	none
2675469	MGG_05197	MGG_05197T0	Serine palmitoyltransferase 2 [Source:UniProtKB/TrEMBL;Acc:G4N522]	serine palmitoyltransferase 2	protein_coding	GO:0016740(transferase activity); GO:0030170(pyridoxal phosphate binding); GO:0003824(catalytic activity); GO:0030148(sphingolipid biosynthetic process); GO:0035339(SPOTS complex); GO:0004758(serine C-palmitoyltransferase activity); GO:0009058(biosynthetic process); GO:0005575(cellular_component); GO:0017059(serine C-palmitoyltransferase complex)	00600(Sphingolipid metabolism); 04138(Autophagy - yeast)	K00654	ec:2.3.1.50	229.605	222.634	205.401	150.899	150.311	170.623	188.246	0.72016	-0.473612	0.206926	-2.2888	0.022091	0.243321	none
2675380	MGG_04966	MGG_04966T0	Lysyl-tRNA synthetase [Source:UniProtKB/TrEMBL;Acc:G4N3I0]	lysyl-tRNA synthetase	protein_coding	GO:0003676(nucleic acid binding); GO:0005737(cytoplasm); GO:0005524(ATP binding); GO:0043581(obsolete mycelium development); GO:0000166(nucleotide binding); GO:0004824(lysine-tRNA ligase activity); GO:0006430(lysyl-tRNA aminoacylation); GO:0006418(tRNA aminoacylation for protein translation); GO:0004812(aminoacyl-tRNA ligase activity); GO:0016874(ligase activity)	00970(Aminoacyl-tRNA biosynthesis)	K04567	ec:6.1.1.6	304.843	340.118	372.742	230.428	212.674	282.096	290.483	0.715334	-0.483311	0.211245	-2.28792	0.0221421	0.243479	none
2675428	MGG_05101	MGG_05101T0	Putative uncharacterized protein [Source:UniProtKB/TrEMBL;Acc:G4N4F0]	uncharacterized protein	protein_coding	GO:0000166(nucleotide binding)	NA	NA	NA	12.3234	12.3325	7.85357	10.1959	33.5801	30.7121	17.8329	2.34631	1.23039	0.538676	2.28411	0.0223653	0.245621	none
12984811	MGG_17937	MGG_17937T0	Putative uncharacterized protein [Source:UniProtKB/TrEMBL;Acc:G5EHE4]	uncharacterized protein	protein_coding	NA	NA	NA	NA	4.54021	1.94724	3.0206	18.3526	14.3915	3.41245	7.61077	3.66783	1.87493	0.821959	2.28104	0.0225458	0.245869	none
12984190	MGG_15242	NA	NA	uncharacterized protein	NA	NA	NA	NA	NA	5.18881	12.9816	12.6865	16.3135	35.1792	21.6122	17.327	2.37678	1.24901	0.547994	2.27924	0.0226528	0.245869	none
2680779	MGG_09827	NA	NA	sugar transporter	NA	NA	NA	K08178	NA	7.78322	12.9816	9.06181	20.3918	19.1886	26.1621	15.9282	2.22805	1.15578	0.506331	2.28266	0.0224502	0.245869	none
2683580	MGG_07660	NA	NA	uncharacterized protein	NA	NA	NA	NA	NA	366.46	379.063	291.79	311.995	967.427	526.655	473.898	1.74288	0.801473	0.351554	2.2798	0.0226196	0.245869	none
2678029	MGG_13815	MGG_13815T0	Putative uncharacterized protein [Source:UniProtKB/TrEMBL;Acc:G4MSA9]	uncharacterized protein	protein_coding	GO:0016021(integral component of membrane); GO:0006810(transport); GO:0016020(membrane); GO:0045263(proton-transporting ATP synthase complex, coupling factor F(o)); GO:0015986(ATP synthesis coupled proton transport); GO:0008289(lipid binding); GO:0015991(GO_0015991); GO:0015992(GO_0015992); GO:0015078(proton transmembrane transporter activity); GO:0006811(ion transport); GO:0033177(proton-transpo…	00190(Oxidative phosphorylation)	K02128	NA	900.908	1207.29	836.707	1097.08	1645.42	1509.44	1199.47	1.44503	0.531098	0.232974	2.27965	0.0226287	0.245869	none
5049434	MGG_13669	MGG_13669T0	Peptide transporter PTR2 [Source:UniProtKB/TrEMBL;Acc:G4MMC7]	peptide transporter PTR2	protein_coding	GO:0016020(membrane); GO:0005215(transporter activity); GO:0006857(oligopeptide transport); GO:0016021(integral component of membrane); GO:0055085(transmembrane transport); GO:0022857(transmembrane transporter activity)	NA	K03305	NA	1612.42	1827.81	1485.53	1774.09	2500.92	2543.41	1957.36	1.38527	0.47017	0.206177	2.28042	0.022583	0.245869	none
2675733	MGG_04974	MGG_04974T0	Putative uncharacterized protein [Source:UniProtKB/TrEMBL;Acc:G4N3J1]	uncharacterized protein	protein_coding	GO:0003674(molecular_function); GO:0008150(biological_process); GO:0005575(cellular_component)	NA	NA	NA	390.458	318.049	360.056	462.894	462.126	501.631	415.869	1.33649	0.418444	0.183425	2.28127	0.0225322	0.245869	none
2675125	MGG_00349	MGG_00349T0	40S ribosomal protein S13 [Source:UniProtKB/TrEMBL;Acc:G4NCQ6]	40S ribosomal protein S13	protein_coding	GO:0043581(obsolete mycelium development); GO:0006412(translation); GO:0003735(structural constituent of ribosome); GO:0005840(ribosome); GO:0005622(intracellular); GO:0070181(small ribosomal subunit rRNA binding); GO:0000462(maturation of SSU-rRNA from tricistronic rRNA transcript (SSU-rRNA, 5.8S rRNA, LSU-rRNA)); GO:0022627(cytosolic small ribosomal subunit)	03010(Ribosome)	K02953	NA	777.025	660.763	839.728	621.951	460.527	573.292	655.548	0.726434	-0.461097	0.202016	-2.28248	0.0224612	0.245869	none
2683257	MGG_07135	MGG_07135T0	Orotate phosphoribosyltransferase [Source:UniProtKB/TrEMBL;Acc:G4MT58]	orotate phosphoribosyltransferase	protein_coding	GO:0005737(cytoplasm); GO:0005634(nucleus); GO:0016740(transferase activity); GO:0006207('de novo' pyrimidine nucleobase biosynthetic process); GO:0006221(pyrimidine nucleotide biosynthetic process); GO:0004588(orotate phosphoribosyltransferase activity); GO:0009116(nucleoside metabolic process); GO:0016757(transferase activity, transferring glycosyl groups); GO:0046132(pyrimidine ribonucleoside …	00240(Pyrimidine metabolism); 01240(Biosynthesis of cofactors)	K00762	ec:2.4.2.10	92.1014	92.8184	101.492	67.293	62.363	60.2867	79.3925	0.660114	-0.599213	0.262938	-2.27892	0.022672	0.245869	none
2682540	MGG_02987	MGG_02987T0	Para-nitrobenzyl esterase [Source:UniProtKB/TrEMBL;Acc:G5EHG6]	para-nitrobenzyl esterase	protein_coding	GO:0005575(cellular_component)	NA	NA	NA	131.018	94.7656	114.783	99.9199	60.764	48.9118	91.6936	0.603654	-0.728206	0.319353	-2.28025	0.0225926	0.245869	none
5051613	MGG_10897	MGG_10897T0	Putative uncharacterized protein [Source:UniProtKB/TrEMBL;Acc:G4MLX5]	uncharacterized protein	protein_coding	NA	NA	NA	NA	9.72902	12.3325	49.5379	95.8416	35.1792	53.4618	42.6803	2.55321	1.35231	0.593771	2.27749	0.0227568	0.24648	none
2679370	MGG_01330	MGG_01330T0	Putative uncharacterized protein [Source:UniProtKB/TrEMBL;Acc:G4MYM2]	uncharacterized protein, partial	protein_coding	NA	00564(Glycerophospholipid metabolism)	K13621	NA	8.43182	22.7178	3.62472	14.2743	182.292	31.8496	43.865	6.57658	2.71734	1.19358	2.27663	0.0228084	0.246729	none
2674643	MGG_00549	MGG_00549T0	3-hydroxyanthranilate 3,4-dioxygenase [Source:UniProtKB/Swiss-Prot;Acc:A4REV8]	3-hydroxyanthranilate 3,4-dioxygenase	protein_coding	GO:0005575(cellular_component); GO:0046872(metal ion binding); GO:0016491(oxidoreductase activity); GO:0055114(oxidation-reduction process); GO:0005737(cytoplasm); GO:0000334(3-hydroxyanthranilate 3,4-dioxygenase activity); GO:0005506(iron ion binding); GO:0051213(dioxygenase activity); GO:0006569(tryptophan catabolic process); GO:0019805(quinolinate biosynthetic process); GO:0043420(anthranilate…	00380(Tryptophan metabolism); 01240(Biosynthesis of cofactors)	K00452	ec:1.13.11.6	23.9983	26.6123	27.7896	50.9796	51.1697	36.3995	36.1581	1.74634	0.804331	0.353469	2.27553	0.0228739	0.246851	none
2676542	MGG_03715	MGG_03715T0	Putative uncharacterized protein [Source:UniProtKB/TrEMBL;Acc:G4N6H7]	uncharacterized protein	protein_coding	GO:0003674(molecular_function); GO:0005575(cellular_component)	NA	NA	NA	61.6171	75.2933	81.5563	95.8416	119.929	112.611	91.1414	1.50802	0.592655	0.260452	2.27549	0.0228766	0.246851	none
2682446	MGG_02893	MGG_02893T0	Putative uncharacterized protein [Source:UniProtKB/TrEMBL;Acc:G5EH00]	uncharacterized protein	protein_coding	GO:0043581(obsolete mycelium development); GO:0003674(molecular_function); GO:0005575(cellular_component); GO:0016020(membrane); GO:0016021(integral component of membrane)	NA	NA	NA	12.972	7.78896	4.22884	8.15673	49.5706	15.9248	16.4403	2.9674	1.5692	0.690308	2.27319	0.023015	0.246852	none
2680581	MGG_09645	MGG_09645T0	Polyketide synthase [Source:UniProtKB/TrEMBL;Acc:G4NL01]	polyketide synthase	protein_coding	GO:0000166(nucleotide binding); GO:0008152(metabolic process); GO:0016740(transferase activity); GO:0003824(catalytic activity); GO:0009058(biosynthetic process); GO:0048037(obsolete cofactor binding); GO:0031177(phosphopantetheine binding); GO:0005575(cellular_component)	NA	NA	NA	9.08042	16.227	36.2472	38.7445	47.9716	47.7743	32.6742	2.18592	1.12824	0.496548	2.27217	0.0230764	0.246852	none
12987194	MGG_17767	NA	NA	uncharacterized protein	NA	NA	NA	NA	NA	13.6206	22.7178	45.3091	61.1755	51.1697	53.4618	41.2424	2.0205	1.01471	0.446517	2.27251	0.0230557	0.246852	none
2679216	MGG_01778	MGG_01778T0	Aflatoxin efflux pump [Source:UniProtKB/TrEMBL;Acc:G4MVQ9]	aflatoxin efflux pump	protein_coding	GO:0016021(integral component of membrane); GO:0055085(transmembrane transport); GO:0016020(membrane); GO:0022857(transmembrane transporter activity)	NA	NA	NA	86.264	138.254	90.6181	85.6457	215.872	271.859	148.085	1.8326	0.873892	0.384292	2.27403	0.022964	0.246852	none
2677527	MGG_04067	MGG_04067T0	GTPase-activating protein GYP7 [Source:UniProtKB/TrEMBL;Acc:G4NGP5]	GTPase-activating protein GYP7	protein_coding	GO:0043581(obsolete mycelium development); GO:0005622(intracellular); GO:0005097(GO_0005097); GO:0032313(GO_0032313); GO:0005575(cellular_component)	NA	K20168	NA	69.4004	75.2933	50.142	83.6065	167.9	84.1738	88.4194	1.72319	0.785086	0.345092	2.27501	0.0229055	0.246852	none
2682063	MGG_10496	NA	NA	diphthine synthase	NA	NA	NA	K00586	ec:2.1.1.314	62.9143	73.346	63.4327	53.0187	28.7829	38.6745	53.3615	0.595643	-0.747479	0.328961	-2.27224	0.0230719	0.246852	none
2679705	MGG_01453	MGG_01453T0	Putative uncharacterized protein [Source:UniProtKB/TrEMBL;Acc:G4MSI3]	uncharacterized protein	protein_coding	GO:0006508(proteolysis); GO:0008236(serine-type peptidase activity); GO:0016787(hydrolase activity)	NA	NA	NA	14.9178	19.4724	9.66593	0	4.79716	6.82491	9.2797	0.290442	-1.78368	0.784599	-2.27336	0.0230042	0.246852	none
2677928	MGG_04565	MGG_04565T0	TPR domain-containing protein [Source:UniProtKB/TrEMBL;Acc:G4MRT6]	TPR domain-containing protein	protein_coding	GO:0005515(protein binding)	NA	NA	NA	35.0245	23.3669	22.3525	4.07836	12.7924	15.9248	18.9232	0.42741	-1.22631	0.539879	-2.27145	0.0231198	0.24701	none
2676113	MGG_05609	MGG_05609T0	Putative uncharacterized protein [Source:UniProtKB/TrEMBL;Acc:G4MN66]	uncharacterized protein	protein_coding	GO:0000166(nucleotide binding); GO:0003674(molecular_function); GO:0008150(biological_process); GO:0005575(cellular_component); GO:0003676(nucleic acid binding)	NA	NA	NA	80.4266	67.5043	77.3274	48.9404	33.5801	54.5992	60.3963	0.612527	-0.707155	0.311477	-2.27033	0.0231878	0.247432	none
2684444	MGG_06289	MGG_06289T0	NADH-cytochrome b5 reductase 1 [Source:UniProtKB/Swiss-Prot;Acc:A4R935]	NADH-cytochrome b5 reductase 1	protein_coding	GO:0005575(cellular_component); GO:0016491(oxidoreductase activity); GO:0055114(oxidation-reduction process); GO:0004128(cytochrome-b5 reductase activity, acting on NAD(P)H); GO:0005739(mitochondrion); GO:0005741(mitochondrial outer membrane); GO:0016020(membrane); GO:0016021(integral component of membrane); GO:0005783(endoplasmic reticulum); GO:0005789(endoplasmic reticulum membrane)	00520(Amino sugar and nucleotide sugar metabolism)	K00326	ec:1.6.2.2	214.687	186.286	194.527	210.036	316.612	331.008	242.193	1.44793	0.533988	0.235271	2.26967	0.0232277	0.247552	none
2678867	MGG_14266	NA	NA	ubiquitin-conjugating enzyme	NA	NA	04120(Ubiquitin mediated proteolysis)	K02207	ec:2.3.2.23	97.2902	106.449	101.492	138.664	190.287	125.123	126.551	1.48418	0.569668	0.25122	2.2676	0.0233533	0.248585	none
2677572	MGG_04237	MGG_04237T0	Putative uncharacterized protein [Source:UniProtKB/TrEMBL;Acc:G4NFB6]	uncharacterized protein	protein_coding	GO:0008152(metabolic process); GO:0016787(hydrolase activity); GO:0003674(molecular_function); GO:0005575(cellular_component)	NA	NA	NA	71.9948	98.6601	77.9316	122.351	113.533	134.223	103.116	1.49302	0.578236	0.255056	2.26709	0.0233847	0.248613	none
2684008	MGG_05967	MGG_05967T0	Putative uncharacterized protein [Source:UniProtKB/TrEMBL;Acc:G4N4D2]	uncharacterized protein	protein_coding	GO:0016020(membrane); GO:0016021(integral component of membrane)	NA	NA	NA	179.663	246.001	204.797	263.055	289.428	336.695	253.273	1.41533	0.501142	0.221257	2.26498	0.0235141	0.249682	none
5049539	MGG_11750	MGG_11750T0	Putative uncharacterized protein [Source:UniProtKB/TrEMBL;Acc:G4MQ74]	uncharacterized protein	protein_coding	GO:0005576(extracellular region); GO:0019863(IgE binding)	NA	NA	NA	783.511	867.82	867.517	717.792	609.239	589.217	739.183	0.759198	-0.397452	0.175545	-2.2641	0.0235679	0.249947	none
12987240	MGG_17791	MGG_17791T0	Putative uncharacterized protein [Source:UniProtKB/TrEMBL;Acc:G4NHZ9]	uncharacterized protein	protein_coding	GO:0003674(molecular_function); GO:0008150(biological_process); GO:0005575(cellular_component)	NA	NA	NA	18.1608	25.9632	31.4143	65.2538	35.1792	42.0869	36.343	1.86049	0.895683	0.395947	2.26213	0.0236897	0.250931	none
2679065	MGG_08626	NA	NA	tRNA pseudouridine synthase B; tRNA pseudouridine synthase B, variant	NA	NA	NA	K03177	ec:5.4.99.25	68.7518	64.908	71.2862	57.0971	23.9858	39.8119	54.3068	0.581584	-0.781941	0.34616	-2.2589	0.0238894	0.252737	none
2678263	MGG_08212	MGG_08212T0	BZIP transcription factor [Source:UniProtKB/TrEMBL;Acc:G4MZM4]	BZIP transcription factor	protein_coding	GO:0003677(DNA binding); GO:0005634(nucleus); GO:0006355(regulation of transcription, DNA-templated); GO:0043565(sequence-specific DNA binding); GO:0003700(DNA-binding transcription factor activity)	04011(MAPK signaling pathway - yeast)	K09051	NA	79.778	60.3644	48.9338	71.3714	179.094	88.7238	88.0442	1.79758	0.846057	0.374923	2.25662	0.024032	0.253935	none
12984430	MGG_16133	MGG_16133T0	Putative uncharacterized protein [Source:UniProtKB/TrEMBL;Acc:G4MK92]	uncharacterized protein	protein_coding	GO:0016020(membrane); GO:0016021(integral component of membrane)	NA	NA	NA	11.0262	11.6834	10.8742	2.03918	4.79716	2.27497	7.11586	0.270406	-1.8868	0.836332	-2.25605	0.0240678	0.254003	none
2677024	MGG_03291	MGG_03291T0	SDA1 domain-containing protein [Source:UniProtKB/TrEMBL;Acc:G4N9F9]	SDA1 domain-containing protein	protein_coding	GO:0005634(nucleus); GO:0005730(nucleolus); GO:0030036(actin cytoskeleton organization); GO:0042273(ribosomal large subunit biogenesis); GO:0000055(ribosomal large subunit export from nucleus); GO:0007089(traversing start control point of mitotic cell cycle); GO:0042255(ribosome assembly); GO:0042254(ribosome biogenesis); GO:0015031(protein transport)	NA	K14856	NA	103.128	100.607	130.49	71.3714	54.3678	86.4488	91.0688	0.639363	-0.645293	0.286113	-2.25538	0.0241096	0.254135	none
2682072	MGG_10439	MGG_10439T0	MFS transporter [Source:UniProtKB/TrEMBL;Acc:G4MY04]	MFS transporter	protein_coding	GO:0016021(integral component of membrane); GO:0055085(transmembrane transport); GO:0016020(membrane); GO:0022857(transmembrane transporter activity)	NA	NA	NA	10.3776	7.13988	10.2701	20.3918	36.7782	11.3748	16.0554	2.43248	1.28243	0.568727	2.25491	0.0241393	0.254138	none
2679017	MGG_08795	NA	NA	uncharacterized protein	NA	NA	NA	NA	NA	107.019	112.94	148.01	148.86	171.099	233.184	153.519	1.51319	0.597597	0.26533	2.25227	0.0243049	0.255571	none
2683575	MGG_07655	NA	NA	uncharacterized protein	NA	NA	NA	NA	NA	29.8357	20.1215	27.1854	28.5486	70.3583	45.4994	36.9248	1.88582	0.915194	0.406496	2.25142	0.0243589	0.255828	none
2684959	MGG_06786	MGG_06786T0	Disulfide-isomerase A6 precurso [Source:UniProtKB/TrEMBL;Acc:G4MM08]	disulfide-isomerase A6 precurso	protein_coding	GO:0009055(electron transfer activity); GO:0016853(isomerase activity); GO:0045454(cell redox homeostasis); GO:0015035(protein disulfide oxidoreductase activity); GO:0006662(glycerol ether metabolic process); GO:0005575(cellular_component)	04141(Protein processing in endoplasmic reticulum)	K09584	ec:5.3.4.1	100.533	99.9583	74.3068	130.508	127.924	145.598	113.138	1.4754	0.561107	0.249306	2.25067	0.0244062	0.256014	none
2680489	MGG_09534	MGG_09534T0	Hydroxyisourate hydrolase [Source:UniProtKB/TrEMBL;Acc:G4N1C8]	hydroxyisourate hydrolase	protein_coding	GO:0016787(hydrolase activity); GO:0005575(cellular_component)	00230(Purine metabolism)	K07127	ec:3.5.2.17	31.7815	40.892	33.8308	38.7445	65.5611	76.2114	47.8369	1.7232	0.785094	0.348913	2.25012	0.0244416	0.256075	none
2674574	MGG_01139	MGG_01139T0	Dihydroxy-acid dehydratase [Source:UniProtKB/TrEMBL;Acc:G4NC51]	dihydroxy-acid dehydratase	protein_coding	GO:0008152(metabolic process); GO:0003824(catalytic activity); GO:0004160(dihydroxy-acid dehydratase activity); GO:0009082(branched-chain amino acid biosynthetic process); GO:0046872(metal ion binding); GO:0016829(lyase activity); GO:0008652(cellular amino acid biosynthetic process); GO:0051536(iron-sulfur cluster binding); GO:0051539(4 iron, 4 sulfur cluster binding)	00290(Valine, leucine and isoleucine biosynthesis); 00770(Pantothenate and CoA biosynthesis); 01210(2-Oxocarboxylic acid metabolism); 01230(Biosynthesis of amino acids)	K01687	ec:4.2.1.9	111.559	103.853	91.2222	83.6065	46.3725	65.9741	83.7646	0.634304	-0.656753	0.292007	-2.2491	0.0245059	0.256438	none
2683511	MGG_07591	NA	NA	uncharacterized protein	NA	NA	NA	NA	NA	5.18881	4.54356	0.604121	8.15673	9.59431	18.1997	7.71455	3.58374	1.84147	0.819275	2.24768	0.0245967	0.257078	none
2682150	MGG_10531	NA	NA	uncharacterized protein	NA	NA	NA	NA	NA	127.126	202.513	244.669	101.959	46.3725	156.973	146.602	0.535152	-0.901979	0.401727	-2.24525	0.0247519	0.258387	none
2675932	MGG_05590	MGG_05590T0	Zeaxanthin epoxidase [Source:UniProtKB/TrEMBL;Acc:G4MN41]	zeaxanthin epoxidase	protein_coding	GO:0008152(metabolic process); GO:0016491(oxidoreductase activity); GO:0055114(oxidation-reduction process); GO:0016020(membrane); GO:0016021(integral component of membrane); GO:0071949(FAD binding)	NA	NA	NA	5.83741	13.6307	7.85357	26.5094	36.7782	9.09987	16.6182	2.60395	1.3807	0.615252	2.24412	0.0248248	0.258836	none
12985454	MGG_15791	NA	NA	uncharacterized protein	NA	NA	NA	NA	NA	12.972	13.6307	32.0184	65.2538	30.382	32.987	31.2073	2.15625	1.10852	0.494271	2.24275	0.024913	0.259136	none
12986205	MGG_17694	MGG_17694T0	Putative uncharacterized protein [Source:UniProtKB/TrEMBL;Acc:G4NGP3]	uncharacterized protein	protein_coding	GO:0005730(nucleolus); GO:0042254(ribosome biogenesis); GO:0006412(translation); GO:0000466(maturation of 5.8S rRNA from tricistronic rRNA transcript (SSU-rRNA, 5.8S rRNA, LSU-rRNA)); GO:0030687(preribosome, large subunit precursor); GO:0000463(maturation of LSU-rRNA from tricistronic rRNA transcript (SSU-rRNA, 5.8S rRNA, LSU-rRNA)); GO:0003735(structural constituent of ribosome); GO:0005840(ribo…	NA	K14831	NA	138.801	112.291	160.696	112.155	38.3773	87.5863	108.318	0.575151	-0.797988	0.355809	-2.24274	0.0249135	0.259136	none
12984357	MGG_15288	MGG_15288T0	N-acetylated-alpha-linked acidic dipeptidase 2 [Source:UniProtKB/TrEMBL;Acc:G4N6J0]	N-acetylated-alpha-linked acidic dipeptidase 2	protein_coding	GO:0006508(proteolysis); GO:0008233(peptidase activity); GO:0046872(metal ion binding); GO:0016020(membrane); GO:0016021(integral component of membrane)	NA	K01301	ec:3.4.17.21	50.5909	42.8393	37.4555	81.5673	65.5611	63.6991	56.9522	1.5998	0.677889	0.302477	2.24113	0.0250177	0.259596	none
2680673	MGG_09719	MGG_09719T0	Putative uncharacterized protein [Source:UniProtKB/TrEMBL;Acc:G4NAH5]	uncharacterized protein	protein_coding	GO:0043581(obsolete mycelium development); GO:0008152(metabolic process); GO:0016491(oxidoreductase activity); GO:0055114(oxidation-reduction process); GO:0005575(cellular_component)	NA	NA	NA	55.1311	57.7681	50.7461	97.8808	86.3488	70.524	69.7332	1.54218	0.62497	0.278816	2.24151	0.0249929	0.259596	none
2684421	MGG_06266	MGG_06266T0	Eukaryotic peptide chain release factor subunit 1 [Source:UniProtKB/TrEMBL;Acc:G4N8F9]	eukaryotic peptide chain release factor subunit 1	protein_coding	GO:0005737(cytoplasm); GO:0006415(translational termination); GO:0016149(translation release factor activity, codon specific); GO:0006412(translation); GO:0003747(translation release factor activity); GO:0006353(DNA-templated transcription, termination); GO:0010494(cytoplasmic stress granule); GO:0018444(translation release factor complex)	03015(mRNA surveillance pathway)	K03265	NA	468.939	430.989	480.88	352.779	300.622	376.507	401.786	0.746767	-0.42127	0.188086	-2.23977	0.0251059	0.260199	none
2682452	MGG_02899	MGG_02899T0	Proline-specific permease [Source:UniProtKB/TrEMBL;Acc:G5EHZ1]	proline-specific permease	protein_coding	GO:0016021(integral component of membrane); GO:0006810(transport); GO:0055085(transmembrane transport); GO:0016020(membrane); GO:0015171(amino acid transmembrane transporter activity)	NA	K16261	NA	398.89	464.741	452.486	730.027	582.055	506.181	522.397	1.37745	0.462002	0.206372	2.23869	0.0251763	0.260617	none
2677932	MGG_04569	MGG_04569T0	NADPH dehydrogenase [Source:UniProtKB/TrEMBL;Acc:G4MST7]	NADPH dehydrogenase	protein_coding	GO:0043581(obsolete mycelium development); GO:0003824(catalytic activity); GO:0016491(oxidoreductase activity); GO:0055114(oxidation-reduction process); GO:0010181(FMN binding); GO:0005575(cellular_component)	NA	NA	NA	71.3462	60.3644	77.3274	42.8228	41.5754	45.4994	56.4893	0.622938	-0.682839	0.30515	-2.23771	0.0252399	0.260963	none
2682020	MGG_10408	MGG_10408T0	FAD binding domain-containing protein [Source:UniProtKB/TrEMBL;Acc:G4NGA2]	FAD binding domain-containing protein	protein_coding	GO:0050660(flavin adenine dinucleotide binding); GO:0003824(catalytic activity); GO:0016491(oxidoreductase activity); GO:0055114(oxidation-reduction process); GO:0016614(oxidoreductase activity, acting on CH-OH group of donors); GO:0008762(UDP-N-acetylmuramate dehydrogenase activity); GO:0003674(molecular_function); GO:0008150(biological_process); GO:0005575(cellular_component); GO:0071949(FAD bi…	NA	NA	NA	195.878	124.623	171.57	136.625	89.5469	93.2737	135.253	0.643446	-0.636109	0.284409	-2.2366	0.0253126	0.261169	none
2683742	MGG_07815	MGG_07815T0	Putative uncharacterized protein [Source:UniProtKB/TrEMBL;Acc:G4N1F7]	uncharacterized protein	protein_coding	GO:0003674(molecular_function); GO:0008150(biological_process); GO:0005575(cellular_component); GO:0046872(metal ion binding); GO:0016020(membrane)	NA	NA	NA	44.7535	68.1534	70.078	36.7053	28.7829	39.8119	48.0475	0.577778	-0.791412	0.353865	-2.23648	0.0253202	0.261169	none
2681109	MGG_01990	MGG_01990T0	IDI4 [Source:UniProtKB/TrEMBL;Acc:G4MMD3]	IDI4	protein_coding	GO:0003677(DNA binding); GO:0005634(nucleus); GO:0006355(regulation of transcription, DNA-templated); GO:0043565(sequence-specific DNA binding); GO:0003700(DNA-binding transcription factor activity)	NA	NA	NA	1110.41	1250.78	1033.65	1172.53	2716.79	1490.1	1462.38	1.58496	0.664446	0.297258	2.23525	0.0254011	0.261687	none
2685109	MGG_06936	NA	NA	elongation factor 1-gamma	NA	NA	NA	K03233	NA	924.257	915.852	978.676	805.477	636.423	713.203	828.981	0.763658	-0.389002	0.174066	-2.23479	0.0254309	0.261687	none
2676756	MGG_03620	MGG_03620T0	Glucose transporter rco-3 [Source:UniProtKB/TrEMBL;Acc:G4N740]	glucose transporter rco-3	protein_coding	GO:0016021(integral component of membrane); GO:0006810(transport); GO:0055085(transmembrane transport); GO:0008643(carbohydrate transport); GO:0016020(membrane); GO:0005215(transporter activity); GO:0022891(GO_0022891); GO:0022857(transmembrane transporter activity)	NA	NA	NA	117.397	142.798	112.971	124.39	268.641	194.51	160.118	1.58101	0.660845	0.296402	2.22956	0.0257769	0.264932	none
12984512	MGG_17103	MGG_17103T0	Putative uncharacterized protein [Source:UniProtKB/TrEMBL;Acc:G4N8W3]	uncharacterized protein	protein_coding	GO:0016021(integral component of membrane); GO:0005506(iron ion binding); GO:0016020(membrane); GO:0016491(oxidoreductase activity); GO:0055114(oxidation-reduction process); GO:0006633(fatty acid biosynthetic process); GO:0008610(lipid biosynthetic process)	00100(Steroid biosynthesis)	K07750	ec:1.14.18.9	68.1032	88.2748	54.975	40.7836	39.9763	45.4994	56.2687	0.600547	-0.735651	0.330181	-2.22803	0.0258787	0.265664	none
2682127	MGG_10522	NA	NA	uncharacterized protein	NA	NA	NA	K14775	NA	132.963	103.204	157.675	112.155	65.5611	72.799	107.393	0.628623	-0.669734	0.300667	-2.22749	0.0259144	0.265714	none
2682650	MGG_03097	MGG_03097T0	Oxidoreductase [Source:UniProtKB/TrEMBL;Acc:G4NKB0]	oxidoreductase	protein_coding	GO:0051287(NAD binding); GO:0050662(obsolete coenzyme binding); GO:0000166(nucleotide binding); GO:0016491(oxidoreductase activity); GO:0006098(pentose-phosphate shunt); GO:0055114(oxidation-reduction process); GO:0004616(phosphogluconate dehydrogenase (decarboxylating) activity); GO:0006573(valine metabolic process); GO:0008442(3-hydroxyisobutyrate dehydrogenase activity); GO:0016616(oxidoreduct…	00280(Valine, leucine and isoleucine degradation)	K00020	ec:1.1.1.31	75.8864	66.8552	57.9956	46.9012	30.382	44.3619	53.7304	0.605634	-0.723482	0.324939	-2.22651	0.0259798	0.26607	none
2674719	MGG_00375	MGG_00375T0	Glucanase B [Source:UniProtKB/TrEMBL;Acc:G4NCM6]	glucanase B	protein_coding	GO:0008150(biological_process); GO:0005575(cellular_component)	NA	NA	NA	9.08042	5.19264	6.04121	28.5486	11.1934	13.6498	12.2843	2.5631	1.35789	0.611205	2.22166	0.0263061	0.268891	none
2680192	MGG_09256	NA	NA	uncharacterized protein	NA	NA	03018(RNA degradation)	K12597	NA	64.8602	46.0847	56.7873	36.7053	33.5801	29.5746	44.5987	0.589639	-0.762097	0.343106	-2.22117	0.0263396	0.268891	none
2683241	MGG_07119	MGG_07119T0	Atypical/RIO/RIO2 protein kinase [Source:UniProtKB/TrEMBL;Acc:G4MT37]	atypical/RIO/RIO2 protein kinase	protein_coding	GO:0005524(ATP binding); GO:0004674(protein serine/threonine kinase activity); GO:0003824(catalytic activity); GO:0006468(protein phosphorylation); GO:0016772(transferase activity, transferring phosphorus-containing groups); GO:0016301(kinase activity); GO:0016310(phosphorylation); GO:0008150(biological_process); GO:0005575(cellular_component); GO:0000166(nucleotide binding); GO:0016740(transfera…	03008(Ribosome biogenesis in eukaryotes)	K07179	ec:2.7.11.1	47.3479	44.7865	59.8079	24.4702	12.7924	39.8119	38.1695	0.519487	-0.94484	0.425405	-2.22104	0.0263485	0.268891	none
2681394	MGG_02297	MGG_02297T0	Putative uncharacterized protein [Source:UniProtKB/TrEMBL;Acc:G4MQ58]	uncharacterized protein	protein_coding	GO:0003674(molecular_function); GO:0008150(biological_process); GO:0005783(endoplasmic reticulum); GO:0005789(endoplasmic reticulum membrane); GO:0030246(carbohydrate binding)	04141(Protein processing in endoplasmic reticulum)	K10088	NA	102.479	88.2748	92.4305	116.233	161.504	133.086	115.668	1.45456	0.540586	0.243585	2.21929	0.0264672	0.269784	none
2678411	MGG_08175	MGG_08175T0	PQ loop repeat protein [Source:UniProtKB/TrEMBL;Acc:G4MZ67]	PQ loop repeat protein	protein_coding	GO:0003674(molecular_function); GO:0008150(biological_process); GO:0005575(cellular_component); GO:0016020(membrane); GO:0016021(integral component of membrane)	NA	K23679	NA	64.2116	78.5387	59.2038	48.9404	30.382	43.2244	54.0835	0.604549	-0.72607	0.327401	-2.21768	0.0265769	0.270219	none
5050244	MGG_14800	NA	NA	uncharacterized protein	NA	NA	03008(Ribosome biogenesis in eukaryotes)	K14553	NA	75.2378	86.3276	81.5563	67.293	27.1839	51.1868	64.7976	0.593673	-0.75226	0.339271	-2.21729	0.0266035	0.270219	none
2680798	MGG_09807	MGG_09807T0	Putative uncharacterized protein [Source:UniProtKB/TrEMBL;Acc:G4NIK7]	uncharacterized protein	protein_coding	GO:0016020(membrane); GO:0016021(integral component of membrane)	NA	NA	NA	29.1871	35.0503	25.9772	12.2351	17.5896	14.7873	22.4711	0.498451	-1.00448	0.452925	-2.21775	0.0265716	0.270219	none
2677473	MGG_03781	MGG_03781T0	Putative uncharacterized protein [Source:UniProtKB/TrEMBL;Acc:G4NHN3]	uncharacterized protein	protein_coding	NA	NA	NA	NA	14.2692	17.5252	13.8948	6.11755	4.79716	5.68742	10.3819	0.362398	-1.46435	0.661207	-2.21466	0.0267831	0.271725	none
2676363	MGG_11418	MGG_11418T0	Nucleic acid-binding protein [Source:UniProtKB/TrEMBL;Acc:G4MYV6]	nucleic acid-binding protein	protein_coding	GO:0003676(nucleic acid binding); GO:0000166(nucleotide binding); GO:0008150(biological_process); GO:0003723(RNA binding)	NA	NA	NA	207.552	254.439	239.232	187.605	143.915	170.623	200.561	0.714564	-0.484865	0.219024	-2.21375	0.0268459	0.272042	none
2676861	MGG_03245	MGG_03245T0	Aldose 1-epimerase [Source:UniProtKB/TrEMBL;Acc:G4N9V8]	aldose 1-epimerase	protein_coding	GO:0005975(carbohydrate metabolic process); GO:0016853(isomerase activity); GO:0003824(catalytic activity); GO:0030246(carbohydrate binding); GO:0005575(cellular_component)	00010(Glycolysis / Gluconeogenesis); 00052(Galactose metabolism)	K01785	ec:5.1.3.3	631.089	700.357	764.817	581.167	452.532	534.618	610.763	0.74744	-0.419971	0.189958	-2.21086	0.0270458	0.273747	none
2675474	MGG_05033	MGG_05033T0	Putative uncharacterized protein [Source:UniProtKB/TrEMBL;Acc:G4N3W1]	uncharacterized protein	protein_coding	GO:0008270(zinc ion binding); GO:0005634(nucleus); GO:0006355(regulation of transcription, DNA-templated); GO:0003700(DNA-binding transcription factor activity); GO:0000981(DNA-binding transcription factor activity, RNA polymerase II-specific); GO:0006357(regulation of transcription by RNA polymerase II); GO:0042025(host cell nucleus)	NA	NA	NA	62.2657	56.4699	49.5379	67.293	111.934	84.1738	71.9457	1.57275	0.653289	0.29577	2.20877	0.0271903	0.274074	none
2682515	MGG_02962	MGG_02962T0; MGG_02962T1	C6 zinc finger domain-containing protein; C6 zinc finger domain-containing protein, variant [Source:UniProtKB/TrEMBL;Acc:G4NLB5]	C6 zinc finger domain-containing protein, variant; C6 zinc finger domain-containing protein	protein_coding	GO:0008270(zinc ion binding); GO:0005634(nucleus); GO:0006355(regulation of transcription, DNA-templated); GO:0003700(DNA-binding transcription factor activity); GO:0000981(DNA-binding transcription factor activity, RNA polymerase II-specific); GO:0006357(regulation of transcription by RNA polymerase II); GO:0042025(host cell nucleus)	NA	NA	NA	124.531	126.571	146.197	171.291	204.679	178.585	158.642	1.39624	0.481546	0.217963	2.2093	0.0271535	0.274074	none
12985076	MGG_17513	MGG_17513T0	Delta-1-pyrroline-5-carboxylate dehydrogenase [Source:UniProtKB/TrEMBL;Acc:G4NDW5]	delta-1-pyrroline-5-carboxylate dehydrogenase	protein_coding	GO:0008152(metabolic process); GO:0005759(mitochondrial matrix); GO:0006561(proline biosynthetic process); GO:0016491(oxidoreductase activity); GO:0055114(oxidation-reduction process); GO:0006537(glutamate biosynthetic process); GO:0016620(oxidoreductase activity, acting on the aldehyde or oxo group of donors, NAD or NADP as acceptor); GO:0010133(proline catabolic process to glutamate); GO:000384…	00250(Alanine, aspartate and glutamate metabolism); 00330(Arginine and proline metabolism)	K00294	ec:1.2.1.88	981.983	1249.48	901.952	1272.45	1647.02	1371.81	1237.45	1.36991	0.454084	0.205601	2.20857	0.0272047	0.274074	none
2677406	MGG_03764	MGG_03764T0	Salicylate hydroxylase [Source:UniProtKB/TrEMBL;Acc:G4NHP7]	salicylate hydroxylase	protein_coding	GO:0008152(metabolic process); GO:0016491(oxidoreductase activity); GO:0055114(oxidation-reduction process); GO:0071949(FAD binding)	NA	K00480	ec:1.14.13.1	38.9161	44.7865	24.7689	20.3918	23.9858	7.96239	26.8019	0.467674	-1.09643	0.496349	-2.20898	0.0271761	0.274074	none
2675683	MGG_04999	MGG_04999T0	Putative uncharacterized protein [Source:UniProtKB/TrEMBL;Acc:G4N3S3]	uncharacterized protein	protein_coding	GO:0050660(flavin adenine dinucleotide binding); GO:0016491(oxidoreductase activity); GO:0055114(oxidation-reduction process); GO:0005575(cellular_component)	NA	NA	NA	36.3217	33.1031	22.9566	48.9404	59.1649	48.9118	41.5664	1.70138	0.766706	0.347275	2.20778	0.0272597	0.274218	none
2680255	MGG_09188	NA	NA	malate dehydrogenase	NA	NA	NA	NA	NA	151.124	219.389	128.678	261.015	196.683	307.121	210.668	1.5357	0.618896	0.280367	2.20745	0.0272824	0.274218	none
2677361	MGG_03988	MGG_03988T0	Putative uncharacterized protein [Source:UniProtKB/TrEMBL;Acc:G4NGY8]	uncharacterized protein	protein_coding	GO:0003674(molecular_function); GO:0005575(cellular_component)	NA	NA	NA	22.0525	10.3853	5.43709	2.03918	0	5.68742	7.60024	0.222792	-2.16623	0.981691	-2.20663	0.0273401	0.274479	none
2679415	MGG_01236	MGG_01236T0	WD repeat-containing protein slp1 [Source:UniProtKB/TrEMBL;Acc:G4MXK2]	WD repeat-containing protein slp1	protein_coding	GO:0003674(molecular_function); GO:0005575(cellular_component); GO:0010997(anaphase-promoting complex binding); GO:0097027(ubiquitin-protein transferase activator activity); GO:1904668(positive regulation of ubiquitin protein ligase activity); GO:0005515(protein binding)	04111(Cell cycle - yeast); 04113(Meiosis - yeast); 04120(Ubiquitin mediated proteolysis)	K03363	NA	234.794	218.74	218.692	179.448	145.514	166.073	193.877	0.729127	-0.455759	0.206892	-2.20288	0.027603	0.276797	none
2680097	MGG_09110	MGG_09110T0	Putative uncharacterized protein [Source:UniProtKB/TrEMBL;Acc:G4MZW7]	uncharacterized protein	protein_coding	GO:0003674(molecular_function); GO:0008150(biological_process); GO:0005575(cellular_component)	NA	NA	NA	77.1836	66.2061	66.4533	73.4106	204.679	92.1362	96.6781	1.76685	0.821182	0.372911	2.20209	0.0276591	0.277039	none
2684175	MGG_05800	MGG_05800T0	Putative uncharacterized protein [Source:UniProtKB/TrEMBL;Acc:G4N0H3]	uncharacterized protein	protein_coding	GO:0016020(membrane); GO:0016021(integral component of membrane)	NA	NA	NA	72.6434	121.378	56.1832	83.6065	190.287	167.21	115.218	1.77363	0.826702	0.375508	2.20156	0.0276964	0.277093	none
2681338	MGG_02241	MGG_02241T0	FMP21 [Source:UniProtKB/TrEMBL;Acc:G4MPQ0]	FMP21	protein_coding	GO:0006457(protein folding); GO:0008177(succinate dehydrogenase (ubiquinone) activity); GO:0044183(protein folding chaperone); GO:0034553(mitochondrial respiratory chain complex II assembly); GO:0034614(cellular response to reactive oxygen species); GO:0045333(cellular respiration); GO:0005749(mitochondrial respiratory chain complex II, succinate dehydrogenase complex (ubiquinone)); GO:0005759(mi…	NA	NA	NA	35.6731	28.5595	36.8514	42.8228	57.5659	65.9741	44.5745	1.66617	0.736539	0.334645	2.20096	0.027739	0.277138	none
2677383	MGG_04331	MGG_04331T0	37S ribosomal protein MRP4 [Source:UniProtKB/TrEMBL;Acc:G4NGF2]	37S ribosomal protein MRP4	protein_coding	GO:0006412(translation); GO:0030529(GO_0030529); GO:0003735(structural constituent of ribosome); GO:0005840(ribosome); GO:0005622(intracellular); GO:0015935(small ribosomal subunit); GO:0003674(molecular_function); GO:0008150(biological_process); GO:0005575(cellular_component)	03010(Ribosome)	K02967	NA	138.152	136.956	135.927	110.116	83.1507	94.4112	116.452	0.696414	-0.521983	0.237201	-2.20059	0.027765	0.277138	none
2679147	MGG_01369	MGG_01369T0	Alpha/beta hydrolase fold-3 domain-containing protein [Source:UniProtKB/TrEMBL;Acc:G4MZ31]	alpha/beta hydrolase fold-3 domain-containing protein	protein_coding	GO:0008152(metabolic process); GO:0016787(hydrolase activity); GO:0008150(biological_process); GO:0005575(cellular_component)	NA	NA	NA	102.479	126.571	80.9522	112.155	681.196	196.785	216.69	3.195	1.67582	0.761693	2.20012	0.0277982	0.277149	none
2681829	MGG_10277	NA	NA	uncharacterized protein	NA	NA	NA	NA	NA	9.72902	1.94724	4.83297	32.6269	11.1934	9.09987	11.5716	3.11375	1.63865	0.745306	2.19863	0.0279042	0.277446	none
2683258	MGG_07136	NA	NA	nucleolar GTP-binding protein 1	NA	NA	03008(Ribosome biogenesis in eukaryotes)	K06943	NA	217.93	231.072	300.852	197.801	118.33	185.41	208.566	0.668091	-0.581883	0.264669	-2.19853	0.0279111	0.277446	none
12984170	MGG_16695	NA	NA	uncharacterized protein, partial	NA	NA	NA	NA	NA	30.4843	38.2957	50.7461	26.5094	20.7877	17.0623	30.6476	0.527217	-0.923532	0.420102	-2.19835	0.0279241	0.277446	none
2681443	MGG_02346	MGG_02346T0	Putative uncharacterized protein [Source:UniProtKB/TrEMBL;Acc:G4MQL3]	uncharacterized protein	protein_coding	GO:0016021(integral component of membrane); GO:0055085(transmembrane transport); GO:0022857(transmembrane transporter activity); GO:0016020(membrane)	NA	NA	NA	50.5909	33.1031	42.8926	6.11755	17.5896	32.987	30.5468	0.471119	-1.08584	0.494189	-2.19721	0.0280053	0.277933	none
12984742	MGG_17878	MGG_17878T0	Putative uncharacterized protein [Source:UniProtKB/TrEMBL;Acc:G5EHE5]	uncharacterized protein	protein_coding	GO:0000287(magnesium ion binding); GO:0008897(holo-[acyl-carrier-protein] synthase activity); GO:0009059(macromolecule biosynthetic process); GO:0005575(cellular_component); GO:0016740(transferase activity)	00770(Pantothenate and CoA biosynthesis)	K06133	NA	16.215	23.3669	18.1236	40.7836	35.1792	30.7121	27.3967	1.83082	0.872491	0.3974	2.1955	0.028128	0.278831	none
2677113	MGG_03940	MGG_03940T0	Putative uncharacterized protein [Source:UniProtKB/TrEMBL;Acc:G4NH48]	uncharacterized protein	protein_coding	GO:0030170(pyridoxal phosphate binding); GO:0003824(catalytic activity); GO:0009058(biosynthetic process); GO:0005575(cellular_component)	NA	NA	NA	304.843	236.265	324.413	232.467	171.099	207.022	246.018	0.7039	-0.506557	0.2308	-2.19478	0.0281791	0.279019	none
2675711	MGG_05232	MGG_05232T0	Putative uncharacterized protein [Source:UniProtKB/TrEMBL;Acc:G4N5C1]	uncharacterized protein	protein_coding	GO:0043581(obsolete mycelium development); GO:0052051(obsolete interaction with host via protein secreted by type II secretion system); GO:0003674(molecular_function); GO:0005575(cellular_component); GO:0030246(carbohydrate binding)	NA	NA	NA	13.6206	14.2798	4.83297	16.3135	33.5801	25.0247	17.9419	2.31616	1.21174	0.552401	2.19358	0.0282653	0.279552	none
2676480	MGG_03348	MGG_03348T0	Phosphate-repressible phosphate permease [Source:UniProtKB/TrEMBL;Acc:G4N8Z1]	phosphate-repressible phosphate permease	protein_coding	GO:0016020(membrane); GO:0006817(phosphate ion transport); GO:0005315(inorganic phosphate transmembrane transporter activity); GO:0016021(integral component of membrane); GO:0055085(transmembrane transport); GO:0015293(symporter activity)	NA	K14640	NA	126.477	138.254	93.0346	28.5486	1885.28	561.917	472.252	6.92086	2.79095	1.27367	2.19126	0.0284328	0.280567	none
2676400	MGG_10878	NA	NA	galactose oxidase	NA	NA	00052(Galactose metabolism)	K04618	ec:1.1.3.9	38.9161	45.4356	51.3503	24.4702	25.5848	27.2996	35.5094	0.572736	-0.804057	0.36688	-2.19161	0.0284078	0.280567	none
2674865	MGG_00790	MGG_00790T0	Putative uncharacterized protein [Source:UniProtKB/TrEMBL;Acc:G4NED2]	uncharacterized protein	protein_coding	GO:0016491(oxidoreductase activity); GO:0055114(oxidation-reduction process)	NA	NA	NA	9.08042	16.8761	25.3731	0	9.59431	5.68742	11.1019	0.31184	-1.68112	0.767361	-2.19079	0.0284673	0.280588	none
5051133	MGG_11160	MGG_11160T0	Putative uncharacterized protein [Source:UniProtKB/TrEMBL;Acc:G4MVA1]	uncharacterized protein	protein_coding	GO:0046872(metal ion binding); GO:0008270(zinc ion binding); GO:0003677(DNA binding); GO:0005634(nucleus); GO:0006355(regulation of transcription, DNA-templated); GO:0006351(transcription, DNA-templated); GO:0003700(DNA-binding transcription factor activity); GO:0000981(DNA-binding transcription factor activity, RNA polymerase II-specific); GO:0006357(regulation of transcription by RNA polymerase…	NA	NA	NA	51.2395	48.681	42.2884	46.9012	100.74	85.3113	62.527	1.65648	0.728124	0.332497	2.18987	0.0285337	0.280922	none
12984909	MGG_18006	MGG_18006T0	Putative uncharacterized protein [Source:UniProtKB/TrEMBL;Acc:G4NJI6]	uncharacterized protein	protein_coding	GO:0003674(molecular_function); GO:0008150(biological_process); GO:0005575(cellular_component)	NA	NA	NA	3.24301	0.64908	2.41648	12.2351	6.39621	6.82491	5.29413	3.94558	1.98024	0.905007	2.18809	0.0286629	0.281874	none
2681827	MGG_10276	MGG_10276T0	Putative uncharacterized protein [Source:UniProtKB/TrEMBL;Acc:Q2KEJ2]	uncharacterized protein	protein_coding	GO:0046872(metal ion binding); GO:0008270(zinc ion binding); GO:0005622(intracellular); GO:0008150(biological_process); GO:0003676(nucleic acid binding)	NA	NA	NA	31.1329	28.5595	63.4327	120.312	46.3725	72.799	60.4347	1.92688	0.946268	0.432716	2.18681	0.0287563	0.282471	none
2682779	MGG_02774	MGG_02774T0	Copper transporter [Source:UniProtKB/TrEMBL;Acc:G5EHU1]	copper transporter	protein_coding	GO:0016021(integral component of membrane); GO:0005375(copper ion transmembrane transporter activity); GO:0016020(membrane); GO:0035434(copper ion transmembrane transport); GO:0006811(ion transport); GO:0006825(copper ion transport); GO:0006878(cellular copper ion homeostasis)	NA	NA	NA	65.5088	81.135	73.0986	83.6065	131.122	114.886	91.5595	1.5097	0.594258	0.271914	2.18546	0.0288552	0.282906	none
2678481	MGG_08300	NA	NA	uncharacterized protein	NA	NA	NA	NA	NA	927.5	795.772	709.238	685.165	450.933	605.142	695.625	0.715214	-0.483553	0.221274	-2.18531	0.028866	0.282906	none
2680686	MGG_09732	NA	NA	feruloyl esterase	NA	NA	NA	K09252	ec:3.1.1.73	23.3497	22.0687	14.4989	30.5877	49.5706	31.8496	28.6542	1.87236	0.90486	0.414431	2.18338	0.0290079	0.283375	none
2676597	MGG_03675	MGG_03675T0	Putative uncharacterized protein [Source:UniProtKB/TrEMBL;Acc:G4N6S3]	uncharacterized protein	protein_coding	NA	NA	NA	NA	39.5647	44.7865	25.3731	36.7053	73.5564	84.1738	50.6933	1.80022	0.848173	0.388575	2.18278	0.0290522	0.283375	none
12986265	MGG_16353	MGG_16353T0	Putative uncharacterized protein [Source:UniProtKB/TrEMBL;Acc:G4MLB9]	uncharacterized protein	protein_coding	GO:0003674(molecular_function); GO:0008150(biological_process); GO:0005575(cellular_component)	NA	NA	NA	83.021	69.4515	76.1192	85.6457	132.721	121.711	94.7783	1.49859	0.583604	0.267464	2.18199	0.0291102	0.283375	none
2674216	MGG_00631	MGG_00631T0	Putative uncharacterized protein [Source:UniProtKB/TrEMBL;Acc:G4NB41]	uncharacterized protein	protein_coding	GO:0003674(molecular_function); GO:0008150(biological_process); GO:0005575(cellular_component); GO:0016020(membrane); GO:0016021(integral component of membrane)	NA	NA	NA	191.986	246.001	161.904	236.545	305.419	321.908	243.961	1.44554	0.531607	0.243623	2.18209	0.0291029	0.283375	none
2678434	MGG_08199	MGG_08199T0	Cutinase transcription factor 1 beta [Source:UniProtKB/TrEMBL;Acc:G4MZ96]	cutinase transcription factor 1 beta	protein_coding	GO:0046872(metal ion binding); GO:0008270(zinc ion binding); GO:0003677(DNA binding); GO:0005634(nucleus); GO:0006355(regulation of transcription, DNA-templated); GO:0006351(transcription, DNA-templated); GO:0003700(DNA-binding transcription factor activity); GO:0000981(DNA-binding transcription factor activity, RNA polymerase II-specific); GO:0006357(regulation of transcription by RNA polymerase…	NA	NA	NA	188.094	203.162	174.591	205.957	323.009	270.721	227.589	1.41806	0.503922	0.230915	2.18228	0.0290885	0.283375	none
2680938	MGG_09894	NA	NA	40S ribosomal protein S28	NA	NA	03010(Ribosome)	K02979	NA	853.56	931.429	1057.21	850.339	378.975	627.891	783.234	0.652479	-0.615997	0.282255	-2.18242	0.0290788	0.283375	none
2680901	MGG_09931	NA	NA	lipid A export ATP-binding/permease msbA	NA	NA	02010(ABC transporters)	K05658	ec:7.6.2.2	200.418	223.283	160.696	163.135	495.706	331.008	262.374	1.69827	0.764065	0.350547	2.17964	0.0292844	0.283748	none
2674275	MGG_00432	MGG_00432T0	Putative uncharacterized protein [Source:UniProtKB/TrEMBL;Acc:G4NCA6]	uncharacterized protein	protein_coding	GO:0003674(molecular_function); GO:0008150(biological_process); GO:0005575(cellular_component)	NA	NA	NA	946.31	1192.36	732.194	1005.32	2069.17	1385.46	1221.8	1.55424	0.636208	0.291833	2.18004	0.0292548	0.283748	none
2678177	MGG_04370	MGG_04370T0	Putative uncharacterized protein [Source:UniProtKB/TrEMBL;Acc:G4MZC0]	uncharacterized protein	protein_coding	GO:0016020(membrane); GO:0016021(integral component of membrane)	NA	NA	NA	59.6713	65.5571	62.2244	87.6848	103.938	86.4488	77.5875	1.4822	0.56774	0.26052	2.17926	0.0293126	0.283748	none
2684719	MGG_06564	NA	NA	cAMP-independent regulatory protein pac2	NA	NA	NA	K21631	NA	169.934	138.254	123.241	185.566	217.471	204.747	173.202	1.41171	0.497448	0.228242	2.17948	0.0292961	0.283748	none
2684190	MGG_05785	MGG_05785T0	Levanase [Source:UniProtKB/TrEMBL;Acc:G4N0X0]	levanase	protein_coding	GO:0005975(carbohydrate metabolic process); GO:0008152(metabolic process); GO:0016787(hydrolase activity); GO:0004553(hydrolase activity, hydrolyzing O-glycosyl compounds); GO:0016798(hydrolase activity, acting on glycosyl bonds); GO:0005575(cellular_component)	00052(Galactose metabolism); 00500(Starch and sucrose metabolism)	K01193	ec:3.2.1.26	815.941	595.855	1033.05	717.792	422.15	466.369	675.192	0.655477	-0.609383	0.279614	-2.17937	0.029304	0.283748	none
5049507	MGG_11713	MGG_11713T0	Putative uncharacterized protein [Source:UniProtKB/TrEMBL;Acc:G4MRM2]	uncharacterized protein	protein_coding	GO:0016021(integral component of membrane); GO:0055085(transmembrane transport); GO:0016020(membrane); GO:0022857(transmembrane transporter activity)	NA	NA	NA	14.2692	14.2798	10.2701	32.6269	20.7877	25.0247	19.543	2.00444	1.0032	0.460635	2.17787	0.0294161	0.284432	none
2683807	MGG_07880	MGG_07880T0	Putative uncharacterized protein [Source:UniProtKB/TrEMBL;Acc:G4N203]	uncharacterized protein	protein_coding	NA	NA	NA	NA	11.0262	11.0344	33.2266	42.8228	36.7782	38.6745	28.9271	2.12707	1.08887	0.500351	2.17621	0.0295394	0.285306	none
2680538	MGG_09501	NA	NA	serine racemase	NA	NA	00260(Glycine, serine and threonine metabolism); 00290(Valine, leucine and isoleucine biosynthesis); 01230(Biosynthesis of amino acids)	K01754	ec:4.3.1.19	125.18	107.098	100.284	97.8808	62.363	58.0117	91.803	0.645796	-0.63085	0.290123	-2.17442	0.0296737	0.285908	none
2677970	MGG_04574	MGG_04574T0	3-beta-hydroxysteroid-Delta(8), Delta(7)-isomerase [Source:UniProtKB/TrEMBL;Acc:G4MSU2]	3-beta-hydroxysteroid-Delta(8),Delta(7)-isomerase	protein_coding	GO:0016021(integral component of membrane); GO:0005783(endoplasmic reticulum); GO:0016853(isomerase activity); GO:0016125(sterol metabolic process); GO:0047750(cholestenol delta-isomerase activity); GO:0016020(membrane); GO:0005789(endoplasmic reticulum membrane)	00100(Steroid biosynthesis)	K01824	ec:5.3.3.5	75.2378	61.0135	65.8492	50.9796	36.7782	39.8119	54.945	0.624787	-0.678563	0.312118	-2.17406	0.0297008	0.285908	none
2677931	MGG_04568	MGG_04568T0	Putative uncharacterized protein [Source:UniProtKB/TrEMBL;Acc:G4MST6]	uncharacterized protein	protein_coding	NA	NA	NA	NA	88.2098	55.8209	73.7027	48.9404	51.1697	31.8496	58.2822	0.597259	-0.743571	0.342001	-2.17418	0.0296919	0.285908	none
2676487	MGG_03146	MGG_03146T0	Putative uncharacterized protein [Source:UniProtKB/TrEMBL;Acc:G4NAT9]	uncharacterized protein	protein_coding	GO:0038032(termination of G protein-coupled receptor signaling pathway); GO:0008150(biological_process); GO:0005575(cellular_component)	NA	NA	NA	40.2133	57.119	48.9338	53.0187	99.1412	84.1738	63.7667	1.63007	0.704933	0.324353	2.17335	0.0297542	0.286044	none
2677130	MGG_04206	MGG_04206T0	Putative uncharacterized protein [Source:UniProtKB/TrEMBL;Acc:G4NF70]	uncharacterized protein	protein_coding	GO:0043581(obsolete mycelium development); GO:0003674(molecular_function); GO:0005575(cellular_component); GO:0016020(membrane); GO:0016021(integral component of membrane)	NA	NA	NA	202.364	234.967	161.904	230.428	383.773	272.996	247.739	1.48289	0.568415	0.261582	2.17299	0.0297811	0.286044	none
2684816	MGG_06643	MGG_06643T0	Putative uncharacterized protein [Source:UniProtKB/TrEMBL;Acc:G4MKP3]	uncharacterized protein	protein_coding	GO:0006508(proteolysis); GO:0004222(metalloendopeptidase activity); GO:0043581(obsolete mycelium development); GO:0008237(metallopeptidase activity); GO:0046872(metal ion binding); GO:0016020(membrane); GO:0016021(integral component of membrane); GO:0016787(hydrolase activity); GO:0008233(peptidase activity)	NA	K01415	ec:3.4.24.71	275.007	321.294	300.248	320.152	482.914	437.931	356.258	1.38812	0.473137	0.217935	2.171	0.029931	0.287165	none
2684508	MGG_06353	MGG_06353T0	Putative uncharacterized protein [Source:UniProtKB/TrEMBL;Acc:G4N7V4]	uncharacterized protein	protein_coding	GO:0003674(molecular_function); GO:0008150(biological_process); GO:0005575(cellular_component)	NA	NA	NA	57.0769	86.3276	66.4533	81.5673	145.514	104.649	90.2646	1.58657	0.66591	0.306904	2.16977	0.0300244	0.287742	none
2683432	MGG_07512	MGG_07512T0	Glutaminase GtaA [Source:UniProtKB/TrEMBL;Acc:G4N1P6]	glutaminase GtaA	protein_coding	GO:0003674(molecular_function); GO:0005575(cellular_component)	NA	NA	NA	74.5892	87.6258	83.9728	95.8416	131.122	130.811	100.66	1.46361	0.549534	0.253722	2.16589	0.0303195	0.290249	none
2681105	MGG_01986	MGG_01986T0	Putative uncharacterized protein [Source:UniProtKB/TrEMBL;Acc:G4MMC8]	uncharacterized protein	protein_coding	NA	NA	NA	NA	40.2133	35.0503	57.9956	87.6848	54.3678	79.6239	59.156	1.65798	0.729427	0.336874	2.16528	0.030366	0.290373	none
2676388	MGG_14099	MGG_14099T0	Putative uncharacterized protein [Source:UniProtKB/TrEMBL;Acc:G4MXH6]	uncharacterized protein	protein_coding	GO:0046872(metal ion binding); GO:0009055(electron transfer activity); GO:0020037(heme binding); GO:0005506(iron ion binding); GO:0055114(oxidation-reduction process); GO:0004497(monooxygenase activity); GO:0016705(oxidoreductase activity, acting on paired donors, with incorporation or reduction of molecular oxygen)	NA	NA	NA	7.78322	17.5252	10.8742	32.6269	20.7877	23.8872	18.9141	2.11646	1.08165	0.500289	2.16206	0.0306137	0.291549	none
2674731	MGG_01061	MGG_01061T0	Coproporphyrinogen III oxidase [Source:UniProtKB/TrEMBL;Acc:G4NCJ7]	coproporphyrinogen III oxidase	protein_coding	GO:0043581(obsolete mycelium development); GO:0055114(oxidation-reduction process); GO:0004109(coproporphyrinogen oxidase activity); GO:0006779(porphyrin-containing compound biosynthetic process); GO:0005575(cellular_component); GO:0016491(oxidoreductase activity); GO:0006782(protoporphyrinogen IX biosynthetic process)	00860(Porphyrin metabolism); 01240(Biosynthesis of cofactors)	K00228	ec:1.3.3.3	93.3986	126.571	139.552	163.135	257.447	141.048	153.525	1.55892	0.640545	0.296176	2.16272	0.030563	0.291549	none
2677960	MGG_04440	MGG_04440T0	Putative uncharacterized protein [Source:UniProtKB/TrEMBL;Acc:G4MSB6]	uncharacterized protein	protein_coding	GO:0003674(molecular_function); GO:0005575(cellular_component); GO:0016020(membrane); GO:0016021(integral component of membrane)	NA	NA	NA	72.6434	62.9607	54.3709	30.5877	47.9716	36.3995	50.8223	0.608304	-0.717135	0.33167	-2.1622	0.030603	0.291549	none
2678498	MGG_08360	MGG_08360T0	Putative uncharacterized protein [Source:UniProtKB/TrEMBL;Acc:G4MWD4]	uncharacterized protein	protein_coding	GO:0003674(molecular_function); GO:0008150(biological_process); GO:0005575(cellular_component)	NA	NA	NA	57.0769	52.5755	85.181	53.0187	25.5848	34.1245	51.2603	0.568935	-0.813665	0.376361	-2.16193	0.0306237	0.291549	none
2684488	MGG_06333	MGG_06333T0	60S ribosomal protein L29 [Source:UniProtKB/TrEMBL;Acc:G4N829]	60S ribosomal protein L29	protein_coding	GO:0006412(translation); GO:0003735(structural constituent of ribosome); GO:0005840(ribosome); GO:0005622(intracellular)	03010(Ribosome)	K02905	NA	1025.44	1100.84	1339.34	1074.65	572.461	710.928	970.609	0.679172	-0.558151	0.258416	-2.15989	0.0307812	0.292725	none
2683692	MGG_07765	MGG_07765T0	Putative uncharacterized protein [Source:UniProtKB/TrEMBL;Acc:G4N0P0]	uncharacterized protein	protein_coding	GO:0003674(molecular_function); GO:0008150(biological_process); GO:0005575(cellular_component)	NA	NA	NA	20.7552	12.9816	17.5195	32.6269	36.7782	27.2996	24.6602	1.87414	0.906228	0.420249	2.15641	0.031052	0.294977	none
2682115	MGG_10503	NA	NA	mannitol-1-phosphate 5-dehydrogenase	NA	NA	00051(Fructose and mannose metabolism)	K00009	ec:1.1.1.17	377.486	284.297	236.211	334.426	954.634	325.321	418.729	1.79775	0.84619	0.392513	2.15583	0.0310973	0.295083	none
2680280	MGG_09262	NA	NA	autophagy protein 5	NA	NA	04136(Autophagy - other); 04138(Autophagy - yeast)	K08339	NA	46.0507	56.4699	40.4761	18.3526	31.981	29.5746	37.1508	0.5688	-0.814007	0.377722	-2.15505	0.0311583	0.295338	none
2677518	MGG_04244	MGG_04244T0	Putative uncharacterized protein [Source:UniProtKB/TrEMBL;Acc:G4NFA8]	uncharacterized protein	protein_coding	GO:0055114(oxidation-reduction process); GO:0006537(glutamate biosynthetic process); GO:0004657(proline dehydrogenase activity); GO:0006562(proline catabolic process); GO:0016491(oxidoreductase activity); GO:0006560(proline metabolic process)	NA	NA	NA	247.117	329.083	265.813	430.267	362.985	358.308	332.262	1.36469	0.44857	0.208298	2.1535	0.0312791	0.295697	none
2679960	MGG_08975	MGG_08975T0	3-hydroxy-3-methylglutaryl-coenzyme A reductase [Source:UniProtKB/TrEMBL;Acc:G4MWF9]	3-hydroxy-3-methylglutaryl-coenzyme A reductase	protein_coding	GO:0016021(integral component of membrane); GO:0050662(obsolete coenzyme binding); GO:0016491(oxidoreductase activity); GO:0055114(oxidation-reduction process); GO:0050661(NADP binding); GO:0016616(oxidoreductase activity, acting on the CH-OH group of donors, NAD or NADP as acceptor); GO:0008299(isoprenoid biosynthetic process); GO:0015936(coenzyme A metabolic process); GO:0004420(hydroxymethylgl…	00900(Terpenoid backbone biosynthesis)	K00021	ec:1.1.1.34	159.556	140.85	164.321	108.077	79.9526	127.398	130.026	0.682468	-0.551168	0.255951	-2.15341	0.0312866	0.295697	none
2674827	MGG_00314	MGG_00314T0	Lipase 4 [Source:UniProtKB/TrEMBL;Acc:G4NCZ9]	lipase 4	protein_coding	GO:0016787(hydrolase activity); GO:0008150(biological_process); GO:0005575(cellular_component)	NA	NA	NA	145.287	139.552	231.378	91.7632	123.127	119.436	141.757	0.650489	-0.620403	0.288123	-2.15326	0.0312986	0.295697	none
2681691	MGG_10080	NA	NA	uncharacterized protein	NA	NA	NA	NA	NA	15.5664	2.59632	16.9154	28.5486	23.9858	32.987	20.0999	2.44092	1.28743	0.59803	2.15278	0.0313359	0.295726	none
12987292	MGG_17821	NA	NA	uncharacterized protein	NA	NA	NA	NA	NA	12.972	14.9288	9.06181	26.5094	23.9858	23.8872	18.5575	2.00908	1.00653	0.467729	2.15196	0.0314006	0.296014	none
2674762	MGG_00940	MGG_00940T0	Tripeptidyl-peptidase 1 [Source:UniProtKB/TrEMBL;Acc:G4NDD7]	tripeptidyl-peptidase 1	protein_coding	GO:0006508(proteolysis); GO:0008236(serine-type peptidase activity); GO:0016787(hydrolase activity); GO:0004252(serine-type endopeptidase activity); GO:0008233(peptidase activity); GO:0008150(biological_process); GO:0005575(cellular_component); GO:0046872(metal ion binding); GO:0005615(extracellular space)	NA	K01279	ec:3.4.14.9	7.78322	6.4908	7.24945	18.3526	6.39621	29.5746	12.6412	2.57287	1.36338	0.633969	2.15054	0.0315122	0.296495	none
2675441	MGG_05237	MGG_05237T0	60S ribosomal protein L7 [Source:UniProtKB/TrEMBL;Acc:G4N5C7]	60S ribosomal protein L7	protein_coding	GO:0043581(obsolete mycelium development); GO:0006412(translation); GO:0003735(structural constituent of ribosome); GO:0005840(ribosome); GO:0022625(cytosolic large ribosomal subunit); GO:0000463(maturation of LSU-rRNA from tricistronic rRNA transcript (SSU-rRNA, 5.8S rRNA, LSU-rRNA))	03010(Ribosome)	K02937	NA	1448.33	1368.26	1658.92	1325.47	655.611	1051.04	1251.27	0.676951	-0.562876	0.261749	-2.15044	0.0315201	0.296495	none
2681547	MGG_02450	MGG_02450T0	Putative uncharacterized protein [Source:UniProtKB/TrEMBL;Acc:G4MRV9]	uncharacterized protein	protein_coding	GO:0006629(lipid metabolic process); GO:0008081(phosphoric diester hydrolase activity); GO:0005575(cellular_component); GO:0016020(membrane); GO:0016021(integral component of membrane)	NA	NA	NA	49.2937	98.011	82.1604	95.8416	140.717	130.811	99.4723	1.60777	0.685063	0.319104	2.14683	0.0318066	0.297572	none
2674940	MGG_00492	MGG_00492T0	Putative uncharacterized protein [Source:UniProtKB/TrEMBL;Acc:G4NBS8]	uncharacterized protein	protein_coding	GO:0003674(molecular_function); GO:0008150(biological_process); GO:0005575(cellular_component); GO:0005515(protein binding)	NA	NA	NA	60.3199	81.784	61.6203	85.6457	115.132	104.649	84.8584	1.50645	0.591154	0.275311	2.14722	0.0317759	0.297572	none
12985414	MGG_15769	NA	NA	uncharacterized protein	NA	NA	NA	NA	NA	196.526	133.71	120.824	218.193	233.462	207.022	184.956	1.45976	0.545732	0.25416	2.1472	0.0317771	0.297572	none
2677516	MGG_04242	MGG_04242T0	Bax Inhibitor family protein [Source:UniProtKB/TrEMBL;Acc:G4NFB0]	bax Inhibitor family protein	protein_coding	GO:0016021(integral component of membrane); GO:0043581(obsolete mycelium development); GO:0016020(membrane); GO:0003674(molecular_function); GO:0005575(cellular_component)	NA	K21890	NA	149.827	149.288	132.907	163.135	271.839	191.097	176.349	1.45194	0.537984	0.250587	2.14689	0.0318017	0.297572	none
2682026	MGG_10414	NA	NA	cholinesterase	NA	NA	NA	NA	NA	192.635	242.756	223.525	275.29	393.367	266.171	265.624	1.41794	0.5038	0.234518	2.14824	0.0316949	0.297572	none
2680413	MGG_09369	NA	NA	nuclear distribution protein pac-1a	NA	NA	00565(Ether lipid metabolism)	K16794	NA	73.9406	65.5571	86.9934	48.9404	43.1744	52.3243	61.8217	0.639548	-0.644875	0.300451	-2.14635	0.0318448	0.297608	none
12985855	MGG_15040	MGG_15040T0	Cytochrome P450 3A9 [Source:UniProtKB/TrEMBL;Acc:G4NK61]	cytochrome P450 3A9	protein_coding	GO:0046872(metal ion binding); GO:0009055(electron transfer activity); GO:0020037(heme binding); GO:0005506(iron ion binding); GO:0055114(oxidation-reduction process); GO:0004497(monooxygenase activity); GO:0016705(oxidoreductase activity, acting on paired donors, with incorporation or reduction of molecular oxygen); GO:0016020(membrane); GO:0016021(integral component of membrane)	NA	NA	NA	27.8899	15.5779	20.5401	44.862	35.1792	36.3995	30.0748	1.80734	0.853867	0.398303	2.14376	0.0320518	0.299219	none
5049679	MGG_11889	MGG_11889T0	T-complex protein 1 subunit epsilon [Source:UniProtKB/TrEMBL;Acc:G4MKA7]	T-complex protein 1 subunit epsilon	protein_coding	GO:0005737(cytoplasm); GO:0005524(ATP binding); GO:0000166(nucleotide binding); GO:0051082(unfolded protein binding); GO:0006457(protein folding); GO:0005832(chaperonin-containing T-complex); GO:0044267(cellular protein metabolic process)	NA	K09497	NA	215.984	213.547	276.687	189.644	153.509	163.798	202.195	0.715284	-0.483412	0.225589	-2.14289	0.0321217	0.299548	none
5050752	MGG_14657	NA	NA	uncharacterized protein	NA	NA	NA	NA	NA	12.3234	12.3325	14.4989	4.07836	3.1981	5.68742	8.68646	0.339867	-1.55696	0.72684	-2.14209	0.0321863	0.299828	none
5049035	MGG_13817	MGG_13817T0	DDHD domain-containing protein [Source:UniProtKB/TrEMBL;Acc:G4MKI7]	DDHD domain-containing protein	protein_coding	GO:0046872(metal ion binding)	NA	NA	NA	36.3217	33.7521	28.9978	44.862	59.1649	55.7367	43.1392	1.62433	0.699848	0.32682	2.14139	0.0322428	0.300031	none
2681280	MGG_02210	MGG_02210T0	Vanadium chloroperoxidase [Source:UniProtKB/TrEMBL;Acc:G4MPL3]	vanadium chloroperoxidase	protein_coding	GO:0016020(membrane); GO:0003824(catalytic activity); GO:0004601(peroxidase activity); GO:0055114(oxidation-reduction process); GO:0008150(biological_process); GO:0005575(cellular_component); GO:0098869(cellular oxidant detoxification)	NA	K17990	ec:1.11.1.10	1.2972	0	3.62472	2.03918	20.7877	4.54994	5.38312	5.52327	2.46552	1.15162	2.14091	0.0322813	0.300067	none
2677154	MGG_04040	MGG_04040T0	DEAH box polypeptide 37 [Source:UniProtKB/TrEMBL;Acc:G4NGS5]	DEAH box polypeptide 37	protein_coding	GO:0003676(nucleic acid binding); GO:0005524(ATP binding); GO:0004386(helicase activity); GO:0008026(GO_0008026); GO:0000166(nucleotide binding); GO:0016787(hydrolase activity); GO:0017111(nucleoside-triphosphatase activity); GO:0008150(biological_process); GO:0005575(cellular_component)	NA	K14780	ec:3.6.4.13	45.4021	35.0503	63.4327	26.5094	17.5896	32.987	36.8285	0.54144	-0.885125	0.413835	-2.13883	0.0324491	0.301303	none
5051510	MGG_13107	NA	NA	uncharacterized protein	NA	NA	NA	NA	NA	48.6451	62.9607	47.7255	65.2538	121.528	71.6615	69.6291	1.62402	0.699569	0.327547	2.13578	0.032697	0.303279	none
2676268	MGG_10746	NA	NA	uncharacterized protein	NA	NA	NA	NA	NA	3.24301	9.7362	11.4783	8.15673	30.382	23.8872	14.4806	2.58954	1.3727	0.643145	2.13435	0.0328141	0.303714	none
5049572	MGG_11785	NA	NA	60S ribosomal protein L15	NA	NA	03010(Ribosome)	K02877	NA	1695.44	1661	2061.86	1610.95	813.918	1266.02	1518.2	0.680716	-0.554874	0.259965	-2.13442	0.0328085	0.303714	none
2680170	MGG_09292	NA	NA	cystathionine gamma-synthase	NA	NA	00270(Cysteine and methionine metabolism); 00450(Selenocompound metabolism); 00920(Sulfur metabolism); 01230(Biosynthesis of amino acids)	K01739	ec:2.5.1.48	4.54021	5.84172	3.0206	6.11755	15.9905	14.7873	8.38298	2.82455	1.49802	0.702512	2.13238	0.032976	0.304863	none
2679202	MGG_01825	MGG_01825T0	Putative uncharacterized protein [Source:UniProtKB/TrEMBL;Acc:G4MW75]	uncharacterized protein	protein_coding	GO:0003674(molecular_function); GO:0008150(biological_process); GO:0005575(cellular_component)	NA	NA	NA	68.7518	110.344	98.4717	67.293	407.758	116.023	144.774	2.13116	1.09164	0.512545	2.12984	0.0331848	0.304863	none
2680869	MGG_09961	MGG_09961T0	WD-40 repeat family protein [Source:UniProtKB/TrEMBL;Acc:G4MRN6]	WD-40 repeat family protein	protein_coding	GO:0003674(molecular_function); GO:0005515(protein binding)	NA	NA	NA	42.8077	36.3485	31.4143	71.3714	55.9668	52.3243	48.3722	1.6102	0.687239	0.322546	2.13067	0.0331167	0.304863	none
12985349	MGG_15146	NA	NA	uncharacterized protein	NA	NA	NA	NA	NA	83.021	82.4331	63.4327	99.9199	139.118	102.374	95.0496	1.49262	0.577844	0.27118	2.13085	0.0331016	0.304863	none
2680896	MGG_09926	MGG_09926T0	Glucose-6-phosphate 1-dehydrogenase [Source:UniProtKB/TrEMBL;Acc:G4MR82]	glucose-6-phosphate 1-dehydrogenase	protein_coding	GO:0005737(cytoplasm); GO:0005975(carbohydrate metabolic process); GO:0000166(nucleotide binding); GO:0016491(oxidoreductase activity); GO:0006006(glucose metabolic process); GO:0042542(response to hydrogen peroxide); GO:0004345(glucose-6-phosphate dehydrogenase activity); GO:0006098(pentose-phosphate shunt); GO:0055114(oxidation-reduction process); GO:0050661(NADP binding); GO:0005575(cellular_c…	00030(Pentose phosphate pathway); 00480(Glutathione metabolism)	K00036	ec:1.1.1.49	408.619	388.799	315.351	411.915	730.767	480.018	455.911	1.45939	0.545363	0.255875	2.13137	0.033059	0.304863	none
2684793	MGG_11061	NA	NA	uncharacterized protein	NA	NA	NA	NA	NA	127.775	119.431	103.909	177.409	191.886	135.361	142.628	1.43018	0.516198	0.24234	2.13006	0.0331668	0.304863	none
2678947	MGG_08698	NA	NA	candidapepsin-8	NA	NA	NA	NA	NA	36.3217	38.9448	34.4349	18.3526	19.1886	22.7497	28.3321	0.556148	-0.84646	0.397424	-2.12987	0.0331826	0.304863	none
2674103	MGG_00517	MGG_00517T0	Pyridoxal kinase [Source:UniProtKB/TrEMBL;Acc:G4NBP8]	pyridoxal kinase	protein_coding	GO:0009443(pyridoxal 5'-phosphate salvage); GO:0016301(kinase activity); GO:0016310(phosphorylation); GO:0008478(pyridoxal kinase activity)	00750(Vitamin B6 metabolism); 01240(Biosynthesis of cofactors)	K00868	ec:2.7.1.35	71.3462	61.6626	64.0368	154.978	81.5517	81.8989	85.9123	1.59544	0.673953	0.316689	2.12813	0.0333266	0.305841	none
2679007	MGG_08785	MGG_08785T0	X-Pro dipeptidyl-peptidase [Source:UniProtKB/TrEMBL;Acc:G4NFL4]	X-Pro dipeptidyl-peptidase	protein_coding	GO:0006508(proteolysis); GO:0008152(metabolic process); GO:0016787(hydrolase activity); GO:0004177(aminopeptidase activity); GO:0008239(dipeptidyl-peptidase activity); GO:0005575(cellular_component)	NA	NA	NA	14.2692	9.08712	9.06181	24.4702	27.1839	17.0623	16.8558	2.09617	1.06776	0.502159	2.12634	0.0334753	0.30688	none
2683476	MGG_07556	MGG_07556T0	Putative uncharacterized protein [Source:UniProtKB/TrEMBL;Acc:G4N249]	uncharacterized protein	protein_coding	GO:0003674(molecular_function); GO:0008150(biological_process); GO:0005575(cellular_component)	NA	K20628	NA	7.13462	10.3853	15.103	18.3526	23.9858	26.1621	16.8539	2.11744	1.08232	0.509533	2.12415	0.0336579	0.307215	none
2683554	MGG_07634	NA	NA	beta-glucosidase 1	NA	NA	00460(Cyanoamino acid metabolism); 00500(Starch and sucrose metabolism)	K05349	ec:3.2.1.21	31.7815	42.8393	26.5813	40.7836	81.5517	52.3243	45.9769	1.7343	0.794349	0.373979	2.12405	0.0336659	0.307215	none
2677030	MGG_03178	MGG_03178T0	Putative uncharacterized protein [Source:UniProtKB/TrEMBL;Acc:G4NAE8]	uncharacterized protein	protein_coding	GO:0043581(obsolete mycelium development); GO:0003674(molecular_function); GO:0005575(cellular_component)	NA	NA	NA	44.7535	44.1374	52.5585	65.2538	94.3441	62.5616	60.6015	1.56671	0.647737	0.305001	2.12372	0.0336934	0.307215	none
2681506	MGG_02409	MGG_02409T0	Nonspecific lipid-transfer protein [Source:UniProtKB/TrEMBL;Acc:G4MRF5]	nonspecific lipid-transfer protein	protein_coding	GO:0008152(metabolic process); GO:0003824(catalytic activity); GO:0006633(fatty acid biosynthetic process); GO:0004315(3-oxoacyl-[acyl-carrier-protein] synthase activity); GO:0016747(transferase activity, transferring acyl groups other than amino-acyl groups); GO:0008150(biological_process); GO:0005575(cellular_component); GO:0016740(transferase activity); GO:0016746(transferase activity, transfe…	01040(Biosynthesis of unsaturated fatty acids); 01212(Fatty acid metabolism); 04146(Peroxisome)	K08764	ec:2.3.1.176	210.795	234.967	181.236	236.545	310.216	318.496	248.709	1.38585	0.470771	0.221565	2.12475	0.0336071	0.307215	none
12984222	MGG_16728	MGG_16728T0	Putative uncharacterized protein [Source:UniProtKB/TrEMBL;Acc:G4N4J6]	uncharacterized protein	protein_coding	GO:0043581(obsolete mycelium development); GO:0003674(molecular_function); GO:0005575(cellular_component)	NA	NA	NA	335.976	368.677	296.019	460.855	422.15	434.519	386.366	1.31591	0.396065	0.186487	2.12382	0.0336851	0.307215	none
2675111	MGG_00045	MGG_00045T0	Maltose permease MAL61 [Source:UniProtKB/TrEMBL;Acc:G4NEU2]	maltose permease MAL61	protein_coding	GO:0016021(integral component of membrane); GO:0006810(transport); GO:0055085(transmembrane transport); GO:0016020(membrane); GO:0005215(transporter activity); GO:0022891(GO_0022891); GO:0022857(transmembrane transporter activity)	NA	K08141	NA	1161	910.01	1128.5	927.828	761.149	701.828	931.718	0.745863	-0.423017	0.199222	-2.12335	0.0337248	0.307215	none
12984722	MGG_17864	NA	NA	glycosyl hydrolase family 88	NA	NA	NA	K15532	ec:3.2.1.172	126.477	103.853	92.4305	97.8808	57.5659	51.1868	88.2323	0.62872	-0.66951	0.315506	-2.12202	0.0338362	0.307906	none
5050843	MGG_11680	MGG_11680T0	AAA family ATPase [Source:UniProtKB/TrEMBL;Acc:G4NES4]	AAA family ATPase	protein_coding	GO:0005524(ATP binding); GO:0000166(nucleotide binding); GO:0017111(nucleoside-triphosphatase activity); GO:0008150(biological_process); GO:0005575(cellular_component)	NA	NA	NA	3.89161	1.94724	1.20824	2.03918	14.3915	10.2374	5.61918	3.89618	1.96206	0.925354	2.12034	0.0339776	0.308868	none
2682148	MGG_10547	MGG_10547T0	Ankyrin repeat domain-containing protein [Source:UniProtKB/TrEMBL;Acc:G4MKG0]	ankyrin repeat domain-containing protein	protein_coding	GO:0005515(protein binding)	NA	NA	NA	18.8094	18.8233	22.9566	22.431	70.3583	28.4371	30.3026	2.00315	1.00227	0.473417	2.1171	0.0342509	0.3107	none
2678807	MGG_08593	NA	NA	uncharacterized protein	NA	NA	NA	NA	NA	866.532	647.782	748.506	703.518	407.758	460.681	639.129	0.692728	-0.52964	0.250132	-2.11744	0.0342225	0.3107	none
2684740	MGG_06585	MGG_06585T0	Putative uncharacterized protein [Source:UniProtKB/TrEMBL;Acc:G4N6A7]	uncharacterized protein	protein_coding	GO:0050662(obsolete coenzyme binding); GO:0000166(nucleotide binding); GO:0003824(catalytic activity); GO:0044237(cellular metabolic process); GO:0005575(cellular_component); GO:0019748(secondary metabolic process)	NA	NA	NA	44.7535	25.9632	21.1442	44.862	71.9574	47.7743	42.7424	1.79519	0.844137	0.399801	2.11139	0.0347386	0.311814	none
2679918	MGG_08932	MGG_08932T0	Putative uncharacterized protein [Source:UniProtKB/TrEMBL;Acc:G4MW02]	uncharacterized protein	protein_coding	NA	NA	NA	NA	34.3759	32.454	33.2266	48.9404	60.764	50.0493	43.3017	1.59681	0.675194	0.319774	2.11147	0.0347317	0.311814	none
2675104	MGG_00595	MGG_00595T0	Putative uncharacterized protein [Source:UniProtKB/TrEMBL;Acc:G4NB98]	uncharacterized protein	protein_coding	GO:0043581(obsolete mycelium development); GO:0046983(protein dimerization activity)	NA	NA	NA	69.4004	76.5914	63.4327	69.3322	155.108	106.924	90.1314	1.5915	0.670384	0.317599	2.11079	0.0347908	0.311814	none
2675411	MGG_05062	MGG_05062T0	Putative uncharacterized protein [Source:UniProtKB/TrEMBL;Acc:G4N448]	uncharacterized protein	protein_coding	GO:0016021(integral component of membrane); GO:0003674(molecular_function); GO:0008150(biological_process); GO:0016020(membrane)	04146(Peroxisome)	K13348	NA	67.4546	45.4356	45.9132	81.5673	102.339	68.2491	68.4932	1.58181	0.661577	0.313017	2.11355	0.034554	0.311814	none
2683918	MGG_06057	MGG_06057T0	Multispanning membrane protein [Source:UniProtKB/TrEMBL;Acc:G4N4Z0]	multispanning membrane protein	protein_coding	GO:0016021(integral component of membrane); GO:0016020(membrane)	NA	K17086	NA	130.369	147.99	122.032	169.252	185.49	193.372	158.084	1.37346	0.457812	0.216815	2.11154	0.0347262	0.311814	none
2675189	MGG_00729	MGG_00729T0	Putative uncharacterized protein [Source:UniProtKB/TrEMBL;Acc:G4NEW6]	uncharacterized protein	protein_coding	GO:0003677(DNA binding); GO:0006355(regulation of transcription, DNA-templated); GO:0003700(DNA-binding transcription factor activity)	NA	NA	NA	221.173	193.426	248.898	346.661	273.438	287.784	261.897	1.36414	0.447989	0.211869	2.11447	0.0344755	0.311814	none
2682984	MGG_07099	MGG_07099T0	Putative uncharacterized protein [Source:UniProtKB/TrEMBL;Acc:G4MSR4]	uncharacterized protein	protein_coding	GO:0003676(nucleic acid binding); GO:0005524(ATP binding); GO:0004386(helicase activity); GO:0043581(obsolete mycelium development); GO:0008026(GO_0008026); GO:0000166(nucleotide binding); GO:0016787(hydrolase activity); GO:0008150(biological_process); GO:0005575(cellular_component)	NA	K17679	ec:3.6.4.13	164.096	151.236	193.923	140.704	84.7498	122.848	142.926	0.681661	-0.552875	0.26195	-2.11061	0.0348061	0.311814	none
2683169	MGG_12370	MGG_12370T0	MKI67 FHA domain-interacting nucleolar phosphoprotein [Source:UniProtKB/TrEMBL;Acc:G4MTM5]	MKI67 FHA domain-interacting nucleolar phosphoprotein	protein_coding	GO:0003676(nucleic acid binding); GO:0043581(obsolete mycelium development); GO:0000166(nucleotide binding); GO:0005575(cellular_component); GO:0003723(RNA binding)	NA	K14838	NA	113.505	96.7129	110.554	85.6457	63.9621	70.524	90.1507	0.681499	-0.553216	0.261832	-2.11286	0.0346124	0.311814	none
2677376	MGG_04324	MGG_04324T0	Putative uncharacterized protein [Source:UniProtKB/TrEMBL;Acc:G4NGG0]	uncharacterized protein	protein_coding	GO:0005515(protein binding)	NA	NA	NA	108.316	88.9239	133.511	81.5673	52.7687	79.6239	90.7852	0.646589	-0.629079	0.297866	-2.11195	0.0346907	0.311814	none
2676887	MGG_03336	MGG_03336T0	LEA domain-containing protein [Source:UniProtKB/TrEMBL;Acc:G4N953]	LEA domain-containing protein	protein_coding	GO:0003674(molecular_function); GO:0005575(cellular_component); GO:0007275(multicellular organism development)	NA	NA	NA	61.6171	16.227	6.04121	2.03918	15.9905	5.68742	17.9337	0.285979	-1.80602	0.854971	-2.11237	0.0346544	0.311814	none
2683794	MGG_07867	NA	NA	uncharacterized protein	NA	NA	NA	NA	NA	8.43182	15.5779	6.64533	4.07836	0	3.41245	6.35765	0.243807	-2.03619	0.963312	-2.11374	0.0345376	0.311814	none
2680397	MGG_09445	NA	NA	uncharacterized protein	NA	NA	NA	NA	NA	12.972	31.8049	3.62472	0	7.99526	3.41245	9.96823	0.243717	-2.03672	0.964536	-2.11161	0.0347203	0.311814	none
5050431	MGG_12548	NA	NA	uncharacterized protein	NA	NA	NA	NA	NA	31.1329	24.016	21.7483	16.3135	3.1981	14.7873	18.5327	0.445959	-1.16502	0.552395	-2.10903	0.0349422	0.312709	none
2676935	MGG_03213	MGG_03213T0	Putative uncharacterized protein [Source:UniProtKB/TrEMBL;Acc:G4N9Z5]	uncharacterized protein	protein_coding	NA	NA	NA	NA	1.9458	3.2454	3.62472	4.07836	12.7924	11.3748	6.17693	3.27703	1.71239	0.812906	2.1065	0.0351606	0.312759	none
2678564	MGG_08266	MGG_08266T0	Maltose permease MAL61 [Source:UniProtKB/TrEMBL;Acc:G4MXB4]	maltose permease MAL61	protein_coding	GO:0016021(integral component of membrane); GO:0006810(transport); GO:0055085(transmembrane transport); GO:0016020(membrane); GO:0005215(transporter activity); GO:0022891(GO_0022891); GO:0022857(transmembrane transporter activity)	NA	K08141	NA	408.619	349.205	459.132	383.366	231.863	219.534	341.953	0.681692	-0.552808	0.262307	-2.10748	0.0350759	0.312759	none
2677794	MGG_04467	MGG_04467T0	60S acidic ribosomal protein P0 [Source:UniProtKB/TrEMBL;Acc:G4MKJ9]	60S acidic ribosomal protein P0	protein_coding	GO:0042254(ribosome biogenesis); GO:0030529(GO_0030529); GO:0003735(structural constituent of ribosome); GO:0005840(ribosome); GO:0006414(translational elongation); GO:0005622(intracellular); GO:0070180(large ribosomal subunit rRNA binding); GO:0000027(ribosomal large subunit assembly); GO:0002181(cytoplasmic translation); GO:0005737(cytoplasm); GO:0022625(cytosolic large ribosomal subunit)	03010(Ribosome)	K02941	NA	2181.9	2084.84	2423.13	2086.08	994.611	1461.67	1872.04	0.678454	-0.559676	0.265731	-2.10617	0.0351893	0.312759	none
2684604	MGG_06449	NA	NA	uncharacterized protein	NA	NA	NA	NA	NA	87.5612	82.4331	106.929	44.862	62.363	70.524	75.7788	0.651058	-0.619141	0.293983	-2.10604	0.0352007	0.312759	none
2680041	MGG_09061	MGG_09061T0	Putative uncharacterized protein [Source:UniProtKB/TrEMBL;Acc:G4NK58]	uncharacterized protein	protein_coding	GO:0003674(molecular_function); GO:0008150(biological_process); GO:0005575(cellular_component); GO:0016020(membrane); GO:0016021(integral component of membrane)	NA	NA	NA	42.1591	44.7865	60.4121	32.6269	20.7877	31.8496	38.7703	0.578453	-0.789729	0.374852	-2.10677	0.0351373	0.312759	none
2679541	MGG_01195	MGG_01195T0	Acetylesterase [Source:UniProtKB/TrEMBL;Acc:G4MWY4]	acetylesterase	protein_coding	GO:0016787(hydrolase activity)	NA	NA	NA	18.8094	29.8577	19.936	10.1959	14.3915	6.82491	16.6692	0.448813	-1.15582	0.548524	-2.10714	0.0351058	0.312759	none
NA	MGG_20301	NA	NA	NA	NA	NA	NA	NA	NA	21.4039	14.2798	12.0824	2.03918	7.99526	6.82491	10.7709	0.368792	-1.43912	0.682733	-2.10788	0.0350411	0.312759	none
5051652	MGG_13499	NA	NA	acetyl-CoA acetyltransferase	NA	NA	00071(Fatty acid degradation); 00280(Valine, leucine and isoleucine degradation); 00310(Lysine degradation); 00380(Tryptophan metabolism); 00620(Pyruvate metabolism); 00630(Glyoxylate and dicarboxylate metabolism); 00650(Butanoate metabolism); 00900(Terpenoid backbone biosynthesis)	K00626	ec:2.3.1.9	147.881	151.885	156.467	108.077	121.528	98.9611	130.8	0.717849	-0.478248	0.227153	-2.1054	0.0352563	0.312932	none
2681886	MGG_10266	NA	NA	uncharacterized protein	NA	NA	NA	NA	NA	11.0262	6.4908	10.2701	18.3526	19.1886	21.6122	14.4901	2.14029	1.0978	0.521875	2.10358	0.0354155	0.314022	none
2678134	MGG_04657	MGG_04657T0	General alpha-glucoside permease [Source:UniProtKB/TrEMBL;Acc:G4MT99]	general alpha-glucoside permease	protein_coding	GO:0016021(integral component of membrane); GO:0006810(transport); GO:0055085(transmembrane transport); GO:0016020(membrane); GO:0022891(GO_0022891); GO:0022857(transmembrane transporter activity)	NA	K08141	NA	269.818	203.811	257.96	234.506	132.721	95.5487	199.061	0.625457	-0.677017	0.322026	-2.10237	0.0355208	0.314633	none
2682613	MGG_03060	MGG_03060T0	Myosin type II heavy chain [Source:UniProtKB/TrEMBL;Acc:G4NKK3]	myosin type II heavy chain	protein_coding	GO:0005524(ATP binding); GO:0000166(nucleotide binding); GO:0016459(myosin complex); GO:0003774(motor activity); GO:0003779(actin binding); GO:0051015(actin filament binding)	NA	K10352	NA	67.4546	73.9951	72.4945	53.0187	38.3773	47.7743	58.8524	0.648049	-0.625826	0.297859	-2.10108	0.0356336	0.31531	none
2675925	MGG_05692	MGG_05692T0	Putative uncharacterized protein [Source:UniProtKB/TrEMBL;Acc:G4MP30]	uncharacterized protein	protein_coding	GO:0016020(membrane); GO:0016021(integral component of membrane)	NA	NA	NA	121.937	116.185	65.8492	154.978	134.32	177.448	128.453	1.54026	0.623174	0.296836	2.09939	0.0357826	0.316305	none
2678354	MGG_08139	NA	NA	methionine aminopeptidase 1; methionine aminopeptidase 1, variant	NA	NA	NA	K01265	ec:3.4.11.18	156.313	139.552	174.591	101.959	124.726	106.924	134.011	0.709554	-0.495016	0.235949	-2.09798	0.0359072	0.317083	none
2684443	MGG_06288	MGG_06288T0	Putative uncharacterized protein [Source:UniProtKB/TrEMBL;Acc:G4N879]	uncharacterized protein	protein_coding	GO:0005789(endoplasmic reticulum membrane); GO:0006506(GPI anchor biosynthetic process); GO:0003674(molecular_function); GO:0016020(membrane); GO:0016021(integral component of membrane); GO:0005783(endoplasmic reticulum); GO:0097502(mannosylation); GO:0000030(mannosyltransferase activity)	NA	NA	NA	47.3479	49.3301	44.1008	75.4497	75.1555	63.6991	59.1805	1.51408	0.598439	0.285319	2.09744	0.0359544	0.317175	none
2677385	MGG_03793	MGG_03793T0	2,3-dihydroxybenzoic acid decarboxylase [Source:UniProtKB/TrEMBL;Acc:G4NHM3]	2,3-dihydroxybenzoic acid decarboxylase	protein_coding	GO:0008152(metabolic process); GO:0003824(catalytic activity); GO:0005575(cellular_component); GO:0016787(hydrolase activity); GO:0016829(lyase activity); GO:0016831(carboxy-lyase activity)	NA	K14333	ec:4.1.1.46	72.6434	64.908	61.0162	40.7836	35.1792	48.9118	53.907	0.634892	-0.655416	0.312683	-2.0961	0.0360729	0.317897	none
2682675	MGG_02787	MGG_02787T0	Putative uncharacterized protein [Source:UniProtKB/TrEMBL;Acc:G5EGW9]	uncharacterized protein	protein_coding	GO:0000166(nucleotide binding); GO:0080019(fatty-acyl-CoA reductase (alcohol-forming) activity); GO:0005575(cellular_component); GO:0016491(oxidoreductase activity); GO:0055114(oxidation-reduction process); GO:0006629(lipid metabolic process); GO:0102965(alcohol-forming fatty acyl-CoA reductase activity)	00073(Cutin, suberine and wax biosynthesis); 04146(Peroxisome)	K13356	ec:1.2.1.84	14.9178	21.4196	16.3113	32.6269	38.3773	26.1621	24.9692	1.83188	0.873327	0.417113	2.09374	0.0362829	0.319361	none
2683365	MGG_07445	NA	NA	uncharacterized protein; hypothetical protein, variant	NA	NA	NA	NA	NA	75.2378	74.6442	71.2862	118.273	102.339	97.8236	89.934	1.43185	0.517877	0.247385	2.09341	0.0363129	0.319361	none
2678254	MGG_08112	NA	NA	uncharacterized protein	NA	NA	NA	NA	NA	102.479	86.3276	92.4305	108.077	167.9	130.811	114.671	1.45117	0.537219	0.25671	2.09271	0.0363753	0.319368	none
2681559	MGG_02462	MGG_02462T0	U6 snRNA-associated Sm-like protein LSm5 [Source:UniProtKB/TrEMBL;Acc:G4MRX5]	U6 snRNA-associated Sm-like protein LSm5	protein_coding	GO:0003674(molecular_function); GO:0006397(mRNA processing); GO:0005634(nucleus); GO:0003723(RNA binding); GO:0008380(RNA splicing); GO:0005681(spliceosomal complex)	03018(RNA degradation); 03040(Spliceosome)	K12624	NA	74.5892	68.8025	83.9728	46.9012	47.9716	53.4618	62.6165	0.655845	-0.608572	0.290854	-2.09236	0.0364062	0.319368	none
2675554	MGG_05095	MGG_05095T0	Nucleoporin Nup157/170 [Source:UniProtKB/TrEMBL;Acc:G4N4E4]	nucleoporin Nup157/170	protein_coding	GO:0005643(nuclear pore); GO:0006913(nucleocytoplasmic transport); GO:0017056(structural constituent of nuclear pore); GO:0005634(nucleus)	03013(Nucleocytoplasmic transport)	K14312	NA	116.1	107.747	159.488	61.1755	83.1507	102.374	105.006	0.651529	-0.6181	0.295436	-2.09216	0.0364243	0.319368	none
2681902	MGG_10327	NA	NA	uncharacterized protein	NA	NA	NA	NA	NA	425.483	487.459	756.963	519.991	1427.95	836.051	742.317	1.66795	0.738078	0.353162	2.08991	0.0366257	0.320809	none
2681593	MGG_02496	MGG_02496T0	Methionine-R-sulfoxide reductase B2 [Source:UniProtKB/TrEMBL;Acc:G4MK90]	methionine-R-sulfoxide reductase B2	protein_coding	GO:0006979(response to oxidative stress); GO:0030091(protein repair); GO:0016671(oxidoreductase activity, acting on a sulfur group of donors, disulfide as acceptor); GO:0033743(peptide-methionine (R)-S-oxide reductase activity); GO:0055114(oxidation-reduction process); GO:0008113(peptide-methionine (S)-S-oxide reductase activity); GO:0046872(metal ion binding); GO:0016491(oxidoreductase activity)	NA	K07305	ec:1.8.4.12	62.2657	64.908	59.8079	91.7632	116.731	73.9365	78.2354	1.50215	0.587027	0.281366	2.08635	0.0369472	0.323297	none
2683249	MGG_07127	NA	NA	uncharacterized protein	NA	NA	NA	NA	NA	22.0525	19.4724	22.9566	20.3918	52.7687	43.2244	30.1444	1.83287	0.874104	0.419081	2.08576	0.0370001	0.323434	none
2674703	MGG_00916	MGG_00916T0	Putative uncharacterized protein [Source:UniProtKB/TrEMBL;Acc:G4NDH1]	uncharacterized protein	protein_coding	GO:0003676(nucleic acid binding); GO:0008270(zinc ion binding); GO:0005622(intracellular); GO:0003674(molecular_function); GO:0008150(biological_process); GO:0005575(cellular_component)	NA	NA	NA	4.54021	3.2454	15.7071	40.7836	15.9905	11.3748	15.2736	2.81819	1.49477	0.717094	2.08448	0.0371168	0.324126	none
2681470	MGG_02373	MGG_02373T0	Arabinan endo-1,5-alpha-L-arabinosidase A [Source:UniProtKB/TrEMBL;Acc:G4MQZ5]	arabinan endo-1,5-alpha-L-arabinosidase A	protein_coding	GO:0005975(carbohydrate metabolic process); GO:0004553(hydrolase activity, hydrolyzing O-glycosyl compounds); GO:0031222(arabinan catabolic process); GO:0046558(arabinan endo-1,5-alpha-L-arabinosidase activity); GO:0005575(cellular_component); GO:0016787(hydrolase activity); GO:0008152(metabolic process); GO:0016798(hydrolase activity, acting on glycosyl bonds)	NA	K06113	ec:3.2.1.99	11.0262	18.8233	19.936	2.03918	7.99526	7.96239	11.2971	0.37971	-1.39703	0.670458	-2.0837	0.0371877	0.324418	none
2681104	MGG_01985	MGG_01985T0	Delta(12) fatty acid desaturase [Source:UniProtKB/TrEMBL;Acc:G4MMC5]	Delta(12) fatty acid desaturase	protein_coding	GO:0006629(lipid metabolic process); GO:0055114(oxidation-reduction process); GO:0016717(oxidoreductase activity, acting on paired donors, with oxidation of a pair of donors resulting in the reduction of molecular oxygen to two molecules of water)	01040(Biosynthesis of unsaturated fatty acids); 01212(Fatty acid metabolism)	K10256	ec:1.14.19.6	364.514	493.95	528.606	385.405	230.264	343.52	391.043	0.690683	-0.533905	0.25635	-2.08272	0.0372771	0.324871	none
2679308	MGG_01607	MGG_01607T0	Calnexin [Source:UniProtKB/TrEMBL;Acc:G4MTZ0]	calnexin	protein_coding	GO:0043581(obsolete mycelium development); GO:0005783(endoplasmic reticulum); GO:0005509(calcium ion binding); GO:0051082(unfolded protein binding); GO:0006457(protein folding); GO:0016020(membrane); GO:0016021(integral component of membrane); GO:0005515(protein binding)	04141(Protein processing in endoplasmic reticulum); 04145(Phagosome)	K08054	NA	788.699	710.093	679.636	923.75	927.45	904.3	822.321	1.26476	0.338865	0.16284	2.08097	0.0374363	0.325929	none
2683180	MGG_07197	NA	NA	AMP-binding enzyme	NA	NA	00061(Fatty acid biosynthesis); 00071(Fatty acid degradation); 01212(Fatty acid metabolism); 04146(Peroxisome)	K01897	ec:6.2.1.3	334.03	288.84	303.269	342.583	548.475	395.845	368.84	1.39095	0.476071	0.229026	2.07868	0.0376467	0.326786	none
2680823	MGG_09866	NA	NA	flagellar associated protein	NA	NA	00230(Purine metabolism); 00240(Pyrimidine metabolism); 00760(Nicotinate and nicotinamide metabolism)	K01081	ec:3.1.3.5	92.1014	86.3276	102.096	73.4106	52.7687	63.6991	78.4006	0.673316	-0.570645	0.274468	-2.0791	0.0376083	0.326786	none
12984908	MGG_15027	NA	NA	sulfate adenylyltransferase	NA	NA	00230(Purine metabolism); 00261(Monobactam biosynthesis); 00450(Selenocompound metabolism); 00920(Sulfur metabolism)	K00958	ec:2.7.7.4	131.666	64.2589	142.572	55.0579	71.9574	75.074	90.0978	0.600646	-0.735413	0.353791	-2.07867	0.0376479	0.326786	none
2683702	MGG_07775	MGG_07775T0	Putative uncharacterized protein [Source:UniProtKB/TrEMBL;Acc:G4N108]	uncharacterized protein	protein_coding	GO:0003674(molecular_function); GO:0008150(biological_process); GO:0005575(cellular_component)	NA	NA	NA	22.0525	23.3669	32.6225	20.3918	11.1934	6.82491	19.4087	0.466888	-1.09885	0.529049	-2.07703	0.0377986	0.327765	none
2674092	MGG_00842	MGG_00842T0	Putative uncharacterized protein [Source:UniProtKB/TrEMBL;Acc:G4NE18]	uncharacterized protein	protein_coding	NA	NA	K14860	NA	25.2955	42.1902	32.6225	22.431	17.5896	13.6498	25.6298	0.523758	-0.933029	0.449365	-2.07633	0.0378636	0.328	none
2675901	MGG_05715	MGG_05715T0	Verprolin [Source:UniProtKB/TrEMBL;Acc:G4MPG0]	verprolin	protein_coding	GO:0043581(obsolete mycelium development); GO:0008152(metabolic process); GO:0032259(methylation); GO:0008168(methyltransferase activity); GO:0003674(molecular_function); GO:0005575(cellular_component)	NA	NA	NA	142.044	162.27	132.907	150.899	236.66	233.184	176.327	1.4287	0.514701	0.248041	2.07506	0.0379809	0.328687	none
2675895	MGG_05552	MGG_05552T0	Putative uncharacterized protein [Source:UniProtKB/TrEMBL;Acc:G4MMN9]	uncharacterized protein	protein_coding	GO:0003674(molecular_function); GO:0005575(cellular_component)	NA	NA	NA	29.1871	22.0687	28.3937	40.7836	47.9716	43.2244	35.2715	1.6588	0.730142	0.352186	2.07317	0.0381563	0.329546	none
2677805	MGG_04410	MGG_04410T0	Origin recognition complex subunit [Source:UniProtKB/TrEMBL;Acc:G4MZE6]	origin recognition complex subunit	protein_coding	GO:0003677(DNA binding); GO:0006260(DNA replication); GO:0005664(nuclear origin of replication recognition complex); GO:0005634(nucleus)	04111(Cell cycle - yeast); 04113(Meiosis - yeast)	K02605	NA	20.1066	11.6834	20.5401	8.15673	3.1981	9.09987	12.1308	0.395675	-1.33761	0.645154	-2.07332	0.0381425	0.329546	none
2674231	MGG_01087	MGG_01087T0	Ribosome biogenesis protein TSR1 [Source:UniProtKB/TrEMBL;Acc:G4NCG9]	ribosome biogenesis protein TSR1	protein_coding	GO:0005737(cytoplasm); GO:0043581(obsolete mycelium development); GO:0005634(nucleus); GO:0005730(nucleolus); GO:0042254(ribosome biogenesis); GO:0006364(rRNA processing); GO:0043021(ribonucleoprotein complex binding)	NA	K14799	NA	156.313	99.3092	128.678	97.8808	78.3536	83.0364	107.262	0.671582	-0.574365	0.277511	-2.0697	0.0384802	0.332011	none
12984277	MGG_15225	MGG_15225T0	Putative uncharacterized protein [Source:UniProtKB/TrEMBL;Acc:G4N0G0]	uncharacterized protein	protein_coding	NA	NA	NA	NA	0.648602	3.89448	3.62472	2.03918	12.7924	14.7873	6.29778	3.73429	1.90083	0.918914	2.06857	0.0385868	0.332049	none
2678490	MGG_08389	MGG_08389T0	Putative uncharacterized protein [Source:UniProtKB/TrEMBL;Acc:G4MVZ5]	uncharacterized protein	protein_coding	GO:0000166(nucleotide binding); GO:0008152(metabolic process); GO:0016491(oxidoreductase activity); GO:0055114(oxidation-reduction process); GO:0005575(cellular_component)	NA	NA	NA	17.5122	20.7706	21.7483	10.1959	4.79716	11.3748	14.3998	0.444429	-1.16997	0.565627	-2.06846	0.0385972	0.332049	none
5049245	MGG_14113	MGG_14113T0	Putative uncharacterized protein [Source:UniProtKB/TrEMBL;Acc:G4MXE0]	uncharacterized protein	protein_coding	NA	NA	NA	NA	31.7815	32.454	11.4783	6.11755	9.59431	14.7873	17.7022	0.418549	-1.25653	0.607481	-2.06843	0.0385997	0.332049	none
2685091	MGG_06918	MGG_06918T0	Putative uncharacterized protein [Source:UniProtKB/TrEMBL;Acc:G4MN20]	uncharacterized protein	protein_coding	NA	NA	NA	NA	108.316	129.816	82.1604	142.743	222.268	127.398	135.45	1.53569	0.618888	0.299283	2.0679	0.0386494	0.332147	none
2682448	MGG_02895	MGG_02895T0	Putative uncharacterized protein [Source:UniProtKB/TrEMBL;Acc:G4NLN4]	uncharacterized protein	protein_coding	GO:0016787(hydrolase activity); GO:0016311(dephosphorylation); GO:0004725(protein tyrosine phosphatase activity); GO:0004721(phosphoprotein phosphatase activity); GO:0016791(phosphatase activity); GO:0035335(peptidyl-tyrosine dephosphorylation)	NA	NA	NA	49.9423	59.0663	49.5379	85.6457	91.146	64.8366	66.6958	1.51226	0.596709	0.288677	2.06705	0.0387294	0.332504	none
5051619	MGG_14344	MGG_14344T0	Putative uncharacterized protein [Source:UniProtKB/TrEMBL;Acc:G5EH10]	uncharacterized protein	protein_coding	GO:0043581(obsolete mycelium development); GO:0016787(hydrolase activity); GO:0003674(molecular_function); GO:0008150(biological_process); GO:0005575(cellular_component)	NA	K07766	ec:3.6.1.52	3.24301	5.84172	14.4989	24.4702	14.3915	20.4747	13.82	2.49096	1.3167	0.637302	2.06606	0.0388229	0.33285	none
2685163	MGG_11784	NA	NA	uncharacterized protein	NA	NA	NA	NA	NA	94.6958	97.362	85.181	118.273	177.495	111.473	114.08	1.467	0.552864	0.267626	2.06581	0.0388467	0.33285	none
12985972	MGG_14892	MGG_14892T0	Putative uncharacterized protein [Source:UniProtKB/TrEMBL;Acc:G4NGH3]	uncharacterized protein	protein_coding	NA	NA	NA	NA	25.9441	49.9791	23.5607	55.0579	63.9621	53.4618	45.3276	1.73444	0.794468	0.384807	2.06459	0.0389617	0.333177	none
2676126	MGG_05599	MGG_05599T0	Beta-glucosidase 1 [Source:UniProtKB/TrEMBL;Acc:G4MN54]	beta-glucosidase 1	protein_coding	GO:0005975(carbohydrate metabolic process); GO:0008152(metabolic process); GO:0016787(hydrolase activity); GO:0004553(hydrolase activity, hydrolyzing O-glycosyl compounds); GO:0030245(cellulose catabolic process); GO:0016798(hydrolase activity, acting on glycosyl bonds); GO:0000272(polysaccharide catabolic process); GO:0008422(beta-glucosidase activity); GO:0102483(scopolin beta-glucosidase activ…	00460(Cyanoamino acid metabolism); 00500(Starch and sucrose metabolism)	K05349	ec:3.2.1.21	65.5088	70.7497	86.3893	53.0187	44.7735	47.7743	61.369	0.650832	-0.619643	0.300097	-2.06481	0.0389414	0.333177	none
5048945	MGG_09575	MGG_09575T0	Putative uncharacterized protein [Source:UniProtKB/TrEMBL;Acc:G4N0X7]	uncharacterized protein	protein_coding	GO:0005975(carbohydrate metabolic process); GO:0003824(catalytic activity); GO:0048038(quinone binding); GO:0016901(oxidoreductase activity, acting on the CH-OH group of donors, quinone or similar compound as acceptor); GO:0016020(membrane); GO:0016021(integral component of membrane)	NA	NA	NA	18.1608	22.0687	14.4989	30.5877	36.7782	30.7121	25.4677	1.79395	0.843136	0.408533	2.06381	0.0390355	0.333478	none
2684024	MGG_05951	MGG_05951T0	Putative uncharacterized protein [Source:UniProtKB/TrEMBL;Acc:G4N4B2]	uncharacterized protein	protein_coding	GO:0043581(obsolete mycelium development); GO:0003674(molecular_function); GO:0005575(cellular_component)	NA	NA	NA	27.8899	33.1031	38.0596	20.3918	105.537	67.1116	48.6822	1.96682	0.975864	0.473311	2.06178	0.0392286	0.334468	none
2683545	MGG_07625	NA	NA	uncharacterized protein	NA	NA	NA	NA	NA	41.5105	32.454	53.7667	75.4497	60.764	67.1116	55.1761	1.58473	0.664236	0.322154	2.06186	0.0392211	0.334468	none
12985223	MGG_16204	MGG_16204T0	60S ribosomal protein L12 [Source:UniProtKB/TrEMBL;Acc:G4MMY9]	60S ribosomal protein L12	protein_coding	GO:0006412(translation); GO:0030529(GO_0030529); GO:0003735(structural constituent of ribosome); GO:0005840(ribosome)	03010(Ribosome)	K02870	NA	1260.88	1244.29	1670.39	1290.8	646.017	904.3	1169.45	0.679582	-0.557279	0.270509	-2.06011	0.0393878	0.335494	none
5048725	MGG_14279	MGG_14279T0	Glutamine synthetase [Source:UniProtKB/TrEMBL;Acc:G4NG12]	glutamine synthetase	protein_coding	GO:0005737(cytoplasm); GO:0005524(ATP binding); GO:0000166(nucleotide binding); GO:0003824(catalytic activity); GO:0006807(nitrogen compound metabolic process); GO:0016874(ligase activity); GO:0006542(glutamine biosynthetic process); GO:0004356(glutamate-ammonia ligase activity); GO:0005575(cellular_component)	00220(Arginine biosynthesis); 00250(Alanine, aspartate and glutamate metabolism); 00630(Glyoxylate and dicarboxylate metabolism); 00910(Nitrogen metabolism); 01230(Biosynthesis of amino acids)	K01915	ec:6.3.1.2	581.796	590.663	552.77	938.024	586.852	828.089	679.699	1.36291	0.446689	0.216929	2.05915	0.0394798	0.335926	none
2678306	MGG_08190	NA	NA	60S ribosomal protein L4-A	NA	NA	03010(Ribosome)	K02930	NA	1169.43	1058	1424.52	1137.86	628.428	782.589	1033.47	0.69684	-0.521101	0.253112	-2.05877	0.0395161	0.335926	none
2677214	MGG_03823	MGG_03823T0	NADH oxidase [Source:UniProtKB/TrEMBL;Acc:G4NHJ3]	NADH oxidase	protein_coding	GO:0043581(obsolete mycelium development); GO:0003824(catalytic activity); GO:0016491(oxidoreductase activity); GO:0055114(oxidation-reduction process); GO:0010181(FMN binding); GO:0005575(cellular_component)	NA	NA	NA	36.3217	27.9104	30.206	77.4889	60.764	30.7121	43.9005	1.75434	0.810928	0.394139	2.05747	0.0396414	0.336229	none
2678754	MGG_08452	NA	NA	uncharacterized protein	NA	NA	NA	NA	NA	22.7011	38.9448	34.4349	38.7445	71.9574	52.3243	43.1845	1.70574	0.770396	0.374792	2.05553	0.0398276	0.336229	none
2679292	MGG_01651	MGG_01651T0	Transmembrane 14C domain-containing protein [Source:UniProtKB/TrEMBL;Acc:G4MUE2]	transmembrane 14C domain-containing protein	protein_coding	GO:0016021(integral component of membrane); GO:0003674(molecular_function); GO:0005575(cellular_component)	NA	NA	NA	62.9143	77.2405	59.8079	67.293	150.311	98.9611	86.088	1.5912	0.670112	0.325836	2.05659	0.0397254	0.336229	none
2679819	MGG_08833	MGG_08833T0	Putative uncharacterized protein [Source:UniProtKB/TrEMBL;Acc:G4MV30]	uncharacterized protein	protein_coding	GO:0016020(membrane); GO:0016021(integral component of membrane)	NA	NA	NA	92.1014	70.1006	60.4121	106.037	132.721	95.5487	92.8203	1.49904	0.584039	0.284281	2.05445	0.0399325	0.336229	none
[truncated: 9,982 more rows]
