# Supplementary material for: Autophagy-dependent TOR reactivation drives fungal growth in living host rice cells
Source: Research Square preprint supplement (doi:10.21203/rs.3.rs-1344614/v1), 2022-03-02
Supplement: Supplementary file 3 [file f0a88337e8b13977ed9b7c76.xlsx]

## Sheet: Sheet1
Supplementary Table 7. Metabolomic analysis of ∆rim15 and Guy11 vegetative hyphae after growth on minimal media with glutamine as a sole carbon and nitrogen source.
Original Filename	F:\Analyst Data\Projects\RBC\Data\052621-R-Wilson-GSH.wiff (sample 43)	F:\Analyst Data\Projects\RBC\Data\052621-R-Wilson-GSH.wiff (sample 44)	F:\Analyst Data\Projects\RBC\Data\052621-R-Wilson-GSH.wiff (sample 45)	F:\Analyst Data\Projects\RBC\Data\052621-R-Wilson-GSH.wiff (sample 46)	F:\Analyst Data\Projects\RBC\Data\052621-R-Wilson-GSH.wiff (sample 47)	F:\Analyst Data\Projects\RBC\Data\052621-R-Wilson-GSH.wiff (sample 48)	F:\Analyst Data\Projects\RBC\Data\052621-R-Wilson-GSH.wiff (sample 49)	F:\Analyst Data\Projects\RBC\Data\052621-R-Wilson-GSH.wiff (sample 50)	F:\Analyst Data\Projects\RBC\Data\052621-R-Wilson-GSH.wiff (sample 42)
Sample Name	LC-H2O	∆rim15-R1	∆rim15-R2	∆rim15-R3	LC-H2O	Guy11-R1	Guy11-R2	Guy11-R3	10uM-A9906-2
Acquisition Date & Time	2021-06-11 15:48:46	2021-06-11 16:30:04	2021-06-11 17:11:18	2021-06-11 17:52:24	2021-06-11 18:33:38	2021-06-11 19:14:48	2021-06-11 19:56:10	2021-06-11 20:37:37	2021-06-11 15:07:21
Vial Number	1	71	72	73	1	74	75	76	3
Injection Volume	2	2	2	2	2	2	2	2	2
Acq. Method Name	(+)-RostonRevPlus.dam	(+)-RostonRevPlus.dam	(+)-RostonRevPlus.dam	(+)-RostonRevPlus.dam	(+)-RostonRevPlus.dam	(+)-RostonRevPlus.dam	(+)-RostonRevPlus.dam	(+)-RostonRevPlus.dam	(+)-RostonRevPlus.dam	slope cps /pmole	Intercept cps
ethanolamine	34227.9	3.37955e+06	1.77557e+06	2.67713e+06	115686	2.24427e+06	2.67189e+06	415414	1.22647e+06	19714	6840
glycine	0	0	84.6908	169.381	84.7	84.6925	0	169.382	84.6972	100.5	30.4
alanine	99686.5	2.09146e+07	2.19435e+07	1.52396e+07	319867	2.28328e+07	2.00198e+07	1.66688e+07	2.03857e+06	48780	51484
betaine aldehyde	1498.77	80519	45291.9	60145.6	437.879	36336.9	145665	33814.7	72800.8
4-aminobutyrate	762300	2.74973e+07	2.69169e+07	2.36292e+07	1.98793e+06	2.94016e+07	2.16546e+07	1.38042e+07	4.3292e+06	69460	304000
dimethylglycine	126967	2.25371e+07	1.99083e+07	1.7431e+07	300794	1.46936e+07	1.49552e+07	1.03476e+07	6.10497e+06	146000	300000
serine	100777	2.91642e+07	2.75552e+07	2.09586e+07	282515	1.82422e+07	2.00511e+07	1.61803e+07	1.35023e+06	14231	-5852
P5C	774.057	109083	170200	78000	2790.14	84241.4	106722	47810.2	53436	4030	4969
proline	628322	7.3495e+07	6.94611e+07	5.70637e+07	1.72685e+06	7.46993e+07	6.9797e+07	6.87188e+07	1.45658e+07	1030000	-225000
H-proline	3359.29	298472	372116	152960	4974.16	362915	273504	289869	337.925	1030000	-225000
betaine	1.76066e+06	6.76009e+07	7.43503e+07	6.94986e+07	5.37346e+06	8.08054e+07	7.62551e+07	7.58956e+07	63204.4	28075	-33456
valine	837.223	958199	867000	623471	3102.46	935075	868919	750761	101494	4613	4108
threonine	214305	5.36016e+07	5.21942e+07	3.9625e+07	700640	4.60506e+07	4.72077e+07	3.78373e+07	3.59101e+06	58873	192000
homoserine	835.941	29619.1	35145	22324.1	414.387	31473.3	36371.6	26845.1	840.854	12960	7680
cysteine	84.6998	179.002	0	84.6945	84.6946	0	0	0	84.6998
nicotinamide	3605.81	4.17957e+06	926240	1.30753e+06	5944.29	1.27577e+06	4.66563e+06	529110	2933.69	5209	-11755
taurine	4858.36	284855	308763	218396	7645.57	493140	375055	535099	206352	6116	5864
Imidazoleacetic acid	4176.79	178586	162120	215403	7128.6	196260	148590	181586	2243.17	1430000	116000
DL-Pipecolic acid	407228	3.29202e+07	3.44444e+07	2.86305e+07	1.03627e+06	3.23676e+07	3.40309e+07	2.92545e+07	398349	23318	258000
hydroxyproline	19025.9	5.56424e+06	7.97924e+06	4.3928e+06	86934.4	3.90659e+06	4.41719e+06	2.90287e+06	2.75647e+06	69105	39234
Leucine	354.387	139775	99757	69276	84.8243	80796.9	104230	86042.3	13325.2
Isoleucine	12417.4	1.89477e+07	1.6756e+07	1.12153e+07	59281.5	1.65739e+07	1.78272e+07	1.34017e+07	1.80792e+06	29520	-28960
leucine-isoleucine	126163	9.15151e+07	8.11929e+07	6.145e+07	523460	7.30038e+07	8.21572e+07	6.98351e+07	1.43873e+07	315000	-81673
ornithine	517.772	2.31525e+07	2.32155e+07	1.40835e+07	0	2.73933e+07	2.36144e+07	1.9126e+07	4.8858e+06	80917	325000
asparagine	62226.8	1.71612e+07	1.81933e+07	1.45543e+07	192371	1.8012e+07	2.12243e+07	1.97565e+07	7570.83	2293	4174
aspartate	9855.78	3.16474e+06	2.65003e+06	2.35116e+06	12011.3	3.56166e+06	4.64612e+06	2.45681e+06	828861	19570	-10502
Methylcysteine	421.899	189918	164243	121478	788.85	161829	163319	126777	13751	2340	-6854
homocysteine	529.41	31606.3	39545.3	20645.2	290.375	20093.3	20925.4	14310.2	373467	24435	-80540
methylnicotinamide	759.301	1.38633e+06	242963	744622	2075.25	696343	842227	153616	211.634
lysine	64284.8	5.28217e+06	5.23947e+06	3.54299e+06	54826.5	4.65754e+06	4.60626e+06	3.92188e+06	358073	1618	29338
glutamine	1.05887e+06	6.18625e+07	6.38496e+07	5.80119e+07	2.91776e+06	6.16694e+07	6.24597e+07	5.61401e+07	52759.6	92813	-177000
glutamate	544111	5.95947e+07	6.01305e+07	5.04323e+07	1.68251e+06	6.66856e+07	6.8769e+07	6.23551e+07	3.24547e+06	52540	512000
methionine	4416.35	2.23274e+07	1.12887e+07	7.58077e+06	17999.8	1.33375e+07	1.4428e+07	8.31008e+06	6.08688e+06	135000	-97810
histidine	450818	1.11557e+08	9.38944e+07	1.33148e+08	2.97859e+06	1.24125e+08	1.29625e+08	1.328e+08	1.57359e+07	304000	8000000
2-Aminooctanoic acid	264.014	6875.88	8571.92	4154.02	77.9551	7912.2	3853.4	8223.97	312.905	508	-9.03
2-amino adipic acid	33593.1	4.69574e+06	4.55054e+06	4.09329e+06	85062.8	4.40845e+06	3.89384e+06	3.40186e+06	2.8642e+06	124000	-213000
Methionine sulfoxide	23154	209373	169966	163064	39842.9	240635	290632	246451	232152	9170	17047
phenylalanine	26068.6	3.60627e+07	3.42881e+07	2.20757e+07	97185.9	2.94324e+07	3.59414e+07	2.62076e+07	4.3726e+06	61587	-91800
1-Methyl-Histidine	1257.28	5.04941e+06	7.27794e+06	5.04671e+06	37979.4	5.89185e+06	5.21921e+06	6.53215e+06	1.29876e+08	3100000	448000
arginine	957035	4.17143e+07	4.70928e+07	3.73714e+07	3.01232e+06	4.83285e+07	4.80983e+07	3.98294e+07	5.34795e+06	92160	-1070000
citrulline	21581.6	2.04668e+06	1.95765e+06	1.61696e+06	1385.79	1.99844e+06	1.91573e+06	1.55925e+06	1.8379e+07	189000	1530000
N-carbamoyl-L-aspartate	175.508	231989	216027	107136	1521.54	263063	140494	150800	69.7431
tyrosine	3985.52	3.32298e+06	3.11984e+06	2.2409e+06	13733.7	2.85551e+06	2.71891e+06	2.35038e+06	397010	7222	-15863
Phosphorylcholine	2065.92	2.00286e+06	6.74199e+06	3.51382e+06	48.7484	9.0236e+06	2.36602e+06	1.41396e+07	13424.6	76930	52123
3-phospho-serine	63.502	28973.8	9594.38	9462.36	169.119	12710.5	15830.7	7456.01	73.6573
N6-Acetyl-L-lysine	79862.2	2.07266e+07	2.02884e+07	1.72477e+07	264637	1.86249e+07	1.80438e+07	1.46293e+07	4341.24
tryptophan	2348.48	4.56118e+06	4.44901e+06	3.31789e+06	11744.8	7.35669e+06	8.4961e+06	7.57756e+06	2.62248e+06	29800	-55500
Kynurenine	244.762	255132	299122	216080	1289.63	425935	517934	488107	201823
Flavone	1633.3	10428.6	7435.88	24244.9	2949.15	5085.46	9598.28	12814.1	490.846
cystathionine	1281.63	4.41218e+06	4.76312e+06	2.53513e+06	68.9954	2.2913e+06	2.13493e+06	1.42952e+06	538762	25683	-137000
5-methoxytryptophan	217.296	101532	104513	86351.4	93.5981	118519	104748	94212.7	318.014
Cystine	1206.97	78.4513	242.6	254.044	423.481	410.217	83.425	72.3441	808155	24240	-101000
biotin	1508.38	201079	107753	100865	4008.41	122394	92336.2	71985.1	3472.14
Glycerophosphocholine	868842	6.4333e+07	6.40026e+07	6.16734e+07	3.62239e+06	5.93824e+07	5.1153e+07	5.73032e+07	99853.3	4192	-902
thiamine	255718	1.37542e+08	5.74306e+07	1.39436e+08	4696.34	5.75326e+06	1.05456e+08	3.39814e+07	91853.8
S-ribosyl-L-homocysteine_pos	313.341	45067.7	29607.5	12213.2	247.604	13753.7	7768.48	5383.03	720.186
homocystine	204.493	196540	36419.4	95837.3	585.52	98228.4	131049	19795.3	129.567	225	1590
glutathione	148.904	38389.9	61924.7	30242.8	783.221	74662.5	89128.2	63618.4	1842.83	17177	-1960
Nicotinamide ribotide	497.959	4.19624e+06	875746	1.84513e+06	1592.39	732929	3.78786e+06	958147	269.565
thiamine-phosphate	83.3724	492945	954170	508701	168.1	775110	546504	622065	255.854
AMP	12135.5	461176	1.95486e+07	496888	32927.3	1.81517e+07	400720	6.09307e+06	5565.51
S-adenosyl-L-methioninamine	167.289	4233.49	9603.13	1778.31	1277.11	3265.64	2204.21	5432.04	181.349
riboflavin	748.632	1.58196e+06	593132	982241	745.939	820139	2.39304e+06	438506	732.217
S-adenosyl-L-homoCysteine_pos	836.462	290549	217249	150706	84.0006	252917	207246	146166	84.6999
S-adenosyl-L-methionine	338.602	1.37278e+06	1.4535e+06	609522	736.016	917205	1.1277e+06	674515	257.258
ADP_pos	271.397	20514.6	649729	31726.1	82.8432	454441	14995.4	591292	178.726
folate	84.4705	2211.96	2795.8	1101.87	84.5528	2551.8	2370.25	1325.45	169.288
7,8-dihydrofolate	258.225	4120.4	5534.18	2486.07	259.008	2275.24	3306.69	2855.8	83.2096
5-methyl-THF	338.795	14407.5	16441.4	13382	83.6046	15689.7	13548.2	14031.2	83.8076
ATP_pos	253.181	1822.53	18851.5	4951.99	76.1308	9600.35	2124.23	30191.3	340.084
glutathione disulfide_pos	169.006	295518	293699	292688	1192.3	150212	216351	265507	677.382	17177	-1960
NAD+_pos	931.748	233564	869789	318637	253.719	954382	144493	577643	345.511
NADH	0	1775.71	1012.83	677.497	0	1374.06	338.773	1431.18	84.6919
NADP+_pos	169.475	437.089	4122.63	1103	84.6976	8074.43	431.652	5673.68	170.153
NADPH	169.419	256.101	9060.35	248.995	253.953	609.745	735.555	1355.23	83.5321
FAD	84.7	36923.1	236086	26172.3	592.9	317462	6625.98	169891	169.399
													∆rim15	stddev	Guy11-R1	stddev		∆rim15/Guy11
	uM	uM	uM	uM	uM	uM	uM	uM	uM
ethanolamine	0.694632	85.5409	44.8598	67.7258	2.76062	56.7471	67.5929	10.3625	30.9331				66.0422	20.3927	44.9009	30.3987		1.47084
glycine	-0.151244	-0.151244	0.270103	0.691449	0.270149	0.270112	-0.151244	0.69145	0.270135				0.270103	0.421346	0.270106	0.421347		0.999988
alanine	0.49408	213.849	224.395	155.68	2.75095	233.511	204.677	170.329	20.3678				197.975	37.006	202.839	31.6309		0.976019
betaine aldehyde
4-aminobutyrate	3.29902	195.748	191.57	167.904	12.1216	209.456	153.69	97.1796	28.975				185.074	15.0158	153.442	56.1386		1.20615
dimethylglycine	-0.592578	76.1546	67.1517	58.668	0.00271939	49.293	50.1891	34.4096	19.88				67.3248	8.74459	44.6306	8.86294		1.50849
serine	3.74635	1024.88	968.344	736.577	10.1316	641.139	704.692	568.692	47.6453				909.933	152.769	638.174	68.0482		1.42584
P5C	-0.520464	12.9173	20.5002	9.06092	-0.270329	9.83529	12.6244	5.31529	6.01328				14.1595	5.81991	9.25834	3.68857		1.52938
proline	0.414234	35.7864	33.8282	27.8101	0.947501	36.371	33.9912	33.4679	7.18				32.4749	4.15681	34.61	1.54734		0.938308
H-proline	0.110854	0.254113	0.289862	0.183476	0.111638	0.285396	0.241992	0.249936	0.109387				0.242483	0.0541384	0.259108	0.0231098		0.935839
betaine	31.9521	1204.53	1324.73	1238.33	96.2941	1439.7	1358.66	1352.25	1.72147				1255.86	61.9911	1383.53	48.7414		0.907721
valine	-0.354517	103.413	93.5283	67.1324	-0.10899	100.907	93.7363	80.9292	10.5556				88.0247	18.7562	91.8575	10.1205		0.958274
threonine	0.18943	453.6	441.647	334.898	4.31981	389.47	399.298	319.716	28.8673				410.049	65.3558	369.495	43.3889		1.10976
homoserine	-0.264045	0.846414	1.05961	0.564975	-0.280309	0.917953	1.10693	0.739394	-0.263856				0.823665	0.248099	0.921425	0.183792		0.893903
cysteine
nicotinamide	1.47445	402.316	90.036	126.635	1.69891	123.586	448.971	51.9164	1.40993				206.329	170.713	208.158	211.607		0.991214
taurine	-0.082214	22.8083	24.7629	17.3751	0.145648	39.8362	30.1824	43.2664	16.3904				21.6488	3.82796	37.7617	6.78419		0.5733
Imidazoleacetic acid	-0.039099	0.0218832	0.0161258	0.0347564	-0.0380669	0.028063	0.0113952	0.0229322	-0.0397751				0.0242551	0.00953911	0.0207968	0.00853662		1.16629
DL-Pipecolic acid	3.19984	700.365	733.047	608.381	16.6883	688.516	724.18	621.762	3.00946				680.598	64.6408	678.153	51.9895		1.00361
hydroxyproline	-0.146213	39.9754	57.4489	31.4997	0.34513	27.9817	31.6761	20.7195	19.6602				42.9747	13.2321	26.7924	5.5743		1.60398
Isoleucine	0.700836	321.421	284.297	190.452	1.4946	281.213	302.441	227.485	31.1124				265.39	67.5004	270.38	38.6347		0.981546
leucine	0.329899	145.392	129.007	97.6693	0.960528	116.009	130.538	110.979	22.9666				124.023	24.2485	119.175	10.1567		1.04068
ornithine	-2.00503	141.055	141.445	85.0159	-2.00823	167.26	143.909	116.175	28.1819				122.505	32.4672	142.448	25.5738		0.859999
asparagine	12.6587	3741.18	3966.22	3172.73	41.0374	3926.7	4627.16	4307.09	0.740695				3626.71	408.943	4286.98	350.666		0.845982
aspartate	0.520127	81.1253	67.9747	60.3388	0.5752	91.2663	118.973	63.0381	21.4452				69.8129	10.5145	91.0926	27.9681		0.766395
Methylcysteine	1.55468	42.0453	36.5593	27.4214	1.63309	36.0434	36.3616	28.5536	4.40278				35.342	7.38755	33.6529	4.41898		1.05019
homocysteine	1.65888	2.29479	2.45724	2.0705	1.65399	2.0592	2.07623	1.94087	9.29009				2.27418	0.194193	2.02543	0.0737301		1.12281
lysine	10.7994	1623.25	1610.05	1085.8	7.87655	1430.22	1414.38	1202.89	101.587				1439.7	306.557	1349.16	126.926		1.06711
glutamine	6.65784	334.218	344.923	313.474	16.672	333.178	337.435	303.39	1.23776				330.871	15.9894	324.668	18.5495		1.01911
glutamate	0.305587	562.264	567.363	475.07	11.1392	629.745	649.572	588.533	26.0132				534.899	51.8763	622.617	31.1374		0.859114
methionine	0.378616	83.0562	42.1722	28.4392	0.428925	49.7603	53.7992	31.1403	22.9063				51.2225	28.411	44.8999	12.0861		1.14081
histidine	-12.4164	170.325	141.274	205.836	-8.2589	190.995	200.042	205.263	12.7235				172.478	32.3352	198.766	7.21896		0.867744
2-Aminooctanoic acid	0.268744	6.77648	8.44582	4.09749	0.0856152	7.79649	3.8016	8.10334	0.316866				6.43993	2.19361	6.56714	2.39994		0.980629
2-amino adipic acid	0.994327	19.7933	19.2078	17.3641	1.20187	18.6349	16.5599	14.5761	12.4081				18.7884	1.26777	16.5903	2.02959		1.1325
Methionine sulfoxide	0.33299	10.4867	8.338	7.96168	1.24296	12.1913	14.9174	12.5084	11.7287				8.9288	1.36225	13.2057	1.49086		0.676133
phenylalanine	0.956928	293.524	279.117	179.969	1.5343	239.695	292.539	213.514	36.2447				250.87	61.8232	248.583	40.2552		1.0092
1-Methyl-Histidine	-0.0720553	0.742163	1.1016	0.741728	-0.0661324	0.87804	0.769549	0.981314	20.8755				0.861831	0.207648	0.876301	0.105893		0.983488
arginine	10.9974	232.12	261.3	208.558	22.148	268.004	266.755	221.893	34.8196				233.993	26.4208	252.217	26.2687		0.927742
citrulline	-3.99052	1.36687	1.13134	0.23006	-4.04395	1.23927	1.02045	0.0773804	44.5741				0.909424	0.600018	0.779031	0.617419		1.16738
tyrosine	1.37417	231.158	217.094	156.242	2.04906	198.794	189.336	163.822	28.5844				201.498	39.8186	183.984	18.0897		1.09519
Phosphorylcholine	-0.325342	12.6787	43.4802	22.499	-0.338452	58.3093	15.039	91.5604	-0.251517				26.2193	15.7342	54.9696	38.3699		0.476978
tryptophan	0.970612	77.4611	75.579	56.6005	1.12827	124.366	143.483	128.071	44.9326				69.8802	11.539	131.973	10.1385		0.529502
cystathionine	2.69208	88.5639	95.3962	52.0214	2.66848	47.2744	44.2303	30.4973	13.1558				78.6605	23.3217	40.6673	8.93809		1.93424
Cystine	2.10823	2.08495	2.08834	2.08857	2.09207	2.09179	2.08505	2.08483	18.7532				2.08729	0.00202644	2.08722	0.0039594		1.00003
Glycerophosphocholine	103.739	7673.41	7634	7356.19	432.167	7082.93	6101.38	6834.94	12.0176				7554.54	172.896	6673.08	510.401		1.13209
homocystine	-3.0789	433.223	77.3988	209.438	-2.23218	214.752	287.686	40.4563	-3.24541				240.02	179.873	180.965	127.031		1.32634
glutathione	0.0613874	1.17453	1.8596	0.93738	0.0798516	2.23038	2.65146	1.9089	0.110695				1.32384	0.478895	2.26358	0.37239		0.584842
glutathione disulfide_pos	0.0619726	8.6592	8.60626	8.57681	0.0917594	4.42953	6.35475	7.78562	0.0767708				8.61409	0.0417495	6.18997	1.6841		1.39162
mg		28.15	28.32	34.79		29.34	34.28	25.34
mg/mL		281.5	283.2	347.9		293.4	342.8	253.4
		umoles/g	umoles/g	umoles/g		umoles/g	umoles/g	umoles/g					∆rim15	stddev	Guy11-R1	stddev		∆rim15/Guy11
ethanolamine		0.301408	0.155951	0.192674		0.191045	0.195153	0.0381527					0.216677	0.0756411	0.14145	0.0894816		1.53183
glycine		0	0.00148781	0.00242223		0.00143611	0	0.00332555					0.00130335	0.0012216	0.00158722	0.00166792		0.821149
alanine		0.757922	0.790612	0.446065		0.794195	0.595634	0.670226					0.664866	0.190191	0.686685	0.100299		0.968226
betaine aldehyde		0	0	0		0	0	0
4-aminobutyrate		0.683656	0.664798	0.473138		0.702648	0.438712	0.370484					0.607197	0.116481	0.503948	0.175428		1.20488
dimethylglycine		0.272636	0.23921	0.170338		0.170026	0.148138	0.13813					0.227395	0.0521627	0.152098	0.0163124		1.49505
serine		3.62747	3.40606	2.10644		2.17243	2.04477	2.22946					3.04666	0.821742	2.14889	0.0945737		1.41778
P5C		0.0477364	0.0742254	0.0275406		0.0352957	0.0383457	0.0230298					0.0498342	0.023413	0.0322237	0.00810689		1.54651
proline		0.125656	0.117987	0.0787463		0.122552	0.0979493	0.13044					0.107463	0.0251634	0.116981	0.016947		0.91864
H-proline		0.000508911	0.000632091	0.000208742		0.000594894	0.00038255	0.000548864					0.000449915	0.000217753	0.000508769	0.000111706		0.884321
betaine		4.16546	4.56491	3.46759		4.79803	3.8702	5.21034					4.06599	0.555381	4.62619	0.686399		0.878906
valine		0.368625	0.331507	0.193984		0.345131	0.274477	0.320772					0.298038	0.0920054	0.31346	0.03589		0.950801
threonine		1.61069	1.55882	0.962084		1.32679	1.16426	1.26096					1.3772	0.360435	1.25067	0.0817534		1.10117
homoserine		0.00394479	0.00467391	0.00238293		0.00402862	0.00399934	0.0039599					0.00366721	0.00117044	0.00399596	3.44858e-05		0.91773
cysteine		0	0	0		0	0	0
nicotinamide		1.42395	0.312717	0.359761		0.416196	1.30542	0.199061					0.698809	0.62843	0.640225	0.586214		1.09151
taurine		0.0813162	0.0877298	0.0501791		0.136054	0.0882866	0.171068					0.073075	0.0200861	0.131803	0.0415541		0.554426
Imidazoleacetic acid		0.000216633	0.000195003	0.000212289		0.000228909	0.000147299	0.000244796					0.000207975	1.14423e-05	0.000207001	5.23101e-05		1.0047
DL-Pipecolic acid		2.47661	2.57714	1.73953		2.33577	2.10321	2.44105					2.26443	0.457347	2.29335	0.172871		0.98739
hydroxyproline		0.142528	0.203373	0.0909625		0.0958689	0.0928306	0.0823429					0.145621	0.0562688	0.0903475	0.00709668		1.61179
Isoleucine		1.13932	1.0014	0.545419		0.956075	0.880223	0.894964					0.895381	0.310823	0.910421	0.040219		0.983481
leucine		0.515317	0.454369	0.279791		0.39427	0.379837	0.436658					0.416493	0.122246	0.403588	0.0295344		1.03197
ornithine		0.508206	0.506531	0.250132		0.576908	0.425655	0.466377					0.421623	0.148518	0.489646	0.0782657		0.861077
asparagine		13.2452	13.9603	9.08328		13.3403	13.4612	16.9473					12.0963	2.63371	14.5829	2.04847		0.829482
aspartate		0.286342	0.238187	0.171942		0.309292	0.345546	0.246716					0.232157	0.0574376	0.300518	0.0499957		0.772522
Methylcysteine		0.143839	0.123604	0.0743511		0.117548	0.101537	0.106547					0.113931	0.0357394	0.108544	0.0081903		1.04963
homocysteine		0.002259	0.00281907	0.00118315		0.00136443	0.00121748	0.00111282					0.00208708	0.0008314	0.00123158	0.000126397		1.69464
lysine		5.72806	5.64708	3.08998		4.83785	4.09445	4.70437					4.82171	1.50027	4.54556	0.39633		1.06075
glutamine		1.16362	1.19444	0.881908		1.11288	0.964927	1.171					1.07999	0.172235	1.08294	0.106251		0.997278
glutamate		1.9963	2.00232	1.36466		2.14533	1.89401	2.32134					1.78776	0.36643	2.12023	0.214769		0.843193
methionine		0.293704	0.147576	0.080657		0.168308	0.155836	0.121396					0.173979	0.10895	0.148513	0.0242984		1.17147
histidine		0.649169	0.542691	0.627343		0.69329	0.619772	0.859034					0.606401	0.0562436	0.724032	0.122557		0.837534
2-Aminooctanoic acid		0.0231181	0.0288739	0.0110053		0.0256569	0.0103059	0.0309179					0.0209991	0.00912079	0.0222936	0.0107097		0.941934
2-amino adipic acid		0.0667815	0.0643131	0.047053		0.0601246	0.045407	0.053598					0.0593826	0.0107488	0.0530432	0.00737447		1.11951
Methionine sulfoxide		0.0360701	0.0282663	0.0219278		0.0404167	0.042545	0.0480481					0.0287547	0.00708377	0.0436699	0.00393808		0.658456
phenylalanine		1.03931	0.982203	0.51455		0.813696	0.85059	0.83882					0.845355	0.287906	0.834368	0.0188453		1.01317
1-Methyl-Histidine		0.00289243	0.00414427	0.00233913		0.00323822	0.00245509	0.00415694					0.00312528	0.000924823	0.00328342	0.000851827		0.951836
arginine		0.785515	0.883837	0.567866		0.875959	0.746084	0.832265					0.745739	0.161697	0.818103	0.0660858		0.911547
citrulline		0.0190316	0.0180857	0.0121316		0.0178248	0.0146178	0.0160533					0.0164163	0.00374068	0.0161653	0.00160644		1.01553
tyrosine		0.816283	0.761723	0.445151		0.672868	0.548315	0.641074					0.674385	0.200389	0.620752	0.0647155		1.0864
Phosphorylcholine		0.0461954	0.154681	0.065606		0.199845	0.04482	0.362611					0.0888273	0.0578505	0.202426	0.158911		0.438815
tryptophan		0.271725	0.263448	0.159902		0.420569	0.415731	0.501582					0.231691	0.0623091	0.445961	0.04823		0.519533
cystathionine		0.305051	0.327345	0.141792		0.151951	0.121173	0.109728					0.258063	0.101309	0.127617	0.0218364		2.02216
Cystine		-8.26925e-05	-7.02403e-05	-5.6499e-05		-5.60144e-05	-6.76061e-05	-9.23596e-05					-6.98106e-05	1.31021e-05	-7.19933e-05	1.85656e-05		0.969681
Glycerophosphocholine		26.8905	26.5899	20.8464		23.7873	17.496	26.5635					24.7756	3.40612	22.6156	4.64591		1.09551
homocystine		1.54992	0.284173	0.610858		0.742437	0.848205	0.171804					0.814983	0.657099	0.587482	0.363851		1.38725
glutathione		0.00395433	0.00634962	0.00251794		0.00739261	0.00755564	0.00729091					0.00427397	0.00193573	0.00741305	0.000133544		0.576546
glutathione disulfide_pos		0.0305408	0.0301705	0.024475		0.014886	0.018357	0.0304801					0.0283954	0.00340025	0.021241	0.0081873		1.33682
